# Supplementary material for: Genome-wide identification, characterization and evolutionary analysis of SNF1-related kinase (SnRK) and late embryogenesis abundant (LEA) protein-encoding genes in Hordeum vulgare under drought stress
Source: Research Square preprint supplement (doi:10.21203/rs.3.rs-7348463/v1), 2025-09-12
Supplement: Supplementary file 1 [file c071531375b449c2d071f4d8.xlsx]

## Sheet: Sheet 1
	HvPK-like (sequencing)	CCAGGCAGTATCTTCCAGGACGTTGAAAGAAAATGGGCTCTTGGGCTCCAGGTCTTGCACATTATCCACTTTACTTTGCTTTGTTTTGCACATTCAGCTGTTGAGCTAATGCATCACTTATCCAGCAGTCTCGAGCTCACCCTCGTGAGATAATGATTCCGGTTCTAATGGCACTTCAAGAATTAAATGTCTCTTCAGGTAGAACGGACACACCAACTTGAACATCGTGAGTGTGGCTCTGGTAGTCGAGCGCTTGCTGGCATTCTTTCTGTTGACAATCATGAGATGCCAACCACAGCTTTG
	Forward primer	CCAGGCAGTATCTTCCAGGA
	Reverse primer	CAAAGCTGTGGTTGGCATCT
query protein	BAO51907.1 SnRK1 alpha subunit [Hordeum vulgare subsp. vulgare]	MDGNTRGGGHSEALKNYNLGRTLGIGTFGKVRIAEHKHTGHKVAIKILNRRQMRTMNMEEKAKREIKILRLFIHPHIIRLYEVIYTPTDIFVVMEYCKYGELFDCIVEKGRLQEDEARRIFQQIISGVEYCHRNMVVHRDLKPENLLLDSKYNVKLADFGLSNVMHDGHFLKTSCGSPNYAAPEVISGKLYAGPEVDVWSCGVILYALLCGTLPFDDDNIPNLFKKIKGGIYILPSHLSALARDLIPRMLVVDPMKRITIREIREHPWFQNRLPRYLAVPPPDTAQQAKMIDEDTLKDIVNLGYDKDHVCESLCNRLQNEATVAYYLLLDNRFRATSGYLGADYQQSMGRSLNQFTSSESASPSTRQYLPGTNDSQGSGLRPYYPVERKWALGLQSRAH…
	LEA3 (sequencing)	CACCGAGGCCAAGGACAACCTTCCATGACTTGCCTGACAGTCCATACGAGACGGCGCACGCGGCCGTGGAGTTCGCCGCCGAGGGCAAGGACCCGACCGGCAACACCCTCGGCGAGAAGACGGAGGCGGCCAAGCAGAAGGCCGCCGAGACGACGGAGGCGGCCAAGCAGAAGGCCGCCGAGGCAACCGAGGCGGCCAAGCAGTAGGCGTCCGACACGGCGCAGTACACCAAGGAGTCCACGCAGTACACCAAGGAGTCC
	Forward primer	CACCGAGGCCAAGGACAA
	Reverse primer	GGACTCCTTGGTGTACTGCG
query protein	ACH89913.1 late embryogenesis abundant protein [Hordeum vulgare subsp. vulgare]	MASNQNQGSYHAGETKARTEEKTGQMMGATKQKAGQTTEATKQKAGETAEATKQKTGETAEAAKQKATEAKDKTAQTAQAAKDKTYETAQAAKERAAQGKDQTGSALGEKTEAAKQKAAETTEAAKQKAAEATEAAKQKASDTAQYTKESAVAGKDKTGSVLQQAGETVVNAVVGAKDAVANTLGMGGDNTSATKDATTGATVKDTTTTRNH
				P1	P2
	Drought	control	25.3282	24.7898	25.2368
		Treatment	26.4227	23.2707	23.4099
			housekeeping	SnRK1	Δct	ΔΔct	fold change
	Drought	control	25.3282	24.7898	-0.538415	0	1
		treatment	26.4227	23.2707	-3.15195	-2.61354	6.12002
			housekeeping	LEA	Δct	ΔΔct	fold change
	Drought	control	25.3282	25.2368	-0.0913916	0	1
		treatment	26.4227	23.4099	-3.0128	-2.92141	7.57587

## Sheet: Table S1
Table S1. Analysis of protein physical and chemical properties
Gene name	Gene rename	Peptide name	number of amino acid	Molecular weight	Theoretical pI	Total number of negatively charged residue (Asp + Glu)	Total number of positively charged residue (Arg +Lys)	Total number of atoms	Instability	Grad average of hydropathicity (GRAVY)	Chromosome Name	Gene Start (bp)	Gene End (bp)
HORVU.MOREX.r3.1HG0017930	HvSnRK-1	HORVU.MOREX.r3.1HG0017930.1	466	52140	8.04	59	61	7357	stable	-0.266	chr1H	57251947	57255691
HORVU.MOREX.r3.1HG0017980	HvSnRK-2	HORVU.MOREX.r3.1HG0017980.1	466	51682.1	6.95	58	57	7277	stable	-0.275	chr1H	57462815	57468279
HORVU.MOREX.r3.1HG0049840	HvSnRK-3	HORVU.MOREX.r3.1HG0049840.1	633	69599.2	8.36	75	79	9736	unstable	-0.308	chr1H	331852002	331857133
HORVU.MOREX.r3.1HG0057490	HvSnRK-4	HORVU.MOREX.r3.1HG0057490.1	341	38534.9	5.85	54	49	5425	stable	-0.428	chr1H	382744420	382747805
HORVU.MOREX.r3.1HG0060110	HvSnRK-5	HORVU.MOREX.r3.1HG0060110.1	323	36152.7	6.62	36	33	5060	stable	-0.112	chr1H	400599387	400600449
HORVU.MOREX.r3.1HG0069650	HvSnRK-6	HORVU.MOREX.r3.1HG0069650.1	517	57381.6	6.31	73	68	8044	stable	-0.375	chr1H	448085945	448088418
HORVU.MOREX.r3.1HG0071290	HvSnRK-7	HORVU.MOREX.r3.1HG0071290.1	476	54201.5	9.43	55	73	7685	unstable	-0.489	chr1H	454892659	454895289
HORVU.MOREX.r3.1HG0072410	HvSnRK-8	HORVU.MOREX.r3.1HG0072410.1	547	60748.2	6.2	85	78	8526	unstable	-0.388	chr1H	458364651	458370660
HORVU.MOREX.r3.1HG0075630	HvSnRK-9	HORVU.MOREX.r3.1HG0075630.1	382	43264.2	5.52	59	49	6056	unstable	-0.393	chr1H	472892812	472896443
HORVU.MOREX.r3.1HG0077650	HvSnRK-10	HORVU.MOREX.r3.1HG0077650.1	525	58327.6	8.11	70	72	8200	unstable	-0.407	chr1H	479253532	479255394
HORVU.MOREX.r3.1HG0082030	HvSnRK-11	HORVU.MOREX.r3.1HG0082030.1	500	56984	8.77	61	68	8071	unstable	-0.276	chr1H	489721090	489726039
HORVU.MOREX.r3.1HG0092880	HvSnRK-12	HORVU.MOREX.r3.1HG0092880.1	526	59509.7	6.1	80	72	8338	unstable	-0.569	chr1H	510020224	510024012
HORVU.MOREX.r3.2HG0108670	HvSnRK-13	HORVU.MOREX.r3.2HG0108670.1	493	55366	8.94	59	70	7831	stable	-0.295	chr2H	28264396	28265877
HORVU.MOREX.r3.2HG0110800	HvSnRK-14	HORVU.MOREX.r3.2HG0110800.1	304	34185.2	8.45	39	42	4829	stable	-0.282	chr2H	33611366	33613270
HORVU.MOREX.r3.2HG0112410	HvSnRK-15	HORVU.MOREX.r3.2HG0112410.1	450	50830.8	9.07	56	67	7177	stable	-0.427	chr2H	40813735	40816403
HORVU.MOREX.r3.2HG0112440	HvSnRK-16	HORVU.MOREX.r3.2HG0112440.1	436	47162.8	6.77	54	52	6621	stable	-0.102	chr2H	40933099	40935262
HORVU.MOREX.r3.2HG0119920	HvSnRK-17	HORVU.MOREX.r3.2HG0119920.1	595	65596.2	8.87	70	78	9276	unstable	-0.262	chr2H	69109540	69114221
HORVU.MOREX.r3.2HG0121170	HvSnRK-18	HORVU.MOREX.r3.2HG0121170.1	451	51126.8	7.95	57	59	7174	stable	-0.416	chr2H	75272812	75277875
HORVU.MOREX.r3.2HG0123910	HvSnRK-19	HORVU.MOREX.r3.2HG0123910.1	341	38594.2	5.45	49	38	5408	stable	-0.213	chr2H	91816073	91820858
HORVU.MOREX.r3.2HG0124380	HvSnRK-20	HORVU.MOREX.r3.2HG0124380.1	592	65619.3	9.06	67	79	9251	unstable	-0.274	chr2H	95109184	95114473
HORVU.MOREX.r3.2HG0133550	HvSnRK-21	HORVU.MOREX.r3.2HG0133550.1	544	61306	6.49	81	77	8608	stable	-0.482	chr2H	157407636	157411227
HORVU.MOREX.r3.2HG0151360	HvSnRK-22	HORVU.MOREX.r3.2HG0151360.1	565	62122.6	5.21	83	64	8711	stable	-0.279	chr2H	336293220	336298031
HORVU.MOREX.r3.2HG0153230	HvSnRK-23	HORVU.MOREX.r3.2HG0153230.1	360	40302.3	8.76	43	48	5688	stable	-0.291	chr2H	355338435	355342439
HORVU.MOREX.r3.2HG0188200	HvSnRK-24	HORVU.MOREX.r3.2HG0188200.1	542	60269.1	6.15	76	71	8485	unstable	-0.395	chr2H	590941124	590944276
HORVU.MOREX.r3.2HG0196120	HvSnRK-25	HORVU.MOREX.r3.2HG0196120.1	557	61401.8	5.55	81	64	8585	stable	-0.325	chr2H	615155571	615160085
HORVU.MOREX.r3.2HG0201420	HvSnRK-26	HORVU.MOREX.r3.2HG0201420.1	342	38824.4	5.75	47	38	5422	stable	-0.247	chr2H	626390179	626401164
HORVU.MOREX.r3.2HG0208170	HvSnRK-27	HORVU.MOREX.r3.2HG0208170.1	432	47901.3	8.65	56	60	6760	unstable	-0.158	chr2H	642978435	642979854
HORVU.MOREX.r3.2HG0216470	HvSnRK-28	HORVU.MOREX.r3.2HG0216470.1	393	44200.9	6.04	57	50	6142	stable	-0.51	chr2H	660536702	660538568
HORVU.MOREX.r3.3HG0242960	HvSnRK-29	HORVU.MOREX.r3.3HG0242960.1	511	56386.1	8.4	68	71	7894	unstable	-0.313	chr3H	86500680	86502215
HORVU.MOREX.r3.3HG0246590	HvSnRK-30	HORVU.MOREX.r3.3HG0246590.1	464	52290.3	9.22	58	72	7405	stable	-0.441	chr3H	116242290	116244135
HORVU.MOREX.r3.3HG0264740	HvSnRK-31	HORVU.MOREX.r3.3HG0264740.1	449	50554.7	6.58	62	60	7133	unstable	-0.312	chr3H	294070678	294092080
HORVU.MOREX.r3.3HG0273330	HvSnRK-32	HORVU.MOREX.r3.3HG0273330.1	520	58634.7	5.85	80	67	8206	unstable	-0.486	chr3H	378397294	378401215
HORVU.MOREX.r3.3HG0286490	HvSnRK-33	HORVU.MOREX.r3.3HG0286490.1	502	57379.3	8.44	61	65	8112	unstable	-0.365	chr3H	471947561	471952534
HORVU.MOREX.r3.3HG0290170	HvSnRK-34	HORVU.MOREX.r3.3HG0290170.1	478	53116.6	8.88	61	67	7471	stable	-0.359	chr3H	495268658	495270428
HORVU.MOREX.r3.3HG0290180	HvSnRK-35	HORVU.MOREX.r3.3HG0290180.1	519	57719.3	8.55	65	69	8142	unstable	-0.296	chr3H	495274268	495278213
HORVU.MOREX.r3.3HG0295710	HvSnRK-36	HORVU.MOREX.r3.3HG0295710.1	521	57503.4	5.59	80	69	8065	stable	-0.402	chr3H	520849688	520852544
HORVU.MOREX.r3.3HG0297850	HvSnRK-37	HORVU.MOREX.r3.3HG0297850.1	509	57649.9	8.85	63	70	8148	unstable	-0.539	chr3H	531575919	531578722
HORVU.MOREX.r3.3HG0299220	HvSnRK-38	HORVU.MOREX.r3.3HG0299220.1	362	41938.6	5.96	60	53	5833	unstable	-0.617	chr3H	535966213	535970570
HORVU.MOREX.r3.3HG0303750	HvSnRK-39	HORVU.MOREX.r3.3HG0303750.1	547	61205.9	6.63	85	82	8591	unstable	-0.437	chr3H	553726688	553733659
HORVU.MOREX.r3.3HG0320770	HvSnRK-40	HORVU.MOREX.r3.3HG0320770.1	392	44883.4	6.74	50	48	6298	unstable	-0.389	chr3H	597798700	597802231
HORVU.MOREX.r3.3HG0320810	HvSnRK-41	HORVU.MOREX.r3.3HG0320810.1	513	58815.8	6.58	65	62	8272	unstable	-0.294	chr3H	597849858	597855987
HORVU.MOREX.r3.3HG0320820	HvSnRK-42	HORVU.MOREX.r3.3HG0320820.1	346	39484.4	7.06	39	39	5529	unstable	-0.273	chr3H	597872534	597875669
HORVU.MOREX.r3.3HG0320830	HvSnRK-43	HORVU.MOREX.r3.3HG0320830.1	146	16886.7	8.87	18	21	2395	stable	-0.277	chr3H	597875730	597878020
HORVU.MOREX.r3.4HG0342860	HvSnRK-44	HORVU.MOREX.r3.4HG0342860.1	361	40647.2	4.8	57	36	5665	stable	-0.278	chr4H	42461209	42463941
HORVU.MOREX.r3.4HG0349000	HvSnRK-45	HORVU.MOREX.r3.4HG0349000.1	516	56928.7	5.3	77	57	7946	stable	-0.268	chr4H	89928482	89932828
HORVU.MOREX.r3.4HG0350770	HvSnRK-46	HORVU.MOREX.r3.4HG0350770.1	442	48157.4	9.04	56	64	6816	stable	-0.18	chr4H	101258126	101259987
HORVU.MOREX.r3.4HG0352300	HvSnRK-47	HORVU.MOREX.r3.4HG0352300.1	444	50382.1	9.16	55	66	7129	stable	-0.405	chr4H	113542740	113545524
HORVU.MOREX.r3.4HG0356420	HvSnRK-48	HORVU.MOREX.r3.4HG0356420.1	439	50278.7	7.18	67	67	7114	stable	-0.476	chr4H	146938826	146943753
HORVU.MOREX.r3.4HG0356730	HvSnRK-49	HORVU.MOREX.r3.4HG0356730.1	533	58806.9	5.65	80	67	8237	stable	-0.412	chr4H	149235307	149237485
HORVU.MOREX.r3.4HG0380570	HvSnRK-50	HORVU.MOREX.r3.4HG0380570.1	449	50975.6	8.27	63	66	7212	stable	-0.39	chr4H	413715267	413720462
HORVU.MOREX.r3.4HG0385110	HvSnRK-51	HORVU.MOREX.r3.4HG0385110.1	509	58211.1	8.58	59	65	8183	unstable	-0.345	chr4H	453580908	453587253
HORVU.MOREX.r3.4HG0410700	HvSnRK-52	HORVU.MOREX.r3.4HG0410700.1	548	61073.4	5.15	83	61	8559	stable	-0.284	chr4H	589397759	589402492
HORVU.MOREX.r3.4HG0410930	HvSnRK-53	HORVU.MOREX.r3.4HG0410930.1	445	49912.2	7.67	59	60	7008	stable	-0.38	chr4H	589857847	589862339
HORVU.MOREX.r3.5HG0433220	HvSnRK-54	HORVU.MOREX.r3.5HG0433220.1	433	47500	9.51	47	59	6726	unstable	-0.19	chr5H	43385211	43386709
HORVU.MOREX.r3.5HG0438740	HvSnRK-55	HORVU.MOREX.r3.5HG0438740.1	357	40151	4.94	51	35	5611	stable	-0.201	chr5H	67267802	67270282
HORVU.MOREX.r3.5HG0449270	HvSnRK-56	HORVU.MOREX.r3.5HG0449270.1	559	62796	5.87	82	73	8813	unstable	-0.298	chr5H	158231428	158237505
HORVU.MOREX.r3.5HG0450250	HvSnRK-57	HORVU.MOREX.r3.5HG0450250.1	623	68759	5.62	84	69	9616	unstable	-0.414	chr5H	171924048	171931016
HORVU.MOREX.r3.5HG0451470	HvSnRK-58	HORVU.MOREX.r3.5HG0451470.1	520	57377.4	5.53	77	61	8043	stable	-0.276	chr5H	192242218	192246759
HORVU.MOREX.r3.5HG0462150	HvSnRK-59	HORVU.MOREX.r3.5HG0462150.1	542	59709.4	4.99	90	61	8320	stable	-0.448	chr5H	307153040	307155422
HORVU.MOREX.r3.5HG0464580	HvSnRK-60	HORVU.MOREX.r3.5HG0464580.1	440	49608.2	9.25	56	68	7034	stable	-0.435	chr5H	324633432	324636164
HORVU.MOREX.r3.5HG0479090	HvSnRK-61	HORVU.MOREX.r3.5HG0479090.1	223	24699.5	5.78	26	21	3471	stable	0.079	chr5H	423997969	423999249
HORVU.MOREX.r3.5HG0483990	HvSnRK-62	HORVU.MOREX.r3.5HG0483990.1	446	47921	9.17	52	60	6776	stable	-0.147	chr5H	445397297	445399334
HORVU.MOREX.r3.5HG0484020	HvSnRK-63	HORVU.MOREX.r3.5HG0484020.1	432	47725.8	8.92	51	57	6712	stable	-0.174	chr5H	445724007	445725705
HORVU.MOREX.r3.5HG0487690	HvSnRK-64	HORVU.MOREX.r3.5HG0487690.1	448	48772.9	8.93	57	67	6872	unstable	-0.338	chr5H	466426799	466430424
HORVU.MOREX.r3.5HG0495800	HvSnRK-65	HORVU.MOREX.r3.5HG0495800.1	554	61627.8	5.36	94	79	8590	unstable	-0.492	chr5H	491294623	491298458
HORVU.MOREX.r3.5HG0509060	HvSnRK-66	HORVU.MOREX.r3.5HG0509060.1	431	47160.7	8.82	51	56	6680	unstable	-0.096	chr5H	523129801	523131331
HORVU.MOREX.r3.5HG0512820	HvSnRK-67	HORVU.MOREX.r3.5HG0512820.1	366	41530.3	4.86	59	38	5784	unstable	-0.307	chr5H	532600476	532606853
HORVU.MOREX.r3.5HG0517140	HvSnRK-68	HORVU.MOREX.r3.5HG0517140.1	627	68244.9	5.92	87	77	9604	stable	-0.275	chr5H	542954093	542957903
HORVU.MOREX.r3.5HG0517190	HvSnRK-69	HORVU.MOREX.r3.5HG0517190.1	596	65339.6	5.54	85	71	9187	unstable	-0.294	chr5H	543032082	543035992
HORVU.MOREX.r3.5HG0523860	HvSnRK-70	HORVU.MOREX.r3.5HG0523860.1	535	60056.4	6.31	81	76	8410	stable	-0.475	chr5H	557719255	557723478
HORVU.MOREX.r3.6HG0551960	HvSnRK-71	HORVU.MOREX.r3.6HG0551960.1	507	57024.2	8.68	77	82	8054	unstable	-0.419	chr6H	31679703	31685888
HORVU.MOREX.r3.6HG0565330	HvSnRK-72	HORVU.MOREX.r3.6HG0565330.1	797	89926.4	6.36	106	100	12697	stable	-0.245	chr6H	94470878	94475149
HORVU.MOREX.r3.6HG0565350	HvSnRK-73	HORVU.MOREX.r3.6HG0565350.1	465	52860.7	9.03	62	71	7493	stable	-0.482	chr6H	94666859	94670421
HORVU.MOREX.r3.6HG0569870	HvSnRK-74	HORVU.MOREX.r3.6HG0569870.1	443	49675	7.91	55	57	7020	stable	-0.203	chr6H	122070965	122074089
HORVU.MOREX.r3.6HG0604810	HvSnRK-75	HORVU.MOREX.r3.6HG0604810.1	547	60415.6	5.39	80	61	8432	unstable	-0.273	chr6H	447181738	447185951
HORVU.MOREX.r3.6HG0633900	HvSnRK-76	HORVU.MOREX.r3.6HG0633900.1	567	62111.9	5.28	84	59	8615	stable	-0.312	chr6H	561089744	561092164
HORVU.MOREX.r3.7HG0642750	HvSnRK-77	HORVU.MOREX.r3.7HG0642750.1	516	55464.6	5.77	63	51	7685	unstable	-0.189	chr7H	15415179	15418595
HORVU.MOREX.r3.7HG0686030	HvSnRK-78	HORVU.MOREX.r3.7HG0686030.1	579	63845.2	8.59	79	84	8917	unstable	-0.446	chr7H	219312769	219315014
HORVU.MOREX.r3.7HG0719220	HvSnRK-79	HORVU.MOREX.r3.7HG0719220.1	486	54143.2	8.74	61	68	7633	unstable	-0.288	chr7H	522970496	522972244
HORVU.MOREX.r3.7HG0720050	HvSnRK-80	HORVU.MOREX.r3.7HG0720050.1	398	44620.4	8.65	48	52	6328	unstable	-0.21	chr7H	528240248	528247671
HORVU.MOREX.r3.7HG0721290	HvSnRK-81	HORVU.MOREX.r3.7HG0721290.1	623	68878.8	8.96	74	83	9723	unstable	-0.328	chr7H	536516036	536524415
HORVU.MOREX.r3.1HG0031210	HvLEA-1	HORVU.MOREX.r3.1HG0031210.1	282	29538.3	9.92	13	34	4189	stable	-0.008	chr1H	153199221	153200440
HORVU.MOREX.r3.1HG0046460	HvLEA-2	HORVU.MOREX.r3.1HG0046460.1	266	28585.2	10.21	16	32	4069	unstable	0.01	chr1H	306011732	306013183
HORVU.MOREX.r3.1HG0055610	HvLEA-3	HORVU.MOREX.r3.1HG0055610.1	208	22075.6	9.77	14	21	3149	unstable	0.38	chr1H	371367872	371368798
HORVU.MOREX.r3.1HG0060220	HvLEA-4	HORVU.MOREX.r3.1HG0060220.1	262	27356.4	9.36	17	24	3872	unstable	0.182	chr1H	401600698	401601486
HORVU.MOREX.r3.1HG0070590	HvLEA-5	HORVU.MOREX.r3.1HG0070590.1	206	21722.4	10.92	15	26	3118	unstable	0.319	chr1H	451569189	451569809
HORVU.MOREX.r3.1HG0080000	HvLEA-6	HORVU.MOREX.r3.1HG0080000.1	195	19961.7	8.87	27	30	2768	stable	-1.025	chr1H	485251521	485252201
HORVU.MOREX.r3.1HG0080020	HvLEA-7	HORVU.MOREX.r3.1HG0080020.1	213	21819.8	9.02	28	32	3032	stable	-1.036	chr1H	485270377	485271473
HORVU.MOREX.r3.1HG0082740	HvLEA-8	HORVU.MOREX.r3.1HG0082740.1	253	26125.9	8.48	20	23	3677	stable	0.183	chr1H	490769489	490770536
HORVU.MOREX.r3.1HG0092810	HvLEA-9	HORVU.MOREX.r3.1HG0092810.1	204	22469.6	5.77	30	26	3168	stable	-0.357	chr1H	509834049	509835024
HORVU.MOREX.r3.2HG0096290	HvLEA-10	HORVU.MOREX.r3.2HG0096290.1	227	25417.8	10.11	11	24	3624	unstable	0.112	chr2H	1851519	1852202
HORVU.MOREX.r3.2HG0124050	HvLEA-11	HORVU.MOREX.r3.2HG0124050.1	262	27229.5	9.63	22	31	3872	stable	0.376	chr2H	93041748	93042631
HORVU.MOREX.r3.2HG0135210	HvLEA-12	HORVU.MOREX.r3.2HG0135210.1	215	23064.8	9.3	13	20	3265	unstable	0.216	chr2H	168382086	168383018
HORVU.MOREX.r3.2HG0139280	HvLEA-13	HORVU.MOREX.r3.2HG0139280.1	202	22564.8	8.35	17	19	3172	stable	-0.161	chr2H	201421891	201422499
HORVU.MOREX.r3.2HG0140430	HvLEA-14	HORVU.MOREX.r3.2HG0140430.1	191	20053.6	10.34	8	21	2879	stable	0.591	chr2H	208760754	208761329
HORVU.MOREX.r3.2HG0140450	HvLEA-15	HORVU.MOREX.r3.2HG0140450.1	199	21385.1	8.96	13	17	3071	stable	0.561	chr2H	208767434	208768033
HORVU.MOREX.r3.2HG0140470	HvLEA-16	HORVU.MOREX.r3.2HG0140470.1	192	20599.1	9.14	12	17	2950	stable	0.421	chr2H	208914223	208914907
HORVU.MOREX.r3.2HG0167300	HvLEA-17	HORVU.MOREX.r3.2HG0167300.1	216	23270	8.77	14	18	3292	unstable	0.276	chr2H	469410889	469411894
HORVU.MOREX.r3.2HG0168560	HvLEA-18	HORVU.MOREX.r3.2HG0168560.1	333	35065.8	10.06	21	39	4926	unstable	-0.253	chr2H	477097984	477099839
HORVU.MOREX.r3.2HG0197000	HvLEA-19	HORVU.MOREX.r3.2HG0197000.1	113	11712	9.58	13	19	1623	stable	-1.071	chr2H	617341847	617342507
HORVU.MOREX.r3.2HG0197010	HvLEA-20	HORVU.MOREX.r3.2HG0197010.1	110	11458.7	8.86	16	18	1581	stable	-1.064	chr2H	617362350	617362682
HORVU.MOREX.r3.2HG0198570	HvLEA-21	HORVU.MOREX.r3.2HG0198570.1	211	22855.5	9.64	14	22	3228	stable	0.094	chr2H	620875925	620876560
HORVU.MOREX.r3.2HG0199510	HvLEA-22	HORVU.MOREX.r3.2HG0199510.1	221	23797.4	7.88	19	21	3317	stable	0.169	chr2H	622333068	622334053
HORVU.MOREX.r3.2HG0209950	HvLEA-23	HORVU.MOREX.r3.2HG0209950.1	252	27802.5	10.32	17	37	3965	unstable	-0.083	chr2H	646497553	646498631
HORVU.MOREX.r3.2HG0213800	HvLEA-24	HORVU.MOREX.r3.2HG0213800.1	220	24388.3	8.89	16	22	3432	unstable	0.111	chr2H	654775477	654776851
HORVU.MOREX.r3.2HG0213820	HvLEA-25	HORVU.MOREX.r3.2HG0213820.1	207	22141	9.04	12	19	3137	stable	0.372	chr2H	654836806	654837911
HORVU.MOREX.r3.3HG0233660	HvLEA-26	HORVU.MOREX.r3.3HG0233660.1	309	34065.8	4.8	53	35	4823	stable	-0.317	chr3H	32319037	32320102
HORVU.MOREX.r3.3HG0248140	HvLEA-27	HORVU.MOREX.r3.3HG0248140.1	151	16263.6	4.92	20	14	2300	stable	-0.027	chr3H	128113197	128113958
HORVU.MOREX.r3.3HG0248640	HvLEA-28	HORVU.MOREX.r3.3HG0248640.1	569	62042	7.6	59	60	8760	stable	-0.021	chr3H	132317698	132332208
HORVU.MOREX.r3.3HG0257070	HvLEA-29	HORVU.MOREX.r3.3HG0257070.1	419	44614.2	5.3	78	67	6155	unstable	-0.922	chr3H	203720009	203721578
HORVU.MOREX.r3.3HG0267250	HvLEA-30	HORVU.MOREX.r3.3HG0267250.1	288	30032.9	10.35	14	35	4262	unstable	0.051	chr3H	325732534	325733598
HORVU.MOREX.r3.3HG0273460	HvLEA-31	HORVU.MOREX.r3.3HG0273460.1	181	19417	4.45	28	15	2722	stable	-0.107	chr3H	380650894	380651528
HORVU.MOREX.r3.3HG0283230	HvLEA-32	HORVU.MOREX.r3.3HG0283230.1	232	23461.7	6.26	27	23	3231	stable	-0.738	chr3H	452551345	452552148
HORVU.MOREX.r3.3HG0287240	HvLEA-33	HORVU.MOREX.r3.3HG0287240.1	254	27120.7	5.44	29	25	3794	unstable	-0.041	chr3H	475865688	475866452
HORVU.MOREX.r3.3HG0296120	HvLEA-34	HORVU.MOREX.r3.3HG0296120.1	292	31046.7	9.87	18	33	4380	unstable	0.025	chr3H	522826543	522827909
HORVU.MOREX.r3.3HG0300120	HvLEA-35	HORVU.MOREX.r3.3HG0300120.1	241	26396.3	9.66	19	30	3721	unstable	-0.158	chr3H	539684092	539684817
HORVU.MOREX.r3.3HG0305460	HvLEA-36	HORVU.MOREX.r3.3HG0305460.1	295	29175	9.67	17	27	3990	stable	-0.85	chr3H	559007283	559008691
HORVU.MOREX.r3.3HG0315640	HvLEA-37	HORVU.MOREX.r3.3HG0315640.1	204	21227.7	10.03	10	17	3046	unstable	0.56	chr3H	587949039	587949653
HORVU.MOREX.r3.4HG0335550	HvLEA-38	HORVU.MOREX.r3.4HG0335550.1	235	25185.4	9.57	17	25	3606	unstable	0.23	chr4H	11976867	11980201
HORVU.MOREX.r3.4HG0339950	HvLEA-39	HORVU.MOREX.r3.4HG0339950.1	486	46157.1	8.53	26	28	6225	stable	-0.748	chr4H	28394855	28396645
HORVU.MOREX.r3.4HG0350830	HvLEA-40	HORVU.MOREX.r3.4HG0350830.1	300	31473.7	9.67	14	23	4393	unstable	-0.18	chr4H	101802454	101806907
HORVU.MOREX.r3.4HG0353320	HvLEA-41	HORVU.MOREX.r3.4HG0353320.1	232	24688.5	10.38	17	27	3515	unstable	0.08	chr4H	120050196	120050894
HORVU.MOREX.r3.4HG0356870	HvLEA-42	HORVU.MOREX.r3.4HG0356870.1	271	28970.6	10.28	19	36	4123	unstable	-0.004	chr4H	150952657	150953839
HORVU.MOREX.r3.4HG0364700	HvLEA-43	HORVU.MOREX.r3.4HG0364700.1	175	18610.5	7.64	16	17	2627	unstable	0.077	chr4H	234175482	234176009
HORVU.MOREX.r3.4HG0380150	HvLEA-44	HORVU.MOREX.r3.4HG0380150.1	362	38674.3	6.5	65	63	5342	stable	-1.032	chr4H	409827309	409828958
HORVU.MOREX.r3.4HG0390200	HvLEA-45	HORVU.MOREX.r3.4HG0390200.1	241	25507.5	8.93	15	20	3621	unstable	0.32	chr4H	489116426	489117710
HORVU.MOREX.r3.4HG0401690	HvLEA-46	HORVU.MOREX.r3.4HG0401690.1	304	30457.6	5.22	35	29	4236	stable	-0.285	chr4H	557216089	557217379
HORVU.MOREX.r3.4HG0403120	HvLEA-47	HORVU.MOREX.r3.4HG0403120.1	462	46658.5	8.99	76	84	6558	stable	-0.817	chr4H	563356668	563358145
HORVU.MOREX.r3.5HG0424060	HvLEA-48	HORVU.MOREX.r3.5HG0424060.1	223	22519.8	4.95	30	23	3125	unstable	-0.368	chr5H	8593105	8594173
HORVU.MOREX.r3.5HG0424150	HvLEA-49	HORVU.MOREX.r3.5HG0424150.1	136	13940.2	5.58	18	15	1911	unstable	-0.671	chr5H	8758187	8759003
HORVU.MOREX.r3.5HG0446860	HvLEA-50	HORVU.MOREX.r3.5HG0446860.1	208	21999.2	10.34	14	22	3101	unstable	0.035	chr5H	135147795	135148421
HORVU.MOREX.r3.5HG0458100	HvLEA-51	HORVU.MOREX.r3.5HG0458100.1	208	22727	8.6	13	16	3197	stable	0.137	chr5H	267326039	267327253
HORVU.MOREX.r3.5HG0458120	HvLEA-52	HORVU.MOREX.r3.5HG0458120.1	205	22050.6	9.36	15	25	3127	stable	0.156	chr5H	267677988	267678838
HORVU.MOREX.r3.5HG0463010	HvLEA-53	HORVU.MOREX.r3.5HG0463010.1	278	30266	10.4	21	38	4302	unstable	-0.137	chr5H	312211197	312212271
HORVU.MOREX.r3.5HG0470600	HvLEA-54	HORVU.MOREX.r3.5HG0470600.1	209	22708.2	6.98	19	19	3180	stable	0.006	chr5H	369044993	369045985
HORVU.MOREX.r3.5HG0470900	HvLEA-55	HORVU.MOREX.r3.5HG0470900.1	175	17567.2	6.55	23	21	2417	stable	-0.599	chr5H	371467646	371468389
HORVU.MOREX.r3.5HG0470950	HvLEA-56	HORVU.MOREX.r3.5HG0470950.1	104	10572.6	4.8	20	13	1464	stable	-0.5	chr5H	372367010	372367525
HORVU.MOREX.r3.5HG0481100	HvLEA-57	HORVU.MOREX.r3.5HG0481100.1	258	28344	9.41	19	30	4017	unstable	0.129	chr5H	434814387	434815376
HORVU.MOREX.r3.5HG0489910	HvLEA-58	HORVU.MOREX.r3.5HG0489910.1	112	11959.1	6.04	15	13	1647	unstable	-1.016	chr5H	475205581	475205919
HORVU.MOREX.r3.5HG0498820	HvLEA-59	HORVU.MOREX.r3.5HG0498820.1	263	27538.8	9.91	19	34	3902	unstable	0.017	chr5H	499518823	499519715
HORVU.MOREX.r3.5HG0507390	HvLEA-60	HORVU.MOREX.r3.5HG0507390.1	141	14288.5	8.81	18	20	1965	stable	-1.101	chr5H	519209825	519210349
HORVU.MOREX.r3.5HG0507410	HvLEA-61	HORVU.MOREX.r3.5HG0507410.1	139	14235.5	8.81	17	19	1954	unstable	-1.077	chr5H	519237101	519237979
HORVU.MOREX.r3.5HG0510220	HvLEA-62	HORVU.MOREX.r3.5HG0510220.1	105	11220.4	4.8	18	14	1552	unstable	-0.795	chr5H	526312282	526313182
HORVU.MOREX.r3.5HG0516830	HvLEA-63	HORVU.MOREX.r3.5HG0516830.1	146	15127.6	9.52	15	20	2064	stable	-1.151	chr5H	541936194	541937213
HORVU.MOREX.r3.5HG0527260	HvLEA-64	HORVU.MOREX.r3.5HG0527260.1	216	22999.6	9.4	13	20	3246	unstable	0.175	chr5H	565092486	565093400
HORVU.MOREX.r3.5HG0528290	HvLEA-65	HORVU.MOREX.r3.5HG0528290.1	252	27027.6	9.71	16	24	3872	unstable	0.207	chr5H	567593260	567596678
HORVU.MOREX.r3.5HG0530290	HvLEA-66	HORVU.MOREX.r3.5HG0530290.1	219	23389.3	9.11	17	23	3333	stable	0.281	chr5H	571962880	571963806
HORVU.MOREX.r3.5HG0532580	HvLEA-67	HORVU.MOREX.r3.5HG0532580.1	327	36247.1	4.94	61	43	5122	stable	-0.415	chr5H	576518065	576520697
HORVU.MOREX.r3.6HG0548110	HvLEA-68	HORVU.MOREX.r3.6HG0548110.1	141	14223.5	6.59	18	17	1940	stable	-0.887	chr6H	20411130	20411989
HORVU.MOREX.r3.6HG0558740	HvLEA-69	HORVU.MOREX.r3.6HG0558740.1	207	22797.4	8.93	24	30	3237	stable	-0.205	chr6H	59849164	59850069
HORVU.MOREX.r3.6HG0560670	HvLEA-70	HORVU.MOREX.r3.6HG0560670.1	203	21911	8.96	19	23	3085	stable	0.02	chr6H	70548657	70549525
HORVU.MOREX.r3.6HG0569090	HvLEA-71	HORVU.MOREX.r3.6HG0569090.1	220	23858.8	8.82	21	25	3392	unstable	0.16	chr6H	116848614	116849276
HORVU.MOREX.r3.6HG0592430	HvLEA-72	HORVU.MOREX.r3.6HG0592430.1	98	10422.4	9.05	16	18	1434	stable	-1.152	chr6H	342245184	342245798
HORVU.MOREX.r3.6HG0602250	HvLEA-73	HORVU.MOREX.r3.6HG0602250.1	195	21315.9	10.35	12	26	3038	unstable	0.123	chr6H	423320073	423320988
HORVU.MOREX.r3.6HG0602570	HvLEA-74	HORVU.MOREX.r3.6HG0602570.1	336	35863.6	10.19	24	41	4999	unstable	-0.235	chr6H	425204592	425208430
HORVU.MOREX.r3.6HG0602880	HvLEA-75	HORVU.MOREX.r3.6HG0602880.1	254	27597.7	5.15	59	42	3874	unstable	-1.082	chr6H	427730193	427731496
HORVU.MOREX.r3.6HG0622690	HvLEA-76	HORVU.MOREX.r3.6HG0622690.1	204	21133.2	9.73	12	17	3003	unstable	0.272	chr6H	534135201	534135815
HORVU.MOREX.r3.6HG0622710	HvLEA-77	HORVU.MOREX.r3.6HG0622710.1	575	58514.8	6.59	60	49	7900	stable	-1.161	chr6H	534228956	534231085
HORVU.MOREX.r3.6HG0622760	HvLEA-78	HORVU.MOREX.r3.6HG0622760.1	205	20655.3	8.04	16	17	2771	stable	-1.043	chr6H	534378587	534379296
HORVU.MOREX.r3.6HG0622770	HvLEA-79	HORVU.MOREX.r3.6HG0622770.1	155	15684	8.07	16	17	2127	stable	-1.101	chr6H	534387122	534388067
HORVU.MOREX.r3.6HG0622790	HvLEA-80	HORVU.MOREX.r3.6HG0622790.1	191	18996.7	9.1	15	18	2576	stable	-0.942	chr6H	534404316	534405291
HORVU.MOREX.r3.7HG0637810	HvLEA-81	HORVU.MOREX.r3.7HG0637810.1	117	12445.1	9.8	12	20	1742	stable	-0.874	chr7H	6341951	6342650
HORVU.MOREX.r3.7HG0642100	HvLEA-82	HORVU.MOREX.r3.7HG0642100.1	94	10302.8	10.13	10	18	1448	stable	-0.801	chr7H	14373452	14373985
HORVU.MOREX.r3.7HG0644010	HvLEA-83	HORVU.MOREX.r3.7HG0644010.1	90	9703.92	9.65	13	18	1361	stable	-1.007	chr7H	17524681	17525166
HORVU.MOREX.r3.7HG0644030	HvLEA-84	HORVU.MOREX.r3.7HG0644030.1	86	9451.68	9.74	13	19	1331	stable	-1.056	chr7H	17530082	17530342
HORVU.MOREX.r3.7HG0648340	HvLEA-85	HORVU.MOREX.r3.7HG0648340.1	235	25791.7	10.2	17	27	3636	unstable	-0.016	chr7H	26200552	26201259
HORVU.MOREX.r3.7HG0675510	HvLEA-86	HORVU.MOREX.r3.7HG0675510.1	80	8681.7	9.47	16	20	1231	stable	-1.218	chr7H	144153006	144153853
HORVU.MOREX.r3.7HG0683720	HvLEA-87	HORVU.MOREX.r3.7HG0683720.1	219	23548.5	9.41	17	24	3356	unstable	0.217	chr7H	202610511	202611170
HORVU.MOREX.r3.7HG0689310	HvLEA-88	HORVU.MOREX.r3.7HG0689310.1	202	21791	6.14	18	15	3064	unstable	0.12	chr7H	251238131	251238898
HORVU.MOREX.r3.7HG0707700	HvLEA-89	HORVU.MOREX.r3.7HG0707700.1	216	23769.6	9.22	12	19	3373	unstable	0.292	chr7H	444375596	444377067
HORVU.MOREX.r3.7HG0707750	HvLEA-90	HORVU.MOREX.r3.7HG0707750.1	213	23311.1	7.59	16	17	3281	unstable	0.322	chr7H	444521125	444521766
HORVU.MOREX.r3.7HG0711550	HvLEA-91	HORVU.MOREX.r3.7HG0711550.1	274	28073.8	4.29	42	21	3875	stable	-0.325	chr7H	473115570	473116758
HORVU.MOREX.r3.7HG0730410	HvLEA-92	HORVU.MOREX.r3.7HG0730410.1	147	14313.7	9.64	13	17	1964	stable	-0.534	chr7H	577875407	577875850
HORVU.MOREX.r3.7HG0749500	HvLEA-93	HORVU.MOREX.r3.7HG0749500.1	211	22659.8	9.02	12	17	3176	stable	0.027	chr7H	623249624	623250536

## Sheet: Table S2
Table S2. Orthologous relationships of H. vulgare with Z. mays, S. lycopersicum and A. thaliana
H. vulgare	Z. mays
HvSnRK-1	transcript:Zm00001eb272410_T002
HvSnRK-1	transcript:Zm00001eb318330_T001
HvSnRK-10	transcript:Zm00001eb428080_T002
HvSnRK-10	transcript:Zm00001eb072810_T001
HvSnRK-10	transcript:Zm00001eb190570_T003
HvSnRK-10	transcript:Zm00001eb230910_T003
HvSnRK-11	transcript:Zm00001eb232690_T001
HvSnRK-12	transcript:Zm00001eb058470_T002
HvSnRK-12	transcript:Zm00001eb060110_T001
HvSnRK-12	transcript:Zm00001eb060140_T001
HvSnRK-14	transcript:Zm00001eb061860_T001
HvSnRK-14	transcript:Zm00001eb041140_T001
HvSnRK-15	transcript:Zm00001eb051510_T001
HvSnRK-15	transcript:Zm00001eb406220_T001
HvSnRK-15	transcript:Zm00001eb102690_T001
HvSnRK-17	transcript:Zm00001eb093410_T001
HvSnRK-17	transcript:Zm00001eb099440_T001
HvSnRK-17	transcript:Zm00001eb117300_T001
HvSnRK-18	transcript:Zm00001eb135610_T001
HvSnRK-18	transcript:Zm00001eb135610_T001
HvSnRK-19	transcript:Zm00001eb150340_T001
HvSnRK-20	transcript:Zm00001eb179790_T001
HvSnRK-20	transcript:Zm00001eb195230_T001
HvSnRK-21	transcript:Zm00001eb196210_T001
HvSnRK-21	transcript:Zm00001eb219160_T001
HvSnRK-22	transcript:Zm00001eb214180_T002
HvSnRK-24	transcript:Zm00001eb212430_T001
HvSnRK-25	transcript:Zm00001eb318330_T001
HvSnRK-25	transcript:Zm00001eb312910_T002
HvSnRK-28	transcript:Zm00001eb312900_T001
HvSnRK-29	transcript:Zm00001eb013270_T002
HvSnRK-3	transcript:Zm00001eb015210_T004
HvSnRK-3	transcript:Zm00001eb001940_T002
HvSnRK-30	transcript:Zm00001eb002180_T002
HvSnRK-31	transcript:Zm00001eb051510_T001
HvSnRK-32	transcript:Zm00001eb408020_T001
HvSnRK-32	transcript:Zm00001eb406220_T001
HvSnRK-32	transcript:Zm00001eb091710_T003
HvSnRK-33	transcript:Zm00001eb139060_T001
HvSnRK-33	transcript:Zm00001eb195230_T001
HvSnRK-35	transcript:Zm00001eb196210_T001
HvSnRK-35	transcript:Zm00001eb200920_T001
HvSnRK-36	transcript:Zm00001eb196030_T005
HvSnRK-36	transcript:Zm00001eb197050_T001
HvSnRK-37	transcript:Zm00001eb219160_T001
HvSnRK-38	transcript:Zm00001eb331220_T002
HvSnRK-38	transcript:Zm00001eb403620_T001
HvSnRK-38	transcript:Zm00001eb146500_T003
HvSnRK-39	transcript:Zm00001eb155430_T002
HvSnRK-39	transcript:Zm00001eb159530_T001
HvSnRK-4	transcript:Zm00001eb149390_T003
HvSnRK-44	transcript:Zm00001eb150340_T001
HvSnRK-44	transcript:Zm00001eb152500_T001
HvSnRK-45	transcript:Zm00001eb162810_T004
HvSnRK-45	transcript:Zm00001eb289970_T001
HvSnRK-45	transcript:Zm00001eb293240_T002
HvSnRK-45	transcript:Zm00001eb294480_T001
HvSnRK-47	transcript:Zm00001eb289200_T001
HvSnRK-47	transcript:Zm00001eb358560_T001
HvSnRK-47	transcript:Zm00001eb366610_T005
HvSnRK-48	transcript:Zm00001eb368360_T001
HvSnRK-49	transcript:Zm00001eb369270_T001
HvSnRK-50	transcript:Zm00001eb370550_T003
HvSnRK-50	transcript:Zm00001eb370540_T001
HvSnRK-51	transcript:Zm00001eb344900_T001
HvSnRK-52	transcript:Zm00001eb338230_T001
HvSnRK-53	transcript:Zm00001eb338250_T002
HvSnRK-53	transcript:Zm00001eb015210_T004
HvSnRK-54	transcript:Zm00001eb016180_T001
HvSnRK-55	transcript:Zm00001eb017850_T002
HvSnRK-55	transcript:Zm00001eb429270_T001
HvSnRK-59	transcript:Zm00001eb428080_T002
HvSnRK-59	transcript:Zm00001eb434400_T001
HvSnRK-59	transcript:Zm00001eb117300_T001
HvSnRK-6	transcript:Zm00001eb110020_T001
HvSnRK-6	transcript:Zm00001eb107190_T001
HvSnRK-60	transcript:Zm00001eb109500_T002
HvSnRK-60	transcript:Zm00001eb072810_T001
HvSnRK-62	transcript:Zm00001eb110250_T001
HvSnRK-62	transcript:Zm00001eb111520_T001
HvSnRK-62	transcript:Zm00001eb331220_T002
HvSnRK-63	transcript:Zm00001eb330600_T001
HvSnRK-63	transcript:Zm00001eb328990_T001
HvSnRK-65	transcript:Zm00001eb328710_T002
HvSnRK-65	transcript:Zm00001eb327780_T002
HvSnRK-66	transcript:Zm00001eb327690_T001
HvSnRK-67	transcript:Zm00001eb324690_T001
HvSnRK-67	transcript:Zm00001eb043750_T002
HvSnRK-68	transcript:Zm00001eb023880_T001
HvSnRK-68	transcript:Zm00001eb417440_T001
HvSnRK-69	transcript:Zm00001eb159530_T001
HvSnRK-7	transcript:Zm00001eb146500_T003
HvSnRK-70	transcript:Zm00001eb150340_T001
HvSnRK-70	transcript:Zm00001eb149390_T003
HvSnRK-71	transcript:Zm00001eb152500_T001
HvSnRK-72	transcript:Zm00001eb155430_T002
HvSnRK-75	transcript:Zm00001eb129820_T001
HvSnRK-75	transcript:Zm00001eb220460_T002
HvSnRK-76	transcript:Zm00001eb293240_T002
HvSnRK-77	transcript:Zm00001eb289970_T001
HvSnRK-78	transcript:Zm00001eb294480_T001
HvSnRK-78	transcript:Zm00001eb292760_T001
HvSnRK-78	transcript:Zm00001eb289200_T001
HvSnRK-8	transcript:Zm00001eb344900_T001
HvSnRK-8	transcript:Zm00001eb366610_T005
HvSnRK-81	transcript:Zm00001eb353170_T002
HvSnRK-81	transcript:Zm00001eb369270_T001
HvSnRK-9	transcript:Zm00001eb368360_T001
HvSnRK-9	transcript:Zm00001eb358560_T001
HvSnRK-9	transcript:Zm00001eb370540_T001
HvLEA-90	transcript:Zm00001eb434140_T001
HvLEA-89	transcript:Zm00001eb434170_T001
HvLEA-90	transcript:Zm00001eb065640_T001
HvLEA-90	transcript:Zm00001eb259940_T001
HvLEA-89	transcript:Zm00001eb259950_T001
HvLEA-86	transcript:Zm00001eb381840_T001
HvLEA-75	transcript:Zm00001eb187010_T001
HvLEA-73	transcript:Zm00001eb249980_T001
HvLEA-75	transcript:Zm00001eb250120_T001
HvLEA-62	transcript:Zm00001eb057120_T001
HvLEA-66	transcript:Zm00001eb063730_T001
HvLEA-67	transcript:Zm00001eb064120_T003
HvLEA-53	transcript:Zm00001eb405330_T001
HvLEA-51	transcript:Zm00001eb407150_T001
HvLEA-57	transcript:Zm00001eb099990_T001
HvLEA-52	transcript:Zm00001eb139560_T001
HvLEA-55	transcript:Zm00001eb308610_T001
HvLEA-59	transcript:Zm00001eb319570_T001
HvLEA-38	transcript:Zm00001eb053810_T001
HvLEA-46	transcript:Zm00001eb004470_T001
HvLEA-47	transcript:Zm00001eb005250_T001
HvLEA-46	transcript:Zm00001eb047600_T001
HvLEA-45	transcript:Zm00001eb011530_T002
HvLEA-42	transcript:Zm00001eb405330_T001
HvLEA-40	transcript:Zm00001eb092240_T001
HvLEA-41	transcript:Zm00001eb093800_T001
HvLEA-38	transcript:Zm00001eb216980_T002
HvLEA-44	transcript:Zm00001eb395500_T001
HvLEA-35	transcript:Zm00001eb146910_T001
HvLEA-30	transcript:Zm00001eb160190_T001
HvLEA-32	transcript:Zm00001eb155620_T001
HvLEA-31	transcript:Zm00001eb159430_T001
HvLEA-34	transcript:Zm00001eb150110_T001
HvLEA-33	transcript:Zm00001eb153970_T001
HvLEA-31	transcript:Zm00001eb358640_T001
HvLEA-35	transcript:Zm00001eb366760_T001
HvLEA-29	transcript:Zm00001eb332740_T001
HvLEA-31	transcript:Zm00001eb344820_T001
HvLEA-33	transcript:Zm00001eb353610_T001
HvLEA-30	transcript:Zm00001eb357160_T001
HvLEA-17	transcript:Zm00001eb422110_T001
HvLEA-18	transcript:Zm00001eb422500_T003
HvLEA-19	transcript:Zm00001eb428350_T001
HvLEA-17	transcript:Zm00001eb407150_T001
HvLEA-25	transcript:Zm00001eb434140_T001
HvLEA-24	transcript:Zm00001eb434170_T001
HvLEA-23	transcript:Zm00001eb066210_T001
HvLEA-25	transcript:Zm00001eb065640_T001
HvLEA-14	transcript:Zm00001eb106190_T001
HvLEA-18	transcript:Zm00001eb082820_T001
HvLEA-17	transcript:Zm00001eb083540_T001
HvLEA-13	transcript:Zm00001eb106290_T001
HvLEA-17	transcript:Zm00001eb243040_T001
HvLEA-13	transcript:Zm00001eb323160_T001
HvLEA-2	transcript:Zm00001eb044970_T001
HvLEA-9	transcript:Zm00001eb159430_T001
HvLEA-8	transcript:Zm00001eb153970_T001
HvLEA-2	transcript:Zm00001eb221020_T001
HvLEA-4	transcript:Zm00001eb285480_T001
HvLEA-9	transcript:Zm00001eb358640_T001
HvLEA-8	transcript:Zm00001eb353610_T001
H. vulgare	S. lycopersicum
HvSnRK-79	transcript:Solyc02g072530.2.1
HvSnRK-16	transcript:Solyc01g006840.3.1
HvSnRK-19	transcript:Solyc02g090390.3.1
HvSnRK-24	transcript:Solyc09g083090.3.1
HvSnRK-33	transcript:Solyc02g072530.2.1
HvSnRK-4	transcript:Solyc04g074500.3.1
HvSnRK-66	transcript:Solyc04g081920.3.1
HvSnRK-67	transcript:Solyc06g082440.1.1
HvSnRK-68	transcript:Solyc08g077780.3.1
HvLEA-51	transcript:Solyc01g007220.3.1
HvLEA-52	transcript:Solyc01g007230.3.1
HvLEA-51	transcript:Solyc10g081955.1.1
HvLEA-52	transcript:Solyc10g081970.2.1
HvLEA-51	transcript:Solyc11g068890.1.1
HvLEA-62	transcript:Solyc09g082100.3.1
HvLEA-40	transcript:Solyc10g081980.2.1
HvLEA-46	transcript:Solyc09g082100.3.1
HvLEA-46	transcript:Solyc09g065360.3.1
HvLEA-35	transcript:Solyc01g007240.3.1
HvLEA-31	transcript:Solyc01g095140.3.1
HvLEA-35	transcript:Solyc11g068900.1.1
HvLEA-28	transcript:Solyc03g120670.3.1
HvLEA-24	transcript:Solyc01g007220.3.1
HvLEA-25	transcript:Solyc01g007230.3.1
HvLEA-17	transcript:Solyc01g007220.3.1
HvLEA-17	transcript:Solyc10g081955.1.1
HvLEA-17	transcript:Solyc11g068890.1.1
HvLEA-9	transcript:Solyc01g095140.3.1
HvLEA-5	transcript:Solyc10g074730.2.1
H. vulgare	A. thaliana
HvSnRK-1	PAC:19673187
HvSnRK-19	PAC:19662798
HvSnRK-24	PAC:19662798
HvSnRK-37	PAC:19645493
HvSnRK-54	PAC:19665675
HvSnRK-60	PAC:19665675
HvSnRK-66	PAC:19654848
HvSnRK-66	PAC:19656335
HvSnRK-7	PAC:19650485
HvSnRK-7	PAC:19672183
HvSnRK-74	PAC:19665675
HvLEA-51	PAC:19638664
HvLEA-52	PAC:19641759
HvLEA-62	PAC:19661744
HvLEA-46	PAC:19661744
HvLEA-17	PAC:19638664
HvLEA-17	PAC:19660658

## Sheet: Sheet2
Sheet 2. Domain analyses of SNF1-related kinase (SnRK)
Query	Hit type	PSSM-ID	From	To	E-Value	Bitscore	Accession	Short name	Incomplete	Superfamily
Q#1 - >HORVU.MOREX.r3.6HG0551960.1.V3	specific	459660	46	306	4.13647e-69	218.652	pfam00069	Pkinase	-	cl47491
Q#1 - >HORVU.MOREX.r3.6HG0551960.1.V3	superfamily	459660	46	306	4.13647e-69	218.652	cl47491	Pkinase superfamily	-	-
Q#1 - >HORVU.MOREX.r3.6HG0551960.1.V3	non-specific	462242	49	252	3.73571e-25	102.575	pfam07714	PK_Tyr_Ser-Thr	-	cl47985
Q#1 - >HORVU.MOREX.r3.6HG0551960.1.V3	superfamily	462242	49	252	3.73571e-25	102.575	cl47985	PK_Tyr_Ser-Thr superfamily	-	-
Q#1 - >HORVU.MOREX.r3.6HG0551960.1.V3	specific	463900	432	488	2.10808e-10	54.5669	pfam13499	EF-hand_7	-	cl38414
Q#1 - >HORVU.MOREX.r3.6HG0551960.1.V3	superfamily	463900	432	488	2.10808e-10	54.5669	cl38414	EF-hand_7 superfamily	-	-
Q#1 - >HORVU.MOREX.r3.6HG0551960.1.V3	specific	463900	353	416	8.35081e-09	50.3297	pfam13499	EF-hand_7	-	cl38414
Q#1 - >HORVU.MOREX.r3.6HG0551960.1.V3	superfamily	463900	353	416	8.35081e-09	50.3297	cl38414	EF-hand_7 superfamily	-	-
Q#1 - >HORVU.MOREX.r3.6HG0551960.1.V3	non-specific	405254	132	269	2.33014e-06	47.4911	pfam14531	Kinase-like	N	cl26012
Q#1 - >HORVU.MOREX.r3.6HG0551960.1.V3	superfamily	405254	132	269	2.33014e-06	47.4911	cl26012	Kinase-like superfamily	N	-
Q#1 - >HORVU.MOREX.r3.6HG0551960.1.V3	non-specific	433035	434	454	0.000217892	36.5285	pfam13202	EF-hand_5	-	cl23632
Q#1 - >HORVU.MOREX.r3.6HG0551960.1.V3	superfamily	433035	434	454	0.000217892	36.5285	cl23632	EF-hand_5 superfamily	-	-
Q#1 - >HORVU.MOREX.r3.6HG0551960.1.V3	non-specific	425435	432	454	0.000396099	35.8394	pfam00036	EF-hand_1	C	cl37953
Q#1 - >HORVU.MOREX.r3.6HG0551960.1.V3	superfamily	425435	432	454	0.000396099	35.8394	cl37953	EF-hand_1 superfamily	C	-
Q#1 - >HORVU.MOREX.r3.6HG0551960.1.V3	non-specific	433035	354	375	0.000450455	35.7581	pfam13202	EF-hand_5	-	cl23632
Q#1 - >HORVU.MOREX.r3.6HG0551960.1.V3	superfamily	433035	354	375	0.000450455	35.7581	cl23632	EF-hand_5 superfamily	-	-
Q#1 - >HORVU.MOREX.r3.6HG0551960.1.V3	non-specific	463869	353	380	0.000455897	35.6152	pfam13405	EF-hand_6	-	cl38409
Q#1 - >HORVU.MOREX.r3.6HG0551960.1.V3	superfamily	463869	353	380	0.000455897	35.6152	cl38409	EF-hand_6 superfamily	-	-
Q#1 - >HORVU.MOREX.r3.6HG0551960.1.V3	non-specific	463869	434	454	0.000991451	34.8448	pfam13405	EF-hand_6	C	cl38409
Q#1 - >HORVU.MOREX.r3.6HG0551960.1.V3	superfamily	463869	434	454	0.000991451	34.8448	cl38409	EF-hand_6 superfamily	C	-
Q#1 - >HORVU.MOREX.r3.6HG0551960.1.V3	non-specific	433035	463	487	0.00279895	33.4469	pfam13202	EF-hand_5	-	cl23632
Q#1 - >HORVU.MOREX.r3.6HG0551960.1.V3	non-specific	404678	444	487	0.00287487	34.2129	pfam13833	EF-hand_8	-	cl08302
Q#1 - >HORVU.MOREX.r3.6HG0551960.1.V3	superfamily	415501	444	487	0.00287487	34.2129	cl08302	EFh superfamily	-	-
Q#1 - >HORVU.MOREX.r3.6HG0551960.1.V3	non-specific	425435	466	489	0.00303303	33.5282	pfam00036	EF-hand_1	-	cl37953
Q#1 - >HORVU.MOREX.r3.6HG0551960.1.V3	non-specific	404678	365	417	0.00562581	33.4425	pfam13833	EF-hand_8	-	cl08302
Q#1 - >HORVU.MOREX.r3.6HG0551960.1.V3	superfamily	415501	365	417	0.00562581	33.4425	cl08302	EFh superfamily	-	-
Q#2 - >HORVU.MOREX.r3.6HG0565350.1.V3	specific	459660	12	266	9.89156e-66	209.022	pfam00069	Pkinase	-	cl47491
Q#2 - >HORVU.MOREX.r3.6HG0565350.1.V3	superfamily	459660	12	266	9.89156e-66	209.022	cl47491	Pkinase superfamily	-	-
Q#2 - >HORVU.MOREX.r3.6HG0565350.1.V3	non-specific	462242	13	262	6.6188e-40	142.25	pfam07714	PK_Tyr_Ser-Thr	-	cl47985
Q#2 - >HORVU.MOREX.r3.6HG0565350.1.V3	superfamily	462242	13	262	6.6188e-40	142.25	cl47985	PK_Tyr_Ser-Thr superfamily	-	-
Q#2 - >HORVU.MOREX.r3.6HG0565350.1.V3	specific	427528	313	354	5.19734e-18	75.5999	pfam03822	NAF	C	cl17070
Q#2 - >HORVU.MOREX.r3.6HG0565350.1.V3	superfamily	473060	313	354	5.19734e-18	75.5999	cl17070	AMPKA_C_like superfamily	C	-
Q#2 - >HORVU.MOREX.r3.6HG0565350.1.V3	non-specific	405254	18	254	1.09169e-08	54.4247	pfam14531	Kinase-like	-	cl26012
Q#2 - >HORVU.MOREX.r3.6HG0565350.1.V3	superfamily	405254	18	254	1.09169e-08	54.4247	cl26012	Kinase-like superfamily	-	-
Q#2 - >HORVU.MOREX.r3.6HG0565350.1.V3	non-specific	432484	5	162	0.00354261	37.469	pfam12330	Haspin_kinase	NC	cl21453
Q#2 - >HORVU.MOREX.r3.6HG0565350.1.V3	superfamily	473864	5	162	0.00354261	37.469	cl21453	PKc_like superfamily	NC	-
Q#3 - >HORVU.MOREX.r3.6HG0569870.1.V3	specific	459660	10	263	3.46671e-62	199.007	pfam00069	Pkinase	-	cl47491
Q#3 - >HORVU.MOREX.r3.6HG0569870.1.V3	superfamily	459660	10	263	3.46671e-62	199.007	cl47491	Pkinase superfamily	-	-
Q#3 - >HORVU.MOREX.r3.6HG0569870.1.V3	non-specific	462242	13	230	1.48565e-40	143.791	pfam07714	PK_Tyr_Ser-Thr	-	cl47985
Q#3 - >HORVU.MOREX.r3.6HG0569870.1.V3	superfamily	462242	13	230	1.48565e-40	143.791	cl47985	PK_Tyr_Ser-Thr superfamily	-	-
Q#3 - >HORVU.MOREX.r3.6HG0569870.1.V3	non-specific	427143	71	155	6.80238e-08	51.4656	pfam03109	ABC1	N	cl21453
Q#3 - >HORVU.MOREX.r3.6HG0569870.1.V3	superfamily	473864	71	155	6.80238e-08	51.4656	cl21453	PKc_like superfamily	N	-
Q#3 - >HORVU.MOREX.r3.6HG0569870.1.V3	non-specific	427528	313	364	2.9424e-07	45.1692	pfam03822	NAF	-	cl17070
Q#3 - >HORVU.MOREX.r3.6HG0569870.1.V3	superfamily	473060	313	364	2.9424e-07	45.1692	cl17070	AMPKA_C_like superfamily	-	-
Q#3 - >HORVU.MOREX.r3.6HG0569870.1.V3	non-specific	405254	116	209	3.37097e-05	43.6391	pfam14531	Kinase-like	N	cl26012
Q#3 - >HORVU.MOREX.r3.6HG0569870.1.V3	superfamily	405254	116	209	3.37097e-05	43.6391	cl26012	Kinase-like superfamily	N	-
Q#4 - >HORVU.MOREX.r3.6HG0633900.1.V3	specific	459660	82	358	4.31472e-71	225.586	pfam00069	Pkinase	-	cl47491
Q#4 - >HORVU.MOREX.r3.6HG0633900.1.V3	superfamily	459660	82	358	4.31472e-71	225.586	cl47491	Pkinase superfamily	-	-
Q#4 - >HORVU.MOREX.r3.6HG0633900.1.V3	non-specific	462242	84	315	1.16594e-16	77.922	pfam07714	PK_Tyr_Ser-Thr	-	cl47985
Q#4 - >HORVU.MOREX.r3.6HG0633900.1.V3	superfamily	462242	84	315	1.16594e-16	77.922	cl47985	PK_Tyr_Ser-Thr superfamily	-	-
Q#4 - >HORVU.MOREX.r3.6HG0633900.1.V3	specific	463900	476	538	3.8107e-16	71.1305	pfam13499	EF-hand_7	-	cl38414
Q#4 - >HORVU.MOREX.r3.6HG0633900.1.V3	superfamily	463900	476	538	3.8107e-16	71.1305	cl38414	EF-hand_7 superfamily	-	-
Q#4 - >HORVU.MOREX.r3.6HG0633900.1.V3	specific	463900	406	467	2.81981e-13	63.0413	pfam13499	EF-hand_7	-	cl38414
Q#4 - >HORVU.MOREX.r3.6HG0633900.1.V3	superfamily	463900	406	467	2.81981e-13	63.0413	cl38414	EF-hand_7 superfamily	-	-
Q#4 - >HORVU.MOREX.r3.6HG0633900.1.V3	non-specific	404678	417	469	1.04561e-09	52.3173	pfam13833	EF-hand_8	-	cl08302
Q#4 - >HORVU.MOREX.r3.6HG0633900.1.V3	superfamily	415501	417	469	1.04561e-09	52.3173	cl08302	EFh superfamily	-	-
Q#4 - >HORVU.MOREX.r3.6HG0633900.1.V3	non-specific	404678	490	539	2.92263e-08	48.4653	pfam13833	EF-hand_8	-	cl08302
Q#4 - >HORVU.MOREX.r3.6HG0633900.1.V3	superfamily	415501	490	539	2.92263e-08	48.4653	cl08302	EFh superfamily	-	-
Q#4 - >HORVU.MOREX.r3.6HG0633900.1.V3	non-specific	463900	440	504	4.11506e-08	48.4037	pfam13499	EF-hand_7	-	cl38414
Q#4 - >HORVU.MOREX.r3.6HG0633900.1.V3	superfamily	463900	440	504	4.11506e-08	48.4037	cl38414	EF-hand_7 superfamily	-	-
Q#4 - >HORVU.MOREX.r3.6HG0633900.1.V3	non-specific	425435	513	539	2.0024e-07	45.4694	pfam00036	EF-hand_1	-	cl37953
Q#4 - >HORVU.MOREX.r3.6HG0633900.1.V3	superfamily	425435	513	539	2.0024e-07	45.4694	cl37953	EF-hand_1 superfamily	-	-
Q#4 - >HORVU.MOREX.r3.6HG0633900.1.V3	non-specific	425435	406	432	1.86894e-06	42.773	pfam00036	EF-hand_1	-	cl37953
Q#4 - >HORVU.MOREX.r3.6HG0633900.1.V3	superfamily	425435	406	432	1.86894e-06	42.773	cl37953	EF-hand_1 superfamily	-	-
Q#4 - >HORVU.MOREX.r3.6HG0633900.1.V3	non-specific	463869	406	434	1.19482e-05	40.2376	pfam13405	EF-hand_6	-	cl38409
Q#4 - >HORVU.MOREX.r3.6HG0633900.1.V3	superfamily	463869	406	434	1.19482e-05	40.2376	cl38409	EF-hand_6 superfamily	-	-
Q#4 - >HORVU.MOREX.r3.6HG0633900.1.V3	non-specific	463869	479	507	3.28328e-05	39.082	pfam13405	EF-hand_6	-	cl38409
Q#4 - >HORVU.MOREX.r3.6HG0633900.1.V3	superfamily	463869	479	507	3.28328e-05	39.082	cl38409	EF-hand_6 superfamily	-	-
Q#4 - >HORVU.MOREX.r3.6HG0633900.1.V3	non-specific	425435	442	466	0.000134667	37.3802	pfam00036	EF-hand_1	-	cl37953
Q#4 - >HORVU.MOREX.r3.6HG0633900.1.V3	non-specific	425435	478	505	0.000245186	36.6098	pfam00036	EF-hand_1	-	cl37953
Q#4 - >HORVU.MOREX.r3.6HG0633900.1.V3	non-specific	433035	406	428	0.000262887	36.5285	pfam13202	EF-hand_5	-	cl23632
Q#4 - >HORVU.MOREX.r3.6HG0633900.1.V3	superfamily	433035	406	428	0.000262887	36.5285	cl23632	EF-hand_5 superfamily	-	-
Q#4 - >HORVU.MOREX.r3.6HG0633900.1.V3	non-specific	433035	513	537	0.00228017	33.8321	pfam13202	EF-hand_5	-	cl23632
Q#4 - >HORVU.MOREX.r3.6HG0633900.1.V3	superfamily	433035	513	537	0.00228017	33.8321	cl23632	EF-hand_5 superfamily	-	-
Q#4 - >HORVU.MOREX.r3.6HG0633900.1.V3	non-specific	404678	386	433	0.0040049	33.8277	pfam13833	EF-hand_8	-	cl08302
Q#4 - >HORVU.MOREX.r3.6HG0633900.1.V3	non-specific	433035	479	500	0.00591567	32.6765	pfam13202	EF-hand_5	-	cl23632
Q#5 - >HORVU.MOREX.r3.6HG0565330.1.V3	specific	459660	362	614	9.46966e-53	180.903	pfam00069	Pkinase	-	cl47491
Q#5 - >HORVU.MOREX.r3.6HG0565330.1.V3	superfamily	459660	362	614	9.46966e-53	180.903	cl47491	Pkinase superfamily	-	-
Q#5 - >HORVU.MOREX.r3.6HG0565330.1.V3	non-specific	462242	41	305	8.76465e-47	165.748	pfam07714	PK_Tyr_Ser-Thr	-	cl47985
Q#5 - >HORVU.MOREX.r3.6HG0565330.1.V3	superfamily	462242	41	305	8.76465e-47	165.748	cl47985	PK_Tyr_Ser-Thr superfamily	-	-
Q#5 - >HORVU.MOREX.r3.6HG0565330.1.V3	non-specific	462242	363	609	7.24471e-30	117.212	pfam07714	PK_Tyr_Ser-Thr	-	cl47985
Q#5 - >HORVU.MOREX.r3.6HG0565330.1.V3	superfamily	462242	363	609	7.24471e-30	117.212	cl47985	PK_Tyr_Ser-Thr superfamily	-	-
Q#5 - >HORVU.MOREX.r3.6HG0565330.1.V3	non-specific	459660	42	303	2.91572e-24	99.6257	pfam00069	Pkinase	-	cl47491
Q#5 - >HORVU.MOREX.r3.6HG0565330.1.V3	superfamily	459660	42	303	2.91572e-24	99.6257	cl47491	Pkinase superfamily	-	-
Q#5 - >HORVU.MOREX.r3.6HG0565330.1.V3	non-specific	405254	458	563	3.11139e-05	44.7947	pfam14531	Kinase-like	N	cl26012
Q#5 - >HORVU.MOREX.r3.6HG0565330.1.V3	superfamily	405254	458	563	3.11139e-05	44.7947	cl26012	Kinase-like superfamily	N	-
Q#5 - >HORVU.MOREX.r3.6HG0565330.1.V3	non-specific	432484	434	517	0.00265402	39.0098	pfam12330	Haspin_kinase	NC	cl21453
Q#5 - >HORVU.MOREX.r3.6HG0565330.1.V3	superfamily	473864	434	517	0.00265402	39.0098	cl21453	PKc_like superfamily	NC	-
Q#6 - >HORVU.MOREX.r3.6HG0604810.1.V3	specific	459660	89	347	7.03096e-75	234.831	pfam00069	Pkinase	-	cl47491
Q#6 - >HORVU.MOREX.r3.6HG0604810.1.V3	superfamily	459660	89	347	7.03096e-75	234.831	cl47491	Pkinase superfamily	-	-
Q#6 - >HORVU.MOREX.r3.6HG0604810.1.V3	non-specific	462242	91	304	3.22704e-23	97.182	pfam07714	PK_Tyr_Ser-Thr	-	cl47985
Q#6 - >HORVU.MOREX.r3.6HG0604810.1.V3	superfamily	462242	91	304	3.22704e-23	97.182	cl47985	PK_Tyr_Ser-Thr superfamily	-	-
Q#6 - >HORVU.MOREX.r3.6HG0604810.1.V3	specific	463900	464	526	1.07466e-13	64.1969	pfam13499	EF-hand_7	-	cl38414
Q#6 - >HORVU.MOREX.r3.6HG0604810.1.V3	superfamily	463900	464	526	1.07466e-13	64.1969	cl38414	EF-hand_7 superfamily	-	-
Q#6 - >HORVU.MOREX.r3.6HG0604810.1.V3	specific	463900	395	456	2.37537e-12	60.3449	pfam13499	EF-hand_7	-	cl38414
Q#6 - >HORVU.MOREX.r3.6HG0604810.1.V3	superfamily	463900	395	456	2.37537e-12	60.3449	cl38414	EF-hand_7 superfamily	-	-
Q#6 - >HORVU.MOREX.r3.6HG0604810.1.V3	non-specific	463900	428	492	2.50192e-08	48.7889	pfam13499	EF-hand_7	-	cl38414
Q#6 - >HORVU.MOREX.r3.6HG0604810.1.V3	superfamily	463900	428	492	2.50192e-08	48.7889	cl38414	EF-hand_7 superfamily	-	-
Q#6 - >HORVU.MOREX.r3.6HG0604810.1.V3	non-specific	425435	395	421	1.39847e-06	42.773	pfam00036	EF-hand_1	-	cl37953
Q#6 - >HORVU.MOREX.r3.6HG0604810.1.V3	superfamily	425435	395	421	1.39847e-06	42.773	cl37953	EF-hand_1 superfamily	-	-
Q#6 - >HORVU.MOREX.r3.6HG0604810.1.V3	non-specific	404678	407	458	1.65211e-06	43.4577	pfam13833	EF-hand_8	-	cl08302
Q#6 - >HORVU.MOREX.r3.6HG0604810.1.V3	superfamily	415501	407	458	1.65211e-06	43.4577	cl08302	EFh superfamily	-	-
Q#6 - >HORVU.MOREX.r3.6HG0604810.1.V3	non-specific	463869	467	495	9.5724e-06	40.6228	pfam13405	EF-hand_6	-	cl38409
Q#6 - >HORVU.MOREX.r3.6HG0604810.1.V3	superfamily	463869	467	495	9.5724e-06	40.6228	cl38409	EF-hand_6 superfamily	-	-
Q#6 - >HORVU.MOREX.r3.6HG0604810.1.V3	non-specific	463869	395	423	1.17625e-05	40.2376	pfam13405	EF-hand_6	-	cl38409
Q#6 - >HORVU.MOREX.r3.6HG0604810.1.V3	superfamily	463869	395	423	1.17625e-05	40.2376	cl38409	EF-hand_6 superfamily	-	-
Q#6 - >HORVU.MOREX.r3.6HG0604810.1.V3	non-specific	404678	478	527	2.39254e-05	39.9909	pfam13833	EF-hand_8	-	cl08302
Q#6 - >HORVU.MOREX.r3.6HG0604810.1.V3	superfamily	415501	478	527	2.39254e-05	39.9909	cl08302	EFh superfamily	-	-
Q#6 - >HORVU.MOREX.r3.6HG0604810.1.V3	non-specific	425435	501	527	4.08126e-05	38.921	pfam00036	EF-hand_1	-	cl37953
Q#6 - >HORVU.MOREX.r3.6HG0604810.1.V3	superfamily	425435	501	527	4.08126e-05	38.921	cl37953	EF-hand_1 superfamily	-	-
Q#6 - >HORVU.MOREX.r3.6HG0604810.1.V3	non-specific	425435	466	493	0.000101698	37.7654	pfam00036	EF-hand_1	-	cl37953
Q#6 - >HORVU.MOREX.r3.6HG0604810.1.V3	non-specific	405254	174	330	0.000216724	41.3279	pfam14531	Kinase-like	N	cl26012
Q#6 - >HORVU.MOREX.r3.6HG0604810.1.V3	superfamily	405254	174	330	0.000216724	41.3279	cl26012	Kinase-like superfamily	N	-
Q#6 - >HORVU.MOREX.r3.6HG0604810.1.V3	non-specific	433035	467	489	0.000354359	36.1433	pfam13202	EF-hand_5	-	cl23632
Q#6 - >HORVU.MOREX.r3.6HG0604810.1.V3	superfamily	433035	467	489	0.000354359	36.1433	cl23632	EF-hand_5 superfamily	-	-
Q#6 - >HORVU.MOREX.r3.6HG0604810.1.V3	non-specific	433035	395	419	0.00125752	34.6025	pfam13202	EF-hand_5	-	cl23632
Q#6 - >HORVU.MOREX.r3.6HG0604810.1.V3	superfamily	433035	395	419	0.00125752	34.6025	cl23632	EF-hand_5 superfamily	-	-
Q#6 - >HORVU.MOREX.r3.6HG0604810.1.V3	non-specific	425435	430	454	0.0020991	33.9134	pfam00036	EF-hand_1	-	cl37953
Q#6 - >HORVU.MOREX.r3.6HG0604810.1.V3	non-specific	404678	375	422	0.00326422	34.2129	pfam13833	EF-hand_8	-	cl08302
Q#7 - >HORVU.MOREX.r3.2HG0108670.1.V3	specific	459660	36	290	1.85556e-58	190.533	pfam00069	Pkinase	-	cl47491
Q#7 - >HORVU.MOREX.r3.2HG0108670.1.V3	superfamily	459660	36	290	1.85556e-58	190.533	cl47491	Pkinase superfamily	-	-
Q#7 - >HORVU.MOREX.r3.2HG0108670.1.V3	non-specific	462242	37	248	1.39308e-35	131.08	pfam07714	PK_Tyr_Ser-Thr	-	cl47985
Q#7 - >HORVU.MOREX.r3.2HG0108670.1.V3	superfamily	462242	37	248	1.39308e-35	131.08	cl47985	PK_Tyr_Ser-Thr superfamily	-	-
Q#7 - >HORVU.MOREX.r3.2HG0108670.1.V3	specific	427528	359	415	1.30857e-16	71.7479	pfam03822	NAF	-	cl17070
Q#7 - >HORVU.MOREX.r3.2HG0108670.1.V3	superfamily	473060	359	415	1.30857e-16	71.7479	cl17070	AMPKA_C_like superfamily	-	-
Q#8 - >HORVU.MOREX.r3.2HG0123910.1.V3	specific	459660	4	260	6.35843e-67	207.867	pfam00069	Pkinase	-	cl47491
Q#8 - >HORVU.MOREX.r3.2HG0123910.1.V3	superfamily	459660	4	260	6.35843e-67	207.867	cl47491	Pkinase superfamily	-	-
Q#8 - >HORVU.MOREX.r3.2HG0123910.1.V3	non-specific	462242	7	202	2.42144e-27	106.042	pfam07714	PK_Tyr_Ser-Thr	C	cl47985
Q#8 - >HORVU.MOREX.r3.2HG0123910.1.V3	superfamily	462242	7	202	2.42144e-27	106.042	cl47985	PK_Tyr_Ser-Thr superfamily	C	-
Q#9 - >HORVU.MOREX.r3.2HG0112410.1.V3	specific	459660	13	267	3.41129e-68	214.8	pfam00069	Pkinase	-	cl47491
Q#9 - >HORVU.MOREX.r3.2HG0112410.1.V3	superfamily	459660	13	267	3.41129e-68	214.8	cl47491	Pkinase superfamily	-	-
Q#9 - >HORVU.MOREX.r3.2HG0112410.1.V3	non-specific	462242	14	264	3.87149e-35	129.154	pfam07714	PK_Tyr_Ser-Thr	-	cl47985
Q#9 - >HORVU.MOREX.r3.2HG0112410.1.V3	superfamily	462242	14	264	3.87149e-35	129.154	cl47985	PK_Tyr_Ser-Thr superfamily	-	-
Q#9 - >HORVU.MOREX.r3.2HG0112410.1.V3	specific	427528	317	370	5.14371e-24	92.5487	pfam03822	NAF	-	cl17070
Q#9 - >HORVU.MOREX.r3.2HG0112410.1.V3	superfamily	473060	317	370	5.14371e-24	92.5487	cl17070	AMPKA_C_like superfamily	-	-
Q#9 - >HORVU.MOREX.r3.2HG0112410.1.V3	non-specific	405254	16	213	7.84511e-05	42.4835	pfam14531	Kinase-like	-	cl26012
Q#9 - >HORVU.MOREX.r3.2HG0112410.1.V3	superfamily	405254	16	213	7.84511e-05	42.4835	cl26012	Kinase-like superfamily	-	-
Q#10 - >HORVU.MOREX.r3.2HG0196120.1.V3	specific	459660	94	352	3.73737e-75	235.986	pfam00069	Pkinase	-	cl47491
Q#10 - >HORVU.MOREX.r3.2HG0196120.1.V3	superfamily	459660	94	352	3.73737e-75	235.986	cl47491	Pkinase superfamily	-	-
Q#10 - >HORVU.MOREX.r3.2HG0196120.1.V3	non-specific	462242	96	349	2.16059e-23	97.5672	pfam07714	PK_Tyr_Ser-Thr	-	cl47985
Q#10 - >HORVU.MOREX.r3.2HG0196120.1.V3	superfamily	462242	96	349	2.16059e-23	97.5672	cl47985	PK_Tyr_Ser-Thr superfamily	-	-
Q#10 - >HORVU.MOREX.r3.2HG0196120.1.V3	specific	463900	469	531	4.72946e-14	65.3525	pfam13499	EF-hand_7	-	cl38414
Q#10 - >HORVU.MOREX.r3.2HG0196120.1.V3	superfamily	463900	469	531	4.72946e-14	65.3525	cl38414	EF-hand_7 superfamily	-	-
Q#10 - >HORVU.MOREX.r3.2HG0196120.1.V3	specific	463900	400	461	5.44549e-12	59.1893	pfam13499	EF-hand_7	-	cl38414
Q#10 - >HORVU.MOREX.r3.2HG0196120.1.V3	superfamily	463900	400	461	5.44549e-12	59.1893	cl38414	EF-hand_7 superfamily	-	-
Q#10 - >HORVU.MOREX.r3.2HG0196120.1.V3	non-specific	463900	433	497	4.72539e-08	48.0186	pfam13499	EF-hand_7	-	cl38414
Q#10 - >HORVU.MOREX.r3.2HG0196120.1.V3	superfamily	463900	433	497	4.72539e-08	48.0186	cl38414	EF-hand_7 superfamily	-	-
Q#10 - >HORVU.MOREX.r3.2HG0196120.1.V3	non-specific	404678	412	463	5.03101e-07	44.9985	pfam13833	EF-hand_8	-	cl08302
Q#10 - >HORVU.MOREX.r3.2HG0196120.1.V3	superfamily	415501	412	463	5.03101e-07	44.9985	cl08302	EFh superfamily	-	-
Q#10 - >HORVU.MOREX.r3.2HG0196120.1.V3	non-specific	404678	483	532	3.585e-06	42.3021	pfam13833	EF-hand_8	-	cl08302
Q#10 - >HORVU.MOREX.r3.2HG0196120.1.V3	superfamily	415501	483	532	3.585e-06	42.3021	cl08302	EFh superfamily	-	-
Q#10 - >HORVU.MOREX.r3.2HG0196120.1.V3	non-specific	425435	506	532	4.43784e-06	41.6174	pfam00036	EF-hand_1	-	cl37953
Q#10 - >HORVU.MOREX.r3.2HG0196120.1.V3	superfamily	425435	506	532	4.43784e-06	41.6174	cl37953	EF-hand_1 superfamily	-	-
Q#10 - >HORVU.MOREX.r3.2HG0196120.1.V3	non-specific	425435	400	426	1.01138e-05	40.4618	pfam00036	EF-hand_1	-	cl37953
Q#10 - >HORVU.MOREX.r3.2HG0196120.1.V3	superfamily	425435	400	426	1.01138e-05	40.4618	cl37953	EF-hand_1 superfamily	-	-
Q#10 - >HORVU.MOREX.r3.2HG0196120.1.V3	non-specific	463869	400	428	5.3756e-05	38.3116	pfam13405	EF-hand_6	-	cl38409
Q#10 - >HORVU.MOREX.r3.2HG0196120.1.V3	superfamily	463869	400	428	5.3756e-05	38.3116	cl38409	EF-hand_6 superfamily	-	-
Q#10 - >HORVU.MOREX.r3.2HG0196120.1.V3	non-specific	463869	472	496	6.22868e-05	38.3116	pfam13405	EF-hand_6	-	cl38409
Q#10 - >HORVU.MOREX.r3.2HG0196120.1.V3	superfamily	463869	472	496	6.22868e-05	38.3116	cl38409	EF-hand_6 superfamily	-	-
Q#10 - >HORVU.MOREX.r3.2HG0196120.1.V3	non-specific	425435	471	496	0.000484065	35.8394	pfam00036	EF-hand_1	-	cl37953
Q#10 - >HORVU.MOREX.r3.2HG0196120.1.V3	non-specific	433035	472	494	0.000513579	35.7581	pfam13202	EF-hand_5	-	cl23632
Q#10 - >HORVU.MOREX.r3.2HG0196120.1.V3	superfamily	433035	472	494	0.000513579	35.7581	cl23632	EF-hand_5 superfamily	-	-
Q#10 - >HORVU.MOREX.r3.2HG0196120.1.V3	non-specific	428872	170	240	0.00354067	36.9842	pfam06293	Kdo	NC	cl21453
Q#10 - >HORVU.MOREX.r3.2HG0196120.1.V3	superfamily	473864	170	240	0.00354067	36.9842	cl21453	PKc_like superfamily	NC	-
Q#10 - >HORVU.MOREX.r3.2HG0196120.1.V3	non-specific	425435	435	459	0.00363547	33.143	pfam00036	EF-hand_1	-	cl37953
Q#10 - >HORVU.MOREX.r3.2HG0196120.1.V3	non-specific	433035	506	530	0.0054804	32.6765	pfam13202	EF-hand_5	-	cl23632
Q#10 - >HORVU.MOREX.r3.2HG0196120.1.V3	non-specific	433035	400	422	0.00654135	32.2913	pfam13202	EF-hand_5	-	cl23632
Q#10 - >HORVU.MOREX.r3.2HG0196120.1.V3	superfamily	433035	400	422	0.00654135	32.2913	cl23632	EF-hand_5 superfamily	-	-
Q#11 - >HORVU.MOREX.r3.2HG0208170.1.V3	specific	459660	20	282	3.48979e-52	172.814	pfam00069	Pkinase	-	cl47491
Q#11 - >HORVU.MOREX.r3.2HG0208170.1.V3	superfamily	459660	20	282	3.48979e-52	172.814	cl47491	Pkinase superfamily	-	-
Q#11 - >HORVU.MOREX.r3.2HG0208170.1.V3	non-specific	462242	21	279	2.37203e-26	104.886	pfam07714	PK_Tyr_Ser-Thr	-	cl47985
Q#11 - >HORVU.MOREX.r3.2HG0208170.1.V3	superfamily	462242	21	279	2.37203e-26	104.886	cl47985	PK_Tyr_Ser-Thr superfamily	-	-
Q#11 - >HORVU.MOREX.r3.2HG0208170.1.V3	non-specific	405254	22	270	1.20944e-12	65.9807	pfam14531	Kinase-like	-	cl26012
Q#11 - >HORVU.MOREX.r3.2HG0208170.1.V3	superfamily	405254	22	270	1.20944e-12	65.9807	cl26012	Kinase-like superfamily	-	-
Q#11 - >HORVU.MOREX.r3.2HG0208170.1.V3	non-specific	427528	318	371	1.40131e-07	46.3248	pfam03822	NAF	-	cl17070
Q#11 - >HORVU.MOREX.r3.2HG0208170.1.V3	superfamily	473060	318	371	1.40131e-07	46.3248	cl17070	AMPKA_C_like superfamily	-	-
Q#11 - >HORVU.MOREX.r3.2HG0208170.1.V3	non-specific	432484	13	170	5.15253e-06	46.3286	pfam12330	Haspin_kinase	NC	cl21453
Q#11 - >HORVU.MOREX.r3.2HG0208170.1.V3	superfamily	473864	13	170	5.15253e-06	46.3286	cl21453	PKc_like superfamily	NC	-
Q#11 - >HORVU.MOREX.r3.2HG0208170.1.V3	non-specific	427143	34	171	0.000140434	41.0652	pfam03109	ABC1	-	cl21453
Q#12 - >HORVU.MOREX.r3.2HG0112440.1.V3	specific	459660	34	287	5.52715e-59	190.533	pfam00069	Pkinase	-	cl47491
Q#12 - >HORVU.MOREX.r3.2HG0112440.1.V3	superfamily	459660	34	287	5.52715e-59	190.533	cl47491	Pkinase superfamily	-	-
Q#12 - >HORVU.MOREX.r3.2HG0112440.1.V3	non-specific	462242	35	275	4.8908e-26	104.116	pfam07714	PK_Tyr_Ser-Thr	-	cl47985
Q#12 - >HORVU.MOREX.r3.2HG0112440.1.V3	superfamily	462242	35	275	4.8908e-26	104.116	cl47985	PK_Tyr_Ser-Thr superfamily	-	-
Q#12 - >HORVU.MOREX.r3.2HG0112440.1.V3	non-specific	405254	28	275	5.26325e-14	70.2179	pfam14531	Kinase-like	-	cl26012
Q#12 - >HORVU.MOREX.r3.2HG0112440.1.V3	superfamily	405254	28	275	5.26325e-14	70.2179	cl26012	Kinase-like superfamily	-	-
Q#12 - >HORVU.MOREX.r3.2HG0112440.1.V3	specific	427528	322	374	7.58201e-11	55.5696	pfam03822	NAF	-	cl17070
Q#12 - >HORVU.MOREX.r3.2HG0112440.1.V3	superfamily	473060	322	374	7.58201e-11	55.5696	cl17070	AMPKA_C_like superfamily	-	-
Q#13 - >HORVU.MOREX.r3.2HG0216470.1.V3	specific	459660	4	260	1.82279e-63	200.933	pfam00069	Pkinase	-	cl47491
Q#13 - >HORVU.MOREX.r3.2HG0216470.1.V3	superfamily	459660	4	260	1.82279e-63	200.933	cl47491	Pkinase superfamily	-	-
Q#13 - >HORVU.MOREX.r3.2HG0216470.1.V3	non-specific	462242	8	254	3.29629e-27	106.812	pfam07714	PK_Tyr_Ser-Thr	-	cl47985
Q#13 - >HORVU.MOREX.r3.2HG0216470.1.V3	superfamily	462242	8	254	3.29629e-27	106.812	cl47985	PK_Tyr_Ser-Thr superfamily	-	-
Q#14 - >HORVU.MOREX.r3.2HG0153230.1.V3	specific	459660	25	280	2.46236e-70	217.497	pfam00069	Pkinase	-	cl47491
Q#14 - >HORVU.MOREX.r3.2HG0153230.1.V3	superfamily	459660	25	280	2.46236e-70	217.497	cl47491	Pkinase superfamily	-	-
Q#14 - >HORVU.MOREX.r3.2HG0153230.1.V3	non-specific	462242	26	276	1.03183e-38	136.858	pfam07714	PK_Tyr_Ser-Thr	-	cl47985
Q#14 - >HORVU.MOREX.r3.2HG0153230.1.V3	superfamily	462242	26	276	1.03183e-38	136.858	cl47985	PK_Tyr_Ser-Thr superfamily	-	-
Q#14 - >HORVU.MOREX.r3.2HG0153230.1.V3	non-specific	427528	324	354	2.09107e-07	45.5544	pfam03822	NAF	C	cl17070
Q#14 - >HORVU.MOREX.r3.2HG0153230.1.V3	superfamily	473060	324	354	2.09107e-07	45.5544	cl17070	AMPKA_C_like superfamily	C	-
Q#14 - >HORVU.MOREX.r3.2HG0153230.1.V3	non-specific	405254	108	226	6.17785e-07	48.2615	pfam14531	Kinase-like	N	cl26012
Q#14 - >HORVU.MOREX.r3.2HG0153230.1.V3	superfamily	405254	108	226	6.17785e-07	48.2615	cl26012	Kinase-like superfamily	N	-
Q#14 - >HORVU.MOREX.r3.2HG0153230.1.V3	non-specific	427143	80	170	0.000581454	39.1392	pfam03109	ABC1	N	cl21453
Q#14 - >HORVU.MOREX.r3.2HG0153230.1.V3	superfamily	473864	80	170	0.000581454	39.1392	cl21453	PKc_like superfamily	N	-
Q#15 - >HORVU.MOREX.r3.2HG0124380.1.V3	specific	459660	138	400	6.86877e-64	207.482	pfam00069	Pkinase	-	cl47491
Q#15 - >HORVU.MOREX.r3.2HG0124380.1.V3	superfamily	459660	138	400	6.86877e-64	207.482	cl47491	Pkinase superfamily	-	-
Q#15 - >HORVU.MOREX.r3.2HG0124380.1.V3	non-specific	462242	140	379	2.34604e-32	123.376	pfam07714	PK_Tyr_Ser-Thr	-	cl47985
Q#15 - >HORVU.MOREX.r3.2HG0124380.1.V3	superfamily	462242	140	379	2.34604e-32	123.376	cl47985	PK_Tyr_Ser-Thr superfamily	-	-
Q#15 - >HORVU.MOREX.r3.2HG0124380.1.V3	non-specific	405254	225	388	0.000492884	40.5575	pfam14531	Kinase-like	N	cl26012
Q#15 - >HORVU.MOREX.r3.2HG0124380.1.V3	superfamily	405254	225	388	0.000492884	40.5575	cl26012	Kinase-like superfamily	N	-
Q#15 - >HORVU.MOREX.r3.2HG0124380.1.V3	non-specific	428872	217	288	0.00374365	36.9842	pfam06293	Kdo	NC	cl21453
Q#15 - >HORVU.MOREX.r3.2HG0124380.1.V3	superfamily	473864	217	288	0.00374365	36.9842	cl21453	PKc_like superfamily	NC	-
Q#16 - >HORVU.MOREX.r3.2HG0188200.1.V3	specific	459660	102	360	1.18371e-75	236.757	pfam00069	Pkinase	-	cl47491
Q#16 - >HORVU.MOREX.r3.2HG0188200.1.V3	superfamily	459660	102	360	1.18371e-75	236.757	cl47491	Pkinase superfamily	-	-
Q#16 - >HORVU.MOREX.r3.2HG0188200.1.V3	non-specific	462242	104	303	1.19084e-19	86.7816	pfam07714	PK_Tyr_Ser-Thr	C	cl47985
Q#16 - >HORVU.MOREX.r3.2HG0188200.1.V3	superfamily	462242	104	303	1.19084e-19	86.7816	cl47985	PK_Tyr_Ser-Thr superfamily	C	-
Q#16 - >HORVU.MOREX.r3.2HG0188200.1.V3	specific	463900	476	539	6.03772e-16	70.3601	pfam13499	EF-hand_7	-	cl38414
Q#16 - >HORVU.MOREX.r3.2HG0188200.1.V3	superfamily	463900	476	539	6.03772e-16	70.3601	cl38414	EF-hand_7 superfamily	-	-
Q#16 - >HORVU.MOREX.r3.2HG0188200.1.V3	specific	463900	407	468	1.81832e-15	69.2045	pfam13499	EF-hand_7	-	cl38414
Q#16 - >HORVU.MOREX.r3.2HG0188200.1.V3	superfamily	463900	407	468	1.81832e-15	69.2045	cl38414	EF-hand_7 superfamily	-	-
Q#16 - >HORVU.MOREX.r3.2HG0188200.1.V3	non-specific	463869	478	507	2.72896e-07	44.86	pfam13405	EF-hand_6	-	cl38409
Q#16 - >HORVU.MOREX.r3.2HG0188200.1.V3	superfamily	463869	478	507	2.72896e-07	44.86	cl38409	EF-hand_6 superfamily	-	-
Q#16 - >HORVU.MOREX.r3.2HG0188200.1.V3	non-specific	404678	418	467	6.31556e-07	44.6133	pfam13833	EF-hand_8	-	cl08302
Q#16 - >HORVU.MOREX.r3.2HG0188200.1.V3	superfamily	415501	418	467	6.31556e-07	44.6133	cl08302	EFh superfamily	-	-
Q#16 - >HORVU.MOREX.r3.2HG0188200.1.V3	non-specific	404678	490	540	6.50429e-07	44.6133	pfam13833	EF-hand_8	-	cl08302
Q#16 - >HORVU.MOREX.r3.2HG0188200.1.V3	superfamily	415501	490	540	6.50429e-07	44.6133	cl08302	EFh superfamily	-	-
Q#16 - >HORVU.MOREX.r3.2HG0188200.1.V3	non-specific	425435	514	540	9.00539e-07	43.5434	pfam00036	EF-hand_1	-	cl37953
Q#16 - >HORVU.MOREX.r3.2HG0188200.1.V3	superfamily	425435	514	540	9.00539e-07	43.5434	cl37953	EF-hand_1 superfamily	-	-
Q#16 - >HORVU.MOREX.r3.2HG0188200.1.V3	non-specific	463869	407	435	9.03237e-06	40.6228	pfam13405	EF-hand_6	-	cl38409
Q#16 - >HORVU.MOREX.r3.2HG0188200.1.V3	superfamily	463869	407	435	9.03237e-06	40.6228	cl38409	EF-hand_6 superfamily	-	-
Q#16 - >HORVU.MOREX.r3.2HG0188200.1.V3	non-specific	425435	478	505	1.73931e-05	39.6914	pfam00036	EF-hand_1	-	cl37953
Q#16 - >HORVU.MOREX.r3.2HG0188200.1.V3	non-specific	425435	407	434	2.8408e-05	39.3062	pfam00036	EF-hand_1	-	cl37953
Q#16 - >HORVU.MOREX.r3.2HG0188200.1.V3	superfamily	425435	407	434	2.8408e-05	39.3062	cl37953	EF-hand_1 superfamily	-	-
Q#16 - >HORVU.MOREX.r3.2HG0188200.1.V3	non-specific	425435	442	468	0.000178149	36.995	pfam00036	EF-hand_1	-	cl37953
Q#16 - >HORVU.MOREX.r3.2HG0188200.1.V3	non-specific	433035	514	538	0.000309125	36.1433	pfam13202	EF-hand_5	-	cl23632
Q#16 - >HORVU.MOREX.r3.2HG0188200.1.V3	superfamily	433035	514	538	0.000309125	36.1433	cl23632	EF-hand_5 superfamily	-	-
Q#16 - >HORVU.MOREX.r3.2HG0188200.1.V3	non-specific	433035	407	428	0.000485541	35.7581	pfam13202	EF-hand_5	-	cl23632
Q#16 - >HORVU.MOREX.r3.2HG0188200.1.V3	superfamily	433035	407	428	0.000485541	35.7581	cl23632	EF-hand_5 superfamily	-	-
Q#16 - >HORVU.MOREX.r3.2HG0188200.1.V3	non-specific	405254	218	348	0.000716043	39.7871	pfam14531	Kinase-like	N	cl26012
Q#16 - >HORVU.MOREX.r3.2HG0188200.1.V3	superfamily	405254	218	348	0.000716043	39.7871	cl26012	Kinase-like superfamily	N	-
Q#16 - >HORVU.MOREX.r3.2HG0188200.1.V3	non-specific	463869	513	540	0.00168135	34.0744	pfam13405	EF-hand_6	-	cl38409
Q#16 - >HORVU.MOREX.r3.2HG0188200.1.V3	specific	464580	12	72	0.00792756	35.7838	pfam15240	Pro-rich	NC	cl26282
Q#16 - >HORVU.MOREX.r3.2HG0188200.1.V3	superfamily	464580	12	72	0.00792756	35.7838	cl26282	Pro-rich superfamily	NC	-
Q#16 - >HORVU.MOREX.r3.2HG0188200.1.V3	non-specific	463900	511	540	0.00844547	33.381	pfam13499	EF-hand_7	C	cl38414
Q#17 - >HORVU.MOREX.r3.2HG0121170.1.V3	specific	459660	13	268	2.08251e-70	220.578	pfam00069	Pkinase	-	cl47491
Q#17 - >HORVU.MOREX.r3.2HG0121170.1.V3	superfamily	459660	13	268	2.08251e-70	220.578	cl47491	Pkinase superfamily	-	-
Q#17 - >HORVU.MOREX.r3.2HG0121170.1.V3	non-specific	462242	14	235	9.54726e-38	136.472	pfam07714	PK_Tyr_Ser-Thr	-	cl47985
Q#17 - >HORVU.MOREX.r3.2HG0121170.1.V3	superfamily	462242	14	235	9.54726e-38	136.472	cl47985	PK_Tyr_Ser-Thr superfamily	-	-
Q#17 - >HORVU.MOREX.r3.2HG0121170.1.V3	specific	427528	308	363	5.52384e-19	78.2963	pfam03822	NAF	-	cl17070
Q#17 - >HORVU.MOREX.r3.2HG0121170.1.V3	superfamily	473060	308	363	5.52384e-19	78.2963	cl17070	AMPKA_C_like superfamily	-	-
Q#17 - >HORVU.MOREX.r3.2HG0121170.1.V3	non-specific	405254	16	215	2.84196e-05	43.6391	pfam14531	Kinase-like	-	cl26012
Q#17 - >HORVU.MOREX.r3.2HG0121170.1.V3	superfamily	405254	16	215	2.84196e-05	43.6391	cl26012	Kinase-like superfamily	-	-
Q#18 - >HORVU.MOREX.r3.2HG0110800.1.V3	specific	459660	19	274	4.38468e-72	219.808	pfam00069	Pkinase	-	cl47491
Q#18 - >HORVU.MOREX.r3.2HG0110800.1.V3	superfamily	459660	19	274	4.38468e-72	219.808	cl47491	Pkinase superfamily	-	-
Q#18 - >HORVU.MOREX.r3.2HG0110800.1.V3	non-specific	462242	20	232	4.35769e-33	120.679	pfam07714	PK_Tyr_Ser-Thr	-	cl47985
Q#18 - >HORVU.MOREX.r3.2HG0110800.1.V3	superfamily	462242	20	232	4.35769e-33	120.679	cl47985	PK_Tyr_Ser-Thr superfamily	-	-
Q#18 - >HORVU.MOREX.r3.2HG0110800.1.V3	non-specific	405254	111	223	6.9563e-05	41.7131	pfam14531	Kinase-like	N	cl26012
Q#18 - >HORVU.MOREX.r3.2HG0110800.1.V3	superfamily	405254	111	223	6.9563e-05	41.7131	cl26012	Kinase-like superfamily	N	-
Q#19 - >HORVU.MOREX.r3.2HG0151360.1.V3	specific	459660	103	361	8.7754e-79	245.616	pfam00069	Pkinase	-	cl47491
Q#19 - >HORVU.MOREX.r3.2HG0151360.1.V3	superfamily	459660	103	361	8.7754e-79	245.616	cl47491	Pkinase superfamily	-	-
Q#19 - >HORVU.MOREX.r3.2HG0151360.1.V3	non-specific	462242	104	318	1.52796e-24	101.034	pfam07714	PK_Tyr_Ser-Thr	-	cl47985
Q#19 - >HORVU.MOREX.r3.2HG0151360.1.V3	superfamily	462242	104	318	1.52796e-24	101.034	cl47985	PK_Tyr_Ser-Thr superfamily	-	-
Q#19 - >HORVU.MOREX.r3.2HG0151360.1.V3	specific	463900	409	470	9.90259e-13	61.5005	pfam13499	EF-hand_7	-	cl38414
Q#19 - >HORVU.MOREX.r3.2HG0151360.1.V3	superfamily	463900	409	470	9.90259e-13	61.5005	cl38414	EF-hand_7 superfamily	-	-
Q#19 - >HORVU.MOREX.r3.2HG0151360.1.V3	specific	463900	478	540	6.89828e-09	50.7149	pfam13499	EF-hand_7	-	cl38414
Q#19 - >HORVU.MOREX.r3.2HG0151360.1.V3	superfamily	463900	478	540	6.89828e-09	50.7149	cl38414	EF-hand_7 superfamily	-	-
Q#19 - >HORVU.MOREX.r3.2HG0151360.1.V3	non-specific	463900	442	505	6.30943e-08	48.0186	pfam13499	EF-hand_7	-	cl38414
Q#19 - >HORVU.MOREX.r3.2HG0151360.1.V3	superfamily	463900	442	505	6.30943e-08	48.0186	cl38414	EF-hand_7 superfamily	-	-
Q#19 - >HORVU.MOREX.r3.2HG0151360.1.V3	non-specific	404678	421	472	3.41369e-07	45.3837	pfam13833	EF-hand_8	-	cl08302
Q#19 - >HORVU.MOREX.r3.2HG0151360.1.V3	superfamily	415501	421	472	3.41369e-07	45.3837	cl08302	EFh superfamily	-	-
Q#19 - >HORVU.MOREX.r3.2HG0151360.1.V3	non-specific	463869	409	437	1.17684e-06	43.3192	pfam13405	EF-hand_6	-	cl38409
Q#19 - >HORVU.MOREX.r3.2HG0151360.1.V3	superfamily	463869	409	437	1.17684e-06	43.3192	cl38409	EF-hand_6 superfamily	-	-
Q#19 - >HORVU.MOREX.r3.2HG0151360.1.V3	non-specific	425435	409	436	2.40306e-06	42.3878	pfam00036	EF-hand_1	-	cl37953
Q#19 - >HORVU.MOREX.r3.2HG0151360.1.V3	superfamily	425435	409	436	2.40306e-06	42.3878	cl37953	EF-hand_1 superfamily	-	-
Q#19 - >HORVU.MOREX.r3.2HG0151360.1.V3	non-specific	463869	480	509	3.45982e-06	41.7784	pfam13405	EF-hand_6	-	cl38409
Q#19 - >HORVU.MOREX.r3.2HG0151360.1.V3	superfamily	463869	480	509	3.45982e-06	41.7784	cl38409	EF-hand_6 superfamily	-	-
Q#19 - >HORVU.MOREX.r3.2HG0151360.1.V3	non-specific	425435	481	508	0.000212938	36.6098	pfam00036	EF-hand_1	-	cl37953
Q#19 - >HORVU.MOREX.r3.2HG0151360.1.V3	superfamily	425435	481	508	0.000212938	36.6098	cl37953	EF-hand_1 superfamily	-	-
Q#19 - >HORVU.MOREX.r3.2HG0151360.1.V3	non-specific	433035	409	431	0.000365755	36.1433	pfam13202	EF-hand_5	-	cl23632
Q#19 - >HORVU.MOREX.r3.2HG0151360.1.V3	superfamily	433035	409	431	0.000365755	36.1433	cl23632	EF-hand_5 superfamily	-	-
Q#19 - >HORVU.MOREX.r3.2HG0151360.1.V3	non-specific	405254	186	349	0.000650055	39.7871	pfam14531	Kinase-like	N	cl26012
Q#19 - >HORVU.MOREX.r3.2HG0151360.1.V3	superfamily	405254	186	349	0.000650055	39.7871	cl26012	Kinase-like superfamily	N	-
Q#19 - >HORVU.MOREX.r3.2HG0151360.1.V3	non-specific	404678	389	435	0.00218553	34.5981	pfam13833	EF-hand_8	-	cl08302
Q#19 - >HORVU.MOREX.r3.2HG0151360.1.V3	non-specific	404678	457	501	0.00592321	33.4425	pfam13833	EF-hand_8	-	cl08302
Q#19 - >HORVU.MOREX.r3.2HG0151360.1.V3	superfamily	415501	457	501	0.00592321	33.4425	cl08302	EFh superfamily	-	-
Q#19 - >HORVU.MOREX.r3.2HG0151360.1.V3	non-specific	433035	483	503	0.00899751	32.2913	pfam13202	EF-hand_5	-	cl23632
Q#19 - >HORVU.MOREX.r3.2HG0151360.1.V3	superfamily	433035	483	503	0.00899751	32.2913	cl23632	EF-hand_5 superfamily	-	-
Q#20 - >HORVU.MOREX.r3.2HG0133550.1.V3	specific	459660	69	327	9.99422e-81	249.854	pfam00069	Pkinase	-	cl47491
Q#20 - >HORVU.MOREX.r3.2HG0133550.1.V3	superfamily	459660	69	327	9.99422e-81	249.854	cl47491	Pkinase superfamily	-	-
Q#20 - >HORVU.MOREX.r3.2HG0133550.1.V3	non-specific	462242	70	270	3.34467e-21	91.404	pfam07714	PK_Tyr_Ser-Thr	C	cl47985
Q#20 - >HORVU.MOREX.r3.2HG0133550.1.V3	superfamily	462242	70	270	3.34467e-21	91.404	cl47985	PK_Tyr_Ser-Thr superfamily	C	-
Q#20 - >HORVU.MOREX.r3.2HG0133550.1.V3	specific	463900	444	508	6.2414e-15	67.6637	pfam13499	EF-hand_7	-	cl38414
Q#20 - >HORVU.MOREX.r3.2HG0133550.1.V3	superfamily	463900	444	508	6.2414e-15	67.6637	cl38414	EF-hand_7 superfamily	-	-
Q#20 - >HORVU.MOREX.r3.2HG0133550.1.V3	specific	463900	375	434	8.54793e-08	47.2482	pfam13499	EF-hand_7	-	cl38414
Q#20 - >HORVU.MOREX.r3.2HG0133550.1.V3	superfamily	463900	375	434	8.54793e-08	47.2482	cl38414	EF-hand_7 superfamily	-	-
Q#20 - >HORVU.MOREX.r3.2HG0133550.1.V3	non-specific	405254	71	315	9.56172e-08	51.7283	pfam14531	Kinase-like	-	cl26012
Q#20 - >HORVU.MOREX.r3.2HG0133550.1.V3	superfamily	405254	71	315	9.56172e-08	51.7283	cl26012	Kinase-like superfamily	-	-
Q#20 - >HORVU.MOREX.r3.2HG0133550.1.V3	non-specific	425435	483	509	6.04812e-07	43.9286	pfam00036	EF-hand_1	-	cl37953
Q#20 - >HORVU.MOREX.r3.2HG0133550.1.V3	superfamily	425435	483	509	6.04812e-07	43.9286	cl37953	EF-hand_1 superfamily	-	-
Q#20 - >HORVU.MOREX.r3.2HG0133550.1.V3	non-specific	404678	458	508	1.16509e-06	43.8429	pfam13833	EF-hand_8	-	cl08302
Q#20 - >HORVU.MOREX.r3.2HG0133550.1.V3	superfamily	415501	458	508	1.16509e-06	43.8429	cl08302	EFh superfamily	-	-
Q#20 - >HORVU.MOREX.r3.2HG0133550.1.V3	non-specific	404678	390	438	2.03278e-05	40.3761	pfam13833	EF-hand_8	-	cl08302
Q#20 - >HORVU.MOREX.r3.2HG0133550.1.V3	superfamily	415501	390	438	2.03278e-05	40.3761	cl08302	EFh superfamily	-	-
Q#20 - >HORVU.MOREX.r3.2HG0133550.1.V3	non-specific	433035	483	507	7.05206e-05	38.0693	pfam13202	EF-hand_5	-	cl23632
Q#20 - >HORVU.MOREX.r3.2HG0133550.1.V3	superfamily	433035	483	507	7.05206e-05	38.0693	cl23632	EF-hand_5 superfamily	-	-
Q#20 - >HORVU.MOREX.r3.2HG0133550.1.V3	non-specific	425435	375	402	0.000257167	36.6098	pfam00036	EF-hand_1	-	cl37953
Q#20 - >HORVU.MOREX.r3.2HG0133550.1.V3	superfamily	425435	375	402	0.000257167	36.6098	cl37953	EF-hand_1 superfamily	-	-
Q#20 - >HORVU.MOREX.r3.2HG0133550.1.V3	non-specific	463869	447	471	0.00152932	34.4596	pfam13405	EF-hand_6	-	cl38409
Q#20 - >HORVU.MOREX.r3.2HG0133550.1.V3	superfamily	463869	447	471	0.00152932	34.4596	cl38409	EF-hand_6 superfamily	-	-
Q#20 - >HORVU.MOREX.r3.2HG0133550.1.V3	non-specific	433035	375	396	0.00288301	33.4469	pfam13202	EF-hand_5	-	cl23632
Q#20 - >HORVU.MOREX.r3.2HG0133550.1.V3	superfamily	433035	375	396	0.00288301	33.4469	cl23632	EF-hand_5 superfamily	-	-
Q#20 - >HORVU.MOREX.r3.2HG0133550.1.V3	non-specific	463869	375	403	0.00438467	32.9188	pfam13405	EF-hand_6	-	cl38409
Q#20 - >HORVU.MOREX.r3.2HG0133550.1.V3	superfamily	463869	375	403	0.00438467	32.9188	cl38409	EF-hand_6 superfamily	-	-
Q#20 - >HORVU.MOREX.r3.2HG0133550.1.V3	non-specific	425435	446	469	0.00581059	32.7578	pfam00036	EF-hand_1	C	cl37953
Q#21 - >HORVU.MOREX.r3.2HG0119920.1.V3	specific	459660	142	404	1.40833e-66	214.415	pfam00069	Pkinase	-	cl47491
Q#21 - >HORVU.MOREX.r3.2HG0119920.1.V3	superfamily	459660	142	404	1.40833e-66	214.415	cl47491	Pkinase superfamily	-	-
Q#21 - >HORVU.MOREX.r3.2HG0119920.1.V3	non-specific	462242	143	347	8.74597e-29	113.36	pfam07714	PK_Tyr_Ser-Thr	C	cl47985
Q#21 - >HORVU.MOREX.r3.2HG0119920.1.V3	superfamily	462242	143	347	8.74597e-29	113.36	cl47985	PK_Tyr_Ser-Thr superfamily	C	-
Q#21 - >HORVU.MOREX.r3.2HG0119920.1.V3	non-specific	405254	229	392	0.00389788	37.4759	pfam14531	Kinase-like	N	cl26012
Q#21 - >HORVU.MOREX.r3.2HG0119920.1.V3	superfamily	405254	229	392	0.00389788	37.4759	cl26012	Kinase-like superfamily	N	-
Q#21 - >HORVU.MOREX.r3.2HG0119920.1.V3	specific	463900	451	510	0.00510104	34.1514	pfam13499	EF-hand_7	-	cl38414
Q#21 - >HORVU.MOREX.r3.2HG0119920.1.V3	superfamily	463900	451	510	0.00510104	34.1514	cl38414	EF-hand_7 superfamily	-	-
Q#21 - >HORVU.MOREX.r3.2HG0119920.1.V3	non-specific	428872	221	292	0.0071282	36.2138	pfam06293	Kdo	NC	cl21453
Q#21 - >HORVU.MOREX.r3.2HG0119920.1.V3	superfamily	473864	221	292	0.0071282	36.2138	cl21453	PKc_like superfamily	NC	-
Q#22 - >HORVU.MOREX.r3.2HG0201420.1.V3	specific	459660	4	260	5.01612e-66	205.556	pfam00069	Pkinase	-	cl47491
Q#22 - >HORVU.MOREX.r3.2HG0201420.1.V3	superfamily	459660	4	260	5.01612e-66	205.556	cl47491	Pkinase superfamily	-	-
Q#22 - >HORVU.MOREX.r3.2HG0201420.1.V3	non-specific	462242	8	202	5.67026e-26	102.575	pfam07714	PK_Tyr_Ser-Thr	C	cl47985
Q#22 - >HORVU.MOREX.r3.2HG0201420.1.V3	superfamily	462242	8	202	5.67026e-26	102.575	cl47985	PK_Tyr_Ser-Thr superfamily	C	-
Q#23 - >HORVU.MOREX.r3.4HG0410700.1.V3	specific	459660	81	339	8.2061e-72	226.742	pfam00069	Pkinase	-	cl47491
Q#23 - >HORVU.MOREX.r3.4HG0410700.1.V3	superfamily	459660	81	339	8.2061e-72	226.742	cl47491	Pkinase superfamily	-	-
Q#23 - >HORVU.MOREX.r3.4HG0410700.1.V3	non-specific	462242	82	282	2.78356e-20	88.7076	pfam07714	PK_Tyr_Ser-Thr	C	cl47985
Q#23 - >HORVU.MOREX.r3.4HG0410700.1.V3	superfamily	462242	82	282	2.78356e-20	88.7076	cl47985	PK_Tyr_Ser-Thr superfamily	C	-
Q#23 - >HORVU.MOREX.r3.4HG0410700.1.V3	specific	463900	456	518	6.61991e-13	61.8857	pfam13499	EF-hand_7	-	cl38414
Q#23 - >HORVU.MOREX.r3.4HG0410700.1.V3	superfamily	463900	456	518	6.61991e-13	61.8857	cl38414	EF-hand_7 superfamily	-	-
Q#23 - >HORVU.MOREX.r3.4HG0410700.1.V3	specific	463900	387	448	7.44323e-09	50.3297	pfam13499	EF-hand_7	-	cl38414
Q#23 - >HORVU.MOREX.r3.4HG0410700.1.V3	superfamily	463900	387	448	7.44323e-09	50.3297	cl38414	EF-hand_7 superfamily	-	-
Q#23 - >HORVU.MOREX.r3.4HG0410700.1.V3	non-specific	425435	493	518	3.35179e-06	42.0026	pfam00036	EF-hand_1	-	cl37953
Q#23 - >HORVU.MOREX.r3.4HG0410700.1.V3	superfamily	425435	493	518	3.35179e-06	42.0026	cl37953	EF-hand_1 superfamily	-	-
Q#23 - >HORVU.MOREX.r3.4HG0410700.1.V3	non-specific	404678	470	518	8.28977e-06	41.5317	pfam13833	EF-hand_8	-	cl08302
Q#23 - >HORVU.MOREX.r3.4HG0410700.1.V3	superfamily	415501	470	518	8.28977e-06	41.5317	cl08302	EFh superfamily	-	-
Q#23 - >HORVU.MOREX.r3.4HG0410700.1.V3	non-specific	404678	399	445	1.31577e-05	40.7613	pfam13833	EF-hand_8	-	cl08302
Q#23 - >HORVU.MOREX.r3.4HG0410700.1.V3	superfamily	415501	399	445	1.31577e-05	40.7613	cl08302	EFh superfamily	-	-
Q#23 - >HORVU.MOREX.r3.4HG0410700.1.V3	non-specific	463900	420	477	0.00136717	35.6922	pfam13499	EF-hand_7	-	cl38414
Q#23 - >HORVU.MOREX.r3.4HG0410700.1.V3	superfamily	463900	420	477	0.00136717	35.6922	cl38414	EF-hand_7 superfamily	-	-
Q#23 - >HORVU.MOREX.r3.4HG0410700.1.V3	non-specific	463869	459	487	0.00193167	34.0744	pfam13405	EF-hand_6	-	cl38409
Q#23 - >HORVU.MOREX.r3.4HG0410700.1.V3	superfamily	463869	459	487	0.00193167	34.0744	cl38409	EF-hand_6 superfamily	-	-
Q#23 - >HORVU.MOREX.r3.4HG0410700.1.V3	non-specific	463869	387	415	0.00211058	34.0744	pfam13405	EF-hand_6	-	cl38409
Q#23 - >HORVU.MOREX.r3.4HG0410700.1.V3	superfamily	463869	387	415	0.00211058	34.0744	cl38409	EF-hand_6 superfamily	-	-
Q#23 - >HORVU.MOREX.r3.4HG0410700.1.V3	non-specific	425435	387	413	0.00337244	33.5282	pfam00036	EF-hand_1	-	cl37953
Q#23 - >HORVU.MOREX.r3.4HG0410700.1.V3	superfamily	425435	387	413	0.00337244	33.5282	cl37953	EF-hand_1 superfamily	-	-
Q#24 - >HORVU.MOREX.r3.4HG0410930.1.V3	specific	459660	19	274	3.08455e-66	209.408	pfam00069	Pkinase	-	cl47491
Q#24 - >HORVU.MOREX.r3.4HG0410930.1.V3	superfamily	459660	19	274	3.08455e-66	209.408	cl47491	Pkinase superfamily	-	-
Q#24 - >HORVU.MOREX.r3.4HG0410930.1.V3	non-specific	462242	20	271	8.53114e-37	133.776	pfam07714	PK_Tyr_Ser-Thr	-	cl47985
Q#24 - >HORVU.MOREX.r3.4HG0410930.1.V3	superfamily	462242	20	271	8.53114e-37	133.776	cl47985	PK_Tyr_Ser-Thr superfamily	-	-
Q#24 - >HORVU.MOREX.r3.4HG0410930.1.V3	specific	427528	315	373	9.319e-21	83.3039	pfam03822	NAF	-	cl17070
Q#24 - >HORVU.MOREX.r3.4HG0410930.1.V3	superfamily	473060	315	373	9.319e-21	83.3039	cl17070	AMPKA_C_like superfamily	-	-
Q#24 - >HORVU.MOREX.r3.4HG0410930.1.V3	non-specific	405254	7	223	2.28434e-08	53.2691	pfam14531	Kinase-like	-	cl26012
Q#24 - >HORVU.MOREX.r3.4HG0410930.1.V3	superfamily	405254	7	223	2.28434e-08	53.2691	cl26012	Kinase-like superfamily	-	-
Q#25 - >HORVU.MOREX.r3.4HG0349000.1.V3	specific	459660	50	308	7.40001e-80	246.772	pfam00069	Pkinase	-	cl47491
Q#25 - >HORVU.MOREX.r3.4HG0349000.1.V3	superfamily	459660	50	308	7.40001e-80	246.772	cl47491	Pkinase superfamily	-	-
Q#25 - >HORVU.MOREX.r3.4HG0349000.1.V3	non-specific	462242	51	266	4.07137e-24	99.4932	pfam07714	PK_Tyr_Ser-Thr	-	cl47985
Q#25 - >HORVU.MOREX.r3.4HG0349000.1.V3	superfamily	462242	51	266	4.07137e-24	99.4932	cl47985	PK_Tyr_Ser-Thr superfamily	-	-
Q#25 - >HORVU.MOREX.r3.4HG0349000.1.V3	specific	463900	425	487	4.81123e-15	68.0489	pfam13499	EF-hand_7	-	cl38414
Q#25 - >HORVU.MOREX.r3.4HG0349000.1.V3	superfamily	463900	425	487	4.81123e-15	68.0489	cl38414	EF-hand_7 superfamily	-	-
Q#25 - >HORVU.MOREX.r3.4HG0349000.1.V3	specific	463900	356	417	2.08821e-12	60.3449	pfam13499	EF-hand_7	-	cl38414
Q#25 - >HORVU.MOREX.r3.4HG0349000.1.V3	superfamily	463900	356	417	2.08821e-12	60.3449	cl38414	EF-hand_7 superfamily	-	-
Q#25 - >HORVU.MOREX.r3.4HG0349000.1.V3	non-specific	404678	368	418	1.1333e-09	52.3173	pfam13833	EF-hand_8	-	cl08302
Q#25 - >HORVU.MOREX.r3.4HG0349000.1.V3	superfamily	415501	368	418	1.1333e-09	52.3173	cl08302	EFh superfamily	-	-
Q#25 - >HORVU.MOREX.r3.4HG0349000.1.V3	non-specific	463869	356	384	1.67355e-06	42.5488	pfam13405	EF-hand_6	-	cl38409
Q#25 - >HORVU.MOREX.r3.4HG0349000.1.V3	superfamily	463869	356	384	1.67355e-06	42.5488	cl38409	EF-hand_6 superfamily	-	-
Q#25 - >HORVU.MOREX.r3.4HG0349000.1.V3	non-specific	425435	461	488	3.03848e-06	42.0026	pfam00036	EF-hand_1	-	cl37953
Q#25 - >HORVU.MOREX.r3.4HG0349000.1.V3	superfamily	425435	461	488	3.03848e-06	42.0026	cl37953	EF-hand_1 superfamily	-	-
Q#25 - >HORVU.MOREX.r3.4HG0349000.1.V3	non-specific	425435	356	383	4.1991e-06	41.6174	pfam00036	EF-hand_1	-	cl37953
Q#25 - >HORVU.MOREX.r3.4HG0349000.1.V3	superfamily	425435	356	383	4.1991e-06	41.6174	cl37953	EF-hand_1 superfamily	-	-
Q#25 - >HORVU.MOREX.r3.4HG0349000.1.V3	non-specific	463869	427	456	1.58134e-05	39.8524	pfam13405	EF-hand_6	-	cl38409
Q#25 - >HORVU.MOREX.r3.4HG0349000.1.V3	superfamily	463869	427	456	1.58134e-05	39.8524	cl38409	EF-hand_6 superfamily	-	-
Q#25 - >HORVU.MOREX.r3.4HG0349000.1.V3	non-specific	404678	439	488	1.5979e-05	40.3761	pfam13833	EF-hand_8	-	cl08302
Q#25 - >HORVU.MOREX.r3.4HG0349000.1.V3	superfamily	415501	439	488	1.5979e-05	40.3761	cl08302	EFh superfamily	-	-
Q#25 - >HORVU.MOREX.r3.4HG0349000.1.V3	non-specific	425435	431	455	0.000315221	36.2246	pfam00036	EF-hand_1	-	cl37953
Q#25 - >HORVU.MOREX.r3.4HG0349000.1.V3	non-specific	433035	356	377	0.000902242	34.9877	pfam13202	EF-hand_5	-	cl23632
Q#25 - >HORVU.MOREX.r3.4HG0349000.1.V3	superfamily	433035	356	377	0.000902242	34.9877	cl23632	EF-hand_5 superfamily	-	-
Q#25 - >HORVU.MOREX.r3.4HG0349000.1.V3	non-specific	433035	462	486	0.00236257	33.4469	pfam13202	EF-hand_5	-	cl23632
Q#25 - >HORVU.MOREX.r3.4HG0349000.1.V3	superfamily	433035	462	486	0.00236257	33.4469	cl23632	EF-hand_5 superfamily	-	-
Q#25 - >HORVU.MOREX.r3.4HG0349000.1.V3	non-specific	425435	391	415	0.0032099	33.5282	pfam00036	EF-hand_1	-	cl37953
Q#25 - >HORVU.MOREX.r3.4HG0349000.1.V3	non-specific	433035	428	448	0.00336526	33.0617	pfam13202	EF-hand_5	-	cl23632
Q#25 - >HORVU.MOREX.r3.4HG0349000.1.V3	non-specific	404678	336	382	0.00545209	33.4425	pfam13833	EF-hand_8	-	cl08302
Q#25 - >HORVU.MOREX.r3.4HG0349000.1.V3	non-specific	428872	110	189	0.00794735	35.8286	pfam06293	Kdo	NC	cl21453
Q#25 - >HORVU.MOREX.r3.4HG0349000.1.V3	superfamily	473864	110	189	0.00794735	35.8286	cl21453	PKc_like superfamily	NC	-
Q#26 - >HORVU.MOREX.r3.4HG0356420.1.V3	specific	459660	13	268	1.62687e-67	212.874	pfam00069	Pkinase	-	cl47491
Q#26 - >HORVU.MOREX.r3.4HG0356420.1.V3	superfamily	459660	13	268	1.62687e-67	212.874	cl47491	Pkinase superfamily	-	-
Q#26 - >HORVU.MOREX.r3.4HG0356420.1.V3	non-specific	462242	14	228	7.81239e-31	117.598	pfam07714	PK_Tyr_Ser-Thr	-	cl47985
Q#26 - >HORVU.MOREX.r3.4HG0356420.1.V3	superfamily	462242	14	228	7.81239e-31	117.598	cl47985	PK_Tyr_Ser-Thr superfamily	-	-
Q#26 - >HORVU.MOREX.r3.4HG0356420.1.V3	specific	427528	311	366	1.60266e-24	93.7043	pfam03822	NAF	-	cl17070
Q#26 - >HORVU.MOREX.r3.4HG0356420.1.V3	superfamily	473060	311	366	1.60266e-24	93.7043	cl17070	AMPKA_C_like superfamily	-	-
Q#26 - >HORVU.MOREX.r3.4HG0356420.1.V3	non-specific	464129	268	419	7.619e-10	55.1787	pfam14303	NAM-associated	-	cl24049
Q#26 - >HORVU.MOREX.r3.4HG0356420.1.V3	superfamily	464129	268	419	7.619e-10	55.1787	cl24049	NAM-associated superfamily	-	-
Q#26 - >HORVU.MOREX.r3.4HG0356420.1.V3	non-specific	405254	15	214	5.49337e-06	45.9503	pfam14531	Kinase-like	-	cl26012
Q#26 - >HORVU.MOREX.r3.4HG0356420.1.V3	superfamily	405254	15	214	5.49337e-06	45.9503	cl26012	Kinase-like superfamily	-	-
Q#27 - >HORVU.MOREX.r3.4HG0385110.1.V3	specific	459660	17	269	2.7266e-78	242.535	pfam00069	Pkinase	-	cl47491
Q#27 - >HORVU.MOREX.r3.4HG0385110.1.V3	superfamily	459660	17	269	2.7266e-78	242.535	cl47491	Pkinase superfamily	-	-
Q#27 - >HORVU.MOREX.r3.4HG0385110.1.V3	non-specific	462242	19	235	1.85827e-35	131.08	pfam07714	PK_Tyr_Ser-Thr	-	cl47985
Q#27 - >HORVU.MOREX.r3.4HG0385110.1.V3	superfamily	462242	19	235	1.85827e-35	131.08	cl47985	PK_Tyr_Ser-Thr superfamily	-	-
Q#27 - >HORVU.MOREX.r3.4HG0385110.1.V3	specific	460465	466	508	3.48869e-10	53.2458	pfam02149	KA1	-	cl47725
Q#27 - >HORVU.MOREX.r3.4HG0385110.1.V3	superfamily	460465	466	508	3.48869e-10	53.2458	cl47725	KA1 superfamily	-	-
Q#27 - >HORVU.MOREX.r3.4HG0385110.1.V3	non-specific	405254	19	218	3.42372e-08	52.8839	pfam14531	Kinase-like	-	cl26012
Q#27 - >HORVU.MOREX.r3.4HG0385110.1.V3	superfamily	405254	19	218	3.42372e-08	52.8839	cl26012	Kinase-like superfamily	-	-
Q#27 - >HORVU.MOREX.r3.4HG0385110.1.V3	non-specific	406881	389	484	7.7332e-07	46.1946	pfam16579	AdenylateSensor	C	cl17070
Q#27 - >HORVU.MOREX.r3.4HG0385110.1.V3	superfamily	473060	389	484	7.7332e-07	46.1946	cl17070	AMPKA_C_like superfamily	C	-
Q#27 - >HORVU.MOREX.r3.4HG0385110.1.V3	specific	395502	291	327	2.19339e-05	39.7311	pfam00627	UBA	-	cl21463
Q#27 - >HORVU.MOREX.r3.4HG0385110.1.V3	superfamily	473871	291	327	2.19339e-05	39.7311	cl21463	UBA_like_SF superfamily	-	-
Q#28 - >HORVU.MOREX.r3.4HG0352300.1.V3	specific	459660	12	267	1.06366e-59	192.459	pfam00069	Pkinase	-	cl47491
Q#28 - >HORVU.MOREX.r3.4HG0352300.1.V3	superfamily	459660	12	267	1.06366e-59	192.459	cl47491	Pkinase superfamily	-	-
Q#28 - >HORVU.MOREX.r3.4HG0352300.1.V3	non-specific	462242	13	263	7.11254e-37	133.776	pfam07714	PK_Tyr_Ser-Thr	-	cl47985
Q#28 - >HORVU.MOREX.r3.4HG0352300.1.V3	superfamily	462242	13	263	7.11254e-37	133.776	cl47985	PK_Tyr_Ser-Thr superfamily	-	-
Q#28 - >HORVU.MOREX.r3.4HG0352300.1.V3	specific	427528	313	368	1.8697e-25	96.4007	pfam03822	NAF	-	cl17070
Q#28 - >HORVU.MOREX.r3.4HG0352300.1.V3	superfamily	473060	313	368	1.8697e-25	96.4007	cl17070	AMPKA_C_like superfamily	-	-
Q#28 - >HORVU.MOREX.r3.4HG0352300.1.V3	non-specific	405254	14	255	4.79295e-05	42.8687	pfam14531	Kinase-like	-	cl26012
Q#28 - >HORVU.MOREX.r3.4HG0352300.1.V3	superfamily	405254	14	255	4.79295e-05	42.8687	cl26012	Kinase-like superfamily	-	-
Q#29 - >HORVU.MOREX.r3.4HG0350770.1.V3	specific	459660	17	272	2.79194e-59	191.303	pfam00069	Pkinase	-	cl47491
Q#29 - >HORVU.MOREX.r3.4HG0350770.1.V3	superfamily	459660	17	272	2.79194e-59	191.303	cl47491	Pkinase superfamily	-	-
Q#29 - >HORVU.MOREX.r3.4HG0350770.1.V3	non-specific	462242	18	268	3.24725e-25	101.804	pfam07714	PK_Tyr_Ser-Thr	-	cl47985
Q#29 - >HORVU.MOREX.r3.4HG0350770.1.V3	superfamily	462242	18	268	3.24725e-25	101.804	cl47985	PK_Tyr_Ser-Thr superfamily	-	-
Q#29 - >HORVU.MOREX.r3.4HG0350770.1.V3	specific	427528	304	364	2.14565e-19	79.4519	pfam03822	NAF	-	cl17070
Q#29 - >HORVU.MOREX.r3.4HG0350770.1.V3	superfamily	473060	304	364	2.14565e-19	79.4519	cl17070	AMPKA_C_like superfamily	-	-
Q#29 - >HORVU.MOREX.r3.4HG0350770.1.V3	non-specific	405254	114	218	0.000127158	41.7131	pfam14531	Kinase-like	N	cl26012
Q#29 - >HORVU.MOREX.r3.4HG0350770.1.V3	superfamily	405254	114	218	0.000127158	41.7131	cl26012	Kinase-like superfamily	N	-
Q#29 - >HORVU.MOREX.r3.4HG0350770.1.V3	non-specific	426359	114	166	0.00123394	38.251	pfam01636	APH	N	cl37506
Q#29 - >HORVU.MOREX.r3.4HG0350770.1.V3	superfamily	426359	114	166	0.00123394	38.251	cl37506	APH superfamily	N	-
Q#29 - >HORVU.MOREX.r3.4HG0350770.1.V3	non-specific	427143	86	162	0.00250795	37.5984	pfam03109	ABC1	N	cl21453
Q#29 - >HORVU.MOREX.r3.4HG0350770.1.V3	superfamily	473864	86	162	0.00250795	37.5984	cl21453	PKc_like superfamily	N	-
Q#30 - >HORVU.MOREX.r3.4HG0356730.1.V3	specific	459660	75	333	6.56335e-72	226.742	pfam00069	Pkinase	-	cl47491
Q#30 - >HORVU.MOREX.r3.4HG0356730.1.V3	superfamily	459660	75	333	6.56335e-72	226.742	cl47491	Pkinase superfamily	-	-
Q#30 - >HORVU.MOREX.r3.4HG0356730.1.V3	non-specific	462242	77	276	2.45587e-23	97.5672	pfam07714	PK_Tyr_Ser-Thr	C	cl47985
Q#30 - >HORVU.MOREX.r3.4HG0356730.1.V3	superfamily	462242	77	276	2.45587e-23	97.5672	cl47985	PK_Tyr_Ser-Thr superfamily	C	-
Q#30 - >HORVU.MOREX.r3.4HG0356730.1.V3	specific	463900	450	513	2.85378e-16	71.5157	pfam13499	EF-hand_7	-	cl38414
Q#30 - >HORVU.MOREX.r3.4HG0356730.1.V3	superfamily	463900	450	513	2.85378e-16	71.5157	cl38414	EF-hand_7 superfamily	-	-
Q#30 - >HORVU.MOREX.r3.4HG0356730.1.V3	specific	463900	381	441	2.32662e-14	66.1229	pfam13499	EF-hand_7	-	cl38414
Q#30 - >HORVU.MOREX.r3.4HG0356730.1.V3	superfamily	463900	381	441	2.32662e-14	66.1229	cl38414	EF-hand_7 superfamily	-	-
Q#30 - >HORVU.MOREX.r3.4HG0356730.1.V3	non-specific	404678	465	514	4.89277e-09	50.3913	pfam13833	EF-hand_8	-	cl08302
Q#30 - >HORVU.MOREX.r3.4HG0356730.1.V3	superfamily	415501	465	514	4.89277e-09	50.3913	cl08302	EFh superfamily	-	-
Q#30 - >HORVU.MOREX.r3.4HG0356730.1.V3	non-specific	425435	487	514	4.64843e-08	47.0102	pfam00036	EF-hand_1	-	cl37953
Q#30 - >HORVU.MOREX.r3.4HG0356730.1.V3	superfamily	425435	487	514	4.64843e-08	47.0102	cl37953	EF-hand_1 superfamily	-	-
Q#30 - >HORVU.MOREX.r3.4HG0356730.1.V3	non-specific	404678	393	443	3.95325e-07	44.9985	pfam13833	EF-hand_8	-	cl08302
Q#30 - >HORVU.MOREX.r3.4HG0356730.1.V3	superfamily	415501	393	443	3.95325e-07	44.9985	cl08302	EFh superfamily	-	-
Q#30 - >HORVU.MOREX.r3.4HG0356730.1.V3	non-specific	463869	453	481	1.79667e-06	42.5488	pfam13405	EF-hand_6	-	cl38409
Q#30 - >HORVU.MOREX.r3.4HG0356730.1.V3	superfamily	463869	453	481	1.79667e-06	42.5488	cl38409	EF-hand_6 superfamily	-	-
Q#30 - >HORVU.MOREX.r3.4HG0356730.1.V3	non-specific	425435	381	408	4.82815e-06	41.2322	pfam00036	EF-hand_1	-	cl37953
Q#30 - >HORVU.MOREX.r3.4HG0356730.1.V3	superfamily	425435	381	408	4.82815e-06	41.2322	cl37953	EF-hand_1 superfamily	-	-
Q#30 - >HORVU.MOREX.r3.4HG0356730.1.V3	non-specific	463869	381	409	1.96709e-05	39.8524	pfam13405	EF-hand_6	-	cl38409
Q#30 - >HORVU.MOREX.r3.4HG0356730.1.V3	superfamily	463869	381	409	1.96709e-05	39.8524	cl38409	EF-hand_6 superfamily	-	-
Q#30 - >HORVU.MOREX.r3.4HG0356730.1.V3	non-specific	289529	373	440	0.000110482	39.6639	pfam12763	EF-hand_4	C	cl44380
Q#30 - >HORVU.MOREX.r3.4HG0356730.1.V3	superfamily	289529	373	440	0.000110482	39.6639	cl44380	EF-hand_4 superfamily	C	-
Q#30 - >HORVU.MOREX.r3.4HG0356730.1.V3	non-specific	425435	456	479	0.000126729	37.3802	pfam00036	EF-hand_1	-	cl37953
Q#30 - >HORVU.MOREX.r3.4HG0356730.1.V3	non-specific	425435	416	440	0.000328635	36.2246	pfam00036	EF-hand_1	-	cl37953
Q#30 - >HORVU.MOREX.r3.4HG0356730.1.V3	non-specific	463869	487	514	0.000760264	35.23	pfam13405	EF-hand_6	-	cl38409
Q#30 - >HORVU.MOREX.r3.4HG0356730.1.V3	non-specific	433035	488	512	0.00125036	34.6025	pfam13202	EF-hand_5	-	cl23632
Q#30 - >HORVU.MOREX.r3.4HG0356730.1.V3	superfamily	433035	488	512	0.00125036	34.6025	cl23632	EF-hand_5 superfamily	-	-
Q#30 - >HORVU.MOREX.r3.4HG0356730.1.V3	non-specific	433035	381	403	0.0015069	34.2173	pfam13202	EF-hand_5	-	cl23632
Q#30 - >HORVU.MOREX.r3.4HG0356730.1.V3	superfamily	433035	381	403	0.0015069	34.2173	cl23632	EF-hand_5 superfamily	-	-
Q#30 - >HORVU.MOREX.r3.4HG0356730.1.V3	non-specific	433035	453	475	0.00579125	32.6765	pfam13202	EF-hand_5	-	cl23632
Q#30 - >HORVU.MOREX.r3.4HG0356730.1.V3	non-specific	463900	486	522	0.00889227	33.381	pfam13499	EF-hand_7	C	cl38414
Q#31 - >HORVU.MOREX.r3.4HG0342860.1.V3	specific	459660	23	279	1.63627e-68	212.874	pfam00069	Pkinase	-	cl47491
Q#31 - >HORVU.MOREX.r3.4HG0342860.1.V3	superfamily	459660	23	279	1.63627e-68	212.874	cl47491	Pkinase superfamily	-	-
Q#31 - >HORVU.MOREX.r3.4HG0342860.1.V3	non-specific	462242	24	221	2.74216e-27	106.427	pfam07714	PK_Tyr_Ser-Thr	C	cl47985
Q#31 - >HORVU.MOREX.r3.4HG0342860.1.V3	superfamily	462242	24	221	2.74216e-27	106.427	cl47985	PK_Tyr_Ser-Thr superfamily	C	-
Q#32 - >HORVU.MOREX.r3.4HG0380570.1.V3	specific	459660	20	275	5.4429e-68	214.03	pfam00069	Pkinase	-	cl47491
Q#32 - >HORVU.MOREX.r3.4HG0380570.1.V3	superfamily	459660	20	275	5.4429e-68	214.03	cl47491	Pkinase superfamily	-	-
Q#32 - >HORVU.MOREX.r3.4HG0380570.1.V3	non-specific	462242	21	272	8.43906e-33	122.99	pfam07714	PK_Tyr_Ser-Thr	-	cl47985
Q#32 - >HORVU.MOREX.r3.4HG0380570.1.V3	superfamily	462242	21	272	8.43906e-33	122.99	cl47985	PK_Tyr_Ser-Thr superfamily	-	-
Q#32 - >HORVU.MOREX.r3.4HG0380570.1.V3	specific	427528	317	373	6.05442e-23	89.4671	pfam03822	NAF	-	cl17070
Q#32 - >HORVU.MOREX.r3.4HG0380570.1.V3	superfamily	473060	317	373	6.05442e-23	89.4671	cl17070	AMPKA_C_like superfamily	-	-
Q#32 - >HORVU.MOREX.r3.4HG0380570.1.V3	non-specific	405254	22	221	2.82043e-06	46.7207	pfam14531	Kinase-like	-	cl26012
Q#32 - >HORVU.MOREX.r3.4HG0380570.1.V3	superfamily	405254	22	221	2.82043e-06	46.7207	cl26012	Kinase-like superfamily	-	-
Q#32 - >HORVU.MOREX.r3.4HG0380570.1.V3	non-specific	428872	56	155	0.00442483	36.599	pfam06293	Kdo	NC	cl21453
Q#32 - >HORVU.MOREX.r3.4HG0380570.1.V3	superfamily	473864	56	155	0.00442483	36.599	cl21453	PKc_like superfamily	NC	-
Q#33 - >HORVU.MOREX.r3.5HG0449270.1.V3	specific	459660	74	332	3.61046e-79	246.387	pfam00069	Pkinase	-	cl47491
Q#33 - >HORVU.MOREX.r3.5HG0449270.1.V3	superfamily	459660	74	332	3.61046e-79	246.387	cl47491	Pkinase superfamily	-	-
Q#33 - >HORVU.MOREX.r3.5HG0449270.1.V3	non-specific	462242	75	288	1.04804e-18	84.0852	pfam07714	PK_Tyr_Ser-Thr	-	cl47985
Q#33 - >HORVU.MOREX.r3.5HG0449270.1.V3	superfamily	462242	75	288	1.04804e-18	84.0852	cl47985	PK_Tyr_Ser-Thr superfamily	-	-
Q#33 - >HORVU.MOREX.r3.5HG0449270.1.V3	specific	463900	449	510	1.01841e-12	61.5005	pfam13499	EF-hand_7	-	cl38414
Q#33 - >HORVU.MOREX.r3.5HG0449270.1.V3	superfamily	463900	449	510	1.01841e-12	61.5005	cl38414	EF-hand_7 superfamily	-	-
Q#33 - >HORVU.MOREX.r3.5HG0449270.1.V3	specific	463900	378	439	1.92808e-11	57.6485	pfam13499	EF-hand_7	-	cl38414
Q#33 - >HORVU.MOREX.r3.5HG0449270.1.V3	superfamily	463900	378	439	1.92808e-11	57.6485	cl38414	EF-hand_7 superfamily	-	-
Q#33 - >HORVU.MOREX.r3.5HG0449270.1.V3	non-specific	463869	380	408	7.00532e-06	41.008	pfam13405	EF-hand_6	-	cl38409
Q#33 - >HORVU.MOREX.r3.5HG0449270.1.V3	superfamily	463869	380	408	7.00532e-06	41.008	cl38409	EF-hand_6 superfamily	-	-
Q#33 - >HORVU.MOREX.r3.5HG0449270.1.V3	non-specific	404678	391	443	3.45117e-05	39.6057	pfam13833	EF-hand_8	-	cl08302
Q#33 - >HORVU.MOREX.r3.5HG0449270.1.V3	superfamily	415501	391	443	3.45117e-05	39.6057	cl08302	EFh superfamily	-	-
Q#33 - >HORVU.MOREX.r3.5HG0449270.1.V3	non-specific	425435	485	511	4.78329e-05	38.5358	pfam00036	EF-hand_1	-	cl37953
Q#33 - >HORVU.MOREX.r3.5HG0449270.1.V3	superfamily	425435	485	511	4.78329e-05	38.5358	cl37953	EF-hand_1 superfamily	-	-
Q#33 - >HORVU.MOREX.r3.5HG0449270.1.V3	non-specific	404678	464	510	0.00011241	38.0649	pfam13833	EF-hand_8	-	cl08302
Q#33 - >HORVU.MOREX.r3.5HG0449270.1.V3	superfamily	415501	464	510	0.00011241	38.0649	cl08302	EFh superfamily	-	-
Q#33 - >HORVU.MOREX.r3.5HG0449270.1.V3	non-specific	463869	454	480	0.000487311	35.6152	pfam13405	EF-hand_6	-	cl38409
Q#33 - >HORVU.MOREX.r3.5HG0449270.1.V3	superfamily	463869	454	480	0.000487311	35.6152	cl38409	EF-hand_6 superfamily	-	-
Q#33 - >HORVU.MOREX.r3.5HG0449270.1.V3	non-specific	425435	380	407	0.00103562	34.6838	pfam00036	EF-hand_1	-	cl37953
Q#33 - >HORVU.MOREX.r3.5HG0449270.1.V3	superfamily	425435	380	407	0.00103562	34.6838	cl37953	EF-hand_1 superfamily	-	-
Q#33 - >HORVU.MOREX.r3.5HG0449270.1.V3	non-specific	433035	382	402	0.00401539	33.0617	pfam13202	EF-hand_5	-	cl23632
Q#33 - >HORVU.MOREX.r3.5HG0449270.1.V3	superfamily	433035	382	402	0.00401539	33.0617	cl23632	EF-hand_5 superfamily	-	-
Q#33 - >HORVU.MOREX.r3.5HG0449270.1.V3	non-specific	433035	454	474	0.00443012	33.0617	pfam13202	EF-hand_5	-	cl23632
Q#33 - >HORVU.MOREX.r3.5HG0449270.1.V3	superfamily	433035	454	474	0.00443012	33.0617	cl23632	EF-hand_5 superfamily	-	-
Q#33 - >HORVU.MOREX.r3.5HG0449270.1.V3	non-specific	425435	454	477	0.00685065	32.3726	pfam00036	EF-hand_1	-	cl37953
Q#33 - >HORVU.MOREX.r3.5HG0449270.1.V3	non-specific	433035	492	509	0.00953834	31.9061	pfam13202	EF-hand_5	N	cl23632
Q#34 - >HORVU.MOREX.r3.5HG0517190.1.V3	specific	459660	120	378	7.86167e-74	233.29	pfam00069	Pkinase	-	cl47491
Q#34 - >HORVU.MOREX.r3.5HG0517190.1.V3	superfamily	459660	120	378	7.86167e-74	233.29	cl47491	Pkinase superfamily	-	-
Q#34 - >HORVU.MOREX.r3.5HG0517190.1.V3	non-specific	462242	121	336	1.08817e-21	92.9448	pfam07714	PK_Tyr_Ser-Thr	-	cl47985
Q#34 - >HORVU.MOREX.r3.5HG0517190.1.V3	superfamily	462242	121	336	1.08817e-21	92.9448	cl47985	PK_Tyr_Ser-Thr superfamily	-	-
Q#34 - >HORVU.MOREX.r3.5HG0517190.1.V3	specific	463900	495	557	9.03919e-18	75.7529	pfam13499	EF-hand_7	-	cl38414
Q#34 - >HORVU.MOREX.r3.5HG0517190.1.V3	superfamily	463900	495	557	9.03919e-18	75.7529	cl38414	EF-hand_7 superfamily	-	-
Q#34 - >HORVU.MOREX.r3.5HG0517190.1.V3	specific	463900	426	487	3.03461e-12	59.9597	pfam13499	EF-hand_7	-	cl38414
Q#34 - >HORVU.MOREX.r3.5HG0517190.1.V3	superfamily	463900	426	487	3.03461e-12	59.9597	cl38414	EF-hand_7 superfamily	-	-
Q#34 - >HORVU.MOREX.r3.5HG0517190.1.V3	non-specific	463869	426	454	8.46247e-07	43.7044	pfam13405	EF-hand_6	-	cl38409
Q#34 - >HORVU.MOREX.r3.5HG0517190.1.V3	superfamily	463869	426	454	8.46247e-07	43.7044	cl38409	EF-hand_6 superfamily	-	-
Q#34 - >HORVU.MOREX.r3.5HG0517190.1.V3	non-specific	404678	438	484	1.73334e-06	43.4577	pfam13833	EF-hand_8	-	cl08302
Q#34 - >HORVU.MOREX.r3.5HG0517190.1.V3	superfamily	415501	438	484	1.73334e-06	43.4577	cl08302	EFh superfamily	-	-
Q#34 - >HORVU.MOREX.r3.5HG0517190.1.V3	non-specific	425435	531	558	2.68572e-06	42.3878	pfam00036	EF-hand_1	-	cl37953
Q#34 - >HORVU.MOREX.r3.5HG0517190.1.V3	superfamily	425435	531	558	2.68572e-06	42.3878	cl37953	EF-hand_1 superfamily	-	-
Q#34 - >HORVU.MOREX.r3.5HG0517190.1.V3	non-specific	425435	426	453	3.02098e-06	42.0026	pfam00036	EF-hand_1	-	cl37953
Q#34 - >HORVU.MOREX.r3.5HG0517190.1.V3	superfamily	425435	426	453	3.02098e-06	42.0026	cl37953	EF-hand_1 superfamily	-	-
Q#34 - >HORVU.MOREX.r3.5HG0517190.1.V3	non-specific	463869	497	526	3.08639e-06	42.1636	pfam13405	EF-hand_6	-	cl38409
Q#34 - >HORVU.MOREX.r3.5HG0517190.1.V3	superfamily	463869	497	526	3.08639e-06	42.1636	cl38409	EF-hand_6 superfamily	-	-
Q#34 - >HORVU.MOREX.r3.5HG0517190.1.V3	non-specific	404678	509	558	4.81426e-06	42.3021	pfam13833	EF-hand_8	-	cl08302
Q#34 - >HORVU.MOREX.r3.5HG0517190.1.V3	superfamily	415501	509	558	4.81426e-06	42.3021	cl08302	EFh superfamily	-	-
Q#34 - >HORVU.MOREX.r3.5HG0517190.1.V3	non-specific	425435	497	525	0.000213668	36.995	pfam00036	EF-hand_1	-	cl37953
Q#34 - >HORVU.MOREX.r3.5HG0517190.1.V3	non-specific	425435	461	489	0.000517406	35.8394	pfam00036	EF-hand_1	-	cl37953
Q#34 - >HORVU.MOREX.r3.5HG0517190.1.V3	non-specific	405254	172	366	0.000598841	40.1723	pfam14531	Kinase-like	N	cl26012
Q#34 - >HORVU.MOREX.r3.5HG0517190.1.V3	superfamily	405254	172	366	0.000598841	40.1723	cl26012	Kinase-like superfamily	N	-
Q#34 - >HORVU.MOREX.r3.5HG0517190.1.V3	non-specific	433035	426	447	0.00101867	34.9877	pfam13202	EF-hand_5	-	cl23632
Q#34 - >HORVU.MOREX.r3.5HG0517190.1.V3	superfamily	433035	426	447	0.00101867	34.9877	cl23632	EF-hand_5 superfamily	-	-
Q#34 - >HORVU.MOREX.r3.5HG0517190.1.V3	non-specific	404678	474	517	0.00583734	33.4425	pfam13833	EF-hand_8	-	cl08302
Q#34 - >HORVU.MOREX.r3.5HG0517190.1.V3	non-specific	433035	500	520	0.00699022	32.2913	pfam13202	EF-hand_5	-	cl23632
Q#34 - >HORVU.MOREX.r3.5HG0517190.1.V3	superfamily	433035	500	520	0.00699022	32.2913	cl23632	EF-hand_5 superfamily	-	-
Q#34 - >HORVU.MOREX.r3.5HG0517190.1.V3	non-specific	433035	532	556	0.00834371	32.2913	pfam13202	EF-hand_5	-	cl23632
Q#35 - >HORVU.MOREX.r3.5HG0495800.1.V3	specific	459660	85	347	1.39566e-61	200.548	pfam00069	Pkinase	-	cl47491
Q#35 - >HORVU.MOREX.r3.5HG0495800.1.V3	superfamily	459660	85	347	1.39566e-61	200.548	cl47491	Pkinase superfamily	-	-
Q#35 - >HORVU.MOREX.r3.5HG0495800.1.V3	non-specific	462242	86	344	4.16221e-19	85.2408	pfam07714	PK_Tyr_Ser-Thr	-	cl47985
Q#35 - >HORVU.MOREX.r3.5HG0495800.1.V3	superfamily	462242	86	344	4.16221e-19	85.2408	cl47985	PK_Tyr_Ser-Thr superfamily	-	-
Q#35 - >HORVU.MOREX.r3.5HG0495800.1.V3	specific	463900	464	528	4.56545e-16	70.7453	pfam13499	EF-hand_7	-	cl38414
Q#35 - >HORVU.MOREX.r3.5HG0495800.1.V3	superfamily	463900	464	528	4.56545e-16	70.7453	cl38414	EF-hand_7 superfamily	-	-
Q#35 - >HORVU.MOREX.r3.5HG0495800.1.V3	specific	463900	397	456	4.56917e-09	51.1001	pfam13499	EF-hand_7	-	cl38414
Q#35 - >HORVU.MOREX.r3.5HG0495800.1.V3	superfamily	463900	397	456	4.56917e-09	51.1001	cl38414	EF-hand_7 superfamily	-	-
Q#35 - >HORVU.MOREX.r3.5HG0495800.1.V3	non-specific	463900	428	491	1.36722e-07	46.863	pfam13499	EF-hand_7	-	cl38414
Q#35 - >HORVU.MOREX.r3.5HG0495800.1.V3	superfamily	463900	428	491	1.36722e-07	46.863	cl38414	EF-hand_7 superfamily	-	-
Q#35 - >HORVU.MOREX.r3.5HG0495800.1.V3	non-specific	404678	406	457	1.10806e-06	43.8429	pfam13833	EF-hand_8	-	cl08302
Q#35 - >HORVU.MOREX.r3.5HG0495800.1.V3	superfamily	415501	406	457	1.10806e-06	43.8429	cl08302	EFh superfamily	-	-
Q#35 - >HORVU.MOREX.r3.5HG0495800.1.V3	non-specific	463869	469	491	2.00351e-05	39.8524	pfam13405	EF-hand_6	-	cl38409
Q#35 - >HORVU.MOREX.r3.5HG0495800.1.V3	superfamily	463869	469	491	2.00351e-05	39.8524	cl38409	EF-hand_6 superfamily	-	-
Q#35 - >HORVU.MOREX.r3.5HG0495800.1.V3	non-specific	425435	503	529	2.01883e-05	39.6914	pfam00036	EF-hand_1	-	cl37953
Q#35 - >HORVU.MOREX.r3.5HG0495800.1.V3	superfamily	425435	503	529	2.01883e-05	39.6914	cl37953	EF-hand_1 superfamily	-	-
Q#35 - >HORVU.MOREX.r3.5HG0495800.1.V3	non-specific	404678	478	527	7.58768e-05	38.8353	pfam13833	EF-hand_8	-	cl08302
Q#35 - >HORVU.MOREX.r3.5HG0495800.1.V3	superfamily	415501	478	527	7.58768e-05	38.8353	cl08302	EFh superfamily	-	-
Q#35 - >HORVU.MOREX.r3.5HG0495800.1.V3	non-specific	425435	469	491	7.74585e-05	38.1506	pfam00036	EF-hand_1	-	cl37953
Q#35 - >HORVU.MOREX.r3.5HG0495800.1.V3	non-specific	428872	116	235	8.81067e-05	41.9918	pfam06293	Kdo	NC	cl21453
Q#35 - >HORVU.MOREX.r3.5HG0495800.1.V3	superfamily	473864	116	235	8.81067e-05	41.9918	cl21453	PKc_like superfamily	NC	-
Q#35 - >HORVU.MOREX.r3.5HG0495800.1.V3	non-specific	405254	199	335	9.55463e-05	42.4835	pfam14531	Kinase-like	N	cl26012
Q#35 - >HORVU.MOREX.r3.5HG0495800.1.V3	superfamily	405254	199	335	9.55463e-05	42.4835	cl26012	Kinase-like superfamily	N	-
Q#35 - >HORVU.MOREX.r3.5HG0495800.1.V3	non-specific	425435	397	420	0.000103992	37.7654	pfam00036	EF-hand_1	-	cl37953
Q#35 - >HORVU.MOREX.r3.5HG0495800.1.V3	superfamily	425435	397	420	0.000103992	37.7654	cl37953	EF-hand_1 superfamily	-	-
Q#35 - >HORVU.MOREX.r3.5HG0495800.1.V3	non-specific	463869	397	423	0.000213619	36.7708	pfam13405	EF-hand_6	-	cl38409
Q#35 - >HORVU.MOREX.r3.5HG0495800.1.V3	superfamily	463869	397	423	0.000213619	36.7708	cl38409	EF-hand_6 superfamily	-	-
Q#35 - >HORVU.MOREX.r3.5HG0495800.1.V3	non-specific	289529	387	452	0.000879088	36.9675	pfam12763	EF-hand_4	C	cl44380
Q#35 - >HORVU.MOREX.r3.5HG0495800.1.V3	superfamily	289529	387	452	0.000879088	36.9675	cl44380	EF-hand_4 superfamily	C	-
Q#35 - >HORVU.MOREX.r3.5HG0495800.1.V3	non-specific	433035	503	527	0.000885331	34.9877	pfam13202	EF-hand_5	-	cl23632
Q#35 - >HORVU.MOREX.r3.5HG0495800.1.V3	superfamily	433035	503	527	0.000885331	34.9877	cl23632	EF-hand_5 superfamily	-	-
Q#35 - >HORVU.MOREX.r3.5HG0495800.1.V3	non-specific	426359	121	240	0.00789472	36.325	pfam01636	APH	N	cl37506
Q#35 - >HORVU.MOREX.r3.5HG0495800.1.V3	superfamily	426359	121	240	0.00789472	36.325	cl37506	APH superfamily	N	-
Q#35 - >HORVU.MOREX.r3.5HG0495800.1.V3	non-specific	433035	397	417	0.00954813	31.9061	pfam13202	EF-hand_5	-	cl23632
Q#35 - >HORVU.MOREX.r3.5HG0495800.1.V3	superfamily	433035	397	417	0.00954813	31.9061	cl23632	EF-hand_5 superfamily	-	-
Q#36 - >HORVU.MOREX.r3.5HG0450250.1.V3	specific	459660	157	415	8.71367e-79	247.157	pfam00069	Pkinase	-	cl47491
Q#36 - >HORVU.MOREX.r3.5HG0450250.1.V3	superfamily	459660	157	415	8.71367e-79	247.157	cl47491	Pkinase superfamily	-	-
Q#36 - >HORVU.MOREX.r3.5HG0450250.1.V3	non-specific	462242	159	372	1.17981e-22	96.0264	pfam07714	PK_Tyr_Ser-Thr	-	cl47985
Q#36 - >HORVU.MOREX.r3.5HG0450250.1.V3	superfamily	462242	159	372	1.17981e-22	96.0264	cl47985	PK_Tyr_Ser-Thr superfamily	-	-
Q#36 - >HORVU.MOREX.r3.5HG0450250.1.V3	specific	463900	532	593	4.11665e-15	68.4341	pfam13499	EF-hand_7	-	cl38414
Q#36 - >HORVU.MOREX.r3.5HG0450250.1.V3	superfamily	463900	532	593	4.11665e-15	68.4341	cl38414	EF-hand_7 superfamily	-	-
Q#36 - >HORVU.MOREX.r3.5HG0450250.1.V3	specific	463900	463	524	4.2745e-11	56.8781	pfam13499	EF-hand_7	-	cl38414
Q#36 - >HORVU.MOREX.r3.5HG0450250.1.V3	superfamily	463900	463	524	4.2745e-11	56.8781	cl38414	EF-hand_7 superfamily	-	-
Q#36 - >HORVU.MOREX.r3.5HG0450250.1.V3	non-specific	404678	546	593	1.3327e-07	46.5393	pfam13833	EF-hand_8	-	cl08302
Q#36 - >HORVU.MOREX.r3.5HG0450250.1.V3	superfamily	415501	546	593	1.3327e-07	46.5393	cl08302	EFh superfamily	-	-
Q#36 - >HORVU.MOREX.r3.5HG0450250.1.V3	non-specific	463900	496	559	2.15445e-07	46.4778	pfam13499	EF-hand_7	-	cl38414
Q#36 - >HORVU.MOREX.r3.5HG0450250.1.V3	superfamily	463900	496	559	2.15445e-07	46.4778	cl38414	EF-hand_7 superfamily	-	-
Q#36 - >HORVU.MOREX.r3.5HG0450250.1.V3	non-specific	425435	463	490	6.51344e-07	43.9286	pfam00036	EF-hand_1	-	cl37953
Q#36 - >HORVU.MOREX.r3.5HG0450250.1.V3	superfamily	425435	463	490	6.51344e-07	43.9286	cl37953	EF-hand_1 superfamily	-	-
Q#36 - >HORVU.MOREX.r3.5HG0450250.1.V3	non-specific	463869	535	563	1.05443e-06	43.3192	pfam13405	EF-hand_6	-	cl38409
Q#36 - >HORVU.MOREX.r3.5HG0450250.1.V3	superfamily	463869	535	563	1.05443e-06	43.3192	cl38409	EF-hand_6 superfamily	-	-
Q#36 - >HORVU.MOREX.r3.5HG0450250.1.V3	non-specific	425435	568	595	2.44541e-06	42.3878	pfam00036	EF-hand_1	-	cl37953
Q#36 - >HORVU.MOREX.r3.5HG0450250.1.V3	superfamily	425435	568	595	2.44541e-06	42.3878	cl37953	EF-hand_1 superfamily	-	-
Q#36 - >HORVU.MOREX.r3.5HG0450250.1.V3	non-specific	463869	463	491	7.87004e-06	41.008	pfam13405	EF-hand_6	-	cl38409
Q#36 - >HORVU.MOREX.r3.5HG0450250.1.V3	superfamily	463869	463	491	7.87004e-06	41.008	cl38409	EF-hand_6 superfamily	-	-
Q#36 - >HORVU.MOREX.r3.5HG0450250.1.V3	non-specific	404678	475	526	0.000118332	38.4501	pfam13833	EF-hand_8	-	cl08302
Q#36 - >HORVU.MOREX.r3.5HG0450250.1.V3	superfamily	415501	475	526	0.000118332	38.4501	cl08302	EFh superfamily	-	-
Q#36 - >HORVU.MOREX.r3.5HG0450250.1.V3	non-specific	425435	534	559	0.00015982	37.3802	pfam00036	EF-hand_1	-	cl37953
Q#36 - >HORVU.MOREX.r3.5HG0450250.1.V3	non-specific	433035	535	557	0.000354257	36.1433	pfam13202	EF-hand_5	-	cl23632
Q#36 - >HORVU.MOREX.r3.5HG0450250.1.V3	superfamily	433035	535	557	0.000354257	36.1433	cl23632	EF-hand_5 superfamily	-	-
Q#36 - >HORVU.MOREX.r3.5HG0450250.1.V3	non-specific	433035	463	485	0.000677192	35.3729	pfam13202	EF-hand_5	-	cl23632
Q#36 - >HORVU.MOREX.r3.5HG0450250.1.V3	superfamily	433035	463	485	0.000677192	35.3729	cl23632	EF-hand_5 superfamily	-	-
Q#36 - >HORVU.MOREX.r3.5HG0450250.1.V3	non-specific	404678	443	489	0.00256185	34.5981	pfam13833	EF-hand_8	-	cl08302
Q#36 - >HORVU.MOREX.r3.5HG0450250.1.V3	non-specific	425435	498	522	0.00305181	33.5282	pfam00036	EF-hand_1	-	cl37953
Q#36 - >HORVU.MOREX.r3.5HG0450250.1.V3	non-specific	433035	569	593	0.00708875	32.6765	pfam13202	EF-hand_5	-	cl23632
Q#37 - >HORVU.MOREX.r3.5HG0517140.1.V3	specific	459660	159	417	9.43348e-77	241.764	pfam00069	Pkinase	-	cl47491
Q#37 - >HORVU.MOREX.r3.5HG0517140.1.V3	superfamily	459660	159	417	9.43348e-77	241.764	cl47491	Pkinase superfamily	-	-
Q#37 - >HORVU.MOREX.r3.5HG0517140.1.V3	non-specific	462242	161	360	1.91273e-21	92.1744	pfam07714	PK_Tyr_Ser-Thr	C	cl47985
Q#37 - >HORVU.MOREX.r3.5HG0517140.1.V3	superfamily	462242	161	360	1.91273e-21	92.1744	cl47985	PK_Tyr_Ser-Thr superfamily	C	-
Q#37 - >HORVU.MOREX.r3.5HG0517140.1.V3	specific	463900	534	598	2.57078e-16	71.9009	pfam13499	EF-hand_7	-	cl38414
Q#37 - >HORVU.MOREX.r3.5HG0517140.1.V3	superfamily	463900	534	598	2.57078e-16	71.9009	cl38414	EF-hand_7 superfamily	-	-
Q#37 - >HORVU.MOREX.r3.5HG0517140.1.V3	specific	463900	465	526	7.90976e-13	61.8857	pfam13499	EF-hand_7	-	cl38414
Q#37 - >HORVU.MOREX.r3.5HG0517140.1.V3	superfamily	463900	465	526	7.90976e-13	61.8857	cl38414	EF-hand_7 superfamily	-	-
Q#37 - >HORVU.MOREX.r3.5HG0517140.1.V3	non-specific	404678	548	599	2.02313e-09	51.9321	pfam13833	EF-hand_8	-	cl08302
Q#37 - >HORVU.MOREX.r3.5HG0517140.1.V3	superfamily	415501	548	599	2.02313e-09	51.9321	cl08302	EFh superfamily	-	-
Q#37 - >HORVU.MOREX.r3.5HG0517140.1.V3	non-specific	463900	498	558	7.37981e-08	47.6334	pfam13499	EF-hand_7	-	cl38414
Q#37 - >HORVU.MOREX.r3.5HG0517140.1.V3	superfamily	463900	498	558	7.37981e-08	47.6334	cl38414	EF-hand_7 superfamily	-	-
Q#37 - >HORVU.MOREX.r3.5HG0517140.1.V3	non-specific	425435	573	599	1.18086e-07	46.2398	pfam00036	EF-hand_1	-	cl37953
Q#37 - >HORVU.MOREX.r3.5HG0517140.1.V3	superfamily	425435	573	599	1.18086e-07	46.2398	cl37953	EF-hand_1 superfamily	-	-
Q#37 - >HORVU.MOREX.r3.5HG0517140.1.V3	non-specific	404678	477	528	3.5427e-07	45.3837	pfam13833	EF-hand_8	-	cl08302
Q#37 - >HORVU.MOREX.r3.5HG0517140.1.V3	superfamily	415501	477	528	3.5427e-07	45.3837	cl08302	EFh superfamily	-	-
Q#37 - >HORVU.MOREX.r3.5HG0517140.1.V3	non-specific	425435	465	492	5.33571e-07	44.3138	pfam00036	EF-hand_1	-	cl37953
Q#37 - >HORVU.MOREX.r3.5HG0517140.1.V3	superfamily	425435	465	492	5.33571e-07	44.3138	cl37953	EF-hand_1 superfamily	-	-
Q#37 - >HORVU.MOREX.r3.5HG0517140.1.V3	non-specific	463869	465	493	3.83269e-06	41.7784	pfam13405	EF-hand_6	-	cl38409
Q#37 - >HORVU.MOREX.r3.5HG0517140.1.V3	superfamily	463869	465	493	3.83269e-06	41.7784	cl38409	EF-hand_6 superfamily	-	-
Q#37 - >HORVU.MOREX.r3.5HG0517140.1.V3	non-specific	463869	537	565	1.05262e-05	40.6228	pfam13405	EF-hand_6	-	cl38409
Q#37 - >HORVU.MOREX.r3.5HG0517140.1.V3	superfamily	463869	537	565	1.05262e-05	40.6228	cl38409	EF-hand_6 superfamily	-	-
Q#37 - >HORVU.MOREX.r3.5HG0517140.1.V3	non-specific	425435	536	564	0.000301601	36.6098	pfam00036	EF-hand_1	-	cl37953
Q#37 - >HORVU.MOREX.r3.5HG0517140.1.V3	non-specific	405254	244	405	0.000755562	39.7871	pfam14531	Kinase-like	N	cl26012
Q#37 - >HORVU.MOREX.r3.5HG0517140.1.V3	superfamily	405254	244	405	0.000755562	39.7871	cl26012	Kinase-like superfamily	N	-
Q#37 - >HORVU.MOREX.r3.5HG0517140.1.V3	non-specific	433035	465	486	0.00114677	34.6025	pfam13202	EF-hand_5	-	cl23632
Q#37 - >HORVU.MOREX.r3.5HG0517140.1.V3	superfamily	433035	465	486	0.00114677	34.6025	cl23632	EF-hand_5 superfamily	-	-
Q#37 - >HORVU.MOREX.r3.5HG0517140.1.V3	non-specific	433035	539	558	0.00160147	34.2173	pfam13202	EF-hand_5	-	cl23632
Q#37 - >HORVU.MOREX.r3.5HG0517140.1.V3	superfamily	433035	539	558	0.00160147	34.2173	cl23632	EF-hand_5 superfamily	-	-
Q#37 - >HORVU.MOREX.r3.5HG0517140.1.V3	non-specific	425435	500	524	0.00295259	33.5282	pfam00036	EF-hand_1	-	cl37953
Q#37 - >HORVU.MOREX.r3.5HG0517140.1.V3	non-specific	404678	445	491	0.00514606	33.8277	pfam13833	EF-hand_8	-	cl08302
Q#37 - >HORVU.MOREX.r3.5HG0517140.1.V3	non-specific	433035	573	597	0.00967593	32.2913	pfam13202	EF-hand_5	-	cl23632
Q#38 - >HORVU.MOREX.r3.5HG0462150.1.V3	specific	459660	84	342	2.81599e-75	235.601	pfam00069	Pkinase	-	cl47491
Q#38 - >HORVU.MOREX.r3.5HG0462150.1.V3	superfamily	459660	84	342	2.81599e-75	235.601	cl47491	Pkinase superfamily	-	-
Q#38 - >HORVU.MOREX.r3.5HG0462150.1.V3	non-specific	462242	85	285	4.63799e-26	105.271	pfam07714	PK_Tyr_Ser-Thr	C	cl47985
Q#38 - >HORVU.MOREX.r3.5HG0462150.1.V3	superfamily	462242	85	285	4.63799e-26	105.271	cl47985	PK_Tyr_Ser-Thr superfamily	C	-
Q#38 - >HORVU.MOREX.r3.5HG0462150.1.V3	specific	463900	459	522	5.69634e-17	73.4417	pfam13499	EF-hand_7	-	cl38414
Q#38 - >HORVU.MOREX.r3.5HG0462150.1.V3	superfamily	463900	459	522	5.69634e-17	73.4417	cl38414	EF-hand_7 superfamily	-	-
Q#38 - >HORVU.MOREX.r3.5HG0462150.1.V3	specific	463900	390	451	1.39763e-14	66.5081	pfam13499	EF-hand_7	-	cl38414
Q#38 - >HORVU.MOREX.r3.5HG0462150.1.V3	superfamily	463900	390	451	1.39763e-14	66.5081	cl38414	EF-hand_7 superfamily	-	-
Q#38 - >HORVU.MOREX.r3.5HG0462150.1.V3	non-specific	463900	425	487	4.54866e-08	48.0186	pfam13499	EF-hand_7	-	cl38414
Q#38 - >HORVU.MOREX.r3.5HG0462150.1.V3	superfamily	463900	425	487	4.54866e-08	48.0186	cl38414	EF-hand_7 superfamily	-	-
Q#38 - >HORVU.MOREX.r3.5HG0462150.1.V3	non-specific	404678	402	447	1.38022e-07	46.5393	pfam13833	EF-hand_8	-	cl08302
Q#38 - >HORVU.MOREX.r3.5HG0462150.1.V3	superfamily	415501	402	447	1.38022e-07	46.5393	cl08302	EFh superfamily	-	-
Q#38 - >HORVU.MOREX.r3.5HG0462150.1.V3	non-specific	425435	496	523	2.26237e-06	42.3878	pfam00036	EF-hand_1	-	cl37953
Q#38 - >HORVU.MOREX.r3.5HG0462150.1.V3	superfamily	425435	496	523	2.26237e-06	42.3878	cl37953	EF-hand_1 superfamily	-	-
Q#38 - >HORVU.MOREX.r3.5HG0462150.1.V3	non-specific	425435	390	417	6.08964e-06	41.2322	pfam00036	EF-hand_1	-	cl37953
Q#38 - >HORVU.MOREX.r3.5HG0462150.1.V3	superfamily	425435	390	417	6.08964e-06	41.2322	cl37953	EF-hand_1 superfamily	-	-
Q#38 - >HORVU.MOREX.r3.5HG0462150.1.V3	non-specific	463869	462	487	1.07769e-05	40.2376	pfam13405	EF-hand_6	-	cl38409
Q#38 - >HORVU.MOREX.r3.5HG0462150.1.V3	superfamily	463869	462	487	1.07769e-05	40.2376	cl38409	EF-hand_6 superfamily	-	-
Q#38 - >HORVU.MOREX.r3.5HG0462150.1.V3	non-specific	463869	390	418	2.03936e-05	39.4672	pfam13405	EF-hand_6	-	cl38409
Q#38 - >HORVU.MOREX.r3.5HG0462150.1.V3	superfamily	463869	390	418	2.03936e-05	39.4672	cl38409	EF-hand_6 superfamily	-	-
Q#38 - >HORVU.MOREX.r3.5HG0462150.1.V3	non-specific	425435	425	453	0.000123867	37.3802	pfam00036	EF-hand_1	-	cl37953
Q#38 - >HORVU.MOREX.r3.5HG0462150.1.V3	non-specific	425435	465	489	0.000172976	36.995	pfam00036	EF-hand_1	-	cl37953
Q#38 - >HORVU.MOREX.r3.5HG0462150.1.V3	non-specific	404678	474	523	0.000660706	36.1389	pfam13833	EF-hand_8	-	cl08302
Q#38 - >HORVU.MOREX.r3.5HG0462150.1.V3	superfamily	415501	474	523	0.000660706	36.1389	cl08302	EFh superfamily	-	-
Q#38 - >HORVU.MOREX.r3.5HG0462150.1.V3	non-specific	433035	390	412	0.000910183	34.9877	pfam13202	EF-hand_5	-	cl23632
Q#38 - >HORVU.MOREX.r3.5HG0462150.1.V3	superfamily	433035	390	412	0.000910183	34.9877	cl23632	EF-hand_5 superfamily	-	-
Q#38 - >HORVU.MOREX.r3.5HG0462150.1.V3	non-specific	433035	462	484	0.00197754	33.8321	pfam13202	EF-hand_5	-	cl23632
Q#38 - >HORVU.MOREX.r3.5HG0462150.1.V3	superfamily	433035	462	484	0.00197754	33.8321	cl23632	EF-hand_5 superfamily	-	-
Q#38 - >HORVU.MOREX.r3.5HG0462150.1.V3	non-specific	289529	382	449	0.00218098	35.8119	pfam12763	EF-hand_4	C	cl44380
Q#38 - >HORVU.MOREX.r3.5HG0462150.1.V3	superfamily	289529	382	449	0.00218098	35.8119	cl44380	EF-hand_4 superfamily	C	-
Q#38 - >HORVU.MOREX.r3.5HG0462150.1.V3	non-specific	428872	160	215	0.0024202	37.3694	pfam06293	Kdo	NC	cl21453
Q#38 - >HORVU.MOREX.r3.5HG0462150.1.V3	superfamily	473864	160	215	0.0024202	37.3694	cl21453	PKc_like superfamily	NC	-
Q#38 - >HORVU.MOREX.r3.5HG0462150.1.V3	non-specific	433035	497	521	0.00655936	32.2913	pfam13202	EF-hand_5	-	cl23632
Q#38 - >HORVU.MOREX.r3.5HG0462150.1.V3	non-specific	463869	496	523	0.00828752	32.1484	pfam13405	EF-hand_6	-	cl38409
Q#39 - >HORVU.MOREX.r3.5HG0438740.1.V3	specific	459660	18	274	2.10867e-63	199.392	pfam00069	Pkinase	-	cl47491
Q#39 - >HORVU.MOREX.r3.5HG0438740.1.V3	superfamily	459660	18	274	2.10867e-63	199.392	cl47491	Pkinase superfamily	-	-
Q#39 - >HORVU.MOREX.r3.5HG0438740.1.V3	non-specific	462242	19	216	2.64271e-27	106.427	pfam07714	PK_Tyr_Ser-Thr	C	cl47985
Q#39 - >HORVU.MOREX.r3.5HG0438740.1.V3	superfamily	462242	19	216	2.64271e-27	106.427	cl47985	PK_Tyr_Ser-Thr superfamily	C	-
Q#40 - >HORVU.MOREX.r3.5HG0451470.1.V3	specific	459660	44	302	9.17894e-78	241.379	pfam00069	Pkinase	-	cl47491
Q#40 - >HORVU.MOREX.r3.5HG0451470.1.V3	superfamily	459660	44	302	9.17894e-78	241.379	cl47491	Pkinase superfamily	-	-
Q#40 - >HORVU.MOREX.r3.5HG0451470.1.V3	non-specific	462242	45	260	6.01383e-24	99.108	pfam07714	PK_Tyr_Ser-Thr	-	cl47985
Q#40 - >HORVU.MOREX.r3.5HG0451470.1.V3	superfamily	462242	45	260	6.01383e-24	99.108	cl47985	PK_Tyr_Ser-Thr superfamily	-	-
Q#40 - >HORVU.MOREX.r3.5HG0451470.1.V3	specific	463900	419	481	6.24782e-16	70.3601	pfam13499	EF-hand_7	-	cl38414
Q#40 - >HORVU.MOREX.r3.5HG0451470.1.V3	superfamily	463900	419	481	6.24782e-16	70.3601	cl38414	EF-hand_7 superfamily	-	-
Q#40 - >HORVU.MOREX.r3.5HG0451470.1.V3	specific	463900	350	411	1.17144e-12	61.1153	pfam13499	EF-hand_7	-	cl38414
Q#40 - >HORVU.MOREX.r3.5HG0451470.1.V3	superfamily	463900	350	411	1.17144e-12	61.1153	cl38414	EF-hand_7 superfamily	-	-
Q#40 - >HORVU.MOREX.r3.5HG0451470.1.V3	non-specific	463869	350	378	2.91855e-07	44.86	pfam13405	EF-hand_6	-	cl38409
Q#40 - >HORVU.MOREX.r3.5HG0451470.1.V3	superfamily	463869	350	378	2.91855e-07	44.86	cl38409	EF-hand_6 superfamily	-	-
Q#40 - >HORVU.MOREX.r3.5HG0451470.1.V3	non-specific	404678	362	412	4.73732e-07	44.9985	pfam13833	EF-hand_8	-	cl08302
Q#40 - >HORVU.MOREX.r3.5HG0451470.1.V3	superfamily	415501	362	412	4.73732e-07	44.9985	cl08302	EFh superfamily	-	-
Q#40 - >HORVU.MOREX.r3.5HG0451470.1.V3	non-specific	425435	455	482	8.99319e-07	43.5434	pfam00036	EF-hand_1	-	cl37953
Q#40 - >HORVU.MOREX.r3.5HG0451470.1.V3	superfamily	425435	455	482	8.99319e-07	43.5434	cl37953	EF-hand_1 superfamily	-	-
Q#40 - >HORVU.MOREX.r3.5HG0451470.1.V3	non-specific	425435	350	377	1.01152e-06	43.1582	pfam00036	EF-hand_1	-	cl37953
Q#40 - >HORVU.MOREX.r3.5HG0451470.1.V3	superfamily	425435	350	377	1.01152e-06	43.1582	cl37953	EF-hand_1 superfamily	-	-
Q#40 - >HORVU.MOREX.r3.5HG0451470.1.V3	non-specific	404678	433	482	5.15007e-06	41.9169	pfam13833	EF-hand_8	-	cl08302
Q#40 - >HORVU.MOREX.r3.5HG0451470.1.V3	superfamily	415501	433	482	5.15007e-06	41.9169	cl08302	EFh superfamily	-	-
Q#40 - >HORVU.MOREX.r3.5HG0451470.1.V3	non-specific	463869	421	450	1.13025e-05	40.2376	pfam13405	EF-hand_6	-	cl38409
Q#40 - >HORVU.MOREX.r3.5HG0451470.1.V3	superfamily	463869	421	450	1.13025e-05	40.2376	cl38409	EF-hand_6 superfamily	-	-
Q#40 - >HORVU.MOREX.r3.5HG0451470.1.V3	non-specific	425435	425	449	0.000158118	36.995	pfam00036	EF-hand_1	-	cl37953
Q#40 - >HORVU.MOREX.r3.5HG0451470.1.V3	non-specific	433035	350	371	0.000271771	36.1433	pfam13202	EF-hand_5	-	cl23632
Q#40 - >HORVU.MOREX.r3.5HG0451470.1.V3	superfamily	433035	350	371	0.000271771	36.1433	cl23632	EF-hand_5 superfamily	-	-
Q#40 - >HORVU.MOREX.r3.5HG0451470.1.V3	non-specific	433035	456	480	0.000625971	35.3729	pfam13202	EF-hand_5	-	cl23632
Q#40 - >HORVU.MOREX.r3.5HG0451470.1.V3	superfamily	433035	456	480	0.000625971	35.3729	cl23632	EF-hand_5 superfamily	-	-
Q#40 - >HORVU.MOREX.r3.5HG0451470.1.V3	non-specific	433035	422	444	0.00226636	33.8321	pfam13202	EF-hand_5	-	cl23632
Q#40 - >HORVU.MOREX.r3.5HG0451470.1.V3	non-specific	404678	330	376	0.00583082	33.4425	pfam13833	EF-hand_8	-	cl08302
Q#40 - >HORVU.MOREX.r3.5HG0451470.1.V3	non-specific	428872	104	183	0.00644784	36.2138	pfam06293	Kdo	NC	cl21453
Q#40 - >HORVU.MOREX.r3.5HG0451470.1.V3	superfamily	473864	104	183	0.00644784	36.2138	cl21453	PKc_like superfamily	NC	-
Q#40 - >HORVU.MOREX.r3.5HG0451470.1.V3	non-specific	425435	385	409	0.00676772	32.3726	pfam00036	EF-hand_1	-	cl37953
Q#41 - >HORVU.MOREX.r3.5HG0509060.1.V3	specific	459660	19	277	7.51641e-58	187.451	pfam00069	Pkinase	-	cl47491
Q#41 - >HORVU.MOREX.r3.5HG0509060.1.V3	superfamily	459660	19	277	7.51641e-58	187.451	cl47491	Pkinase superfamily	-	-
Q#41 - >HORVU.MOREX.r3.5HG0509060.1.V3	non-specific	462242	20	243	1.29281e-34	127.613	pfam07714	PK_Tyr_Ser-Thr	-	cl47985
Q#41 - >HORVU.MOREX.r3.5HG0509060.1.V3	superfamily	462242	20	243	1.29281e-34	127.613	cl47985	PK_Tyr_Ser-Thr superfamily	-	-
Q#41 - >HORVU.MOREX.r3.5HG0509060.1.V3	specific	427528	306	358	5.08014e-18	75.5999	pfam03822	NAF	-	cl17070
Q#41 - >HORVU.MOREX.r3.5HG0509060.1.V3	superfamily	473060	306	358	5.08014e-18	75.5999	cl17070	AMPKA_C_like superfamily	-	-
Q#41 - >HORVU.MOREX.r3.5HG0509060.1.V3	non-specific	405254	21	265	2.27097e-08	53.2691	pfam14531	Kinase-like	-	cl26012
Q#41 - >HORVU.MOREX.r3.5HG0509060.1.V3	superfamily	405254	21	265	2.27097e-08	53.2691	cl26012	Kinase-like superfamily	-	-
Q#41 - >HORVU.MOREX.r3.5HG0509060.1.V3	non-specific	428872	63	157	0.00632889	35.8286	pfam06293	Kdo	NC	cl21453
Q#41 - >HORVU.MOREX.r3.5HG0509060.1.V3	superfamily	473864	63	157	0.00632889	35.8286	cl21453	PKc_like superfamily	NC	-
Q#42 - >HORVU.MOREX.r3.5HG0483990.1.V3	specific	459660	16	271	7.99655e-69	216.341	pfam00069	Pkinase	-	cl47491
Q#42 - >HORVU.MOREX.r3.5HG0483990.1.V3	superfamily	459660	16	271	7.99655e-69	216.341	cl47491	Pkinase superfamily	-	-
Q#42 - >HORVU.MOREX.r3.5HG0483990.1.V3	non-specific	462242	17	267	4.91965e-31	117.983	pfam07714	PK_Tyr_Ser-Thr	-	cl47985
Q#42 - >HORVU.MOREX.r3.5HG0483990.1.V3	superfamily	462242	17	267	4.91965e-31	117.983	cl47985	PK_Tyr_Ser-Thr superfamily	-	-
Q#42 - >HORVU.MOREX.r3.5HG0483990.1.V3	specific	427528	304	364	2.19703e-17	74.0591	pfam03822	NAF	-	cl17070
Q#42 - >HORVU.MOREX.r3.5HG0483990.1.V3	superfamily	473060	304	364	2.19703e-17	74.0591	cl17070	AMPKA_C_like superfamily	-	-
Q#42 - >HORVU.MOREX.r3.5HG0483990.1.V3	non-specific	427143	27	161	8.09109e-09	54.162	pfam03109	ABC1	-	cl21453
Q#42 - >HORVU.MOREX.r3.5HG0483990.1.V3	superfamily	473864	27	161	8.09109e-09	54.162	cl21453	PKc_like superfamily	-	-
Q#42 - >HORVU.MOREX.r3.5HG0483990.1.V3	non-specific	405254	98	259	2.57992e-05	44.0243	pfam14531	Kinase-like	N	cl26012
Q#42 - >HORVU.MOREX.r3.5HG0483990.1.V3	superfamily	405254	98	259	2.57992e-05	44.0243	cl26012	Kinase-like superfamily	N	-
Q#43 - >HORVU.MOREX.r3.5HG0487690.1.V3	specific	459660	102	351	4.7097e-49	165.11	pfam00069	Pkinase	-	cl47491
Q#43 - >HORVU.MOREX.r3.5HG0487690.1.V3	superfamily	459660	102	351	4.7097e-49	165.11	cl47491	Pkinase superfamily	-	-
Q#43 - >HORVU.MOREX.r3.5HG0487690.1.V3	non-specific	462242	103	277	1.57103e-30	116.827	pfam07714	PK_Tyr_Ser-Thr	C	cl47985
Q#43 - >HORVU.MOREX.r3.5HG0487690.1.V3	superfamily	462242	103	277	1.57103e-30	116.827	cl47985	PK_Tyr_Ser-Thr superfamily	C	-
Q#43 - >HORVU.MOREX.r3.5HG0487690.1.V3	non-specific	427143	171	246	2.86242e-05	43.3764	pfam03109	ABC1	N	cl21453
Q#43 - >HORVU.MOREX.r3.5HG0487690.1.V3	superfamily	473864	171	246	2.86242e-05	43.3764	cl21453	PKc_like superfamily	N	-
Q#43 - >HORVU.MOREX.r3.5HG0487690.1.V3	non-specific	405254	204	278	0.00291539	37.4759	pfam14531	Kinase-like	N	cl26012
Q#43 - >HORVU.MOREX.r3.5HG0487690.1.V3	superfamily	405254	204	278	0.00291539	37.4759	cl26012	Kinase-like superfamily	N	-
Q#43 - >HORVU.MOREX.r3.5HG0487690.1.V3	non-specific	432484	95	242	0.00342418	37.469	pfam12330	Haspin_kinase	NC	cl21453
Q#44 - >HORVU.MOREX.r3.5HG0512820.1.V3	specific	459660	28	284	2.28543e-61	194.385	pfam00069	Pkinase	-	cl47491
Q#44 - >HORVU.MOREX.r3.5HG0512820.1.V3	superfamily	459660	28	284	2.28543e-61	194.385	cl47491	Pkinase superfamily	-	-
Q#44 - >HORVU.MOREX.r3.5HG0512820.1.V3	non-specific	462242	29	226	1.47244e-27	107.197	pfam07714	PK_Tyr_Ser-Thr	C	cl47985
Q#44 - >HORVU.MOREX.r3.5HG0512820.1.V3	superfamily	462242	29	226	1.47244e-27	107.197	cl47985	PK_Tyr_Ser-Thr superfamily	C	-
Q#45 - >HORVU.MOREX.r3.5HG0479090.1.V3	non-specific	459660	1	191	5.37126e-41	137.375	pfam00069	Pkinase	N	cl47491
Q#45 - >HORVU.MOREX.r3.5HG0479090.1.V3	superfamily	459660	1	191	5.37126e-41	137.375	cl47491	Pkinase superfamily	N	-
Q#45 - >HORVU.MOREX.r3.5HG0479090.1.V3	non-specific	462242	1	163	7.65391e-22	88.3224	pfam07714	PK_Tyr_Ser-Thr	N	cl47985
Q#45 - >HORVU.MOREX.r3.5HG0479090.1.V3	superfamily	462242	1	163	7.65391e-22	88.3224	cl47985	PK_Tyr_Ser-Thr superfamily	N	-
Q#46 - >HORVU.MOREX.r3.5HG0523860.1.V3	specific	459660	60	318	1.21728e-75	236.372	pfam00069	Pkinase	-	cl47491
Q#46 - >HORVU.MOREX.r3.5HG0523860.1.V3	superfamily	459660	60	318	1.21728e-75	236.372	cl47491	Pkinase superfamily	-	-
Q#46 - >HORVU.MOREX.r3.5HG0523860.1.V3	non-specific	462242	61	261	6.96312e-20	87.552	pfam07714	PK_Tyr_Ser-Thr	C	cl47985
Q#46 - >HORVU.MOREX.r3.5HG0523860.1.V3	superfamily	462242	61	261	6.96312e-20	87.552	cl47985	PK_Tyr_Ser-Thr superfamily	C	-
Q#46 - >HORVU.MOREX.r3.5HG0523860.1.V3	specific	463900	435	500	1.92054e-16	71.9009	pfam13499	EF-hand_7	-	cl38414
Q#46 - >HORVU.MOREX.r3.5HG0523860.1.V3	superfamily	463900	435	500	1.92054e-16	71.9009	cl38414	EF-hand_7 superfamily	-	-
Q#46 - >HORVU.MOREX.r3.5HG0523860.1.V3	specific	463900	365	425	7.72015e-10	53.0261	pfam13499	EF-hand_7	-	cl38414
Q#46 - >HORVU.MOREX.r3.5HG0523860.1.V3	superfamily	463900	365	425	7.72015e-10	53.0261	cl38414	EF-hand_7 superfamily	-	-
Q#46 - >HORVU.MOREX.r3.5HG0523860.1.V3	non-specific	404678	378	425	8.20397e-07	44.2281	pfam13833	EF-hand_8	-	cl08302
Q#46 - >HORVU.MOREX.r3.5HG0523860.1.V3	superfamily	415501	378	425	8.20397e-07	44.2281	cl08302	EFh superfamily	-	-
Q#46 - >HORVU.MOREX.r3.5HG0523860.1.V3	non-specific	405254	143	302	4.15113e-06	46.7207	pfam14531	Kinase-like	N	cl26012
Q#46 - >HORVU.MOREX.r3.5HG0523860.1.V3	superfamily	405254	143	302	4.15113e-06	46.7207	cl26012	Kinase-like superfamily	N	-
Q#46 - >HORVU.MOREX.r3.5HG0523860.1.V3	non-specific	425435	365	393	6.13164e-06	41.2322	pfam00036	EF-hand_1	-	cl37953
Q#46 - >HORVU.MOREX.r3.5HG0523860.1.V3	superfamily	425435	365	393	6.13164e-06	41.2322	cl37953	EF-hand_1 superfamily	-	-
Q#46 - >HORVU.MOREX.r3.5HG0523860.1.V3	non-specific	404678	449	500	1.16375e-05	41.1465	pfam13833	EF-hand_8	-	cl08302
Q#46 - >HORVU.MOREX.r3.5HG0523860.1.V3	superfamily	415501	449	500	1.16375e-05	41.1465	cl08302	EFh superfamily	-	-
Q#46 - >HORVU.MOREX.r3.5HG0523860.1.V3	non-specific	425435	478	501	2.94586e-05	39.3062	pfam00036	EF-hand_1	-	cl37953
Q#46 - >HORVU.MOREX.r3.5HG0523860.1.V3	superfamily	425435	478	501	2.94586e-05	39.3062	cl37953	EF-hand_1 superfamily	-	-
Q#46 - >HORVU.MOREX.r3.5HG0523860.1.V3	non-specific	425435	437	464	6.91951e-05	38.1506	pfam00036	EF-hand_1	-	cl37953
Q#46 - >HORVU.MOREX.r3.5HG0523860.1.V3	non-specific	463869	365	394	7.00523e-05	37.9264	pfam13405	EF-hand_6	-	cl38409
Q#46 - >HORVU.MOREX.r3.5HG0523860.1.V3	superfamily	463869	365	394	7.00523e-05	37.9264	cl38409	EF-hand_6 superfamily	-	-
Q#46 - >HORVU.MOREX.r3.5HG0523860.1.V3	non-specific	463869	438	463	0.000108987	37.5412	pfam13405	EF-hand_6	-	cl38409
Q#46 - >HORVU.MOREX.r3.5HG0523860.1.V3	superfamily	463869	438	463	0.000108987	37.5412	cl38409	EF-hand_6 superfamily	-	-
Q#46 - >HORVU.MOREX.r3.5HG0523860.1.V3	non-specific	463900	348	391	0.000304723	37.233	pfam13499	EF-hand_7	N	cl38414
Q#46 - >HORVU.MOREX.r3.5HG0523860.1.V3	non-specific	433035	482	499	0.00400073	33.0617	pfam13202	EF-hand_5	N	cl23632
Q#46 - >HORVU.MOREX.r3.5HG0523860.1.V3	superfamily	433035	482	499	0.00400073	33.0617	cl23632	EF-hand_5 superfamily	N	-
Q#46 - >HORVU.MOREX.r3.5HG0523860.1.V3	non-specific	433035	438	459	0.00454604	33.0617	pfam13202	EF-hand_5	-	cl23632
Q#47 - >HORVU.MOREX.r3.5HG0433220.1.V3	specific	459660	17	276	9.91611e-54	176.666	pfam00069	Pkinase	-	cl47491
Q#47 - >HORVU.MOREX.r3.5HG0433220.1.V3	superfamily	459660	17	276	9.91611e-54	176.666	cl47491	Pkinase superfamily	-	-
Q#47 - >HORVU.MOREX.r3.5HG0433220.1.V3	non-specific	462242	18	223	6.17066e-32	120.294	pfam07714	PK_Tyr_Ser-Thr	C	cl47985
Q#47 - >HORVU.MOREX.r3.5HG0433220.1.V3	superfamily	462242	18	223	6.17066e-32	120.294	cl47985	PK_Tyr_Ser-Thr superfamily	C	-
Q#47 - >HORVU.MOREX.r3.5HG0433220.1.V3	specific	427528	307	358	3.36137e-16	70.5923	pfam03822	NAF	-	cl17070
Q#47 - >HORVU.MOREX.r3.5HG0433220.1.V3	superfamily	473060	307	358	3.36137e-16	70.5923	cl17070	AMPKA_C_like superfamily	-	-
Q#47 - >HORVU.MOREX.r3.5HG0433220.1.V3	non-specific	405254	19	222	9.56931e-09	54.4247	pfam14531	Kinase-like	-	cl26012
Q#47 - >HORVU.MOREX.r3.5HG0433220.1.V3	superfamily	405254	19	222	9.56931e-09	54.4247	cl26012	Kinase-like superfamily	-	-
Q#47 - >HORVU.MOREX.r3.5HG0433220.1.V3	non-specific	428872	61	155	0.000301343	40.0658	pfam06293	Kdo	NC	cl21453
Q#47 - >HORVU.MOREX.r3.5HG0433220.1.V3	superfamily	473864	61	155	0.000301343	40.0658	cl21453	PKc_like superfamily	NC	-
Q#47 - >HORVU.MOREX.r3.5HG0433220.1.V3	non-specific	426359	80	173	0.00439356	36.7102	pfam01636	APH	N	cl37506
Q#47 - >HORVU.MOREX.r3.5HG0433220.1.V3	superfamily	426359	80	173	0.00439356	36.7102	cl37506	APH superfamily	N	-
Q#48 - >HORVU.MOREX.r3.5HG0464580.1.V3	specific	459660	12	267	1.18271e-60	195.155	pfam00069	Pkinase	-	cl47491
Q#48 - >HORVU.MOREX.r3.5HG0464580.1.V3	superfamily	459660	12	267	1.18271e-60	195.155	cl47491	Pkinase superfamily	-	-
Q#48 - >HORVU.MOREX.r3.5HG0464580.1.V3	non-specific	462242	13	263	1.21302e-41	146.488	pfam07714	PK_Tyr_Ser-Thr	-	cl47985
Q#48 - >HORVU.MOREX.r3.5HG0464580.1.V3	superfamily	462242	13	263	1.21302e-41	146.488	cl47985	PK_Tyr_Ser-Thr superfamily	-	-
Q#48 - >HORVU.MOREX.r3.5HG0464580.1.V3	specific	427528	313	368	4.52296e-26	97.9415	pfam03822	NAF	-	cl17070
Q#48 - >HORVU.MOREX.r3.5HG0464580.1.V3	superfamily	473060	313	368	4.52296e-26	97.9415	cl17070	AMPKA_C_like superfamily	-	-
Q#48 - >HORVU.MOREX.r3.5HG0464580.1.V3	non-specific	405254	20	255	4.39889e-07	49.4171	pfam14531	Kinase-like	-	cl26012
Q#48 - >HORVU.MOREX.r3.5HG0464580.1.V3	superfamily	405254	20	255	4.39889e-07	49.4171	cl26012	Kinase-like superfamily	-	-
Q#48 - >HORVU.MOREX.r3.5HG0464580.1.V3	non-specific	427143	18	166	3.00116e-05	43.3764	pfam03109	ABC1	-	cl21453
Q#48 - >HORVU.MOREX.r3.5HG0464580.1.V3	superfamily	473864	18	166	3.00116e-05	43.3764	cl21453	PKc_like superfamily	-	-
Q#49 - >HORVU.MOREX.r3.5HG0484020.1.V3	specific	459660	17	256	1.86066e-58	188.992	pfam00069	Pkinase	-	cl47491
Q#49 - >HORVU.MOREX.r3.5HG0484020.1.V3	superfamily	459660	17	256	1.86066e-58	188.992	cl47491	Pkinase superfamily	-	-
Q#49 - >HORVU.MOREX.r3.5HG0484020.1.V3	non-specific	462242	18	250	1.1893e-30	116.827	pfam07714	PK_Tyr_Ser-Thr	-	cl47985
Q#49 - >HORVU.MOREX.r3.5HG0484020.1.V3	superfamily	462242	18	250	1.1893e-30	116.827	cl47985	PK_Tyr_Ser-Thr superfamily	-	-
Q#49 - >HORVU.MOREX.r3.5HG0484020.1.V3	specific	427528	300	351	8.95187e-18	74.8295	pfam03822	NAF	-	cl17070
Q#49 - >HORVU.MOREX.r3.5HG0484020.1.V3	superfamily	473060	300	351	8.95187e-18	74.8295	cl17070	AMPKA_C_like superfamily	-	-
Q#49 - >HORVU.MOREX.r3.5HG0484020.1.V3	non-specific	405254	87	202	3.41039e-09	55.5803	pfam14531	Kinase-like	N	cl26012
Q#49 - >HORVU.MOREX.r3.5HG0484020.1.V3	superfamily	405254	87	202	3.41039e-09	55.5803	cl26012	Kinase-like superfamily	N	-
Q#49 - >HORVU.MOREX.r3.5HG0484020.1.V3	non-specific	428872	8	136	0.000921217	38.525	pfam06293	Kdo	C	cl21453
Q#49 - >HORVU.MOREX.r3.5HG0484020.1.V3	superfamily	473864	8	136	0.000921217	38.525	cl21453	PKc_like superfamily	C	-
Q#49 - >HORVU.MOREX.r3.5HG0484020.1.V3	non-specific	427143	71	145	0.00182334	37.9836	pfam03109	ABC1	N	cl21453
Q#49 - >HORVU.MOREX.r3.5HG0484020.1.V3	non-specific	426359	98	146	0.00262173	37.4806	pfam01636	APH	N	cl37506
Q#49 - >HORVU.MOREX.r3.5HG0484020.1.V3	superfamily	426359	98	146	0.00262173	37.4806	cl37506	APH superfamily	N	-
Q#50 - >HORVU.MOREX.r3.7HG0720050.1.V3	specific	459660	13	266	3.04191e-66	208.252	pfam00069	Pkinase	-	cl47491
Q#50 - >HORVU.MOREX.r3.7HG0720050.1.V3	superfamily	459660	13	266	3.04191e-66	208.252	cl47491	Pkinase superfamily	-	-
Q#50 - >HORVU.MOREX.r3.7HG0720050.1.V3	non-specific	462242	16	263	1.95919e-37	134.546	pfam07714	PK_Tyr_Ser-Thr	-	cl47985
Q#50 - >HORVU.MOREX.r3.7HG0720050.1.V3	superfamily	462242	16	263	1.95919e-37	134.546	cl47985	PK_Tyr_Ser-Thr superfamily	-	-
Q#50 - >HORVU.MOREX.r3.7HG0720050.1.V3	specific	427528	311	368	5.98593e-22	86.3855	pfam03822	NAF	-	cl17070
Q#50 - >HORVU.MOREX.r3.7HG0720050.1.V3	superfamily	473060	311	368	5.98593e-22	86.3855	cl17070	AMPKA_C_like superfamily	-	-
Q#50 - >HORVU.MOREX.r3.7HG0720050.1.V3	non-specific	405254	3	254	2.85361e-06	46.7207	pfam14531	Kinase-like	-	cl26012
Q#50 - >HORVU.MOREX.r3.7HG0720050.1.V3	superfamily	405254	3	254	2.85361e-06	46.7207	cl26012	Kinase-like superfamily	-	-
Q#51 - >HORVU.MOREX.r3.7HG0686030.1.V3	specific	459660	85	371	7.51639e-66	212.104	pfam00069	Pkinase	-	cl47491
Q#51 - >HORVU.MOREX.r3.7HG0686030.1.V3	superfamily	459660	85	371	7.51639e-66	212.104	cl47491	Pkinase superfamily	-	-
Q#51 - >HORVU.MOREX.r3.7HG0686030.1.V3	non-specific	462242	86	368	3.16161e-15	74.07	pfam07714	PK_Tyr_Ser-Thr	-	cl47985
Q#51 - >HORVU.MOREX.r3.7HG0686030.1.V3	superfamily	462242	86	368	3.16161e-15	74.07	cl47985	PK_Tyr_Ser-Thr superfamily	-	-
Q#51 - >HORVU.MOREX.r3.7HG0686030.1.V3	specific	463900	488	547	1.34544e-13	63.8117	pfam13499	EF-hand_7	-	cl38414
Q#51 - >HORVU.MOREX.r3.7HG0686030.1.V3	superfamily	463900	488	547	1.34544e-13	63.8117	cl38414	EF-hand_7 superfamily	-	-
Q#51 - >HORVU.MOREX.r3.7HG0686030.1.V3	specific	463900	421	478	5.379e-09	50.7149	pfam13499	EF-hand_7	-	cl38414
Q#51 - >HORVU.MOREX.r3.7HG0686030.1.V3	superfamily	463900	421	478	5.379e-09	50.7149	cl38414	EF-hand_7 superfamily	-	-
Q#51 - >HORVU.MOREX.r3.7HG0686030.1.V3	non-specific	404678	430	482	6.09482e-06	41.9169	pfam13833	EF-hand_8	-	cl08302
Q#51 - >HORVU.MOREX.r3.7HG0686030.1.V3	superfamily	415501	430	482	6.09482e-06	41.9169	cl08302	EFh superfamily	-	-
Q#51 - >HORVU.MOREX.r3.7HG0686030.1.V3	non-specific	425435	522	548	9.52421e-06	40.4618	pfam00036	EF-hand_1	-	cl37953
Q#51 - >HORVU.MOREX.r3.7HG0686030.1.V3	superfamily	425435	522	548	9.52421e-06	40.4618	cl37953	EF-hand_1 superfamily	-	-
Q#51 - >HORVU.MOREX.r3.7HG0686030.1.V3	non-specific	405254	208	359	0.000159351	41.7131	pfam14531	Kinase-like	N	cl26012
Q#51 - >HORVU.MOREX.r3.7HG0686030.1.V3	superfamily	405254	208	359	0.000159351	41.7131	cl26012	Kinase-like superfamily	N	-
Q#51 - >HORVU.MOREX.r3.7HG0686030.1.V3	non-specific	433035	491	513	0.000374618	36.1433	pfam13202	EF-hand_5	-	cl23632
Q#51 - >HORVU.MOREX.r3.7HG0686030.1.V3	superfamily	433035	491	513	0.000374618	36.1433	cl23632	EF-hand_5 superfamily	-	-
Q#51 - >HORVU.MOREX.r3.7HG0686030.1.V3	non-specific	463869	491	513	0.000375629	36.0004	pfam13405	EF-hand_6	C	cl38409
Q#51 - >HORVU.MOREX.r3.7HG0686030.1.V3	superfamily	463869	491	513	0.000375629	36.0004	cl38409	EF-hand_6 superfamily	C	-
Q#51 - >HORVU.MOREX.r3.7HG0686030.1.V3	non-specific	425435	491	513	0.000385666	36.2246	pfam00036	EF-hand_1	C	cl37953
Q#51 - >HORVU.MOREX.r3.7HG0686030.1.V3	non-specific	428872	156	270	0.000749321	39.2954	pfam06293	Kdo	N	cl21453
Q#51 - >HORVU.MOREX.r3.7HG0686030.1.V3	superfamily	473864	156	270	0.000749321	39.2954	cl21453	PKc_like superfamily	N	-
Q#51 - >HORVU.MOREX.r3.7HG0686030.1.V3	non-specific	425435	421	443	0.00322664	33.5282	pfam00036	EF-hand_1	-	cl37953
Q#51 - >HORVU.MOREX.r3.7HG0686030.1.V3	superfamily	425435	421	443	0.00322664	33.5282	cl37953	EF-hand_1 superfamily	-	-
Q#51 - >HORVU.MOREX.r3.7HG0686030.1.V3	non-specific	463869	418	447	0.00336931	33.304	pfam13405	EF-hand_6	-	cl38409
Q#51 - >HORVU.MOREX.r3.7HG0686030.1.V3	superfamily	463869	418	447	0.00336931	33.304	cl38409	EF-hand_6 superfamily	-	-
Q#51 - >HORVU.MOREX.r3.7HG0686030.1.V3	non-specific	426359	154	280	0.00513783	37.0954	pfam01636	APH	-	cl37506
Q#51 - >HORVU.MOREX.r3.7HG0686030.1.V3	superfamily	426359	154	280	0.00513783	37.0954	cl37506	APH superfamily	-	-
Q#51 - >HORVU.MOREX.r3.7HG0686030.1.V3	non-specific	433035	522	546	0.00653252	32.6765	pfam13202	EF-hand_5	-	cl23632
Q#51 - >HORVU.MOREX.r3.7HG0686030.1.V3	non-specific	404678	502	547	0.0076221	33.0573	pfam13833	EF-hand_8	-	cl08302
Q#51 - >HORVU.MOREX.r3.7HG0686030.1.V3	superfamily	415501	502	547	0.0076221	33.0573	cl08302	EFh superfamily	-	-
Q#52 - >HORVU.MOREX.r3.7HG0721290.1.V3	specific	459660	172	434	6.97372e-62	202.859	pfam00069	Pkinase	-	cl47491
Q#52 - >HORVU.MOREX.r3.7HG0721290.1.V3	superfamily	459660	172	434	6.97372e-62	202.859	cl47491	Pkinase superfamily	-	-
Q#52 - >HORVU.MOREX.r3.7HG0721290.1.V3	non-specific	462242	173	377	3.29184e-34	129.154	pfam07714	PK_Tyr_Ser-Thr	C	cl47985
Q#52 - >HORVU.MOREX.r3.7HG0721290.1.V3	superfamily	462242	173	377	3.29184e-34	129.154	cl47985	PK_Tyr_Ser-Thr superfamily	C	-
Q#52 - >HORVU.MOREX.r3.7HG0721290.1.V3	non-specific	427143	189	335	7.02079e-06	45.6876	pfam03109	ABC1	-	cl21453
Q#52 - >HORVU.MOREX.r3.7HG0721290.1.V3	superfamily	473864	189	335	7.02079e-06	45.6876	cl21453	PKc_like superfamily	-	-
Q#52 - >HORVU.MOREX.r3.7HG0721290.1.V3	non-specific	428872	251	322	1.41187e-05	44.6882	pfam06293	Kdo	NC	cl21453
Q#52 - >HORVU.MOREX.r3.7HG0721290.1.V3	non-specific	405254	280	422	0.000292992	41.3279	pfam14531	Kinase-like	N	cl26012
Q#52 - >HORVU.MOREX.r3.7HG0721290.1.V3	superfamily	405254	280	422	0.000292992	41.3279	cl26012	Kinase-like superfamily	N	-
Q#52 - >HORVU.MOREX.r3.7HG0721290.1.V3	non-specific	282904	24	107	0.00947384	37.2032	pfam05109	Herpes_BLLF1	NC	cl37540
Q#52 - >HORVU.MOREX.r3.7HG0721290.1.V3	superfamily	282904	24	107	0.00947384	37.2032	cl37540	Herpes_BLLF1 superfamily	NC	-
Q#53 - >HORVU.MOREX.r3.7HG0719220.1.V3	specific	459660	11	266	2.51018e-63	203.244	pfam00069	Pkinase	-	cl47491
Q#53 - >HORVU.MOREX.r3.7HG0719220.1.V3	superfamily	459660	11	266	2.51018e-63	203.244	cl47491	Pkinase superfamily	-	-
Q#53 - >HORVU.MOREX.r3.7HG0719220.1.V3	non-specific	462242	12	262	6.35588e-39	140.324	pfam07714	PK_Tyr_Ser-Thr	-	cl47985
Q#53 - >HORVU.MOREX.r3.7HG0719220.1.V3	superfamily	462242	12	262	6.35588e-39	140.324	cl47985	PK_Tyr_Ser-Thr superfamily	-	-
Q#53 - >HORVU.MOREX.r3.7HG0719220.1.V3	specific	427528	355	408	2.43242e-20	82.5335	pfam03822	NAF	-	cl17070
Q#53 - >HORVU.MOREX.r3.7HG0719220.1.V3	superfamily	473060	355	408	2.43242e-20	82.5335	cl17070	AMPKA_C_like superfamily	-	-
Q#53 - >HORVU.MOREX.r3.7HG0719220.1.V3	non-specific	405254	7	254	1.226e-09	57.5063	pfam14531	Kinase-like	-	cl26012
Q#53 - >HORVU.MOREX.r3.7HG0719220.1.V3	superfamily	405254	7	254	1.226e-09	57.5063	cl26012	Kinase-like superfamily	-	-
Q#53 - >HORVU.MOREX.r3.7HG0719220.1.V3	non-specific	427143	87	171	0.000111837	41.8356	pfam03109	ABC1	N	cl21453
Q#53 - >HORVU.MOREX.r3.7HG0719220.1.V3	superfamily	473864	87	171	0.000111837	41.8356	cl21453	PKc_like superfamily	N	-
Q#53 - >HORVU.MOREX.r3.7HG0719220.1.V3	non-specific	463512	85	153	0.00984103	35.3425	pfam12260	PIP49_C	C	cl48131
Q#53 - >HORVU.MOREX.r3.7HG0719220.1.V3	superfamily	463512	85	153	0.00984103	35.3425	cl48131	PIP49_C superfamily	C	-
Q#54 - >HORVU.MOREX.r3.7HG0642750.1.V3	specific	459660	36	294	1.07633e-63	204.785	pfam00069	Pkinase	-	cl47491
Q#54 - >HORVU.MOREX.r3.7HG0642750.1.V3	superfamily	459660	36	294	1.07633e-63	204.785	cl47491	Pkinase superfamily	-	-
Q#54 - >HORVU.MOREX.r3.7HG0642750.1.V3	non-specific	462242	38	291	1.86963e-34	128.383	pfam07714	PK_Tyr_Ser-Thr	-	cl47985
Q#54 - >HORVU.MOREX.r3.7HG0642750.1.V3	superfamily	462242	38	291	1.86963e-34	128.383	cl47985	PK_Tyr_Ser-Thr superfamily	-	-
Q#54 - >HORVU.MOREX.r3.7HG0642750.1.V3	non-specific	405254	119	282	1.92612e-06	47.4911	pfam14531	Kinase-like	N	cl26012
Q#54 - >HORVU.MOREX.r3.7HG0642750.1.V3	superfamily	405254	119	282	1.92612e-06	47.4911	cl26012	Kinase-like superfamily	N	-
Q#55 - >HORVU.MOREX.r3.1HG0092880.1.V3	specific	459660	74	332	1.97188e-71	225.201	pfam00069	Pkinase	-	cl47491
Q#55 - >HORVU.MOREX.r3.1HG0092880.1.V3	superfamily	459660	74	332	1.97188e-71	225.201	cl47491	Pkinase superfamily	-	-
Q#55 - >HORVU.MOREX.r3.1HG0092880.1.V3	non-specific	462242	75	329	1.28123e-22	95.256	pfam07714	PK_Tyr_Ser-Thr	-	cl47985
Q#55 - >HORVU.MOREX.r3.1HG0092880.1.V3	superfamily	462242	75	329	1.28123e-22	95.256	cl47985	PK_Tyr_Ser-Thr superfamily	-	-
Q#55 - >HORVU.MOREX.r3.1HG0092880.1.V3	specific	463900	449	512	2.89633e-17	74.2121	pfam13499	EF-hand_7	-	cl38414
Q#55 - >HORVU.MOREX.r3.1HG0092880.1.V3	superfamily	463900	449	512	2.89633e-17	74.2121	cl38414	EF-hand_7 superfamily	-	-
Q#55 - >HORVU.MOREX.r3.1HG0092880.1.V3	specific	463900	380	441	4.51987e-12	59.5745	pfam13499	EF-hand_7	-	cl38414
Q#55 - >HORVU.MOREX.r3.1HG0092880.1.V3	superfamily	463900	380	441	4.51987e-12	59.5745	cl38414	EF-hand_7 superfamily	-	-
Q#55 - >HORVU.MOREX.r3.1HG0092880.1.V3	non-specific	463900	413	477	1.06569e-08	49.9445	pfam13499	EF-hand_7	-	cl38414
Q#55 - >HORVU.MOREX.r3.1HG0092880.1.V3	superfamily	463900	413	477	1.06569e-08	49.9445	cl38414	EF-hand_7 superfamily	-	-
Q#55 - >HORVU.MOREX.r3.1HG0092880.1.V3	non-specific	404678	463	514	6.06597e-07	44.6133	pfam13833	EF-hand_8	-	cl08302
Q#55 - >HORVU.MOREX.r3.1HG0092880.1.V3	superfamily	415501	463	514	6.06597e-07	44.6133	cl08302	EFh superfamily	-	-
Q#55 - >HORVU.MOREX.r3.1HG0092880.1.V3	non-specific	425435	487	512	1.13936e-06	43.1582	pfam00036	EF-hand_1	-	cl37953
Q#55 - >HORVU.MOREX.r3.1HG0092880.1.V3	superfamily	425435	487	512	1.13936e-06	43.1582	cl37953	EF-hand_1 superfamily	-	-
Q#55 - >HORVU.MOREX.r3.1HG0092880.1.V3	non-specific	463869	380	408	7.72044e-06	40.6228	pfam13405	EF-hand_6	-	cl38409
Q#55 - >HORVU.MOREX.r3.1HG0092880.1.V3	superfamily	463869	380	408	7.72044e-06	40.6228	cl38409	EF-hand_6 superfamily	-	-
Q#55 - >HORVU.MOREX.r3.1HG0092880.1.V3	non-specific	404678	392	438	1.31256e-05	40.7613	pfam13833	EF-hand_8	-	cl08302
Q#55 - >HORVU.MOREX.r3.1HG0092880.1.V3	superfamily	415501	392	438	1.31256e-05	40.7613	cl08302	EFh superfamily	-	-
Q#55 - >HORVU.MOREX.r3.1HG0092880.1.V3	non-specific	463869	452	480	1.41844e-05	40.2376	pfam13405	EF-hand_6	-	cl38409
Q#55 - >HORVU.MOREX.r3.1HG0092880.1.V3	superfamily	463869	452	480	1.41844e-05	40.2376	cl38409	EF-hand_6 superfamily	-	-
Q#55 - >HORVU.MOREX.r3.1HG0092880.1.V3	non-specific	425435	451	478	4.24826e-05	38.5358	pfam00036	EF-hand_1	-	cl37953
Q#55 - >HORVU.MOREX.r3.1HG0092880.1.V3	non-specific	425435	380	407	6.60774e-05	38.1506	pfam00036	EF-hand_1	-	cl37953
Q#55 - >HORVU.MOREX.r3.1HG0092880.1.V3	superfamily	425435	380	407	6.60774e-05	38.1506	cl37953	EF-hand_1 superfamily	-	-
Q#55 - >HORVU.MOREX.r3.1HG0092880.1.V3	non-specific	425435	415	443	0.000546119	35.4542	pfam00036	EF-hand_1	-	cl37953
Q#55 - >HORVU.MOREX.r3.1HG0092880.1.V3	non-specific	433035	487	511	0.00186465	33.8321	pfam13202	EF-hand_5	-	cl23632
Q#55 - >HORVU.MOREX.r3.1HG0092880.1.V3	superfamily	433035	487	511	0.00186465	33.8321	cl23632	EF-hand_5 superfamily	-	-
Q#55 - >HORVU.MOREX.r3.1HG0092880.1.V3	non-specific	433035	380	402	0.00385826	33.0617	pfam13202	EF-hand_5	-	cl23632
Q#55 - >HORVU.MOREX.r3.1HG0092880.1.V3	superfamily	433035	380	402	0.00385826	33.0617	cl23632	EF-hand_5 superfamily	-	-
Q#56 - >HORVU.MOREX.r3.1HG0057490.1.V3	specific	459660	5	260	1.46648e-65	204.4	pfam00069	Pkinase	-	cl47491
Q#56 - >HORVU.MOREX.r3.1HG0057490.1.V3	superfamily	459660	5	260	1.46648e-65	204.4	cl47491	Pkinase superfamily	-	-
Q#56 - >HORVU.MOREX.r3.1HG0057490.1.V3	non-specific	462242	8	255	1.3176e-30	114.901	pfam07714	PK_Tyr_Ser-Thr	-	cl47985
Q#56 - >HORVU.MOREX.r3.1HG0057490.1.V3	superfamily	462242	8	255	1.3176e-30	114.901	cl47985	PK_Tyr_Ser-Thr superfamily	-	-
Q#57 - >HORVU.MOREX.r3.1HG0071290.1.V3	specific	459660	11	264	1.44265e-68	216.341	pfam00069	Pkinase	-	cl47491
Q#57 - >HORVU.MOREX.r3.1HG0071290.1.V3	superfamily	459660	11	264	1.44265e-68	216.341	cl47491	Pkinase superfamily	-	-
Q#57 - >HORVU.MOREX.r3.1HG0071290.1.V3	non-specific	462242	12	261	1.84763e-37	136.087	pfam07714	PK_Tyr_Ser-Thr	-	cl47985
Q#57 - >HORVU.MOREX.r3.1HG0071290.1.V3	superfamily	462242	12	261	1.84763e-37	136.087	cl47985	PK_Tyr_Ser-Thr superfamily	-	-
Q#57 - >HORVU.MOREX.r3.1HG0071290.1.V3	specific	427528	300	355	4.99931e-22	87.1559	pfam03822	NAF	-	cl17070
Q#57 - >HORVU.MOREX.r3.1HG0071290.1.V3	superfamily	473060	300	355	4.99931e-22	87.1559	cl17070	AMPKA_C_like superfamily	-	-
Q#57 - >HORVU.MOREX.r3.1HG0071290.1.V3	non-specific	405254	116	253	3.42389e-06	46.7207	pfam14531	Kinase-like	N	cl26012
Q#57 - >HORVU.MOREX.r3.1HG0071290.1.V3	superfamily	405254	116	253	3.42389e-06	46.7207	cl26012	Kinase-like superfamily	N	-
Q#58 - >HORVU.MOREX.r3.1HG0082030.1.V3	specific	459660	14	266	3.87444e-79	244.461	pfam00069	Pkinase	-	cl47491
Q#58 - >HORVU.MOREX.r3.1HG0082030.1.V3	superfamily	459660	14	266	3.87444e-79	244.461	cl47491	Pkinase superfamily	-	-
Q#58 - >HORVU.MOREX.r3.1HG0082030.1.V3	non-specific	462242	15	263	1.2844e-37	136.858	pfam07714	PK_Tyr_Ser-Thr	-	cl47985
Q#58 - >HORVU.MOREX.r3.1HG0082030.1.V3	superfamily	462242	15	263	1.2844e-37	136.858	cl47985	PK_Tyr_Ser-Thr superfamily	-	-
Q#58 - >HORVU.MOREX.r3.1HG0082030.1.V3	specific	460465	457	499	9.10492e-12	57.8682	pfam02149	KA1	-	cl47725
Q#58 - >HORVU.MOREX.r3.1HG0082030.1.V3	superfamily	460465	457	499	9.10492e-12	57.8682	cl47725	KA1 superfamily	-	-
Q#58 - >HORVU.MOREX.r3.1HG0082030.1.V3	non-specific	405254	120	213	4.51641e-06	46.3355	pfam14531	Kinase-like	N	cl26012
Q#58 - >HORVU.MOREX.r3.1HG0082030.1.V3	superfamily	405254	120	213	4.51641e-06	46.3355	cl26012	Kinase-like superfamily	N	-
Q#58 - >HORVU.MOREX.r3.1HG0082030.1.V3	non-specific	395502	289	324	0.000979747	35.1087	pfam00627	UBA	-	cl21463
Q#58 - >HORVU.MOREX.r3.1HG0082030.1.V3	superfamily	473871	289	324	0.000979747	35.1087	cl21463	UBA_like_SF superfamily	-	-
Q#59 - >HORVU.MOREX.r3.1HG0017930.1.V3	specific	459660	24	280	1.35706e-69	219.038	pfam00069	Pkinase	-	cl47491
Q#59 - >HORVU.MOREX.r3.1HG0017930.1.V3	superfamily	459660	24	280	1.35706e-69	219.038	cl47491	Pkinase superfamily	-	-
Q#59 - >HORVU.MOREX.r3.1HG0017930.1.V3	non-specific	462242	25	274	1.89311e-38	138.398	pfam07714	PK_Tyr_Ser-Thr	-	cl47985
Q#59 - >HORVU.MOREX.r3.1HG0017930.1.V3	superfamily	462242	25	274	1.89311e-38	138.398	cl47985	PK_Tyr_Ser-Thr superfamily	-	-
Q#59 - >HORVU.MOREX.r3.1HG0017930.1.V3	specific	427528	321	376	9.07746e-19	77.9111	pfam03822	NAF	-	cl17070
Q#59 - >HORVU.MOREX.r3.1HG0017930.1.V3	superfamily	473060	321	376	9.07746e-19	77.9111	cl17070	AMPKA_C_like superfamily	-	-
Q#59 - >HORVU.MOREX.r3.1HG0017930.1.V3	non-specific	405254	20	268	9.30222e-09	54.4247	pfam14531	Kinase-like	-	cl26012
Q#59 - >HORVU.MOREX.r3.1HG0017930.1.V3	superfamily	405254	20	268	9.30222e-09	54.4247	cl26012	Kinase-like superfamily	-	-
Q#59 - >HORVU.MOREX.r3.1HG0017930.1.V3	non-specific	432484	94	178	0.00526709	37.0838	pfam12330	Haspin_kinase	NC	cl21453
Q#59 - >HORVU.MOREX.r3.1HG0017930.1.V3	superfamily	473864	94	178	0.00526709	37.0838	cl21453	PKc_like superfamily	NC	-
Q#60 - >HORVU.MOREX.r3.1HG0060110.1.V3	specific	459660	20	283	1.29272e-54	175.895	pfam00069	Pkinase	-	cl47491
Q#60 - >HORVU.MOREX.r3.1HG0060110.1.V3	superfamily	459660	20	283	1.29272e-54	175.895	cl47491	Pkinase superfamily	-	-
Q#60 - >HORVU.MOREX.r3.1HG0060110.1.V3	non-specific	462242	25	280	6.72802e-28	107.197	pfam07714	PK_Tyr_Ser-Thr	-	cl47985
Q#60 - >HORVU.MOREX.r3.1HG0060110.1.V3	superfamily	462242	25	280	6.72802e-28	107.197	cl47985	PK_Tyr_Ser-Thr superfamily	-	-
Q#60 - >HORVU.MOREX.r3.1HG0060110.1.V3	non-specific	405254	107	271	1.18963e-08	53.2691	pfam14531	Kinase-like	N	cl26012
Q#60 - >HORVU.MOREX.r3.1HG0060110.1.V3	superfamily	405254	107	271	1.18963e-08	53.2691	cl26012	Kinase-like superfamily	N	-
Q#61 - >HORVU.MOREX.r3.1HG0077650.1.V3	specific	459660	52	306	1.90101e-69	220.193	pfam00069	Pkinase	-	cl47491
Q#61 - >HORVU.MOREX.r3.1HG0077650.1.V3	superfamily	459660	52	306	1.90101e-69	220.193	cl47491	Pkinase superfamily	-	-
Q#61 - >HORVU.MOREX.r3.1HG0077650.1.V3	non-specific	462242	53	302	1.19002e-33	126.457	pfam07714	PK_Tyr_Ser-Thr	-	cl47985
Q#61 - >HORVU.MOREX.r3.1HG0077650.1.V3	superfamily	462242	53	302	1.19002e-33	126.457	cl47985	PK_Tyr_Ser-Thr superfamily	-	-
Q#61 - >HORVU.MOREX.r3.1HG0077650.1.V3	specific	427528	394	447	2.59666e-21	85.2299	pfam03822	NAF	-	cl17070
Q#61 - >HORVU.MOREX.r3.1HG0077650.1.V3	superfamily	473060	394	447	2.59666e-21	85.2299	cl17070	AMPKA_C_like superfamily	-	-
Q#61 - >HORVU.MOREX.r3.1HG0077650.1.V3	non-specific	405254	48	252	2.51451e-06	47.4911	pfam14531	Kinase-like	-	cl26012
Q#61 - >HORVU.MOREX.r3.1HG0077650.1.V3	superfamily	405254	48	252	2.51451e-06	47.4911	cl26012	Kinase-like superfamily	-	-
Q#61 - >HORVU.MOREX.r3.1HG0077650.1.V3	non-specific	427143	58	211	4.43104e-06	46.0728	pfam03109	ABC1	-	cl21453
Q#61 - >HORVU.MOREX.r3.1HG0077650.1.V3	superfamily	473864	58	211	4.43104e-06	46.0728	cl21453	PKc_like superfamily	-	-
Q#62 - >HORVU.MOREX.r3.1HG0069650.1.V3	specific	459660	62	320	6.6856e-71	223.66	pfam00069	Pkinase	-	cl47491
Q#62 - >HORVU.MOREX.r3.1HG0069650.1.V3	superfamily	459660	62	320	6.6856e-71	223.66	cl47491	Pkinase superfamily	-	-
Q#62 - >HORVU.MOREX.r3.1HG0069650.1.V3	non-specific	462242	65	278	7.41595e-22	92.9448	pfam07714	PK_Tyr_Ser-Thr	-	cl47985
Q#62 - >HORVU.MOREX.r3.1HG0069650.1.V3	superfamily	462242	65	278	7.41595e-22	92.9448	cl47985	PK_Tyr_Ser-Thr superfamily	-	-
Q#62 - >HORVU.MOREX.r3.1HG0069650.1.V3	specific	463900	437	500	4.23976e-17	73.8269	pfam13499	EF-hand_7	-	cl38414
Q#62 - >HORVU.MOREX.r3.1HG0069650.1.V3	superfamily	463900	437	500	4.23976e-17	73.8269	cl38414	EF-hand_7 superfamily	-	-
Q#62 - >HORVU.MOREX.r3.1HG0069650.1.V3	specific	463900	368	429	1.83449e-15	69.2045	pfam13499	EF-hand_7	-	cl38414
Q#62 - >HORVU.MOREX.r3.1HG0069650.1.V3	superfamily	463900	368	429	1.83449e-15	69.2045	cl38414	EF-hand_7 superfamily	-	-
Q#62 - >HORVU.MOREX.r3.1HG0069650.1.V3	non-specific	404678	380	425	6.24327e-08	47.3097	pfam13833	EF-hand_8	-	cl08302
Q#62 - >HORVU.MOREX.r3.1HG0069650.1.V3	superfamily	415501	380	425	6.24327e-08	47.3097	cl08302	EFh superfamily	-	-
Q#62 - >HORVU.MOREX.r3.1HG0069650.1.V3	non-specific	425435	474	501	1.31044e-06	42.773	pfam00036	EF-hand_1	-	cl37953
Q#62 - >HORVU.MOREX.r3.1HG0069650.1.V3	superfamily	425435	474	501	1.31044e-06	42.773	cl37953	EF-hand_1 superfamily	-	-
Q#62 - >HORVU.MOREX.r3.1HG0069650.1.V3	non-specific	463869	440	468	1.86763e-06	42.5488	pfam13405	EF-hand_6	-	cl38409
Q#62 - >HORVU.MOREX.r3.1HG0069650.1.V3	superfamily	463869	440	468	1.86763e-06	42.5488	cl38409	EF-hand_6 superfamily	-	-
Q#62 - >HORVU.MOREX.r3.1HG0069650.1.V3	non-specific	404678	452	501	6.67535e-06	41.5317	pfam13833	EF-hand_8	-	cl08302
Q#62 - >HORVU.MOREX.r3.1HG0069650.1.V3	superfamily	415501	452	501	6.67535e-06	41.5317	cl08302	EFh superfamily	-	-
Q#62 - >HORVU.MOREX.r3.1HG0069650.1.V3	non-specific	425435	368	394	2.3641e-05	39.3062	pfam00036	EF-hand_1	-	cl37953
Q#62 - >HORVU.MOREX.r3.1HG0069650.1.V3	superfamily	425435	368	394	2.3641e-05	39.3062	cl37953	EF-hand_1 superfamily	-	-
Q#62 - >HORVU.MOREX.r3.1HG0069650.1.V3	non-specific	463869	368	396	3.02807e-05	39.082	pfam13405	EF-hand_6	-	cl38409
Q#62 - >HORVU.MOREX.r3.1HG0069650.1.V3	superfamily	463869	368	396	3.02807e-05	39.082	cl38409	EF-hand_6 superfamily	-	-
Q#62 - >HORVU.MOREX.r3.1HG0069650.1.V3	non-specific	425435	443	466	5.33866e-05	38.5358	pfam00036	EF-hand_1	-	cl37953
Q#62 - >HORVU.MOREX.r3.1HG0069650.1.V3	non-specific	425435	403	431	6.56089e-05	38.1506	pfam00036	EF-hand_1	-	cl37953
Q#62 - >HORVU.MOREX.r3.1HG0069650.1.V3	non-specific	433035	368	390	0.00121366	34.6025	pfam13202	EF-hand_5	-	cl23632
Q#62 - >HORVU.MOREX.r3.1HG0069650.1.V3	superfamily	433035	368	390	0.00121366	34.6025	cl23632	EF-hand_5 superfamily	-	-
Q#62 - >HORVU.MOREX.r3.1HG0069650.1.V3	non-specific	433035	475	499	0.00210379	33.8321	pfam13202	EF-hand_5	-	cl23632
Q#62 - >HORVU.MOREX.r3.1HG0069650.1.V3	superfamily	433035	475	499	0.00210379	33.8321	cl23632	EF-hand_5 superfamily	-	-
Q#62 - >HORVU.MOREX.r3.1HG0069650.1.V3	non-specific	433035	440	462	0.00354145	33.0617	pfam13202	EF-hand_5	-	cl23632
Q#63 - >HORVU.MOREX.r3.1HG0072410.1.V3	specific	459660	73	331	3.15551e-73	230.594	pfam00069	Pkinase	-	cl47491
Q#63 - >HORVU.MOREX.r3.1HG0072410.1.V3	superfamily	459660	73	331	3.15551e-73	230.594	cl47491	Pkinase superfamily	-	-
Q#63 - >HORVU.MOREX.r3.1HG0072410.1.V3	non-specific	462242	75	328	2.4988e-20	88.7076	pfam07714	PK_Tyr_Ser-Thr	-	cl47985
Q#63 - >HORVU.MOREX.r3.1HG0072410.1.V3	superfamily	462242	75	328	2.4988e-20	88.7076	cl47985	PK_Tyr_Ser-Thr superfamily	-	-
Q#63 - >HORVU.MOREX.r3.1HG0072410.1.V3	specific	463900	448	512	2.87627e-16	71.5157	pfam13499	EF-hand_7	-	cl38414
Q#63 - >HORVU.MOREX.r3.1HG0072410.1.V3	superfamily	463900	448	512	2.87627e-16	71.5157	cl38414	EF-hand_7 superfamily	-	-
Q#63 - >HORVU.MOREX.r3.1HG0072410.1.V3	specific	463900	377	438	1.03893e-09	53.0261	pfam13499	EF-hand_7	-	cl38414
Q#63 - >HORVU.MOREX.r3.1HG0072410.1.V3	superfamily	463900	377	438	1.03893e-09	53.0261	cl38414	EF-hand_7 superfamily	-	-
Q#63 - >HORVU.MOREX.r3.1HG0072410.1.V3	non-specific	404678	462	512	8.03895e-09	50.0061	pfam13833	EF-hand_8	-	cl08302
Q#63 - >HORVU.MOREX.r3.1HG0072410.1.V3	superfamily	415501	462	512	8.03895e-09	50.0061	cl08302	EFh superfamily	-	-
Q#63 - >HORVU.MOREX.r3.1HG0072410.1.V3	non-specific	425435	487	513	3.61819e-07	44.699	pfam00036	EF-hand_1	-	cl37953
Q#63 - >HORVU.MOREX.r3.1HG0072410.1.V3	superfamily	425435	487	513	3.61819e-07	44.699	cl37953	EF-hand_1 superfamily	-	-
Q#63 - >HORVU.MOREX.r3.1HG0072410.1.V3	non-specific	404678	391	442	2.94909e-06	42.6873	pfam13833	EF-hand_8	-	cl08302
Q#63 - >HORVU.MOREX.r3.1HG0072410.1.V3	superfamily	415501	391	442	2.94909e-06	42.6873	cl08302	EFh superfamily	-	-
Q#63 - >HORVU.MOREX.r3.1HG0072410.1.V3	non-specific	425435	378	406	4.27507e-06	41.6174	pfam00036	EF-hand_1	-	cl37953
Q#63 - >HORVU.MOREX.r3.1HG0072410.1.V3	superfamily	425435	378	406	4.27507e-06	41.6174	cl37953	EF-hand_1 superfamily	-	-
Q#63 - >HORVU.MOREX.r3.1HG0072410.1.V3	non-specific	463869	451	479	1.34945e-05	40.2376	pfam13405	EF-hand_6	-	cl38409
Q#63 - >HORVU.MOREX.r3.1HG0072410.1.V3	superfamily	463869	451	479	1.34945e-05	40.2376	cl38409	EF-hand_6 superfamily	-	-
Q#63 - >HORVU.MOREX.r3.1HG0072410.1.V3	non-specific	433035	487	511	2.65957e-05	39.2249	pfam13202	EF-hand_5	-	cl23632
Q#63 - >HORVU.MOREX.r3.1HG0072410.1.V3	superfamily	433035	487	511	2.65957e-05	39.2249	cl23632	EF-hand_5 superfamily	-	-
Q#63 - >HORVU.MOREX.r3.1HG0072410.1.V3	non-specific	405254	156	319	4.73213e-05	43.2539	pfam14531	Kinase-like	N	cl26012
Q#63 - >HORVU.MOREX.r3.1HG0072410.1.V3	superfamily	405254	156	319	4.73213e-05	43.2539	cl26012	Kinase-like superfamily	N	-
Q#63 - >HORVU.MOREX.r3.1HG0072410.1.V3	non-specific	463869	378	407	7.74493e-05	37.9264	pfam13405	EF-hand_6	-	cl38409
Q#63 - >HORVU.MOREX.r3.1HG0072410.1.V3	superfamily	463869	378	407	7.74493e-05	37.9264	cl38409	EF-hand_6 superfamily	-	-
Q#63 - >HORVU.MOREX.r3.1HG0072410.1.V3	non-specific	425435	450	477	7.95611e-05	37.7654	pfam00036	EF-hand_1	-	cl37953
Q#63 - >HORVU.MOREX.r3.1HG0072410.1.V3	non-specific	404678	359	401	0.000140632	38.0649	pfam13833	EF-hand_8	-	cl08302
Q#63 - >HORVU.MOREX.r3.1HG0072410.1.V3	non-specific	433035	451	473	0.000651287	35.3729	pfam13202	EF-hand_5	-	cl23632
Q#63 - >HORVU.MOREX.r3.1HG0072410.1.V3	non-specific	433035	379	400	0.00150073	34.2173	pfam13202	EF-hand_5	-	cl23632
Q#63 - >HORVU.MOREX.r3.1HG0072410.1.V3	superfamily	433035	379	400	0.00150073	34.2173	cl23632	EF-hand_5 superfamily	-	-
Q#63 - >HORVU.MOREX.r3.1HG0072410.1.V3	non-specific	463869	487	512	0.00227938	33.6892	pfam13405	EF-hand_6	-	cl38409
Q#64 - >HORVU.MOREX.r3.1HG0075630.1.V3	specific	459660	26	282	1.25386e-62	198.237	pfam00069	Pkinase	-	cl47491
Q#64 - >HORVU.MOREX.r3.1HG0075630.1.V3	superfamily	459660	26	282	1.25386e-62	198.237	cl47491	Pkinase superfamily	-	-
Q#64 - >HORVU.MOREX.r3.1HG0075630.1.V3	non-specific	462242	30	279	3.61393e-28	109.123	pfam07714	PK_Tyr_Ser-Thr	-	cl47985
Q#64 - >HORVU.MOREX.r3.1HG0075630.1.V3	superfamily	462242	30	279	3.61393e-28	109.123	cl47985	PK_Tyr_Ser-Thr superfamily	-	-
Q#65 - >HORVU.MOREX.r3.1HG0017980.1.V3	specific	459660	24	280	2.61169e-69	218.267	pfam00069	Pkinase	-	cl47491
Q#65 - >HORVU.MOREX.r3.1HG0017980.1.V3	superfamily	459660	24	280	2.61169e-69	218.267	cl47491	Pkinase superfamily	-	-
Q#65 - >HORVU.MOREX.r3.1HG0017980.1.V3	non-specific	462242	25	274	1.14109e-39	141.865	pfam07714	PK_Tyr_Ser-Thr	-	cl47985
Q#65 - >HORVU.MOREX.r3.1HG0017980.1.V3	superfamily	462242	25	274	1.14109e-39	141.865	cl47985	PK_Tyr_Ser-Thr superfamily	-	-
Q#65 - >HORVU.MOREX.r3.1HG0017980.1.V3	specific	427528	321	376	5.65679e-20	81.3779	pfam03822	NAF	-	cl17070
Q#65 - >HORVU.MOREX.r3.1HG0017980.1.V3	superfamily	473060	321	376	5.65679e-20	81.3779	cl17070	AMPKA_C_like superfamily	-	-
Q#65 - >HORVU.MOREX.r3.1HG0017980.1.V3	non-specific	405254	26	268	2.85358e-09	55.9655	pfam14531	Kinase-like	-	cl26012
Q#65 - >HORVU.MOREX.r3.1HG0017980.1.V3	superfamily	405254	26	268	2.85358e-09	55.9655	cl26012	Kinase-like superfamily	-	-
Q#65 - >HORVU.MOREX.r3.1HG0017980.1.V3	non-specific	432484	94	178	0.000963928	39.395	pfam12330	Haspin_kinase	NC	cl21453
Q#65 - >HORVU.MOREX.r3.1HG0017980.1.V3	superfamily	473864	94	178	0.000963928	39.395	cl21453	PKc_like superfamily	NC	-
Q#66 - >HORVU.MOREX.r3.1HG0049840.1.V3	specific	459660	179	441	1.23049e-65	212.874	pfam00069	Pkinase	-	cl47491
Q#66 - >HORVU.MOREX.r3.1HG0049840.1.V3	superfamily	459660	179	441	1.23049e-65	212.874	cl47491	Pkinase superfamily	-	-
Q#66 - >HORVU.MOREX.r3.1HG0049840.1.V3	non-specific	462242	180	384	4.37058e-32	122.99	pfam07714	PK_Tyr_Ser-Thr	C	cl47985
Q#66 - >HORVU.MOREX.r3.1HG0049840.1.V3	superfamily	462242	180	384	4.37058e-32	122.99	cl47985	PK_Tyr_Ser-Thr superfamily	C	-
Q#66 - >HORVU.MOREX.r3.1HG0049840.1.V3	non-specific	427143	257	342	0.000204362	41.4504	pfam03109	ABC1	N	cl21453
Q#66 - >HORVU.MOREX.r3.1HG0049840.1.V3	superfamily	473864	257	342	0.000204362	41.4504	cl21453	PKc_like superfamily	N	-
Q#66 - >HORVU.MOREX.r3.1HG0049840.1.V3	non-specific	428872	258	341	0.000427513	40.0658	pfam06293	Kdo	N	cl21453
Q#66 - >HORVU.MOREX.r3.1HG0049840.1.V3	non-specific	405254	266	429	0.00328789	37.8611	pfam14531	Kinase-like	N	cl26012
Q#66 - >HORVU.MOREX.r3.1HG0049840.1.V3	superfamily	405254	266	429	0.00328789	37.8611	cl26012	Kinase-like superfamily	N	-
Q#67 - >HORVU.MOREX.r3.3HG0242960.1.V3	specific	459660	26	280	3.64552e-66	211.334	pfam00069	Pkinase	-	cl47491
Q#67 - >HORVU.MOREX.r3.3HG0242960.1.V3	superfamily	459660	26	280	3.64552e-66	211.334	cl47491	Pkinase superfamily	-	-
Q#67 - >HORVU.MOREX.r3.3HG0242960.1.V3	non-specific	462242	26	274	4.09287e-33	124.916	pfam07714	PK_Tyr_Ser-Thr	-	cl47985
Q#67 - >HORVU.MOREX.r3.3HG0242960.1.V3	superfamily	462242	26	274	4.09287e-33	124.916	cl47985	PK_Tyr_Ser-Thr superfamily	-	-
Q#67 - >HORVU.MOREX.r3.3HG0242960.1.V3	specific	427528	365	415	1.9834e-13	62.8884	pfam03822	NAF	C	cl17070
Q#67 - >HORVU.MOREX.r3.3HG0242960.1.V3	superfamily	473060	365	415	1.9834e-13	62.8884	cl17070	AMPKA_C_like superfamily	C	-
Q#67 - >HORVU.MOREX.r3.3HG0242960.1.V3	non-specific	405254	22	226	2.33523e-06	47.4911	pfam14531	Kinase-like	-	cl26012
Q#67 - >HORVU.MOREX.r3.3HG0242960.1.V3	superfamily	405254	22	226	2.33523e-06	47.4911	cl26012	Kinase-like superfamily	-	-
Q#68 - >HORVU.MOREX.r3.3HG0320810.1.V3	specific	459660	17	272	3.43518e-74	232.134	pfam00069	Pkinase	-	cl47491
Q#68 - >HORVU.MOREX.r3.3HG0320810.1.V3	superfamily	459660	17	272	3.43518e-74	232.134	cl47491	Pkinase superfamily	-	-
Q#68 - >HORVU.MOREX.r3.3HG0320810.1.V3	non-specific	462242	19	267	1.39633e-38	139.554	pfam07714	PK_Tyr_Ser-Thr	-	cl47985
Q#68 - >HORVU.MOREX.r3.3HG0320810.1.V3	superfamily	462242	19	267	1.39633e-38	139.554	cl47985	PK_Tyr_Ser-Thr superfamily	-	-
Q#68 - >HORVU.MOREX.r3.3HG0320810.1.V3	specific	460465	470	512	2.44163e-09	50.9346	pfam02149	KA1	-	cl47725
Q#68 - >HORVU.MOREX.r3.3HG0320810.1.V3	superfamily	460465	470	512	2.44163e-09	50.9346	cl47725	KA1 superfamily	-	-
Q#68 - >HORVU.MOREX.r3.3HG0320810.1.V3	non-specific	406881	392	488	8.99112e-08	48.891	pfam16579	AdenylateSensor	C	cl17070
Q#68 - >HORVU.MOREX.r3.3HG0320810.1.V3	superfamily	473060	392	488	8.99112e-08	48.891	cl17070	AMPKA_C_like superfamily	C	-
Q#68 - >HORVU.MOREX.r3.3HG0320810.1.V3	non-specific	405254	103	221	1.11454e-06	48.2615	pfam14531	Kinase-like	N	cl26012
Q#68 - >HORVU.MOREX.r3.3HG0320810.1.V3	superfamily	405254	103	221	1.11454e-06	48.2615	cl26012	Kinase-like superfamily	N	-
Q#68 - >HORVU.MOREX.r3.3HG0320810.1.V3	specific	395502	294	330	4.2456e-06	41.6571	pfam00627	UBA	-	cl21463
Q#68 - >HORVU.MOREX.r3.3HG0320810.1.V3	superfamily	473871	294	330	4.2456e-06	41.6571	cl21463	UBA_like_SF superfamily	-	-
Q#68 - >HORVU.MOREX.r3.3HG0320810.1.V3	non-specific	427143	60	165	0.00817223	36.0576	pfam03109	ABC1	N	cl21453
Q#68 - >HORVU.MOREX.r3.3HG0320810.1.V3	superfamily	473864	60	165	0.00817223	36.0576	cl21453	PKc_like superfamily	N	-
Q#69 - >HORVU.MOREX.r3.3HG0299220.1.V3	specific	459660	4	260	1.6397e-63	199.778	pfam00069	Pkinase	-	cl47491
Q#69 - >HORVU.MOREX.r3.3HG0299220.1.V3	superfamily	459660	4	260	1.6397e-63	199.778	cl47491	Pkinase superfamily	-	-
Q#69 - >HORVU.MOREX.r3.3HG0299220.1.V3	non-specific	462242	8	257	2.06042e-30	114.901	pfam07714	PK_Tyr_Ser-Thr	-	cl47985
Q#69 - >HORVU.MOREX.r3.3HG0299220.1.V3	superfamily	462242	8	257	2.06042e-30	114.901	cl47985	PK_Tyr_Ser-Thr superfamily	-	-
Q#70 - >HORVU.MOREX.r3.3HG0290170.1.V3	specific	459660	16	275	1.27931e-66	211.334	pfam00069	Pkinase	-	cl47491
Q#70 - >HORVU.MOREX.r3.3HG0290170.1.V3	superfamily	459660	16	275	1.27931e-66	211.334	cl47491	Pkinase superfamily	-	-
Q#70 - >HORVU.MOREX.r3.3HG0290170.1.V3	non-specific	462242	17	279	9.341e-31	117.983	pfam07714	PK_Tyr_Ser-Thr	-	cl47985
Q#70 - >HORVU.MOREX.r3.3HG0290170.1.V3	superfamily	462242	17	279	9.341e-31	117.983	cl47985	PK_Tyr_Ser-Thr superfamily	-	-
Q#70 - >HORVU.MOREX.r3.3HG0290170.1.V3	specific	427528	334	389	1.25364e-17	74.8295	pfam03822	NAF	-	cl17070
Q#70 - >HORVU.MOREX.r3.3HG0290170.1.V3	superfamily	473060	334	389	1.25364e-17	74.8295	cl17070	AMPKA_C_like superfamily	-	-
Q#70 - >HORVU.MOREX.r3.3HG0290170.1.V3	non-specific	405254	15	263	7.99637e-09	54.8099	pfam14531	Kinase-like	-	cl26012
Q#70 - >HORVU.MOREX.r3.3HG0290170.1.V3	superfamily	405254	15	263	7.99637e-09	54.8099	cl26012	Kinase-like superfamily	-	-
Q#70 - >HORVU.MOREX.r3.3HG0290170.1.V3	non-specific	428872	47	151	0.00117248	38.1398	pfam06293	Kdo	NC	cl21453
Q#70 - >HORVU.MOREX.r3.3HG0290170.1.V3	superfamily	473864	47	151	0.00117248	38.1398	cl21453	PKc_like superfamily	NC	-
Q#71 - >HORVU.MOREX.r3.3HG0303750.1.V3	specific	459660	73	331	1.6075e-75	236.372	pfam00069	Pkinase	-	cl47491
Q#71 - >HORVU.MOREX.r3.3HG0303750.1.V3	superfamily	459660	73	331	1.6075e-75	236.372	cl47491	Pkinase superfamily	-	-
Q#71 - >HORVU.MOREX.r3.3HG0303750.1.V3	non-specific	462242	75	328	5.00404e-22	93.7152	pfam07714	PK_Tyr_Ser-Thr	-	cl47985
Q#71 - >HORVU.MOREX.r3.3HG0303750.1.V3	superfamily	462242	75	328	5.00404e-22	93.7152	cl47985	PK_Tyr_Ser-Thr superfamily	-	-
Q#71 - >HORVU.MOREX.r3.3HG0303750.1.V3	specific	463900	448	512	2.21027e-16	71.9009	pfam13499	EF-hand_7	-	cl38414
Q#71 - >HORVU.MOREX.r3.3HG0303750.1.V3	superfamily	463900	448	512	2.21027e-16	71.9009	cl38414	EF-hand_7 superfamily	-	-
Q#71 - >HORVU.MOREX.r3.3HG0303750.1.V3	specific	463900	377	438	9.93372e-11	55.7225	pfam13499	EF-hand_7	-	cl38414
Q#71 - >HORVU.MOREX.r3.3HG0303750.1.V3	superfamily	463900	377	438	9.93372e-11	55.7225	cl38414	EF-hand_7 superfamily	-	-
Q#71 - >HORVU.MOREX.r3.3HG0303750.1.V3	non-specific	404678	462	512	1.00707e-08	49.6209	pfam13833	EF-hand_8	-	cl08302
Q#71 - >HORVU.MOREX.r3.3HG0303750.1.V3	superfamily	415501	462	512	1.00707e-08	49.6209	cl08302	EFh superfamily	-	-
Q#71 - >HORVU.MOREX.r3.3HG0303750.1.V3	non-specific	404678	391	442	9.34818e-07	44.2281	pfam13833	EF-hand_8	-	cl08302
Q#71 - >HORVU.MOREX.r3.3HG0303750.1.V3	superfamily	415501	391	442	9.34818e-07	44.2281	cl08302	EFh superfamily	-	-
Q#71 - >HORVU.MOREX.r3.3HG0303750.1.V3	non-specific	425435	487	513	2.44494e-06	42.3878	pfam00036	EF-hand_1	-	cl37953
Q#71 - >HORVU.MOREX.r3.3HG0303750.1.V3	superfamily	425435	487	513	2.44494e-06	42.3878	cl37953	EF-hand_1 superfamily	-	-
Q#71 - >HORVU.MOREX.r3.3HG0303750.1.V3	non-specific	463869	451	479	3.09871e-06	41.7784	pfam13405	EF-hand_6	-	cl38409
Q#71 - >HORVU.MOREX.r3.3HG0303750.1.V3	superfamily	463869	451	479	3.09871e-06	41.7784	cl38409	EF-hand_6 superfamily	-	-
Q#71 - >HORVU.MOREX.r3.3HG0303750.1.V3	non-specific	425435	450	477	3.69972e-05	38.921	pfam00036	EF-hand_1	-	cl37953
Q#71 - >HORVU.MOREX.r3.3HG0303750.1.V3	non-specific	425435	378	406	4.41464e-05	38.5358	pfam00036	EF-hand_1	-	cl37953
Q#71 - >HORVU.MOREX.r3.3HG0303750.1.V3	superfamily	425435	378	406	4.41464e-05	38.5358	cl37953	EF-hand_1 superfamily	-	-
Q#71 - >HORVU.MOREX.r3.3HG0303750.1.V3	non-specific	405254	156	319	9.31123e-05	42.4835	pfam14531	Kinase-like	N	cl26012
Q#71 - >HORVU.MOREX.r3.3HG0303750.1.V3	superfamily	405254	156	319	9.31123e-05	42.4835	cl26012	Kinase-like superfamily	N	-
Q#71 - >HORVU.MOREX.r3.3HG0303750.1.V3	non-specific	404678	359	401	0.000124961	38.0649	pfam13833	EF-hand_8	-	cl08302
Q#71 - >HORVU.MOREX.r3.3HG0303750.1.V3	non-specific	433035	487	511	0.000221238	36.5285	pfam13202	EF-hand_5	-	cl23632
Q#71 - >HORVU.MOREX.r3.3HG0303750.1.V3	superfamily	433035	487	511	0.000221238	36.5285	cl23632	EF-hand_5 superfamily	-	-
Q#71 - >HORVU.MOREX.r3.3HG0303750.1.V3	non-specific	463869	378	407	0.000254271	36.3856	pfam13405	EF-hand_6	-	cl38409
Q#71 - >HORVU.MOREX.r3.3HG0303750.1.V3	superfamily	463869	378	407	0.000254271	36.3856	cl38409	EF-hand_6 superfamily	-	-
Q#71 - >HORVU.MOREX.r3.3HG0303750.1.V3	non-specific	427143	149	230	0.00381883	37.2132	pfam03109	ABC1	N	cl21453
Q#71 - >HORVU.MOREX.r3.3HG0303750.1.V3	superfamily	473864	149	230	0.00381883	37.2132	cl21453	PKc_like superfamily	N	-
Q#71 - >HORVU.MOREX.r3.3HG0303750.1.V3	non-specific	433035	379	400	0.00774625	32.2913	pfam13202	EF-hand_5	-	cl23632
Q#71 - >HORVU.MOREX.r3.3HG0303750.1.V3	superfamily	433035	379	400	0.00774625	32.2913	cl23632	EF-hand_5 superfamily	-	-
Q#71 - >HORVU.MOREX.r3.3HG0303750.1.V3	non-specific	463869	489	512	0.00819981	32.1484	pfam13405	EF-hand_6	-	cl38409
Q#72 - >HORVU.MOREX.r3.3HG0286490.1.V3	specific	459660	14	266	4.09208e-80	247.157	pfam00069	Pkinase	-	cl47491
Q#72 - >HORVU.MOREX.r3.3HG0286490.1.V3	superfamily	459660	14	266	4.09208e-80	247.157	cl47491	Pkinase superfamily	-	-
Q#72 - >HORVU.MOREX.r3.3HG0286490.1.V3	non-specific	462242	15	263	4.11972e-38	138.398	pfam07714	PK_Tyr_Ser-Thr	-	cl47985
Q#72 - >HORVU.MOREX.r3.3HG0286490.1.V3	superfamily	462242	15	263	4.11972e-38	138.398	cl47985	PK_Tyr_Ser-Thr superfamily	-	-
Q#72 - >HORVU.MOREX.r3.3HG0286490.1.V3	specific	460465	460	501	5.89369e-10	52.8606	pfam02149	KA1	-	cl47725
Q#72 - >HORVU.MOREX.r3.3HG0286490.1.V3	superfamily	460465	460	501	5.89369e-10	52.8606	cl47725	KA1 superfamily	-	-
Q#72 - >HORVU.MOREX.r3.3HG0286490.1.V3	non-specific	406881	385	477	1.9335e-08	50.817	pfam16579	AdenylateSensor	C	cl17070
Q#72 - >HORVU.MOREX.r3.3HG0286490.1.V3	superfamily	473060	385	477	1.9335e-08	50.817	cl17070	AMPKA_C_like superfamily	C	-
Q#72 - >HORVU.MOREX.r3.3HG0286490.1.V3	non-specific	405254	120	213	6.7972e-06	45.9503	pfam14531	Kinase-like	N	cl26012
Q#72 - >HORVU.MOREX.r3.3HG0286490.1.V3	superfamily	405254	120	213	6.7972e-06	45.9503	cl26012	Kinase-like superfamily	N	-
Q#72 - >HORVU.MOREX.r3.3HG0286490.1.V3	non-specific	395502	288	324	0.00164194	34.3383	pfam00627	UBA	-	cl21463
Q#72 - >HORVU.MOREX.r3.3HG0286490.1.V3	superfamily	473871	288	324	0.00164194	34.3383	cl21463	UBA_like_SF superfamily	-	-
Q#73 - >HORVU.MOREX.r3.3HG0246590.1.V3	specific	459660	12	266	1.59522e-69	218.652	pfam00069	Pkinase	-	cl47491
Q#73 - >HORVU.MOREX.r3.3HG0246590.1.V3	superfamily	459660	12	266	1.59522e-69	218.652	cl47491	Pkinase superfamily	-	-
Q#73 - >HORVU.MOREX.r3.3HG0246590.1.V3	non-specific	462242	13	263	2.28433e-36	133.006	pfam07714	PK_Tyr_Ser-Thr	-	cl47985
Q#73 - >HORVU.MOREX.r3.3HG0246590.1.V3	superfamily	462242	13	263	2.28433e-36	133.006	cl47985	PK_Tyr_Ser-Thr superfamily	-	-
Q#73 - >HORVU.MOREX.r3.3HG0246590.1.V3	specific	427528	315	371	1.33862e-22	88.6967	pfam03822	NAF	-	cl17070
Q#73 - >HORVU.MOREX.r3.3HG0246590.1.V3	superfamily	473060	315	371	1.33862e-22	88.6967	cl17070	AMPKA_C_like superfamily	-	-
Q#73 - >HORVU.MOREX.r3.3HG0246590.1.V3	non-specific	405254	14	212	1.68545e-05	44.4095	pfam14531	Kinase-like	-	cl26012
Q#73 - >HORVU.MOREX.r3.3HG0246590.1.V3	superfamily	405254	14	212	1.68545e-05	44.4095	cl26012	Kinase-like superfamily	-	-
Q#74 - >HORVU.MOREX.r3.3HG0320830.1.V3	non-specific	459660	17	140	6.28554e-37	123.893	pfam00069	Pkinase	C	cl47491
Q#74 - >HORVU.MOREX.r3.3HG0320830.1.V3	superfamily	459660	17	140	6.28554e-37	123.893	cl47491	Pkinase superfamily	C	-
Q#74 - >HORVU.MOREX.r3.3HG0320830.1.V3	non-specific	462242	19	144	1.03973e-21	85.626	pfam07714	PK_Tyr_Ser-Thr	C	cl47985
Q#74 - >HORVU.MOREX.r3.3HG0320830.1.V3	superfamily	462242	19	144	1.03973e-21	85.626	cl47985	PK_Tyr_Ser-Thr superfamily	C	-
Q#75 - >HORVU.MOREX.r3.3HG0297850.1.V3	specific	459660	12	266	5.38116e-66	210.948	pfam00069	Pkinase	-	cl47491
Q#75 - >HORVU.MOREX.r3.3HG0297850.1.V3	superfamily	459660	12	266	5.38116e-66	210.948	cl47491	Pkinase superfamily	-	-
Q#75 - >HORVU.MOREX.r3.3HG0297850.1.V3	non-specific	462242	13	261	2.07454e-36	133.776	pfam07714	PK_Tyr_Ser-Thr	-	cl47985
Q#75 - >HORVU.MOREX.r3.3HG0297850.1.V3	superfamily	462242	13	261	2.07454e-36	133.776	cl47985	PK_Tyr_Ser-Thr superfamily	-	-
Q#75 - >HORVU.MOREX.r3.3HG0297850.1.V3	specific	427528	312	359	1.59695e-17	74.4443	pfam03822	NAF	-	cl17070
Q#75 - >HORVU.MOREX.r3.3HG0297850.1.V3	superfamily	473060	312	359	1.59695e-17	74.4443	cl17070	AMPKA_C_like superfamily	-	-
Q#75 - >HORVU.MOREX.r3.3HG0297850.1.V3	non-specific	405254	15	213	1.69541e-05	44.7947	pfam14531	Kinase-like	-	cl26012
Q#75 - >HORVU.MOREX.r3.3HG0297850.1.V3	superfamily	405254	15	213	1.69541e-05	44.7947	cl26012	Kinase-like superfamily	-	-
Q#75 - >HORVU.MOREX.r3.3HG0297850.1.V3	non-specific	432484	5	161	0.00614039	37.0838	pfam12330	Haspin_kinase	NC	cl21453
Q#75 - >HORVU.MOREX.r3.3HG0297850.1.V3	superfamily	473864	5	161	0.00614039	37.0838	cl21453	PKc_like superfamily	NC	-
Q#76 - >HORVU.MOREX.r3.3HG0264740.1.V3	specific	459660	16	269	1.79369e-63	202.474	pfam00069	Pkinase	-	cl47491
Q#76 - >HORVU.MOREX.r3.3HG0264740.1.V3	superfamily	459660	16	269	1.79369e-63	202.474	cl47491	Pkinase superfamily	-	-
Q#76 - >HORVU.MOREX.r3.3HG0264740.1.V3	non-specific	462242	19	229	5.23862e-35	128.768	pfam07714	PK_Tyr_Ser-Thr	-	cl47985
Q#76 - >HORVU.MOREX.r3.3HG0264740.1.V3	superfamily	462242	19	229	5.23862e-35	128.768	cl47985	PK_Tyr_Ser-Thr superfamily	-	-
Q#76 - >HORVU.MOREX.r3.3HG0264740.1.V3	specific	427528	312	369	1.30527e-17	74.4443	pfam03822	NAF	-	cl17070
Q#76 - >HORVU.MOREX.r3.3HG0264740.1.V3	superfamily	473060	312	369	1.30527e-17	74.4443	cl17070	AMPKA_C_like superfamily	-	-
Q#76 - >HORVU.MOREX.r3.3HG0264740.1.V3	non-specific	405254	19	257	1.51498e-09	56.7359	pfam14531	Kinase-like	-	cl26012
Q#76 - >HORVU.MOREX.r3.3HG0264740.1.V3	superfamily	405254	19	257	1.51498e-09	56.7359	cl26012	Kinase-like superfamily	-	-
Q#77 - >HORVU.MOREX.r3.3HG0290180.1.V3	specific	459660	49	303	6.56312e-64	205.556	pfam00069	Pkinase	-	cl47491
Q#77 - >HORVU.MOREX.r3.3HG0290180.1.V3	superfamily	459660	49	303	6.56312e-64	205.556	cl47491	Pkinase superfamily	-	-
Q#77 - >HORVU.MOREX.r3.3HG0290180.1.V3	non-specific	462242	50	299	2.76966e-30	116.827	pfam07714	PK_Tyr_Ser-Thr	-	cl47985
Q#77 - >HORVU.MOREX.r3.3HG0290180.1.V3	superfamily	462242	50	299	2.76966e-30	116.827	cl47985	PK_Tyr_Ser-Thr superfamily	-	-
Q#77 - >HORVU.MOREX.r3.3HG0290180.1.V3	specific	427528	389	442	5.22259e-21	84.4595	pfam03822	NAF	-	cl17070
Q#77 - >HORVU.MOREX.r3.3HG0290180.1.V3	superfamily	473060	389	442	5.22259e-21	84.4595	cl17070	AMPKA_C_like superfamily	-	-
Q#77 - >HORVU.MOREX.r3.3HG0290180.1.V3	non-specific	405254	51	249	7.87582e-08	52.1135	pfam14531	Kinase-like	-	cl26012
Q#77 - >HORVU.MOREX.r3.3HG0290180.1.V3	superfamily	405254	51	249	7.87582e-08	52.1135	cl26012	Kinase-like superfamily	-	-
Q#77 - >HORVU.MOREX.r3.3HG0290180.1.V3	non-specific	426359	145	200	0.00210612	37.8658	pfam01636	APH	N	cl37506
Q#77 - >HORVU.MOREX.r3.3HG0290180.1.V3	superfamily	426359	145	200	0.00210612	37.8658	cl37506	APH superfamily	N	-
Q#78 - >HORVU.MOREX.r3.3HG0320820.1.V3	non-specific	459660	1	105	2.3624e-34	123.893	pfam00069	Pkinase	N	cl47491
Q#78 - >HORVU.MOREX.r3.3HG0320820.1.V3	superfamily	459660	1	105	2.3624e-34	123.893	cl47491	Pkinase superfamily	N	-
Q#78 - >HORVU.MOREX.r3.3HG0320820.1.V3	specific	460465	303	345	8.04673e-10	51.705	pfam02149	KA1	-	cl47725
Q#78 - >HORVU.MOREX.r3.3HG0320820.1.V3	superfamily	460465	303	345	8.04673e-10	51.705	cl47725	KA1 superfamily	-	-
Q#78 - >HORVU.MOREX.r3.3HG0320820.1.V3	specific	395502	127	163	2.02848e-05	39.3459	pfam00627	UBA	-	cl21463
Q#78 - >HORVU.MOREX.r3.3HG0320820.1.V3	superfamily	473871	127	163	2.02848e-05	39.3459	cl21463	UBA_like_SF superfamily	-	-
Q#79 - >HORVU.MOREX.r3.3HG0320770.1.V3	specific	459660	17	272	4.38224e-74	227.897	pfam00069	Pkinase	-	cl47491
Q#79 - >HORVU.MOREX.r3.3HG0320770.1.V3	superfamily	459660	17	272	4.38224e-74	227.897	cl47491	Pkinase superfamily	-	-
Q#79 - >HORVU.MOREX.r3.3HG0320770.1.V3	non-specific	462242	19	267	8.02419e-38	135.317	pfam07714	PK_Tyr_Ser-Thr	-	cl47985
Q#79 - >HORVU.MOREX.r3.3HG0320770.1.V3	superfamily	462242	19	267	8.02419e-38	135.317	cl47985	PK_Tyr_Ser-Thr superfamily	-	-
Q#79 - >HORVU.MOREX.r3.3HG0320770.1.V3	specific	395502	294	330	2.94839e-06	41.6571	pfam00627	UBA	-	cl21463
Q#79 - >HORVU.MOREX.r3.3HG0320770.1.V3	superfamily	473871	294	330	2.94839e-06	41.6571	cl21463	UBA_like_SF superfamily	-	-
Q#79 - >HORVU.MOREX.r3.3HG0320770.1.V3	non-specific	405254	103	221	1.19564e-05	44.7947	pfam14531	Kinase-like	N	cl26012
Q#79 - >HORVU.MOREX.r3.3HG0320770.1.V3	superfamily	405254	103	221	1.19564e-05	44.7947	cl26012	Kinase-like superfamily	N	-
Q#80 - >HORVU.MOREX.r3.3HG0295710.1.V3	specific	459660	65	323	3.60289e-77	240.224	pfam00069	Pkinase	-	cl47491
Q#80 - >HORVU.MOREX.r3.3HG0295710.1.V3	superfamily	459660	65	323	3.60289e-77	240.224	cl47491	Pkinase superfamily	-	-
Q#80 - >HORVU.MOREX.r3.3HG0295710.1.V3	non-specific	462242	66	313	9.1986e-23	95.6412	pfam07714	PK_Tyr_Ser-Thr	-	cl47985
Q#80 - >HORVU.MOREX.r3.3HG0295710.1.V3	superfamily	462242	66	313	9.1986e-23	95.6412	cl47985	PK_Tyr_Ser-Thr superfamily	-	-
Q#80 - >HORVU.MOREX.r3.3HG0295710.1.V3	specific	463900	440	504	7.31452e-17	73.0565	pfam13499	EF-hand_7	-	cl38414
Q#80 - >HORVU.MOREX.r3.3HG0295710.1.V3	superfamily	463900	440	504	7.31452e-17	73.0565	cl38414	EF-hand_7 superfamily	-	-
Q#80 - >HORVU.MOREX.r3.3HG0295710.1.V3	specific	463900	371	432	2.33955e-14	66.1229	pfam13499	EF-hand_7	-	cl38414
Q#80 - >HORVU.MOREX.r3.3HG0295710.1.V3	superfamily	463900	371	432	2.33955e-14	66.1229	cl38414	EF-hand_7 superfamily	-	-
Q#80 - >HORVU.MOREX.r3.3HG0295710.1.V3	non-specific	404678	383	428	6.37164e-07	44.6133	pfam13833	EF-hand_8	-	cl08302
Q#80 - >HORVU.MOREX.r3.3HG0295710.1.V3	superfamily	415501	383	428	6.37164e-07	44.6133	cl08302	EFh superfamily	-	-
Q#80 - >HORVU.MOREX.r3.3HG0295710.1.V3	non-specific	425435	478	505	8.33085e-07	43.5434	pfam00036	EF-hand_1	-	cl37953
Q#80 - >HORVU.MOREX.r3.3HG0295710.1.V3	superfamily	425435	478	505	8.33085e-07	43.5434	cl37953	EF-hand_1 superfamily	-	-
Q#80 - >HORVU.MOREX.r3.3HG0295710.1.V3	non-specific	463869	443	471	1.10841e-06	43.3192	pfam13405	EF-hand_6	-	cl38409
Q#80 - >HORVU.MOREX.r3.3HG0295710.1.V3	superfamily	463869	443	471	1.10841e-06	43.3192	cl38409	EF-hand_6 superfamily	-	-
Q#80 - >HORVU.MOREX.r3.3HG0295710.1.V3	non-specific	404678	455	505	8.6868e-06	41.1465	pfam13833	EF-hand_8	-	cl08302
Q#80 - >HORVU.MOREX.r3.3HG0295710.1.V3	superfamily	415501	455	505	8.6868e-06	41.1465	cl08302	EFh superfamily	-	-
Q#80 - >HORVU.MOREX.r3.3HG0295710.1.V3	non-specific	463869	371	399	3.67668e-05	38.6968	pfam13405	EF-hand_6	-	cl38409
Q#80 - >HORVU.MOREX.r3.3HG0295710.1.V3	superfamily	463869	371	399	3.67668e-05	38.6968	cl38409	EF-hand_6 superfamily	-	-
Q#80 - >HORVU.MOREX.r3.3HG0295710.1.V3	non-specific	425435	371	398	4.97291e-05	38.5358	pfam00036	EF-hand_1	-	cl37953
Q#80 - >HORVU.MOREX.r3.3HG0295710.1.V3	superfamily	425435	371	398	4.97291e-05	38.5358	cl37953	EF-hand_1 superfamily	-	-
Q#80 - >HORVU.MOREX.r3.3HG0295710.1.V3	non-specific	425435	446	469	6.35612e-05	38.1506	pfam00036	EF-hand_1	-	cl37953
Q#80 - >HORVU.MOREX.r3.3HG0295710.1.V3	non-specific	425435	406	434	6.41883e-05	38.1506	pfam00036	EF-hand_1	-	cl37953
Q#80 - >HORVU.MOREX.r3.3HG0295710.1.V3	non-specific	405254	148	311	0.00049827	40.1723	pfam14531	Kinase-like	N	cl26012
Q#80 - >HORVU.MOREX.r3.3HG0295710.1.V3	superfamily	405254	148	311	0.00049827	40.1723	cl26012	Kinase-like superfamily	N	-
Q#80 - >HORVU.MOREX.r3.3HG0295710.1.V3	non-specific	433035	443	465	0.000602995	35.3729	pfam13202	EF-hand_5	-	cl23632
Q#80 - >HORVU.MOREX.r3.3HG0295710.1.V3	superfamily	433035	443	465	0.000602995	35.3729	cl23632	EF-hand_5 superfamily	-	-
Q#80 - >HORVU.MOREX.r3.3HG0295710.1.V3	non-specific	433035	371	393	0.00172455	34.2173	pfam13202	EF-hand_5	-	cl23632
Q#80 - >HORVU.MOREX.r3.3HG0295710.1.V3	superfamily	433035	371	393	0.00172455	34.2173	cl23632	EF-hand_5 superfamily	-	-
Q#80 - >HORVU.MOREX.r3.3HG0295710.1.V3	non-specific	463869	478	505	0.00335024	33.304	pfam13405	EF-hand_6	-	cl38409
Q#80 - >HORVU.MOREX.r3.3HG0295710.1.V3	non-specific	404678	418	463	0.00893425	32.6721	pfam13833	EF-hand_8	-	cl08302
Q#81 - >HORVU.MOREX.r3.3HG0273330.1.V3	specific	459660	68	326	1.68567e-75	235.601	pfam00069	Pkinase	-	cl47491
Q#81 - >HORVU.MOREX.r3.3HG0273330.1.V3	superfamily	459660	68	326	1.68567e-75	235.601	cl47491	Pkinase superfamily	-	-
Q#81 - >HORVU.MOREX.r3.3HG0273330.1.V3	non-specific	462242	69	323	1.84843e-22	94.8708	pfam07714	PK_Tyr_Ser-Thr	-	cl47985
Q#81 - >HORVU.MOREX.r3.3HG0273330.1.V3	superfamily	462242	69	323	1.84843e-22	94.8708	cl47985	PK_Tyr_Ser-Thr superfamily	-	-
Q#81 - >HORVU.MOREX.r3.3HG0273330.1.V3	specific	463900	443	506	5.77483e-17	73.4417	pfam13499	EF-hand_7	-	cl38414
Q#81 - >HORVU.MOREX.r3.3HG0273330.1.V3	superfamily	463900	443	506	5.77483e-17	73.4417	cl38414	EF-hand_7 superfamily	-	-
Q#81 - >HORVU.MOREX.r3.3HG0273330.1.V3	specific	463900	374	435	2.08456e-12	60.3449	pfam13499	EF-hand_7	-	cl38414
Q#81 - >HORVU.MOREX.r3.3HG0273330.1.V3	superfamily	463900	374	435	2.08456e-12	60.3449	cl38414	EF-hand_7 superfamily	-	-
Q#81 - >HORVU.MOREX.r3.3HG0273330.1.V3	non-specific	463900	407	471	7.3304e-09	50.3297	pfam13499	EF-hand_7	-	cl38414
Q#81 - >HORVU.MOREX.r3.3HG0273330.1.V3	superfamily	463900	407	471	7.3304e-09	50.3297	cl38414	EF-hand_7 superfamily	-	-
Q#81 - >HORVU.MOREX.r3.3HG0273330.1.V3	non-specific	404678	457	508	1.28932e-06	43.4577	pfam13833	EF-hand_8	-	cl08302
Q#81 - >HORVU.MOREX.r3.3HG0273330.1.V3	superfamily	415501	457	508	1.28932e-06	43.4577	cl08302	EFh superfamily	-	-
Q#81 - >HORVU.MOREX.r3.3HG0273330.1.V3	non-specific	404678	386	432	2.51401e-06	42.6873	pfam13833	EF-hand_8	-	cl08302
Q#81 - >HORVU.MOREX.r3.3HG0273330.1.V3	superfamily	415501	386	432	2.51401e-06	42.6873	cl08302	EFh superfamily	-	-
Q#81 - >HORVU.MOREX.r3.3HG0273330.1.V3	non-specific	425435	481	506	4.40019e-06	41.6174	pfam00036	EF-hand_1	-	cl37953
Q#81 - >HORVU.MOREX.r3.3HG0273330.1.V3	superfamily	425435	481	506	4.40019e-06	41.6174	cl37953	EF-hand_1 superfamily	-	-
Q#81 - >HORVU.MOREX.r3.3HG0273330.1.V3	non-specific	463869	446	474	1.22254e-05	40.2376	pfam13405	EF-hand_6	-	cl38409
Q#81 - >HORVU.MOREX.r3.3HG0273330.1.V3	superfamily	463869	446	474	1.22254e-05	40.2376	cl38409	EF-hand_6 superfamily	-	-
Q#81 - >HORVU.MOREX.r3.3HG0273330.1.V3	non-specific	405254	74	314	2.47405e-05	44.4095	pfam14531	Kinase-like	-	cl26012
Q#81 - >HORVU.MOREX.r3.3HG0273330.1.V3	superfamily	405254	74	314	2.47405e-05	44.4095	cl26012	Kinase-like superfamily	-	-
Q#81 - >HORVU.MOREX.r3.3HG0273330.1.V3	non-specific	463869	374	402	2.47807e-05	39.4672	pfam13405	EF-hand_6	-	cl38409
Q#81 - >HORVU.MOREX.r3.3HG0273330.1.V3	superfamily	463869	374	402	2.47807e-05	39.4672	cl38409	EF-hand_6 superfamily	-	-
Q#81 - >HORVU.MOREX.r3.3HG0273330.1.V3	non-specific	425435	445	472	4.58869e-05	38.5358	pfam00036	EF-hand_1	-	cl37953
Q#81 - >HORVU.MOREX.r3.3HG0273330.1.V3	non-specific	425435	374	401	4.72582e-05	38.5358	pfam00036	EF-hand_1	-	cl37953
Q#81 - >HORVU.MOREX.r3.3HG0273330.1.V3	superfamily	425435	374	401	4.72582e-05	38.5358	cl37953	EF-hand_1 superfamily	-	-
Q#81 - >HORVU.MOREX.r3.3HG0273330.1.V3	non-specific	425435	409	437	0.00073962	35.069	pfam00036	EF-hand_1	-	cl37953
Q#81 - >HORVU.MOREX.r3.3HG0273330.1.V3	non-specific	433035	374	395	0.00182582	33.8321	pfam13202	EF-hand_5	-	cl23632
Q#81 - >HORVU.MOREX.r3.3HG0273330.1.V3	superfamily	433035	374	395	0.00182582	33.8321	cl23632	EF-hand_5 superfamily	-	-
Q#81 - >HORVU.MOREX.r3.3HG0273330.1.V3	non-specific	433035	481	505	0.00374094	33.0617	pfam13202	EF-hand_5	-	cl23632
Q#81 - >HORVU.MOREX.r3.3HG0273330.1.V3	superfamily	433035	481	505	0.00374094	33.0617	cl23632	EF-hand_5 superfamily	-	-
Q#81 - >HORVU.MOREX.r3.3HG0273330.1.V3	non-specific	404678	354	398	0.00965013	32.6721	pfam13833	EF-hand_8	-	cl08302

## Sheet: Sheet 3
Sheet 3. Domain analyses of late embryogenesis abundant (LEA)
Query	Hit type	PSSM-ID	From	To	E-Value	Bitscore	Accession	Short name	Incomplete	Superfamily
Q#1 - >HORVU.MOREX.r3.6HG0622770.1.V3	specific	425561	9	155	1.19444e-12	61.3791	pfam00257	Dehydrin	-	cl20205
Q#1 - >HORVU.MOREX.r3.6HG0622770.1.V3	superfamily	425561	9	155	1.19444e-12	61.3791	cl20205	Dehydrin superfamily	-	-
Q#4 - >HORVU.MOREX.r3.6HG0602880.1.V3	non-specific	425561	168	235	3.47528e-08	51.364	pfam00257	Dehydrin	N	cl20205
Q#4 - >HORVU.MOREX.r3.6HG0602880.1.V3	superfamily	425561	168	235	3.47528e-08	51.364	cl20205	Dehydrin superfamily	N	-
Q#5 - >HORVU.MOREX.r3.6HG0569090.1.V3	non-specific	215609	61	215	6.1755e-22	89.4199	PLN03160	PLN03160	N	cl12118
Q#5 - >HORVU.MOREX.r3.6HG0569090.1.V3	superfamily	448410	61	215	6.1755e-22	89.4199	cl12118	LEA_2 superfamily	N	-
Q#5 - >HORVU.MOREX.r3.6HG0569090.1.V3	specific	427176	101	190	6.39483e-06	43.4593	pfam03168	LEA_2	-	cl12118
Q#5 - >HORVU.MOREX.r3.6HG0569090.1.V3	non-specific	214812	101	182	0.00512841	35.3178	smart00769	WHy	N	cl12118
Q#7 - >HORVU.MOREX.r3.6HG0602250.1.V3	specific	427176	73	173	3.55857e-12	60.0229	pfam03168	LEA_2	-	cl12118
Q#7 - >HORVU.MOREX.r3.6HG0602250.1.V3	superfamily	448410	73	173	3.55857e-12	60.0229	cl12118	LEA_2 superfamily	-	-
Q#7 - >HORVU.MOREX.r3.6HG0602250.1.V3	non-specific	444339	53	173	0.000372159	39.1702	COG5608	LEA	-	cl44268
Q#7 - >HORVU.MOREX.r3.6HG0602250.1.V3	superfamily	444339	53	173	0.000372159	39.1702	cl44268	LEA superfamily	-	-
Q#7 - >HORVU.MOREX.r3.6HG0602250.1.V3	non-specific	214812	54	119	0.000483358	38.0142	smart00769	WHy	C	cl12118
Q#11 - >HORVU.MOREX.r3.6HG0622790.1.V3	specific	425561	15	191	4.00599e-17	74.0907	pfam00257	Dehydrin	-	cl20205
Q#11 - >HORVU.MOREX.r3.6HG0622790.1.V3	superfamily	425561	15	191	4.00599e-17	74.0907	cl20205	Dehydrin superfamily	-	-
Q#12 - >HORVU.MOREX.r3.6HG0548110.1.V3	non-specific	425561	22	141	9.69841e-07	45.2008	pfam00257	Dehydrin	N	cl20205
Q#12 - >HORVU.MOREX.r3.6HG0548110.1.V3	superfamily	425561	22	141	9.69841e-07	45.2008	cl20205	Dehydrin superfamily	N	-
Q#14 - >HORVU.MOREX.r3.2HG0209950.1.V3	specific	427176	126	227	0.000318909	38.8369	pfam03168	LEA_2	-	cl12118
Q#14 - >HORVU.MOREX.r3.2HG0209950.1.V3	superfamily	448410	126	227	0.000318909	38.8369	cl12118	LEA_2 superfamily	-	-
Q#15 - >HORVU.MOREX.r3.2HG0197000.1.V3	specific	427491	1	71	8.09314e-15	63.4885	pfam03760	LEA_1	-	cl04248
Q#15 - >HORVU.MOREX.r3.2HG0197000.1.V3	superfamily	427491	1	71	8.09314e-15	63.4885	cl04248	LEA_1 superfamily	-	-
Q#16 - >HORVU.MOREX.r3.2HG0139280.1.V3	specific	427176	81	179	2.01451e-10	55.4005	pfam03168	LEA_2	-	cl12118
Q#16 - >HORVU.MOREX.r3.2HG0139280.1.V3	superfamily	448410	81	179	2.01451e-10	55.4005	cl12118	LEA_2 superfamily	-	-
Q#17 - >HORVU.MOREX.r3.2HG0135210.1.V3	specific	427176	73	176	4.45632e-09	51.9337	pfam03168	LEA_2	-	cl12118
Q#17 - >HORVU.MOREX.r3.2HG0135210.1.V3	superfamily	448410	73	176	4.45632e-09	51.9337	cl12118	LEA_2 superfamily	-	-
Q#18 - >HORVU.MOREX.r3.2HG0140450.1.V3	non-specific	215609	2	180	5.45472e-23	91.7311	PLN03160	PLN03160	-	cl12118
Q#18 - >HORVU.MOREX.r3.2HG0140450.1.V3	superfamily	448410	2	180	5.45472e-23	91.7311	cl12118	LEA_2 superfamily	-	-
Q#18 - >HORVU.MOREX.r3.2HG0140450.1.V3	specific	427176	71	172	1.94602e-06	44.6149	pfam03168	LEA_2	-	cl12118
Q#19 - >HORVU.MOREX.r3.2HG0140470.1.V3	non-specific	215609	2	169	1.39545e-10	58.2187	PLN03160	PLN03160	-	cl12118
Q#19 - >HORVU.MOREX.r3.2HG0140470.1.V3	superfamily	448410	2	169	1.39545e-10	58.2187	cl12118	LEA_2 superfamily	-	-
Q#20 - >HORVU.MOREX.r3.2HG0124050.1.V3	specific	427176	128	233	3.92643e-07	47.3113	pfam03168	LEA_2	-	cl12118
Q#20 - >HORVU.MOREX.r3.2HG0124050.1.V3	superfamily	448410	128	233	3.92643e-07	47.3113	cl12118	LEA_2 superfamily	-	-
Q#21 - >HORVU.MOREX.r3.2HG0096290.1.V3	specific	427176	108	194	6.13251e-05	40.7629	pfam03168	LEA_2	-	cl12118
Q#21 - >HORVU.MOREX.r3.2HG0096290.1.V3	superfamily	448410	108	194	6.13251e-05	40.7629	cl12118	LEA_2 superfamily	-	-
Q#22 - >HORVU.MOREX.r3.2HG0213820.1.V3	specific	427176	84	187	2.1118e-09	52.7041	pfam03168	LEA_2	-	cl12118
Q#22 - >HORVU.MOREX.r3.2HG0213820.1.V3	superfamily	448410	84	187	2.1118e-09	52.7041	cl12118	LEA_2 superfamily	-	-
Q#23 - >HORVU.MOREX.r3.2HG0198570.1.V3	specific	427176	82	187	0.00402776	35.3701	pfam03168	LEA_2	-	cl12118
Q#23 - >HORVU.MOREX.r3.2HG0198570.1.V3	superfamily	448410	82	187	0.00402776	35.3701	cl12118	LEA_2 superfamily	-	-
Q#24 - >HORVU.MOREX.r3.2HG0213800.1.V3	specific	427176	80	184	8.84758e-09	51.1633	pfam03168	LEA_2	-	cl12118
Q#24 - >HORVU.MOREX.r3.2HG0213800.1.V3	superfamily	448410	80	184	8.84758e-09	51.1633	cl12118	LEA_2 superfamily	-	-
Q#26 - >HORVU.MOREX.r3.2HG0167300.1.V3	specific	427176	72	175	7.50127e-07	46.1557	pfam03168	LEA_2	-	cl12118
Q#26 - >HORVU.MOREX.r3.2HG0167300.1.V3	superfamily	448410	72	175	7.50127e-07	46.1557	cl12118	LEA_2 superfamily	-	-
Q#28 - >HORVU.MOREX.r3.2HG0140430.1.V3	non-specific	215609	58	171	2.22131e-11	60.1447	PLN03160	PLN03160	N	cl12118
Q#28 - >HORVU.MOREX.r3.2HG0140430.1.V3	superfamily	448410	58	171	2.22131e-11	60.1447	cl12118	LEA_2 superfamily	N	-
Q#28 - >HORVU.MOREX.r3.2HG0140430.1.V3	specific	427176	70	127	7.88018e-05	39.9925	pfam03168	LEA_2	C	cl12118
Q#29 - >HORVU.MOREX.r3.2HG0197010.1.V3	specific	427491	1	71	5.03061e-13	58.8661	pfam03760	LEA_1	-	cl04248
Q#29 - >HORVU.MOREX.r3.2HG0197010.1.V3	superfamily	427491	1	71	5.03061e-13	58.8661	cl04248	LEA_1 superfamily	-	-
Q#30 - >HORVU.MOREX.r3.4HG0390200.1.V3	specific	427176	121	218	4.79512e-10	55.0153	pfam03168	LEA_2	-	cl12118
Q#30 - >HORVU.MOREX.r3.4HG0390200.1.V3	superfamily	448410	121	218	4.79512e-10	55.0153	cl12118	LEA_2 superfamily	-	-
Q#31 - >HORVU.MOREX.r3.4HG0335550.1.V3	specific	427176	117	211	1.02786e-10	56.9413	pfam03168	LEA_2	-	cl12118
Q#31 - >HORVU.MOREX.r3.4HG0335550.1.V3	superfamily	448410	117	211	1.02786e-10	56.9413	cl12118	LEA_2 superfamily	-	-
Q#31 - >HORVU.MOREX.r3.4HG0335550.1.V3	non-specific	444339	85	214	1.35642e-06	46.489	COG5608	LEA	-	cl44268
Q#31 - >HORVU.MOREX.r3.4HG0335550.1.V3	superfamily	444339	85	214	1.35642e-06	46.489	cl44268	LEA superfamily	-	-
Q#31 - >HORVU.MOREX.r3.4HG0335550.1.V3	non-specific	215609	89	235	3.88053e-06	46.2775	PLN03160	PLN03160	N	cl12118
Q#31 - >HORVU.MOREX.r3.4HG0335550.1.V3	non-specific	214812	100	187	0.000746997	37.629	smart00769	WHy	-	cl12118
Q#32 - >HORVU.MOREX.r3.4HG0380150.1.V3	specific	111833	183	226	0.000533431	37.2881	pfam02987	LEA_4	-	cl03821
Q#32 - >HORVU.MOREX.r3.4HG0380150.1.V3	superfamily	111833	183	226	0.000533431	37.2881	cl03821	LEA_4 superfamily	-	-
Q#32 - >HORVU.MOREX.r3.4HG0380150.1.V3	specific	111833	95	138	0.00284679	35.3621	pfam02987	LEA_4	-	cl03821
Q#32 - >HORVU.MOREX.r3.4HG0380150.1.V3	superfamily	111833	95	138	0.00284679	35.3621	cl03821	LEA_4 superfamily	-	-
Q#32 - >HORVU.MOREX.r3.4HG0380150.1.V3	non-specific	111833	117	160	0.00287499	35.3621	pfam02987	LEA_4	-	cl03821
Q#32 - >HORVU.MOREX.r3.4HG0380150.1.V3	non-specific	237855	138	252	0.00412496	39.2048	PRK14900	valS	N	cl36437
Q#32 - >HORVU.MOREX.r3.4HG0380150.1.V3	superfamily	237855	138	252	0.00412496	39.2048	cl36437	valS superfamily	N	-
Q#33 - >HORVU.MOREX.r3.4HG0356870.1.V3	specific	427176	137	238	0.000538536	38.4517	pfam03168	LEA_2	-	cl12118
Q#33 - >HORVU.MOREX.r3.4HG0356870.1.V3	superfamily	448410	137	238	0.000538536	38.4517	cl12118	LEA_2 superfamily	-	-
Q#34 - >HORVU.MOREX.r3.4HG0403120.1.V3	non-specific	173412	2	461	0.000287878	43.5911	PTZ00121	PTZ00121	N	cl31754
Q#34 - >HORVU.MOREX.r3.4HG0403120.1.V3	superfamily	173412	2	461	0.000287878	43.5911	cl31754	PTZ00121 superfamily	N	-
Q#34 - >HORVU.MOREX.r3.4HG0403120.1.V3	non-specific	173412	81	462	0.00197897	40.8947	PTZ00121	PTZ00121	N	cl31754
Q#34 - >HORVU.MOREX.r3.4HG0403120.1.V3	non-specific	173412	5	458	0.00345265	40.1243	PTZ00121	PTZ00121	N	cl31754
Q#35 - >HORVU.MOREX.r3.4HG0353320.1.V3	non-specific	215609	65	226	1.69107e-15	72.4711	PLN03160	PLN03160	N	cl12118
Q#35 - >HORVU.MOREX.r3.4HG0353320.1.V3	superfamily	448410	65	226	1.69107e-15	72.4711	cl12118	LEA_2 superfamily	N	-
Q#35 - >HORVU.MOREX.r3.4HG0353320.1.V3	non-specific	214812	99	167	5.33353e-07	46.4886	smart00769	WHy	C	cl12118
Q#35 - >HORVU.MOREX.r3.4HG0353320.1.V3	specific	427176	107	203	6.9321e-07	46.1557	pfam03168	LEA_2	-	cl12118
Q#35 - >HORVU.MOREX.r3.4HG0353320.1.V3	non-specific	444339	71	159	0.000240086	39.9406	COG5608	LEA	C	cl44268
Q#35 - >HORVU.MOREX.r3.4HG0353320.1.V3	superfamily	444339	71	159	0.000240086	39.9406	cl44268	LEA superfamily	C	-
Q#36 - >HORVU.MOREX.r3.4HG0339950.1.V3	specific	425561	354	426	7.56139e-10	57.1419	pfam00257	Dehydrin	N	cl20205
Q#36 - >HORVU.MOREX.r3.4HG0339950.1.V3	superfamily	425561	354	426	7.56139e-10	57.1419	cl20205	Dehydrin superfamily	N	-
Q#36 - >HORVU.MOREX.r3.4HG0339950.1.V3	non-specific	468206	42	153	0.000149537	44.611	NF033849	ser_rich_anae_1	NC	cl41472
Q#36 - >HORVU.MOREX.r3.4HG0339950.1.V3	superfamily	468206	42	153	0.000149537	44.611	cl41472	ser_rich_anae_1 superfamily	NC	-
Q#36 - >HORVU.MOREX.r3.4HG0339950.1.V3	non-specific	425561	406	485	0.00267894	38.2672	pfam00257	Dehydrin	N	cl20205
Q#36 - >HORVU.MOREX.r3.4HG0339950.1.V3	superfamily	425561	406	485	0.00267894	38.2672	cl20205	Dehydrin superfamily	N	-
Q#38 - >HORVU.MOREX.r3.4HG0401690.1.V3	specific	461485	62	117	1.07153e-13	64.46	pfam04927	SMP	-	cl04848
Q#38 - >HORVU.MOREX.r3.4HG0401690.1.V3	superfamily	461485	62	117	1.07153e-13	64.46	cl04848	SMP superfamily	-	-
Q#38 - >HORVU.MOREX.r3.4HG0401690.1.V3	specific	461485	179	223	1.31327e-11	58.682	pfam04927	SMP	C	cl04848
Q#38 - >HORVU.MOREX.r3.4HG0401690.1.V3	superfamily	461485	179	223	1.31327e-11	58.682	cl04848	SMP superfamily	C	-
Q#38 - >HORVU.MOREX.r3.4HG0401690.1.V3	specific	461485	245	302	8.43986e-06	42.5036	pfam04927	SMP	-	cl04848
Q#38 - >HORVU.MOREX.r3.4HG0401690.1.V3	superfamily	461485	245	302	8.43986e-06	42.5036	cl04848	SMP superfamily	-	-
Q#40 - >HORVU.MOREX.r3.5HG0532580.1.V3	specific	444339	66	193	3.35616e-23	93.0982	COG5608	LEA	-	cl44268
Q#40 - >HORVU.MOREX.r3.5HG0532580.1.V3	superfamily	444339	66	193	3.35616e-23	93.0982	cl44268	LEA superfamily	-	-
Q#40 - >HORVU.MOREX.r3.5HG0532580.1.V3	specific	214812	73	167	1.52638e-20	84.6233	smart00769	WHy	-	cl12118
Q#40 - >HORVU.MOREX.r3.5HG0532580.1.V3	superfamily	448410	73	167	1.52638e-20	84.6233	cl12118	LEA_2 superfamily	-	-
Q#40 - >HORVU.MOREX.r3.5HG0532580.1.V3	specific	427176	92	188	3.16277e-19	81.2089	pfam03168	LEA_2	-	cl12118
Q#40 - >HORVU.MOREX.r3.5HG0532580.1.V3	specific	444339	191	313	3.35583e-17	76.9198	COG5608	LEA	-	cl44268
Q#40 - >HORVU.MOREX.r3.5HG0532580.1.V3	superfamily	444339	191	313	3.35583e-17	76.9198	cl44268	LEA superfamily	-	-
Q#40 - >HORVU.MOREX.r3.5HG0532580.1.V3	specific	427176	218	313	1.77664e-12	62.7193	pfam03168	LEA_2	-	cl12118
Q#40 - >HORVU.MOREX.r3.5HG0532580.1.V3	superfamily	448410	218	313	1.77664e-12	62.7193	cl12118	LEA_2 superfamily	-	-
Q#40 - >HORVU.MOREX.r3.5HG0532580.1.V3	non-specific	214812	199	298	4.71257e-12	61.5113	smart00769	WHy	-	cl12118
Q#41 - >HORVU.MOREX.r3.5HG0470900.1.V3	specific	427491	12	75	2.011e-07	46.1545	pfam03760	LEA_1	-	cl04248
Q#41 - >HORVU.MOREX.r3.5HG0470900.1.V3	superfamily	427491	12	75	2.011e-07	46.1545	cl04248	LEA_1 superfamily	-	-
Q#42 - >HORVU.MOREX.r3.5HG0530290.1.V3	specific	427176	86	177	0.000130068	39.6073	pfam03168	LEA_2	-	cl12118
Q#42 - >HORVU.MOREX.r3.5HG0530290.1.V3	superfamily	448410	86	177	0.000130068	39.6073	cl12118	LEA_2 superfamily	-	-
Q#43 - >HORVU.MOREX.r3.5HG0446860.1.V3	specific	427176	93	180	3.66942e-06	43.8445	pfam03168	LEA_2	-	cl12118
Q#43 - >HORVU.MOREX.r3.5HG0446860.1.V3	superfamily	448410	93	180	3.66942e-06	43.8445	cl12118	LEA_2 superfamily	-	-
Q#44 - >HORVU.MOREX.r3.5HG0470600.1.V3	specific	427176	81	182	4.14068e-06	43.8445	pfam03168	LEA_2	-	cl12118
Q#44 - >HORVU.MOREX.r3.5HG0470600.1.V3	superfamily	448410	81	182	4.14068e-06	43.8445	cl12118	LEA_2 superfamily	-	-
Q#45 - >HORVU.MOREX.r3.5HG0458120.1.V3	specific	427176	68	184	0.000470477	38.0665	pfam03168	LEA_2	-	cl12118
Q#45 - >HORVU.MOREX.r3.5HG0458120.1.V3	superfamily	448410	68	184	0.000470477	38.0665	cl12118	LEA_2 superfamily	-	-
Q#46 - >HORVU.MOREX.r3.5HG0510220.1.V3	specific	461485	53	104	1.79272e-13	59.4524	pfam04927	SMP	-	cl04848
Q#46 - >HORVU.MOREX.r3.5HG0510220.1.V3	superfamily	461485	53	104	1.79272e-13	59.4524	cl04848	SMP superfamily	-	-
Q#47 - >HORVU.MOREX.r3.5HG0424060.1.V3	specific	461485	89	148	0.000714384	36.7256	pfam04927	SMP	-	cl04848
Q#47 - >HORVU.MOREX.r3.5HG0424060.1.V3	superfamily	461485	89	148	0.000714384	36.7256	cl04848	SMP superfamily	-	-
Q#48 - >HORVU.MOREX.r3.5HG0507390.1.V3	specific	425561	45	139	7.04151e-19	77.1723	pfam00257	Dehydrin	N	cl20205
Q#48 - >HORVU.MOREX.r3.5HG0507390.1.V3	superfamily	425561	45	139	7.04151e-19	77.1723	cl20205	Dehydrin superfamily	N	-
Q#50 - >HORVU.MOREX.r3.5HG0528290.1.V3	non-specific	215609	107	251	2.98715e-07	49.7443	PLN03160	PLN03160	N	cl12118
Q#50 - >HORVU.MOREX.r3.5HG0528290.1.V3	superfamily	448410	107	251	2.98715e-07	49.7443	cl12118	LEA_2 superfamily	N	-
Q#50 - >HORVU.MOREX.r3.5HG0528290.1.V3	specific	427176	134	230	2.43061e-06	45.0001	pfam03168	LEA_2	-	cl12118
Q#50 - >HORVU.MOREX.r3.5HG0528290.1.V3	non-specific	444339	101	229	0.00218369	37.2442	COG5608	LEA	-	cl44268
Q#50 - >HORVU.MOREX.r3.5HG0528290.1.V3	superfamily	444339	101	229	0.00218369	37.2442	cl44268	LEA superfamily	-	-
Q#51 - >HORVU.MOREX.r3.5HG0458100.1.V3	specific	427176	75	178	4.13474e-09	51.9337	pfam03168	LEA_2	-	cl12118
Q#51 - >HORVU.MOREX.r3.5HG0458100.1.V3	superfamily	448410	75	178	4.13474e-09	51.9337	cl12118	LEA_2 superfamily	-	-
Q#53 - >HORVU.MOREX.r3.5HG0516830.1.V3	specific	425561	36	146	1.12675e-20	81.7947	pfam00257	Dehydrin	N	cl20205
Q#53 - >HORVU.MOREX.r3.5HG0516830.1.V3	superfamily	425561	36	146	1.12675e-20	81.7947	cl20205	Dehydrin superfamily	N	-
Q#54 - >HORVU.MOREX.r3.5HG0463010.1.V3	specific	427176	143	248	2.39609e-08	50.7781	pfam03168	LEA_2	-	cl12118
Q#54 - >HORVU.MOREX.r3.5HG0463010.1.V3	superfamily	448410	143	248	2.39609e-08	50.7781	cl12118	LEA_2 superfamily	-	-
Q#55 - >HORVU.MOREX.r3.5HG0489910.1.V3	non-specific	371207	18	112	2.34314e-14	62.5585	pfam10714	LEA_6	-	cl11310
Q#55 - >HORVU.MOREX.r3.5HG0489910.1.V3	superfamily	371207	18	112	2.34314e-14	62.5585	cl11310	LEA_6 superfamily	-	-
Q#56 - >HORVU.MOREX.r3.5HG0481100.1.V3	specific	427176	103	191	1.20448e-06	45.7705	pfam03168	LEA_2	-	cl12118
Q#56 - >HORVU.MOREX.r3.5HG0481100.1.V3	superfamily	448410	103	191	1.20448e-06	45.7705	cl12118	LEA_2 superfamily	-	-
Q#57 - >HORVU.MOREX.r3.5HG0507410.1.V3	specific	425561	8	137	8.07914e-18	74.4759	pfam00257	Dehydrin	-	cl20205
Q#57 - >HORVU.MOREX.r3.5HG0507410.1.V3	superfamily	425561	8	137	8.07914e-18	74.4759	cl20205	Dehydrin superfamily	-	-
Q#58 - >HORVU.MOREX.r3.5HG0527260.1.V3	specific	427176	73	176	1.13138e-08	50.7781	pfam03168	LEA_2	-	cl12118
Q#58 - >HORVU.MOREX.r3.5HG0527260.1.V3	superfamily	448410	73	176	1.13138e-08	50.7781	cl12118	LEA_2 superfamily	-	-
Q#59 - >HORVU.MOREX.r3.5HG0470950.1.V3	specific	427491	10	76	8.88688e-05	37.6802	pfam03760	LEA_1	-	cl04248
Q#59 - >HORVU.MOREX.r3.5HG0470950.1.V3	superfamily	427491	10	76	8.88688e-05	37.6802	cl04248	LEA_1 superfamily	-	-
Q#60 - >HORVU.MOREX.r3.7HG0675510.1.V3	specific	427491	1	70	5.21678e-10	50.0065	pfam03760	LEA_1	-	cl04248
Q#60 - >HORVU.MOREX.r3.7HG0675510.1.V3	superfamily	427491	1	70	5.21678e-10	50.0065	cl04248	LEA_1 superfamily	-	-
Q#62 - >HORVU.MOREX.r3.7HG0707750.1.V3	specific	427176	82	184	3.49978e-09	52.3189	pfam03168	LEA_2	-	cl12118
Q#62 - >HORVU.MOREX.r3.7HG0707750.1.V3	superfamily	448410	82	184	3.49978e-09	52.3189	cl12118	LEA_2 superfamily	-	-
Q#63 - >HORVU.MOREX.r3.7HG0707700.1.V3	specific	427176	76	179	3.39609e-08	49.6225	pfam03168	LEA_2	-	cl12118
Q#63 - >HORVU.MOREX.r3.7HG0707700.1.V3	superfamily	448410	76	179	3.39609e-08	49.6225	cl12118	LEA_2 superfamily	-	-
Q#64 - >HORVU.MOREX.r3.7HG0711550.1.V3	specific	461485	211	269	4.67944e-10	54.4448	pfam04927	SMP	-	cl04848
Q#64 - >HORVU.MOREX.r3.7HG0711550.1.V3	superfamily	461485	211	269	4.67944e-10	54.4448	cl04848	SMP superfamily	-	-
Q#64 - >HORVU.MOREX.r3.7HG0711550.1.V3	specific	461485	146	190	7.56262e-08	48.2816	pfam04927	SMP	C	cl04848
Q#64 - >HORVU.MOREX.r3.7HG0711550.1.V3	superfamily	461485	146	190	7.56262e-08	48.2816	cl04848	SMP superfamily	C	-
Q#65 - >HORVU.MOREX.r3.7HG0642100.1.V3	specific	427491	1	71	7.95247e-11	52.7029	pfam03760	LEA_1	-	cl04248
Q#65 - >HORVU.MOREX.r3.7HG0642100.1.V3	superfamily	427491	1	71	7.95247e-11	52.7029	cl04248	LEA_1 superfamily	-	-
Q#66 - >HORVU.MOREX.r3.7HG0637810.1.V3	specific	427491	1	71	2.89046e-11	54.6289	pfam03760	LEA_1	-	cl04248
Q#66 - >HORVU.MOREX.r3.7HG0637810.1.V3	superfamily	427491	1	71	2.89046e-11	54.6289	cl04248	LEA_1 superfamily	-	-
Q#67 - >HORVU.MOREX.r3.7HG0689310.1.V3	specific	214812	59	158	7.5317e-19	77.6897	smart00769	WHy	-	cl12118
Q#67 - >HORVU.MOREX.r3.7HG0689310.1.V3	superfamily	448410	59	158	7.5317e-19	77.6897	cl12118	LEA_2 superfamily	-	-
Q#67 - >HORVU.MOREX.r3.7HG0689310.1.V3	specific	427176	78	176	1.77028e-08	50.3929	pfam03168	LEA_2	-	cl12118
Q#67 - >HORVU.MOREX.r3.7HG0689310.1.V3	non-specific	215609	72	125	0.000288088	40.4995	PLN03160	PLN03160	NC	cl12118
Q#67 - >HORVU.MOREX.r3.7HG0689310.1.V3	non-specific	444339	46	171	0.000383725	39.1702	COG5608	LEA	-	cl44268
Q#67 - >HORVU.MOREX.r3.7HG0689310.1.V3	superfamily	444339	46	171	0.000383725	39.1702	cl44268	LEA superfamily	-	-
Q#69 - >HORVU.MOREX.r3.7HG0730410.1.V3	specific	427491	14	78	1.10232e-06	43.4581	pfam03760	LEA_1	-	cl04248
Q#69 - >HORVU.MOREX.r3.7HG0730410.1.V3	superfamily	427491	14	78	1.10232e-06	43.4581	cl04248	LEA_1 superfamily	-	-
Q#70 - >HORVU.MOREX.r3.7HG0683720.1.V3	non-specific	215609	62	216	4.27934e-28	105.598	PLN03160	PLN03160	N	cl12118
Q#70 - >HORVU.MOREX.r3.7HG0683720.1.V3	superfamily	448410	62	216	4.27934e-28	105.598	cl12118	LEA_2 superfamily	N	-
Q#70 - >HORVU.MOREX.r3.7HG0683720.1.V3	specific	427176	97	188	1.21026e-07	48.0817	pfam03168	LEA_2	-	cl12118
Q#70 - >HORVU.MOREX.r3.7HG0683720.1.V3	non-specific	214812	93	167	2.23973e-05	41.8662	smart00769	WHy	-	cl12118
Q#70 - >HORVU.MOREX.r3.7HG0683720.1.V3	non-specific	444339	68	180	0.00332248	36.4738	COG5608	LEA	-	cl44268
Q#70 - >HORVU.MOREX.r3.7HG0683720.1.V3	superfamily	444339	68	180	0.00332248	36.4738	cl44268	LEA superfamily	-	-
Q#71 - >HORVU.MOREX.r3.7HG0749500.1.V3	specific	427176	75	178	5.46641e-10	54.2449	pfam03168	LEA_2	-	cl12118
Q#71 - >HORVU.MOREX.r3.7HG0749500.1.V3	superfamily	448410	75	178	5.46641e-10	54.2449	cl12118	LEA_2 superfamily	-	-
Q#73 - >HORVU.MOREX.r3.1HG0055610.1.V3	specific	427176	77	183	7.99584e-05	40.3777	pfam03168	LEA_2	-	cl12118
Q#73 - >HORVU.MOREX.r3.1HG0055610.1.V3	superfamily	448410	77	183	7.99584e-05	40.3777	cl12118	LEA_2 superfamily	-	-
Q#74 - >HORVU.MOREX.r3.1HG0031210.1.V3	specific	427176	119	223	0.00101555	37.6813	pfam03168	LEA_2	-	cl12118
Q#74 - >HORVU.MOREX.r3.1HG0031210.1.V3	superfamily	448410	119	223	0.00101555	37.6813	cl12118	LEA_2 superfamily	-	-
Q#75 - >HORVU.MOREX.r3.1HG0080000.1.V3	non-specific	235334	16	170	0.00378804	37.6199	PRK05035	PRK05035	N	cl47132
Q#75 - >HORVU.MOREX.r3.1HG0080000.1.V3	superfamily	481472	16	170	0.00378804	37.6199	cl47132	PRK05035 superfamily	N	-
Q#75 - >HORVU.MOREX.r3.1HG0080000.1.V3	specific	111833	29	70	0.00633982	33.4361	pfam02987	LEA_4	-	cl03821
Q#75 - >HORVU.MOREX.r3.1HG0080000.1.V3	superfamily	111833	29	70	0.00633982	33.4361	cl03821	LEA_4 superfamily	-	-
Q#75 - >HORVU.MOREX.r3.1HG0080000.1.V3	non-specific	111833	38	81	0.00714618	33.4361	pfam02987	LEA_4	-	cl03821
Q#76 - >HORVU.MOREX.r3.1HG0046460.1.V3	specific	427176	137	239	9.02037e-11	57.3265	pfam03168	LEA_2	-	cl12118
Q#76 - >HORVU.MOREX.r3.1HG0046460.1.V3	superfamily	448410	137	239	9.02037e-11	57.3265	cl12118	LEA_2 superfamily	-	-
Q#78 - >HORVU.MOREX.r3.1HG0082740.1.V3	non-specific	215609	89	228	8.05585e-34	121.391	PLN03160	PLN03160	N	cl12118
Q#78 - >HORVU.MOREX.r3.1HG0082740.1.V3	superfamily	448410	89	228	8.05585e-34	121.391	cl12118	LEA_2 superfamily	N	-
Q#78 - >HORVU.MOREX.r3.1HG0082740.1.V3	specific	427176	119	219	4.89302e-11	58.0969	pfam03168	LEA_2	-	cl12118
Q#78 - >HORVU.MOREX.r3.1HG0082740.1.V3	non-specific	214812	101	168	0.00214978	36.4734	smart00769	WHy	C	cl12118
Q#80 - >HORVU.MOREX.r3.1HG0092810.1.V3	specific	427176	84	181	5.10315e-22	85.8313	pfam03168	LEA_2	-	cl12118
Q#80 - >HORVU.MOREX.r3.1HG0092810.1.V3	superfamily	448410	84	181	5.10315e-22	85.8313	cl12118	LEA_2 superfamily	-	-
Q#80 - >HORVU.MOREX.r3.1HG0092810.1.V3	specific	214812	66	165	3.29037e-21	83.8529	smart00769	WHy	-	cl12118
Q#80 - >HORVU.MOREX.r3.1HG0092810.1.V3	non-specific	444339	61	187	5.36297e-15	68.8306	COG5608	LEA	-	cl44268
Q#80 - >HORVU.MOREX.r3.1HG0092810.1.V3	superfamily	444339	61	187	5.36297e-15	68.8306	cl44268	LEA superfamily	-	-
Q#81 - >HORVU.MOREX.r3.1HG0070590.1.V3	non-specific	215609	76	200	3.12866e-18	79.4047	PLN03160	PLN03160	N	cl12118
Q#81 - >HORVU.MOREX.r3.1HG0070590.1.V3	superfamily	448410	76	200	3.12866e-18	79.4047	cl12118	LEA_2 superfamily	N	-
Q#81 - >HORVU.MOREX.r3.1HG0070590.1.V3	specific	427176	83	177	1.35873e-11	58.4821	pfam03168	LEA_2	-	cl12118
Q#81 - >HORVU.MOREX.r3.1HG0070590.1.V3	non-specific	214812	75	142	1.30888e-07	48.0294	smart00769	WHy	-	cl12118
Q#81 - >HORVU.MOREX.r3.1HG0070590.1.V3	non-specific	444339	54	170	2.33635e-06	45.3334	COG5608	LEA	-	cl44268
Q#81 - >HORVU.MOREX.r3.1HG0070590.1.V3	superfamily	444339	54	170	2.33635e-06	45.3334	cl44268	LEA superfamily	-	-
Q#82 - >HORVU.MOREX.r3.3HG0248640.1.V3	specific	240633	8	307	4.46079e-174	494.295	cd12156	HPPR	-	cl21454
Q#82 - >HORVU.MOREX.r3.3HG0248640.1.V3	superfamily	473865	8	307	4.46079e-174	494.295	cl21454	NADB_Rossmann superfamily	-	-
Q#82 - >HORVU.MOREX.r3.3HG0248640.1.V3	specific	440672	8	318	8.13688e-119	354.01	COG1052	LdhA	-	cl43317
Q#82 - >HORVU.MOREX.r3.3HG0248640.1.V3	superfamily	440672	8	318	8.13688e-119	354.01	cl43317	LdhA superfamily	-	-
Q#82 - >HORVU.MOREX.r3.3HG0248640.1.V3	non-specific	240626	8	305	9.52177e-109	327.814	cd05301	GDH	-	cl21454
Q#82 - >HORVU.MOREX.r3.3HG0248640.1.V3	non-specific	240622	8	302	2.93914e-89	277.588	cd05198	formate_dh_like	-	cl21454
Q#82 - >HORVU.MOREX.r3.3HG0248640.1.V3	non-specific	240645	8	307	1.93108e-87	273.269	cd12168	Mand_dh_like	-	cl21454
Q#82 - >HORVU.MOREX.r3.3HG0248640.1.V3	non-specific	439881	8	306	2.67035e-86	270.141	COG0111	SerA	-	cl43027
Q#82 - >HORVU.MOREX.r3.3HG0248640.1.V3	superfamily	439881	8	306	2.67035e-86	270.141	cl43027	SerA superfamily	-	-
Q#82 - >HORVU.MOREX.r3.3HG0248640.1.V3	non-specific	240655	62	301	5.20789e-79	251.386	cd12178	2-Hacid_dh_13	-	cl21454
Q#82 - >HORVU.MOREX.r3.3HG0248640.1.V3	non-specific	240649	35	297	1.4914e-77	247.401	cd12172	PGDH_like_2	-	cl21454
Q#82 - >HORVU.MOREX.r3.3HG0248640.1.V3	non-specific	183914	62	305	1.27926e-75	243.162	PRK13243	PRK13243	-	cl21454
Q#82 - >HORVU.MOREX.r3.3HG0248640.1.V3	non-specific	240652	8	300	1.2569e-73	237.086	cd12175	2-Hacid_dh_11	-	cl21454
Q#82 - >HORVU.MOREX.r3.3HG0248640.1.V3	non-specific	240624	18	286	1.82628e-71	231.634	cd05299	CtBP_dh	-	cl21454
Q#82 - >HORVU.MOREX.r3.3HG0248640.1.V3	non-specific	240650	8	300	4.87217e-70	227.684	cd12173	PGDH_4	-	cl21454
Q#82 - >HORVU.MOREX.r3.3HG0248640.1.V3	specific	425656	8	306	6.80407e-67	219.469	pfam00389	2-Hacid_dh	-	cl21454
Q#82 - >HORVU.MOREX.r3.3HG0248640.1.V3	non-specific	427007	113	286	1.40145e-63	206.193	pfam02826	2-Hacid_dh_C	-	cl21454
Q#82 - >HORVU.MOREX.r3.3HG0248640.1.V3	non-specific	240628	62	306	5.94791e-63	208.931	cd05303	PGDH_2	-	cl21454
Q#82 - >HORVU.MOREX.r3.3HG0248640.1.V3	non-specific	240638	63	307	7.46988e-62	206.687	cd12161	GDH_like_1	-	cl21454
Q#82 - >HORVU.MOREX.r3.3HG0248640.1.V3	non-specific	240639	62	307	1.59277e-61	205.379	cd12162	2-Hacid_dh_4	-	cl21454
Q#82 - >HORVU.MOREX.r3.3HG0248640.1.V3	non-specific	240634	8	297	1.54336e-59	200.592	cd12157	PTDH	-	cl21454
Q#82 - >HORVU.MOREX.r3.3HG0248640.1.V3	non-specific	185307	8	297	6.48484e-58	196.512	PRK15409	PRK15409	-	cl21454
Q#82 - >HORVU.MOREX.r3.3HG0248640.1.V3	non-specific	240625	8	306	3.08915e-56	191.581	cd05300	2-Hacid_dh_1	-	cl21454
Q#82 - >HORVU.MOREX.r3.3HG0248640.1.V3	non-specific	240648	63	292	1.25168e-54	187.36	cd12171	2-Hacid_dh_10	-	cl21454
Q#82 - >HORVU.MOREX.r3.3HG0248640.1.V3	non-specific	240620	59	298	1.98107e-51	179.034	cd01619	LDH_like	-	cl21454
Q#82 - >HORVU.MOREX.r3.3HG0248640.1.V3	non-specific	240654	67	303	1.2565e-50	176.743	cd12177	2-Hacid_dh_12	-	cl21454
Q#82 - >HORVU.MOREX.r3.3HG0248640.1.V3	non-specific	240646	62	300	7.92977e-48	168.844	cd12169	PGDH_like_1	-	cl21454
Q#82 - >HORVU.MOREX.r3.3HG0248640.1.V3	non-specific	240642	36	302	1.04095e-47	168.961	cd12165	2-Hacid_dh_6	-	cl21454
Q#82 - >HORVU.MOREX.r3.3HG0248640.1.V3	non-specific	240644	8	302	1.68667e-44	160.42	cd12167	2-Hacid_dh_8	-	cl21454
Q#82 - >HORVU.MOREX.r3.3HG0248640.1.V3	non-specific	240632	58	307	3.9587e-44	159.284	cd12155	PGDH_1	-	cl21454
Q#82 - >HORVU.MOREX.r3.3HG0248640.1.V3	non-specific	240651	35	291	1.39027e-43	157.337	cd12174	PGDH_like_3	-	cl21454
Q#82 - >HORVU.MOREX.r3.3HG0248640.1.V3	non-specific	240653	62	297	2.70655e-43	156.585	cd12176	PGDH_3	-	cl21454
Q#82 - >HORVU.MOREX.r3.3HG0248640.1.V3	non-specific	240663	62	291	3.04123e-43	157.052	cd12187	LDH_like_1	-	cl21454
Q#82 - >HORVU.MOREX.r3.3HG0248640.1.V3	non-specific	240656	62	297	1.44153e-42	154.759	cd12179	2-Hacid_dh_14	-	cl21454
Q#82 - >HORVU.MOREX.r3.3HG0248640.1.V3	non-specific	181414	62	307	2.35756e-42	154.372	PRK08410	PRK08410	-	cl30767
Q#82 - >HORVU.MOREX.r3.3HG0248640.1.V3	superfamily	181414	62	307	2.35756e-42	154.372	cl30767	PRK08410 superfamily	-	-
Q#82 - >HORVU.MOREX.r3.3HG0248640.1.V3	non-specific	240636	68	302	4.82186e-41	150.494	cd12159	2-Hacid_dh_2	-	cl21454
Q#82 - >HORVU.MOREX.r3.3HG0248640.1.V3	non-specific	240641	8	306	1.98935e-40	148.798	cd12164	GDH_like_2	-	cl21454
Q#82 - >HORVU.MOREX.r3.3HG0248640.1.V3	non-specific	240643	37	300	5.20056e-40	147.351	cd12166	2-Hacid_dh_7	-	cl21454
Q#82 - >HORVU.MOREX.r3.3HG0248640.1.V3	non-specific	240662	62	306	2.08036e-39	146.527	cd12186	LDH	-	cl21454
Q#82 - >HORVU.MOREX.r3.3HG0248640.1.V3	non-specific	177941	76	334	1.23656e-38	146.156	PLN02306	PLN02306	N	cl21454
Q#82 - >HORVU.MOREX.r3.3HG0248640.1.V3	non-specific	180588	62	307	9.63095e-38	141.761	PRK06487	PRK06487	-	cl21454
Q#82 - >HORVU.MOREX.r3.3HG0248640.1.V3	non-specific	240661	47	300	6.46058e-37	139.651	cd12185	HGDH_LDH_like	-	cl21454
Q#82 - >HORVU.MOREX.r3.3HG0248640.1.V3	non-specific	240659	60	306	7.27321e-37	139.502	cd12183	LDH_like_2	-	cl21454
Q#82 - >HORVU.MOREX.r3.3HG0248640.1.V3	non-specific	215501	62	306	4.13201e-36	137.89	PLN02928	PLN02928	N	cl21454
Q#82 - >HORVU.MOREX.r3.3HG0248640.1.V3	non-specific	236985	63	291	5.50656e-35	136.461	PRK11790	PRK11790	C	cl21454
Q#82 - >HORVU.MOREX.r3.3HG0248640.1.V3	non-specific	240657	6	306	1.45649e-31	124.377	cd12180	2-Hacid_dh_15	-	cl21454
Q#82 - >HORVU.MOREX.r3.3HG0248640.1.V3	non-specific	240637	55	305	1.2222e-29	119.018	cd12160	2-Hacid_dh_3	-	cl21454
Q#82 - >HORVU.MOREX.r3.3HG0248640.1.V3	non-specific	240640	69	306	1.46407e-29	119.301	cd12163	2-Hacid_dh_5	-	cl21454
Q#82 - >HORVU.MOREX.r3.3HG0248640.1.V3	non-specific	240635	62	330	1.94741e-29	119.172	cd12158	ErythrP_dh	-	cl21454
Q#82 - >HORVU.MOREX.r3.3HG0248640.1.V3	non-specific	235890	65	285	6.0392e-28	114.126	PRK06932	PRK06932	-	cl21454
Q#82 - >HORVU.MOREX.r3.3HG0248640.1.V3	non-specific	240660	61	296	4.19518e-27	112	cd12184	HGDH_like	-	cl21454
Q#82 - >HORVU.MOREX.r3.3HG0248640.1.V3	non-specific	181041	66	295	9.74083e-27	112.074	PRK07574	PRK07574	N	cl30766
Q#82 - >HORVU.MOREX.r3.3HG0248640.1.V3	superfamily	181041	66	295	9.74083e-27	112.074	cl30766	PRK07574 superfamily	N	-
Q#82 - >HORVU.MOREX.r3.3HG0248640.1.V3	non-specific	240627	63	295	3.77461e-26	109.723	cd05302	FDH	N	cl21454
Q#82 - >HORVU.MOREX.r3.3HG0248640.1.V3	non-specific	235800	59	288	2.46423e-24	103.424	PRK06436	PRK06436	-	cl21454
Q#82 - >HORVU.MOREX.r3.3HG0248640.1.V3	non-specific	183550	67	268	3.76819e-22	97.6765	PRK12480	PRK12480	-	cl21454
Q#82 - >HORVU.MOREX.r3.3HG0248640.1.V3	non-specific	181499	75	291	1.87342e-19	89.8034	PRK08605	PRK08605	N	cl30768
Q#82 - >HORVU.MOREX.r3.3HG0248640.1.V3	superfamily	181499	75	291	1.87342e-19	89.8034	cl30768	PRK08605 superfamily	N	-
Q#82 - >HORVU.MOREX.r3.3HG0248640.1.V3	non-specific	178684	71	289	3.63766e-18	86.4419	PLN03139	PLN03139	N	cl30769
Q#82 - >HORVU.MOREX.r3.3HG0248640.1.V3	superfamily	178684	71	289	3.63766e-18	86.4419	cl30769	PLN03139 superfamily	N	-
Q#82 - >HORVU.MOREX.r3.3HG0248640.1.V3	non-specific	166874	75	285	3.20454e-14	74.3015	PRK00257	PRK00257	C	cl31555
Q#82 - >HORVU.MOREX.r3.3HG0248640.1.V3	superfamily	166874	75	285	3.20454e-14	74.3015	cl31555	PRK00257 superfamily	C	-
Q#82 - >HORVU.MOREX.r3.3HG0248640.1.V3	non-specific	185335	150	289	5.74854e-11	64.5429	PRK15438	PRK15438	NC	cl33147
Q#82 - >HORVU.MOREX.r3.3HG0248640.1.V3	superfamily	185335	150	289	5.74854e-11	64.5429	cl33147	PRK15438 superfamily	NC	-
Q#82 - >HORVU.MOREX.r3.3HG0248640.1.V3	non-specific	240647	85	307	8.18682e-11	63.0893	cd12170	2-Hacid_dh_9	N	cl21454
Q#82 - >HORVU.MOREX.r3.3HG0248640.1.V3	non-specific	240631	92	272	6.77663e-09	57.6251	cd12154	FDH_GDH_like	N	cl21454
Q#82 - >HORVU.MOREX.r3.3HG0248640.1.V3	specific	427176	448	527	0.00186919	38.0665	pfam03168	LEA_2	C	cl12118
Q#82 - >HORVU.MOREX.r3.3HG0248640.1.V3	superfamily	448410	448	527	0.00186919	38.0665	cl12118	LEA_2 superfamily	C	-
Q#83 - >HORVU.MOREX.r3.3HG0248140.1.V3	specific	427176	44	140	3.68759e-26	94.6909	pfam03168	LEA_2	-	cl12118
Q#83 - >HORVU.MOREX.r3.3HG0248140.1.V3	superfamily	448410	44	140	3.68759e-26	94.6909	cl12118	LEA_2 superfamily	-	-
Q#83 - >HORVU.MOREX.r3.3HG0248140.1.V3	specific	214812	25	124	8.0373e-23	86.1641	smart00769	WHy	-	cl12118
Q#83 - >HORVU.MOREX.r3.3HG0248140.1.V3	specific	444339	13	146	4.80936e-20	80.3866	COG5608	LEA	-	cl44268
Q#83 - >HORVU.MOREX.r3.3HG0248140.1.V3	superfamily	444339	13	146	4.80936e-20	80.3866	cl44268	LEA superfamily	-	-
Q#84 - >HORVU.MOREX.r3.3HG0287240.1.V3	non-specific	215609	17	246	6.95184e-52	168.001	PLN03160	PLN03160	-	cl12118
Q#84 - >HORVU.MOREX.r3.3HG0287240.1.V3	superfamily	448410	17	246	6.95184e-52	168.001	cl12118	LEA_2 superfamily	-	-
Q#84 - >HORVU.MOREX.r3.3HG0287240.1.V3	specific	427176	129	231	4.63958e-10	55.4005	pfam03168	LEA_2	-	cl12118
Q#85 - >HORVU.MOREX.r3.3HG0283230.1.V3	specific	425561	99	232	1.09863e-14	68.6979	pfam00257	Dehydrin	-	cl20205
Q#85 - >HORVU.MOREX.r3.3HG0283230.1.V3	superfamily	425561	99	232	1.09863e-14	68.6979	cl20205	Dehydrin superfamily	-	-
Q#86 - >HORVU.MOREX.r3.3HG0267250.1.V3	specific	427176	129	230	3.82825e-06	44.6149	pfam03168	LEA_2	-	cl12118
Q#86 - >HORVU.MOREX.r3.3HG0267250.1.V3	superfamily	448410	129	230	3.82825e-06	44.6149	cl12118	LEA_2 superfamily	-	-
Q#87 - >HORVU.MOREX.r3.3HG0273460.1.V3	specific	427176	74	170	3.41852e-26	95.8465	pfam03168	LEA_2	-	cl12118
Q#87 - >HORVU.MOREX.r3.3HG0273460.1.V3	superfamily	448410	74	170	3.41852e-26	95.8465	cl12118	LEA_2 superfamily	-	-
Q#87 - >HORVU.MOREX.r3.3HG0273460.1.V3	specific	214812	55	154	1.17196e-20	81.5417	smart00769	WHy	-	cl12118
Q#87 - >HORVU.MOREX.r3.3HG0273460.1.V3	specific	444339	51	176	2.08893e-18	76.9198	COG5608	LEA	-	cl44268
Q#87 - >HORVU.MOREX.r3.3HG0273460.1.V3	superfamily	444339	51	176	2.08893e-18	76.9198	cl44268	LEA superfamily	-	-
Q#87 - >HORVU.MOREX.r3.3HG0273460.1.V3	non-specific	465101	89	127	0.00127807	36.3952	pfam16353	LacZ_4	C	cl24805
Q#87 - >HORVU.MOREX.r3.3HG0273460.1.V3	superfamily	465101	89	127	0.00127807	36.3952	cl24805	LacZ_4 superfamily	C	-
Q#88 - >HORVU.MOREX.r3.3HG0257070.1.V3	non-specific	173412	85	405	5.88964e-10	61.6955	PTZ00121	PTZ00121	NC	cl31754
Q#88 - >HORVU.MOREX.r3.3HG0257070.1.V3	superfamily	173412	85	405	5.88964e-10	61.6955	cl31754	PTZ00121 superfamily	NC	-
Q#88 - >HORVU.MOREX.r3.3HG0257070.1.V3	non-specific	173412	96	417	8.29405e-07	51.6803	PTZ00121	PTZ00121	NC	cl31754
Q#88 - >HORVU.MOREX.r3.3HG0257070.1.V3	non-specific	173412	94	291	2.18768e-05	47.0579	PTZ00121	PTZ00121	NC	cl31754
Q#88 - >HORVU.MOREX.r3.3HG0257070.1.V3	non-specific	173412	94	291	4.75208e-05	45.9023	PTZ00121	PTZ00121	NC	cl31754
Q#88 - >HORVU.MOREX.r3.3HG0257070.1.V3	non-specific	173412	95	287	0.000188499	43.9763	PTZ00121	PTZ00121	NC	cl31754
Q#88 - >HORVU.MOREX.r3.3HG0257070.1.V3	specific	111833	131	174	0.000429404	37.6733	pfam02987	LEA_4	-	cl03821
Q#88 - >HORVU.MOREX.r3.3HG0257070.1.V3	superfamily	111833	131	174	0.000429404	37.6733	cl03821	LEA_4 superfamily	-	-
Q#88 - >HORVU.MOREX.r3.3HG0257070.1.V3	non-specific	235334	73	273	0.000830829	41.4719	PRK05035	PRK05035	N	cl47132
Q#88 - >HORVU.MOREX.r3.3HG0257070.1.V3	superfamily	481472	73	273	0.000830829	41.4719	cl47132	PRK05035 superfamily	N	-
Q#88 - >HORVU.MOREX.r3.3HG0257070.1.V3	non-specific	173412	88	288	0.0013513	41.2799	PTZ00121	PTZ00121	NC	cl31754
Q#88 - >HORVU.MOREX.r3.3HG0257070.1.V3	non-specific	111833	109	151	0.00375048	34.9769	pfam02987	LEA_4	-	cl03821
Q#88 - >HORVU.MOREX.r3.3HG0257070.1.V3	non-specific	111833	98	141	0.00748031	34.2065	pfam02987	LEA_4	-	cl03821
Q#89 - >HORVU.MOREX.r3.3HG0300120.1.V3	specific	427176	113	199	3.15708e-09	52.7041	pfam03168	LEA_2	-	cl12118
Q#89 - >HORVU.MOREX.r3.3HG0300120.1.V3	superfamily	448410	113	199	3.15708e-09	52.7041	cl12118	LEA_2 superfamily	-	-
Q#89 - >HORVU.MOREX.r3.3HG0300120.1.V3	non-specific	430890	106	149	0.00513472	36.8302	pfam09865	DUF2092	C	cl19192
Q#89 - >HORVU.MOREX.r3.3HG0300120.1.V3	superfamily	473147	106	149	0.00513472	36.8302	cl19192	LolA_fold-like superfamily	C	-
Q#91 - >HORVU.MOREX.r3.3HG0315640.1.V3	non-specific	215609	59	175	1.59581e-09	55.5223	PLN03160	PLN03160	N	cl12118
Q#91 - >HORVU.MOREX.r3.3HG0315640.1.V3	superfamily	448410	59	175	1.59581e-09	55.5223	cl12118	LEA_2 superfamily	N	-
Q#91 - >HORVU.MOREX.r3.3HG0315640.1.V3	specific	427176	80	172	0.000485469	38.0665	pfam03168	LEA_2	-	cl12118
Q#92 - >HORVU.MOREX.r3.3HG0233660.1.V3	specific	444339	46	172	2.28485e-23	93.0982	COG5608	LEA	-	cl44268
Q#92 - >HORVU.MOREX.r3.3HG0233660.1.V3	superfamily	444339	46	172	2.28485e-23	93.0982	cl44268	LEA superfamily	-	-
Q#92 - >HORVU.MOREX.r3.3HG0233660.1.V3	specific	444339	170	292	4.5301e-22	89.6314	COG5608	LEA	-	cl44268
Q#92 - >HORVU.MOREX.r3.3HG0233660.1.V3	superfamily	444339	170	292	4.5301e-22	89.6314	cl44268	LEA superfamily	-	-
Q#92 - >HORVU.MOREX.r3.3HG0233660.1.V3	specific	214812	52	151	5.73198e-22	88.0901	smart00769	WHy	-	cl12118
Q#92 - >HORVU.MOREX.r3.3HG0233660.1.V3	superfamily	448410	52	151	5.73198e-22	88.0901	cl12118	LEA_2 superfamily	-	-
Q#92 - >HORVU.MOREX.r3.3HG0233660.1.V3	specific	427176	197	292	4.6971e-18	77.7421	pfam03168	LEA_2	-	cl12118
Q#92 - >HORVU.MOREX.r3.3HG0233660.1.V3	superfamily	448410	197	292	4.6971e-18	77.7421	cl12118	LEA_2 superfamily	-	-
Q#92 - >HORVU.MOREX.r3.3HG0233660.1.V3	specific	427176	74	167	1.29756e-15	71.1937	pfam03168	LEA_2	-	cl12118
Q#92 - >HORVU.MOREX.r3.3HG0233660.1.V3	specific	214812	178	273	1.83558e-15	70.7561	smart00769	WHy	-	cl12118
Q#93 - >HORVU.MOREX.r3.3HG0296120.1.V3	specific	427176	158	263	4.05406e-07	47.3113	pfam03168	LEA_2	-	cl12118
Q#93 - >HORVU.MOREX.r3.3HG0296120.1.V3	superfamily	448410	158	263	4.05406e-07	47.3113	cl12118	LEA_2 superfamily	-	-

## Sheet: Sheet 4
Sheet 4. Conserved motif analyses of SNF1-related kinase (SnRK)
MOTIF ID ALT ID WIDTH BEST POSSIBLE MATCH
1 RRYFQQJISAVDYCHSRGVYHRDLKPENLLL MEME-1 31 RRYFQQIISVVDYCHSMGVYHRDLKPENFLL
2 YDGAEADVWSCGVILYVLLAGVLPFWDEN MEME-2 29 YYGPEADVWSCGVILYILLCGYPPFWDEN
3 GGLLHTTCGSPYYVAPEVLSR MEME-3 21 DGLFHTTCGTPYYVAPEVLSR
4 METKTKVYIVMELCAGGELFDRI MEME-4 23 METKTKIYIVMEYCEGGELFDRI
5 MLDPBPKTRJTAAZILEHPWF MEME-5 21 MLDPNPMTRITIHQILCHPWF
6 LLGRYELGRTLGQGQFGKVYLARDKATGZKVAIKSJDKRKL MEME-6 41 LMGRYELGRTLGQGQFGKTYLCRHKATGQKVACKSIDKRKV
7 KQFSAMNKLKKMALRVIAESLSEEEIAGLKEMFKMMDTDNSGTITLEELK MEME-7 50 KQFSAMNKFKKMALRVIAECLSEEEIAGLKEMFKMMDTDNSGTITYEELK
8 LMEAADVDGSGTIDYGEFIAATLHLNKLEREEHLYAAFQYFDKDGSGYIT MEME-8 50 LMEAADVDNNGTIDYGEFITATMHMNKMEREEHLYAAFQYFDKDGSGYIT
9 DEDGNLKVSDFGLSA MEME-9 15 DENGNLKVCDFGLSA
10 DVRREIAIMRHLRHP MEME-10 15 QVRREIQIMRHLRHH
PAIRWISE MOTIF CORRELATIONS:
MOTIF 1 2 3 4 5 6 7 8 9
----- ----- ----- ----- ----- ----- ----- ----- ----- -----
2 0.14
3 0.21 0.21
4 0.21 0.15 0.22
5 0.17 0.16 0.18 0.21
6 0.13 0.15 0.21 0.23 0.23
7 0.23 0.15 0.18 0.25 0.35 0.18
8 0.19 0.17 0.18 0.21 0.19 0.17 0.23
9 0.15 0.25 0.16 0.19 0.23 0.25 0.24 0.30
10 0.27 0.21 0.24 0.22 0.32 0.25 0.28 0.30 0.14
No overly similar pairs (correlation > 0.60) found.
Random model letter frequencies (from non-redundant database):
A 0.073 C 0.018 D 0.052 E 0.062 F 0.040 G 0.069 H 0.022 I 0.056 K 0.058
L 0.092 M 0.023 N 0.046 P 0.051 Q 0.041 R 0.052 S 0.074 T 0.059 V 0.064
W 0.013 Y 0.033
********************************************************************************
********************************************************************************
SECTION I: HIGH-SCORING SEQUENCES
********************************************************************************
- Each of the following 81 sequences has E-value less than 10.
- The E-value of a sequence is the expected number of sequences
in a random database of the same size that would match the motifs as
well as the sequence does and is equal to the combined p-value of the
sequence times the number of sequences in the database.
- The combined p-value of a sequence measures the strength of the
match of the sequence to all the motifs and is calculated by
o finding the score of the single best match of each motif
to the sequence (best matches may overlap),
o calculating the sequence p-value of each score,
o forming the product of the p-values,
o taking the p-value of the product.
- The sequence p-value of a score is defined as the
probability of a random sequence of the same length containing
some match with as good or better a score.
- The score for the match of a position in a sequence to a motif
is computed by by summing the appropriate entry from each column of
the position-dependent scoring matrix that represents the motif.
- Sequences shorter than one or more of the motifs are skipped.
- The table is sorted by increasing E-value.
********************************************************************************
SEQUENCE NAME DESCRIPTION E-VALUE LENGTH
------------- ----------- -------- ------
HORVU.MOREX.r3.5HG0450250.1.V3 2.5e-238 623
HORVU.MOREX.r3.2HG0196120.1.V3 7.6e-238 557
HORVU.MOREX.r3.6HG0604810.1.V3 3.3e-236 547
HORVU.MOREX.r3.5HG0517190.1.V3 4.4e-234 596
HORVU.MOREX.r3.5HG0517140.1.V3 2.6e-232 627
HORVU.MOREX.r3.4HG0356730.1.V3 3.2e-229 533
HORVU.MOREX.r3.3HG0295710.1.V3 6.6e-229 521
HORVU.MOREX.r3.1HG0069650.1.V3 9e-229 517
HORVU.MOREX.r3.2HG0151360.1.V3 2.8e-228 565
HORVU.MOREX.r3.4HG0349000.1.V3 1.9e-226 516
HORVU.MOREX.r3.6HG0633900.1.V3 7.3e-226 567
HORVU.MOREX.r3.5HG0462150.1.V3 4e-225 542
HORVU.MOREX.r3.5HG0451470.1.V3 5e-223 520
HORVU.MOREX.r3.1HG0092880.1.V3 2e-220 526
HORVU.MOREX.r3.3HG0273330.1.V3 2.2e-219 520
HORVU.MOREX.r3.5HG0523860.1.V3 4.9e-206 535
HORVU.MOREX.r3.2HG0133550.1.V3 6.6e-203 544
HORVU.MOREX.r3.4HG0410700.1.V3 3.2e-200 548
HORVU.MOREX.r3.3HG0303750.1.V3 4.5e-199 547
HORVU.MOREX.r3.1HG0072410.1.V3 7.5e-198 547
HORVU.MOREX.r3.2HG0188200.1.V3 2.8e-197 542
HORVU.MOREX.r3.5HG0449270.1.V3 5.2e-196 559
HORVU.MOREX.r3.7HG0686030.1.V3 8.5e-193 579
HORVU.MOREX.r3.5HG0495800.1.V3 6.5e-189 554
HORVU.MOREX.r3.6HG0565350.1.V3 4.7e-147 465
HORVU.MOREX.r3.2HG0153230.1.V3 6.1e-147 360
HORVU.MOREX.r3.2HG0112410.1.V3 1.7e-146 450
HORVU.MOREX.r3.3HG0246590.1.V3 2.2e-145 464
HORVU.MOREX.r3.4HG0356420.1.V3 3.7e-145 439
HORVU.MOREX.r3.3HG0297850.1.V3 4.9e-145 509
HORVU.MOREX.r3.4HG0380570.1.V3 1e-141 449
HORVU.MOREX.r3.6HG0551960.1.V3 5.6e-140 507
HORVU.MOREX.r3.2HG0110800.1.V3 1.7e-138 304
HORVU.MOREX.r3.4HG0352300.1.V3 1.4e-137 444
HORVU.MOREX.r3.5HG0464580.1.V3 3e-137 440
HORVU.MOREX.r3.1HG0077650.1.V3 1e-134 525
HORVU.MOREX.r3.3HG0290180.1.V3 1.4e-133 519
HORVU.MOREX.r3.5HG0483990.1.V3 3.7e-133 446
HORVU.MOREX.r3.1HG0071290.1.V3 5.6e-133 476
HORVU.MOREX.r3.3HG0290170.1.V3 1.7e-131 478
HORVU.MOREX.r3.4HG0410930.1.V3 2.6e-131 445
HORVU.MOREX.r3.7HG0720050.1.V3 1.4e-129 398
HORVU.MOREX.r3.4HG0350770.1.V3 2.4e-129 442
HORVU.MOREX.r3.1HG0017980.1.V3 2.9e-129 466
HORVU.MOREX.r3.4HG0385110.1.V3 2.1e-127 509
HORVU.MOREX.r3.3HG0286490.1.V3 3e-127 502
HORVU.MOREX.r3.2HG0108670.1.V3 3.3e-127 493
HORVU.MOREX.r3.1HG0017930.1.V3 7.1e-127 466
HORVU.MOREX.r3.3HG0242960.1.V3 7.5e-126 511
HORVU.MOREX.r3.1HG0082030.1.V3 2.9e-125 500
HORVU.MOREX.r3.5HG0438740.1.V3 6.6e-125 357
HORVU.MOREX.r3.2HG0121170.1.V3 5.7e-123 451
HORVU.MOREX.r3.3HG0264740.1.V3 1.4e-122 449
HORVU.MOREX.r3.4HG0342860.1.V3 2.6e-122 361
HORVU.MOREX.r3.3HG0320770.1.V3 6.7e-120 392
HORVU.MOREX.r3.5HG0512820.1.V3 2.5e-117 366
HORVU.MOREX.r3.3HG0320810.1.V3 3.3e-117 513
HORVU.MOREX.r3.2HG0124380.1.V3 1.4e-116 592
HORVU.MOREX.r3.1HG0057490.1.V3 2.2e-115 341
HORVU.MOREX.r3.1HG0075630.1.V3 7.1e-115 382
HORVU.MOREX.r3.6HG0569870.1.V3 8.4e-115 443
HORVU.MOREX.r3.2HG0119920.1.V3 1.5e-114 595
HORVU.MOREX.r3.5HG0509060.1.V3 3.7e-114 431
HORVU.MOREX.r3.7HG0719220.1.V3 2.5e-110 486
HORVU.MOREX.r3.6HG0565330.1.V3 1.7e-108 797
HORVU.MOREX.r3.2HG0112440.1.V3 2e-103 436
HORVU.MOREX.r3.5HG0433220.1.V3 1.8e-102 433
HORVU.MOREX.r3.5HG0484020.1.V3 4.3e-102 432
HORVU.MOREX.r3.2HG0123910.1.V3 5.1e-102 341
HORVU.MOREX.r3.7HG0642750.1.V3 6.3e-102 516
HORVU.MOREX.r3.7HG0721290.1.V3 2.8e-101 623
HORVU.MOREX.r3.2HG0201420.1.V3 2.4e-100 342
HORVU.MOREX.r3.1HG0049840.1.V3 4.3e-100 633
HORVU.MOREX.r3.2HG0216470.1.V3 4e-96 393
HORVU.MOREX.r3.2HG0208170.1.V3 3.6e-95 432
HORVU.MOREX.r3.3HG0299220.1.V3 4e-95 362
HORVU.MOREX.r3.5HG0487690.1.V3 6.9e-91 448
HORVU.MOREX.r3.5HG0479090.1.V3 1.4e-87 223
HORVU.MOREX.r3.1HG0060110.1.V3 7.4e-79 323
HORVU.MOREX.r3.3HG0320820.1.V3 5.2e-44 346
HORVU.MOREX.r3.3HG0320830.1.V3 2.3e-32 146
********************************************************************************
********************************************************************************
SECTION II: MOTIF DIAGRAMS
********************************************************************************
- The ordering and spacing of all non-overlapping motif occurrences
are shown for each high-scoring sequence listed in Section I.
- A motif occurrence is defined as a position in the sequence whose
match to the motif has POSITION p-value less than 0.0001.
- The POSITION p-value of a match is the probability of
a single random subsequence of the length of the motif
scoring at least as well as the observed match.
- For each sequence, all motif occurrences are shown unless there
are overlaps. In that case, a motif occurrence is shown only if its
p-value is less than the product of the p-values of the other
(lower-numbered) motif occurrences that it overlaps.
- The table also shows the E-value of each sequence.
- Spacers and motif occurences are indicated by
o -d- `d' residues separate the end of the preceding motif
occurrence and the start of the following motif occurrence
o [n] occurrence of motif `n' with p-value less than 0.0001.
********************************************************************************
SEQUENCE NAME E-VALUE MOTIF DIAGRAM
------------- -------- -------------
HORVU.MOREX.r3.5HG0450250.1.V3 2.5e-238 152-[6]-7-[10]-9-[4]-11-[1]-3-[9]-4-[3]-[2]-33-[5]-19-[7]-17-[8]-20-[8]-2
HORVU.MOREX.r3.2HG0196120.1.V3 7.6e-238 89-[6]-7-[10]-9-[4]-11-[1]-3-[9]-4-[3]-[2]-33-[5]-19-[7]-17-[8]-69
HORVU.MOREX.r3.6HG0604810.1.V3 3.3e-236 84-[6]-7-[10]-9-[4]-11-[1]-3-[9]-4-[3]-[2]-33-[5]-19-[7]-17-[8]-64
HORVU.MOREX.r3.5HG0517190.1.V3 4.4e-234 115-[6]-7-[10]-9-[4]-11-[1]-3-[9]-4-[3]-[2]-33-[5]-19-[7]-17-[8]-20-[8]-12
HORVU.MOREX.r3.5HG0517140.1.V3 2.6e-232 154-[6]-7-[10]-9-[4]-11-[1]-3-[9]-4-[3]-[2]-33-[5]-19-[7]-17-[8]-22-[8]-2
HORVU.MOREX.r3.4HG0356730.1.V3 3.2e-229 70-[6]-7-[10]-9-[4]-11-[1]-3-[9]-4-[3]-[2]-33-[5]-19-[7]-17-[8]-64
HORVU.MOREX.r3.3HG0295710.1.V3 6.6e-229 60-[6]-7-[10]-9-[4]-11-[1]-3-[9]-4-[3]-[2]-33-[5]-19-[7]-17-[8]-62
HORVU.MOREX.r3.1HG0069650.1.V3 9e-229 57-[6]-7-[10]-9-[4]-11-[1]-3-[9]-4-[3]-[2]-33-[5]-19-[7]-17-[8]-61
HORVU.MOREX.r3.2HG0151360.1.V3 2.8e-228 98-[6]-7-[10]-9-[4]-11-[1]-3-[9]-4-[3]-[2]-33-[5]-19-[7]-17-[8]-68
HORVU.MOREX.r3.4HG0349000.1.V3 1.9e-226 45-[6]-7-[10]-9-[4]-11-[1]-3-[9]-4-[3]-[2]-33-[5]-19-[7]-17-[8]-20-[8]-2
HORVU.MOREX.r3.6HG0633900.1.V3 7.3e-226 77-[6]-7-[10]-9-[4]-11-[1]-21-[9]-4-[3]-[2]-33-[5]-19-[7]-18-[8]-20-[8]-2
HORVU.MOREX.r3.5HG0462150.1.V3 4e-225 79-[6]-7-[10]-9-[4]-11-[1]-3-[9]-4-[3]-[2]-33-[5]-19-[7]-17-[8]-64
HORVU.MOREX.r3.5HG0451470.1.V3 5e-223 39-[6]-7-[10]-9-[4]-11-[1]-3-[9]-4-[3]-[2]-33-[5]-19-[7]-17-[8]-20-[8]-12
HORVU.MOREX.r3.1HG0092880.1.V3 2e-220 69-[6]-7-[10]-9-[4]-11-[1]-3-[9]-4-[3]-[2]-33-[5]-19-[7]-17-[8]-58
HORVU.MOREX.r3.3HG0273330.1.V3 2.2e-219 63-[6]-7-[10]-9-[4]-11-[1]-3-[9]-4-[3]-[2]-33-[5]-19-[7]-17-[8]-58
HORVU.MOREX.r3.5HG0523860.1.V3 4.9e-206 55-[6]-7-[10]-9-[4]-11-[1]-3-[9]-4-[3]-[2]-33-[5]-19-[7]-17-[8]-23-[8]-8
HORVU.MOREX.r3.2HG0133550.1.V3 6.6e-203 64-[6]-7-[10]-9-[4]-11-[1]-3-[9]-4-[3]-[2]-33-[5]-19-[7]-17-[8]-22-[8]-9
HORVU.MOREX.r3.4HG0410700.1.V3 3.2e-200 76-[6]-7-[10]-9-[4]-11-[1]-3-[9]-4-[3]-[2]-33-[5]-19-[7]-17-[8]-20-[8]-3
HORVU.MOREX.r3.3HG0303750.1.V3 4.5e-199 68-[6]-7-[10]-9-[4]-11-[1]-3-[9]-4-[3]-[2]-33-[5]-19-[7]-17-[8]-22-[8]-8
HORVU.MOREX.r3.1HG0072410.1.V3 7.5e-198 68-[6]-7-[10]-9-[4]-11-[1]-3-[9]-4-[3]-[2]-33-[5]-19-[7]-17-[8]-22-[8]-8
HORVU.MOREX.r3.2HG0188200.1.V3 2.8e-197 97-[6]-7-[10]-9-[4]-11-[1]-3-[9]-4-[3]-[2]-33-[5]-18-[7]-17-[8]-47
HORVU.MOREX.r3.5HG0449270.1.V3 5.2e-196 69-[6]-7-[10]-9-[4]-11-[1]-3-[9]-4-[3]-[2]-33-[5]-19-[7]-17-[8]-19-[8]-22
HORVU.MOREX.r3.7HG0686030.1.V3 8.5e-193 80-[6]-32-[10]-12-[4]-11-[1]-3-[9]-4-[3]-[2]-33-[5]-19-[7]-17-[8]-72
HORVU.MOREX.r3.5HG0495800.1.V3 6.5e-189 80-[6]-7-[10]-13-[4]-11-[1]-3-[9]-4-[3]-[2]-33-[5]-19-[7]-17-[8]-71
HORVU.MOREX.r3.6HG0565350.1.V3 4.7e-147 7-[6]-7-[10]-8-[4]-10-[1]-[9]-7-[3]-2-[2]-29-[5]-199
HORVU.MOREX.r3.2HG0153230.1.V3 6.1e-147 20-[6]-7-[10]-8-[4]-11-[1]-[9]-7-[3]-2-[2]-29-[5]-80
HORVU.MOREX.r3.2HG0112410.1.V3 1.7e-146 8-[6]-7-[10]-8-[4]-10-[1]-[9]-7-[3]-2-[2]-29-[5]-183
HORVU.MOREX.r3.3HG0246590.1.V3 2.2e-145 7-[6]-7-[10]-8-[4]-10-[1]-[9]-7-[3]-2-[2]-29-[5]-198
HORVU.MOREX.r3.4HG0356420.1.V3 3.7e-145 8-[6]-7-[10]-8-[4]-11-[1]-[9]-7-[3]-2-[2]-29-[5]-171
HORVU.MOREX.r3.3HG0297850.1.V3 4.9e-145 7-[6]-7-[10]-8-[4]-11-[1]-[9]-7-[3]-2-[2]-29-[5]-242
HORVU.MOREX.r3.4HG0380570.1.V3 1e-141 15-[6]-7-[10]-8-[4]-11-[1]-[9]-7-[3]-2-[2]-29-[5]-174
HORVU.MOREX.r3.6HG0551960.1.V3 5.6e-140 41-[6]-7-[10]-9-[4]-13-[1]-3-[9]-4-[3]-[2]-33-[5]-19-[7]-18-[8]-64
HORVU.MOREX.r3.2HG0110800.1.V3 1.7e-138 14-[6]-7-[10]-8-[4]-11-[1]-[9]-7-[3]-2-[2]-29-[5]-30
HORVU.MOREX.r3.4HG0352300.1.V3 1.4e-137 7-[6]-7-[10]-8-[4]-11-[1]-[9]-7-[3]-2-[2]-29-[5]-177
HORVU.MOREX.r3.5HG0464580.1.V3 3e-137 7-[6]-7-[10]-8-[4]-11-[1]-[9]-7-[3]-2-[2]-29-[5]-173
HORVU.MOREX.r3.1HG0077650.1.V3 1e-134 47-[6]-7-[10]-8-[4]-10-[1]-[9]-7-[3]-2-[2]-29-[5]-219
HORVU.MOREX.r3.3HG0290180.1.V3 1.4e-133 44-[6]-7-[10]-8-[4]-10-[1]-[9]-7-[3]-2-[2]-29-[5]-216
HORVU.MOREX.r3.5HG0483990.1.V3 3.7e-133 11-[6]-7-[10]-8-[4]-11-[1]-[9]-7-[3]-2-[2]-29-[5]-175
HORVU.MOREX.r3.1HG0071290.1.V3 5.6e-133 6-[6]-7-[10]-8-[4]-10-[1]-[9]-7-[3]-2-[2]-29-[5]-211
HORVU.MOREX.r3.3HG0290170.1.V3 1.7e-131 11-[6]-7-[10]-8-[4]-11-[1]-[9]-11-[3]-2-[2]-29-[5]-203
HORVU.MOREX.r3.4HG0410930.1.V3 2.6e-131 14-[6]-7-[10]-8-[4]-11-[1]-[9]-7-[3]-2-[2]-29-[5]-171
HORVU.MOREX.r3.7HG0720050.1.V3 1.4e-129 8-[6]-7-[10]-8-[4]-11-[1]-[9]-5-[3]-2-[2]-29-[5]-132
HORVU.MOREX.r3.4HG0350770.1.V3 2.4e-129 12-[6]-7-[10]-8-[4]-11-[1]-[9]-7-[3]-2-[2]-29-[5]-170
HORVU.MOREX.r3.1HG0017980.1.V3 2.9e-129 19-[6]-8-[10]-8-[4]-11-[1]-[9]-7-[3]-2-[2]-29-[5]-186
HORVU.MOREX.r3.4HG0385110.1.V3 2.1e-127 12-[6]-7-[10]-8-[4]-11-[1]-[9]-4-[3]-2-[2]-29-[5]-24-[10]-201
HORVU.MOREX.r3.3HG0286490.1.V3 3e-127 9-[6]-7-[10]-8-[4]-11-[1]-[9]-4-[3]-2-[2]-29-[5]-236
HORVU.MOREX.r3.2HG0108670.1.V3 3.3e-127 31-[6]-7-[10]-8-[4]-10-[1]-[9]-7-[3]-2-[2]-29-[5]-203
HORVU.MOREX.r3.1HG0017930.1.V3 7.1e-127 19-[6]-8-[10]-8-[4]-11-[1]-[9]-7-[3]-2-[2]-29-[5]-186
HORVU.MOREX.r3.3HG0242960.1.V3 7.5e-126 21-[6]-7-[10]-8-[4]-10-[1]-[9]-7-[3]-2-[2]-29-[5]-231
HORVU.MOREX.r3.1HG0082030.1.V3 2.9e-125 9-[6]-7-[10]-8-[4]-11-[1]-[9]-4-[3]-2-[2]-29-[5]-234
HORVU.MOREX.r3.5HG0438740.1.V3 6.6e-125 13-[6]-3-[10]-8-[4]-11-[1]-2-[9]-4-[3]-2-[2]-35-[5]-83
HORVU.MOREX.r3.2HG0121170.1.V3 5.7e-123 8-[6]-7-[10]-8-[4]-11-[1]-[9]-7-[3]-2-[2]-29-[5]-183
HORVU.MOREX.r3.3HG0264740.1.V3 1.4e-122 11-[6]-7-[10]-8-[4]-11-[1]-[9]-5-[3]-2-[2]-29-[5]-180
HORVU.MOREX.r3.4HG0342860.1.V3 2.6e-122 18-[6]-3-[10]-8-[4]-11-[1]-2-[9]-4-[3]-2-[2]-35-[5]-82
HORVU.MOREX.r3.3HG0320770.1.V3 6.7e-120 12-[6]-7-[10]-11-[4]-11-[1]-[9]-4-[3]-2-[2]-29-[5]-24-[10]-81
HORVU.MOREX.r3.5HG0512820.1.V3 2.5e-117 23-[6]-3-[10]-8-[4]-11-[1]-2-[9]-4-[3]-2-[2]-35-[5]-82
HORVU.MOREX.r3.3HG0320810.1.V3 3.3e-117 12-[6]-7-[10]-11-[4]-11-[1]-[9]-4-[3]-2-[2]-29-[5]-24-[10]-202
HORVU.MOREX.r3.2HG0124380.1.V3 1.4e-116 136-[6]-7-[10]-9-[4]-12-[1]-3-[9]-4-[3]-[2]-33-[5]-18-[7]-124
HORVU.MOREX.r3.1HG0057490.1.V3 2.2e-115 [6]-3-[10]-8-[4]-11-[1]-2-[9]-4-[3]-2-[2]-35-[5]-80
HORVU.MOREX.r3.1HG0075630.1.V3 7.1e-115 21-[6]-3-[10]-8-[4]-11-[1]-2-[9]-4-[3]-2-[2]-35-[5]-100
HORVU.MOREX.r3.6HG0569870.1.V3 8.4e-115 5-[6]-7-[10]-8-[4]-11-[1]-[9]-5-[3]-2-[2]-29-[5]-180
HORVU.MOREX.r3.2HG0119920.1.V3 1.5e-114 137-[6]-10-[10]-9-[4]-12-[1]-3-[9]-4-[3]-[2]-33-[5]-18-[7]-123
HORVU.MOREX.r3.5HG0509060.1.V3 3.7e-114 14-[6]-8-[10]-8-[4]-13-[1]-[9]-7-[3]-2-[2]-29-[5]-154
HORVU.MOREX.r3.7HG0719220.1.V3 2.5e-110 6-[6]-7-[10]-8-[4]-11-[1]-[9]-7-[3]-2-[2]-29-[5]-220
HORVU.MOREX.r3.6HG0565330.1.V3 1.7e-108 115-[4]-13-[1]-[9]-7-[3]-1-[2]-102-[6]-7-[10]-8-[4]-10-[1]-[9]-6-[3]-2-[2]-29-[5]-182
HORVU.MOREX.r3.2HG0112440.1.V3 2e-103 29-[6]-9-[10]-8-[4]-11-[1]-[9]-3-[3]-2-[2]-29-[5]-149
HORVU.MOREX.r3.5HG0433220.1.V3 1.8e-102 12-[6]-8-[10]-8-[4]-13-[1]-[9]-7-[3]-2-[2]-29-[5]-158
HORVU.MOREX.r3.5HG0484020.1.V3 4.3e-102 45-[10]-8-[4]-10-[1]-[9]-7-[3]-2-[2]-29-[5]-176
HORVU.MOREX.r3.2HG0123910.1.V3 5.1e-102 43-[10]-8-[4]-11-[1]-2-[9]-4-[3]-2-[2]-35-[5]-81
HORVU.MOREX.r3.7HG0642750.1.V3 6.3e-102 31-[6]-7-[10]-9-[4]-11-[1]-3-[9]-4-[3]-[2]-33-[5]-70-[2]-123
HORVU.MOREX.r3.7HG0721290.1.V3 2.8e-101 167-[6]-10-[10]-9-[4]-12-[1]-3-[9]-4-[3]-[2]-33-[5]-17-[7]-122
HORVU.MOREX.r3.2HG0201420.1.V3 2.4e-100 43-[10]-8-[4]-11-[1]-2-[9]-4-[3]-2-[2]-35-[5]-82
HORVU.MOREX.r3.1HG0049840.1.V3 4.3e-100 174-[6]-10-[10]-9-[4]-12-[1]-3-[9]-4-[3]-[2]-33-[5]-17-[7]-125
HORVU.MOREX.r3.2HG0216470.1.V3 4e-96 43-[10]-8-[4]-11-[1]-2-[9]-4-[3]-2-[2]-35-[5]-133
HORVU.MOREX.r3.2HG0208170.1.V3 3.6e-95 15-[6]-12-[10]-9-[4]-11-[1]-[9]-8-[3]-2-[2]-29-[5]-150
HORVU.MOREX.r3.3HG0299220.1.V3 4e-95 43-[10]-8-[4]-11-[1]-2-[9]-4-[3]-2-[2]-35-[5]-102
HORVU.MOREX.r3.5HG0487690.1.V3 6.9e-91 97-[6]-1-[10]-9-[4]-11-[1]-[9]-4-[3]-[2]-33-[5]-97
HORVU.MOREX.r3.5HG0479090.1.V3 1.4e-87 16-[4]-11-[1]-[9]-7-[3]-2-[2]-51-[10]-2
HORVU.MOREX.r3.1HG0060110.1.V3 7.4e-79 16-[6]-3-[10]-13-[4]-16-[1]-[9]-4-[3]-6-[2]-29-[5]-40
HORVU.MOREX.r3.3HG0320820.1.V3 5.2e-44 3-[3]-2-[2]-29-[5]-24-[10]-202
HORVU.MOREX.r3.3HG0320830.1.V3 2.3e-32 12-[6]-7-[10]-11-[4]-37
********************************************************************************
********************************************************************************
SECTION III: ANNOTATED SEQUENCES
********************************************************************************
- The positions and p-values of the non-overlapping motif occurrences
are shown above the actual sequence for each of the high-scoring
sequences from Section I.
- A motif occurrence is defined as a position in the sequence whose
match to the motif has POSITION p-value less than 0.0001 as
defined in Section II.
- For each sequence, the first line specifies the name of the sequence.
- The second (and possibly more) lines give a description of the
sequence.
- Following the description line(s) is a line giving the length,
combined p-value, and E-value of the sequence as defined in Section I.
- The next line reproduces the motif diagram from Section II.
- The entire sequence is printed on the following lines.
- Motif occurrences are indicated directly above their positions in the
sequence on lines showing
o the motif number of the occurrence,
o the position p-value of the occurrence,
o the best possible match to the motif, and
o columns whose match to the motif has a positive score (indicated
by a plus sign).
********************************************************************************
HORVU.MOREX.r3.5HG0450250.1.V3
LENGTH = 623 COMBINED P-VALUE = 3.03e-240 E-VALUE = 2.5e-238
DIAGRAM: 152-[6]-7-[10]-9-[4]-11-[1]-3-[9]-4-[3]-[2]-33-[5]-19-[7]-17-[8]-20-[8]-2
[6] [10] [
2.1e-33 8.3e-17 2
LMGRYELGRTLGQGQFGKTYLCRHKATGQKVACKSIDKRKV QVRREIQIMRHLRHH M
+++++ +++++++++++++++++++++ ++++++++++++ +++++++++++++++ +
151 DNLKDKYSLGRKLGQGQFGTTYLCVDKATALEYACKSIAKRKLITDEDVEDVRREIQIMHHLAGHPNIISIRGAY
4] [1] [9]
.5e-22 6.5e-27 5.9e-12
ETKTKIYIVMEYCEGGELFDRI RRYFQQIISVVDYCHSMGVYHRDLKPENFLL DENGNLKV
+++ ++++++++++++++++++ +++ + ++ +++ ++++++++++++++++++ +++ +++
226 EDAVAVHVVMELCAGGELFDRIVRRGHYTERQAAELARVIVAVVESCHSLGVMHRDLKPENFLFVGNEEDAALKT
[3] [2]
2.6e-19 5.3e-28
CDFGLSA DGLFHTTCGTPYYVAPEVLSRYYGPEADVWSCGVILYILLCGYPPFWDEN
+++++++ +++++++++++++++++++++++ +++++++++++ ++++++++++++++
301 IDFGLSMFFRPGEIFSDVVGSPYYVAPEVLKKNYSQEADVWSAGVIVYILLCGVPPFWAETEQGIFEQVLHGTLD
[5] [7]
1.4e-18 2.9e-59
MLDPNPMTRITIHQILCHPWF KQFSAMNKFKKMALRV
++++++++++++++++++++ ++++++++++++++++
376 FESDPWPSVSEGAKDLLRKVLVRDPKKRLTAHQVLCHPWLQMSGEAPDKPLDSAVLSRLKQFSAMNKLKKMALRV
[8]
2.3e-57
IAECLSEEEIAGLKEMFKMMDTDNSGTITYEELK LMEAADVDNNGTIDYGEFITATMH
++++++++++++++++++++++++++++++++++ ++++++++++++++++++++++++
451 IAENLSEEEIAGLKEMFKMMDTDNSGQINYEELKAGLERVGANMKECEISQLMQAADIDNSGTIDYGEFIAATLH
[8]
6.6e-06
MNKMEREEHLYAAFQYFDKDGSGYIT LMEAADVDNNGTIDYGEFITATMHMNKME
++++++++++++++++++++++++++ ++ ++ + +++ ++++ +
526 LNKVEREDHLYAAFQYFDKDGSGYITADELQQACDEFGIEDVRLDDMIGEVDQDNDGRIDYNEFVAMMHKSTAGF
REEHLYAAFQYFDKDGSGYIT
+ + +
601 GKKSHQYNLSVGLRDALNIKSNS
HORVU.MOREX.r3.2HG0196120.1.V3
LENGTH = 557 COMBINED P-VALUE = 9.42e-240 E-VALUE = 7.6e-238
DIAGRAM: 89-[6]-7-[10]-9-[4]-11-[1]-3-[9]-4-[3]-[2]-33-[5]-19-[7]-17-[8]-69
[6] [10]
6.9e-35 4.3e-17
LMGRYELGRTLGQGQFGKTYLCRHKATGQKVACKSIDKRKV QVRREIQIMRHLR
+++ + ++++++++++++++++++++++ ++++++++++++ +++++++++++++
76 PADLGSVLGHPTPNLRDLYALGRKLGQGQFGTTYLCTELATGADYACKSISKRKLITKEDIDDVRREIQIMHHLS
[4] [1]
1.0e-22 5.9e-28
HH METKTKIYIVMEYCEGGELFDRI RRYFQQIISVVDYCHSMGVYHRDLKPENFL
++ ++++ ++++++++++++++++++ +++++ ++++++ +++++++++++++++++
151 GHKNVVAIKGAYEDQLYVHIVMELCAGGELFDRIIQRGHYSERKAAELTRIIVGVVEACHSLGVMHRDLKPENFL
[9] [3] [2]
3.3e-12 1.8e-19 4.0e-28
L DENGNLKVCDFGLSA DGLFHTTCGTPYYVAPEVLSRYYGPEADVWSCGVILYILLCGYPPFWDEN
+ +++ ++++++++++ +++++++++++++++++++++ ++++++++ +++++++++++++++++++
226 LANKDDDLSLKAIDFGLSVFFKPGQIFTDVVGSPYYVAPEVLCKKYGPEADVWTAGVILYILLSGVPPFWAETQQ
[5] [7]
2.0e-19 1.0e
MLDPNPMTRITIHQILCHPWF KQFS
++++ ++++++++++++++++ ++++
301 GIFDAVLKGVIDFDSEPWPVISDSAKDLITRMLNPRPAERLTAHEVLCHPWIRDHGVAPDRPLDTAVLSRIKQFS
[8]
-55 2.5e-55
AMNKFKKMALRVIAECLSEEEIAGLKEMFKMMDTDNSGTITYEELK LMEAADVDNNGT
++++++++++++++++++++++++++++++++++++++++++++++ ++++++++++++
376 AMNKLKKMALRVIAESLSEEEIAGLKEMFQTMDADNSGAITYDELKEGLRKYGSTLKDTEIRDLMDAADVDNSGT
IDYGEFITATMHMNKMEREEHLYAAFQYFDKDGSGYIT
++++++++++++++++++++++++++++++++++++++
451 IDYIEFIAATLHLNKLEREEHLVAAFSYFDKDGSGYITVDELQQACLEHNMPDAFLDDVIKEADQDNDGRIDYGE
HORVU.MOREX.r3.6HG0604810.1.V3
LENGTH = 547 COMBINED P-VALUE = 4.04e-238 E-VALUE = 3.3e-236
DIAGRAM: 84-[6]-7-[10]-9-[4]-11-[1]-3-[9]-4-[3]-[2]-33-[5]-19-[7]-17-[8]-64
[6] [10]
5.4e-34 8.3e-17
LMGRYELGRTLGQGQFGKTYLCRHKATGQKVACKSIDKRKV QVRREIQIMRHLRHH
+ +++ ++++++++++++++++++++++ +++++++ ++++ +++++++++++++++
76 NVLGHPTPSLHDHYLLGRKLGQGQFGTTYLCTDRATGADYACKSIGKRKLITKEDVEDVRREIQIMHHLAGHRNV
[4] [1] [
5.2e-22 1.5e-26 2
METKTKIYIVMEYCEGGELFDRI RRYFQQIISVVDYCHSMGVYHRDLKPENFLL D
++++ +++++++++ ++++++++ +++++ +++++ ++++++++++++++++++ +
151 VAIKGAYEDPVYVHIVMELCGGGELFDRIIQRGHYSERKAAELTRIVVGVVEACHSLGVIHRDLKPENFLLANKD
9] [3] [2]
.2e-12 3.7e-19 2.0e-28
ENGNLKVCDFGLSA DGLFHTTCGTPYYVAPEVLSRYYGPEADVWSCGVILYILLCGYPPFWDEN
++ ++++++++++ +++++++++++++++++++ ++++++++++ +++++++++++++++++++
226 DDMSLKAIDFGLSVFFKPGQVFTDVVGSPYYVAPEVLRKRYGPEADVWTAGVILYILLSGVPPFWAETQQGIFDA
[5] [7]
1.2e-19 4.2e-56
MLDPNPMTRITIHQILCHPWF KQFSAMNKF
++++ ++++++++++++++++ +++++++++
301 VLKGVIDFDSDPWPVISDSAKDLIMRMLNPRPAERLTAHQVLCHPWISDHGVAPDRPLDPAVLSRIKQFSAMNKL
[8]
3.9e-56
KKMALRVIAECLSEEEIAGLKEMFKMMDTDNSGTITYEELK LMEAADVDNNGTIDYGE
+++++++++++++++++++++++++++++++++++++++++ +++++++++++++++++
376 KKMALRVIAESLSEEEIAGLKEMFEAMDTDNSGAITYDELKEGMRKYGSTLKDTEIRDLMEAADVDNSGTIDYIE
FITATMHMNKMEREEHLYAAFQYFDKDGSGYIT
+++++++++++++++++++++++++++++++++
451 FIAATLHLNKLEREEHLVAAFSYFDKDGSGYITVDELQQACKEHNMPDAFLDDVIIEADQDNDGRIDYGEFVAMM
HORVU.MOREX.r3.5HG0517190.1.V3
LENGTH = 596 COMBINED P-VALUE = 5.43e-236 E-VALUE = 4.4e-234
DIAGRAM: 115-[6]-7-[10]-9-[4]-11-[1]-3-[9]-4-[3]-[2]-33-[5]-19-[7]-17-[8]-20-[8]-12
[6]
4e-34
LMGRYELGRTLGQGQFGKTYLCRHKATGQKVACKS
+++ ++++++++++++++++++++++++ ++++++
76 PSRQQSMAPVAKKPVPKVKRVQSAGLLADSVLKRDVNTARLKDLYTIGKKLGQGQFGTTYLCVEKATGKEYACKS
[10] [4] [1]
8.3e-17 4.6e-21 1.6e
IDKRKV QVRREIQIMRHLRHH METKTKIYIVMEYCEGGELFDRI RRYF
++++++ +++++++++++++++ ++++ ++ +++++++++++++++ ++++
151 IAKRKLLTDEDVEDVRREIQIMHHLAGHSSVVSIVGAYEDAVAVQLVMELCAGGELFDRIIQRGHYSEKAAAQLT
[9] [3] [2]
-27 4.8e-13 1.1e-18 4.2e-
QQIISVVDYCHSMGVYHRDLKPENFLL DENGNLKVCDFGLSA DGLFHTTCGTPYYVAPEVLSRYYGPE
+ ++++++ ++++++++++++++++++ ++++++++++++++ ++ ++++++++++++++++ ++++ +
226 RVIVGVIEACHSLGVMHRDLKPENFLFINNQEDSPLKAIDFGLSIFFTPGQMFTDVVGSPYYVAPEVLLKNYGRE
[5]
27 1.6e-18
ADVWSCGVILYILLCGYPPFWDEN MLDPNPMTRITIHQILCH
+++++++++ ++++++++++++++ ++ +++++++++++++++
301 VDVWSAGVIIYILLSGVPPFWDESEQGIFEQVLKGELDFTTEPWPSISDSAKDLVRKMLIRDPKKRLTAHEALCH
[7]
4.9e-58
PWF KQFSAMNKFKKMALRVIAECLSEEEIAGLKEMFKMMDTDNSGTITYEELK
+++ ++++++++++++++++++++++++++++++++++++++++++++++++++
376 PWVCVDGVAPDKPLDSAVLSRLKQFSAMNKLKKMALRVIAESLSEEEIAGLKEMFKMLDTDNSGHITLEELKSGL
[8]
1.6e-54
LMEAADVDNNGTIDYGEFITATMHMNKMEREEHLYAAFQYFDKDGSGYIT
++++++++++++++++++++++++++++++++ +++++++++++++++++
451 RRVGATLMDSEIDALMEAADIDNSGTIDYGEFIAATMHMNKVDKEDKLFAAFQYFDKDGSGYITQDELQKACEEF
[8]
4.6e-06
LMEAADVDNNGTIDYGEFITATMHMNKMEREEHLYAAFQYFDKDGSGYIT
++ ++ + +++ +++ + + + ++ + +
526 GIGDTRIEDIIGDVDKDNDGKIDYNEFVEMMQKGNNPLGRKGQQSNVNFGLGDALKLRSNINHGKTKFLVN
HORVU.MOREX.r3.5HG0517140.1.V3
LENGTH = 627 COMBINED P-VALUE = 3.23e-234 E-VALUE = 2.6e-232
DIAGRAM: 154-[6]-7-[10]-9-[4]-11-[1]-3-[9]-4-[3]-[2]-33-[5]-19-[7]-17-[8]-22-[8]-2
[6] [10]
2.0e-30 8.5e-16
LMGRYELGRTLGQGQFGKTYLCRHKATGQKVACKSIDKRKV QVRREIQIMRHLRHH
+++++ +++ ++++++++++++++++++ +++++++ ++++ +++++++++++++++
151 KTESVKEKYSLGRRLGQGQFGTTYLCVERSSGKEYACKSILKRKLVTDDDVEDVRREIQIMYHLAGHPNVISIRG
[4] [1] [9]
7.5e-23 8.3e-28 1.0e-1
METKTKIYIVMEYCEGGELFDRI RRYFQQIISVVDYCHSMGVYHRDLKPENFLL DENGNL
++++ ++++++++++++++++++ +++ + ++++++ ++++++++++++++++++ + + +
226 AYEDAVAVHLVMELCAGGELFDRIVQKGHYTERKAAELARVIVGVVEVCHSMGVMHRDLKPENFLFVDQTEEAAL
[3] [2]
1 1.4e-19 6.9e-30
KVCDFGLSA DGLFHTTCGTPYYVAPEVLSRYYGPEADVWSCGVILYILLCGYPPFWDEN
+++++++++ +++++++++++++++++++++ +++++++++++++ ++++++++++++++
301 KTIDFGLSVFFRPGQIFTDVVGSPYYVAPEVLKKKYGPEADVWSAGVIIYILLCGVPPFWAENEQGIFEEVLHGK
[5] [7]
1.4e-17 1.4e-55
MLDPNPMTRITIHQILCHPWF KQFSAMNKFKKMAL
++ +++++++++++++ ++++ ++++++++++++++
376 LDFESDPWPSISEGAKDLVRRMLLRDPKKRLTAHEVLRHPWVQVGGLAPDKPLDSAVLSRMKQFSAMNKLKKMAL
[8]
1.2e-56
RVIAECLSEEEIAGLKEMFKMMDTDNSGTITYEELK LMEAADVDNNGTIDYGEFITAT
+++++++++ ++++++++++++++++++++++++++ ++++++++++++++++++++++
451 RVIAENLSEDEIAGLKEMFKMIDSDNSGQITYEELKVGLKKVGANLQESEIYALMQAADVDNSGTIDYGEFIAAT
[8]
6.3e-05
MHMNKMEREEHLYAAFQYFDKDGSGYIT LMEAADVDNNGTIDYGEFITATMHM
++++++++++++++++++++++++++++ ++ ++ + +++ ++++ +
526 LHLNKVEREDHLFAAFQYFDKDGSGYITPDELQLACEEFGLGGDDLSLDNMIREVDQDNDGRIDYNEFVAMMQKP
NKMEREEHLYAAFQYFDKDGSGYIT
+ +
601 ALGLAKKAGAGLESSFSIGFREALRMA
HORVU.MOREX.r3.4HG0356730.1.V3
LENGTH = 533 COMBINED P-VALUE = 4.00e-231 E-VALUE = 3.2e-229
DIAGRAM: 70-[6]-7-[10]-9-[4]-11-[1]-3-[9]-4-[3]-[2]-33-[5]-19-[7]-17-[8]-64
[6]
3.8e-
LMGRY
+++++
1 MGQCCSKGAGHAGDSNSEPAPLPPAAPKVEPVASSSTASNGVPVPPAANGKAGGKPPAPIGDVLGRAMEDVRHTY
[10] [4]
33 3.2e-14 1.7e-24
ELGRTLGQGQFGKTYLCRHKATGQKVACKSIDKRKV QVRREIQIMRHLRHH METKTKIY
+++++++++++++++++++++++++++++++++++ +++++++++++++++ ++++++++
76 SIGKELGRGQFGVTHLCTHRSTGEKLACKTIAKRKLANKEDVEDVRREVQIMYHLSGQPNIVDLRGAYEDKHNVH
[1] [9]
2.7e-26 2.6e-13
IVMEYCEGGELFDRI RRYFQQIISVVDYCHSMGVYHRDLKPENFLL DENGNLKVCDFGLSA
+++++++++++++++ + + + +++++++++ +++++++++++++++ ++++++++++++++
151 LVMELCAGGELFDRIIAKGHYTERAAAALLRAIVGIVHTCHCMGVMHRDLKPENFLLLSKGEDSPLKATDFGLSV
[3] [2]
3.2e-18 7.8e-28
DGLFHTTCGTPYYVAPEVLSRYYGPEADVWSCGVILYILLCGYPPFWDEN
++++ +++++++++++++++++++++++++++++++++ +++++++++++
226 FFKEGEVFRDIVGSAYYIAPEVLKRRYGPEADIWSIGVMLYIFLAGVPPFWAENENAIFTAVLRGQVDFNGDPWP
[5] [7]
1.0e-18 4.8e-53
MLDPNPMTRITIHQILCHPWF KQFSAMNKFKKMALRVIAECLSE
+++ ++++++++ ++++++++ +++++++++++++++++++++++
301 NISSGAKDLVKKMLNINPKERLTAFQVLNHPWIKEDGDAPDTPLDNVVLNRLKQFRAMNQFKKAALRVIAGCLSE
[8]
1.1e-54
EEIAGLKEMFKMMDTDNSGTITYEELK LMEAADVDNNGTIDYGEFITATMHMNKMERE
+++++++++++++++++++++++++++ +++++++++++ +++++++++++++++++++
376 EEIKGLKEMFKNIDKDNSGTITLEELKNGLAKQGTKLSDNEIEQLMEAADADGNGLIDYEEFVTATVHMNKMDRE
EHLYAAFQYFDKDGSGYIT
+++++++++++++++++++
451 EHLYTAFQFFDKDNSGYITRDELEQALKEKGMYDAKEIKEIISEADTDNDGRIDYSEFVAMMKKGAGSTEPTNPK
HORVU.MOREX.r3.3HG0295710.1.V3
LENGTH = 521 COMBINED P-VALUE = 8.19e-231 E-VALUE = 6.6e-229
DIAGRAM: 60-[6]-7-[10]-9-[4]-11-[1]-3-[9]-4-[3]-[2]-33-[5]-19-[7]-17-[8]-62
[6]
1.2e-32
LMGRYELGRTLGQGQ
++ +++++++++++
1 MGNCCAGSGDAEPVPASSGDPSTRRAGASIKAGGASPSSAPAQNKPPAAIGPVLGRPMEDVRSIYTVGKELGRGQ
[10] [4]
4.8e-14 1.2e-23
FGKTYLCRHKATGQKVACKSIDKRKV QVRREIQIMRHLRHH METKTKIYIVMEYCEGGE
++++ +++++++++++++++++++++ +++++++++++++++ ++++++++++++++++++
76 FGVTSLCTHKATGQKFACKTIAKRKLSTKEDVEDVRREVQIMYHLAGQPNIVELKGAYEDKQSVHLVMELCAGGE
[1] [9] [3]
3.7e-26 2.0e-13 8.5e-1
LFDRI RRYFQQIISVVDYCHSMGVYHRDLKPENFLL DENGNLKVCDFGLSA DGLFHT
+++++ + + +++++++++++++++++++++++++++ ++++++++++++++ ++++++
151 LFDRIITKGKYTERAAASLLRTIVEIIHTCHSLGVIHRDLKPENFLLLSKEEDAPLKATDFGLSVFFKQGEVFKD
[2]
9 5.9e-30
TCGTPYYVAPEVLSRYYGPEADVWSCGVILYILLCGYPPFWDEN
+++++++++++++++++++++++++ ++++++++++++++++++
226 IVGSAYYIAPEVLKRNYGPEADIWSVGVILYILLCGVPPFWAESEHGIFNSILRGQVDFTSDPWPRISPAAKDLV
[5] [7]
5.4e-16 5.6e-52
MLDPNPMTRITIHQILCHPWF KQFSAMNKFKKMALRVIAECLSEEEIAGLKEMF
+++ ++++++++ ++++ ++ +++++++++++++++++++++++++++++++++
301 RKMLNSDPKKRISAYDVLNHAWIKEDGEAPDTPLDNAVMNRLKQFKAMNQFKKAALRVIAGCLSEEEIRGLKEMF
[8]
6.4e-57
KMMDTDNSGTITYEELK LMEAADVDNNGTIDYGEFITATMHMNKMEREEHLYAAFQYF
+++++++++++++++++ +++++++++++++++++++++++++++++++++++++++++
376 KSMDSDNSGTITVDELRKGLGKQGTKLTEAEVEQLMEAADADGSGTIDYEEFITATMHMNRMDREEHLYTAFQYF
DKDGSGYIT
+++++++++
451 DKDNSGYISKEELEQALREKGLLEDGRDIKEIVSEVDADNDGRIDYSEFVAMMRKGAPEGANPKKRRDVVL
HORVU.MOREX.r3.1HG0069650.1.V3
LENGTH = 517 COMBINED P-VALUE = 1.11e-230 E-VALUE = 9e-229
DIAGRAM: 57-[6]-7-[10]-9-[4]-11-[1]-3-[9]-4-[3]-[2]-33-[5]-19-[7]-17-[8]-61
[6]
2.5e-30
LMGRYELGRTLGQGQFGK
++ ++++++++++++++
1 MGMCCRWFRKSHPAASGSSRPSDGSSGATSSALPSTAPQPVKPPAPIGPVLGRPMEDVKSIYNVGKELGRGQFGV
[10] [4]
4.8e-14 5.2e-24
TYLCRHKATGQKVACKSIDKRKV QVRREIQIMRHLRHH METKTKIYIVMEYCEGGELFD
+ +++ +++++++++++++++++ +++++++++++++++ +++++++++++++++++++++
76 TSLCTQKATGQKLACKTISKRKLSTKEDVEDVRREVQIMYHLAGQPGVVELKGAYEDKHAVHLVMELCAGGELFD
[1] [9] [3]
7.4e-26 7.9e-15 3.2e-18
RI RRYFQQIISVVDYCHSMGVYHRDLKPENFLL DENGNLKVCDFGLSA DGLFHTTCG
++ + + +++++++++++ +++++++++++++++ +++++++++++++++ ++++ ++++
151 RIIAKGHYTERAAASLVRTIMGIIHTCHTMGVIHRDLKPENFLLLSKDEDAPLKATDFGLSVFFKEGEVFRDIVG
[2] [
2.0e-27 1
TPYYVAPEVLSRYYGPEADVWSCGVILYILLCGYPPFWDEN M
++++++++++++++++ +++++ ++++++++++++++++++ +
226 SAYYIAPEVLKRNYGPQADIWSVGVMLYILLCGVPPFWAQSEHGIFNSILRGQVDFNSDPWPRISGGAKDLVRKM
5] [7]
.1e-17 7.5e-52
LDPNPMTRITIHQILCHPWF KQFSAMNKFKKMALRVIAECLSEEEIAGLKEMFKMM
+ +++++++++ +++++++ ++++++++++++++++++++++++++++++++++++
301 LTSDPKKRISAHDVLNHPWIKEDGEAPDTLIDNAVLGRLKQFRAMNQFKKAALRVIAGCLSEEEIRGLKEMFQSM
[8]
4.1e-59
DTDNSGTITYEELK LMEAADVDNNGTIDYGEFITATMHMNKMEREEHLYAAFQYFDKD
++++++++++++++ ++++++++++++++++++++++++++++++++++++++++++++
376 DSDNSGTITVDELRKGLAKKGTKLTEAEVQQLMEAADADGNGTIDYDEFITATMHMNRMDREEHLYTAFQYFDKD
GSGYIT
++++++
451 NSGYITIEELEQALREKGLMDGRDIKDIISEVDADHDGRINYTEFVAMMRKGAPEAANPKKRRDVVL
HORVU.MOREX.r3.2HG0151360.1.V3
LENGTH = 565 COMBINED P-VALUE = 3.41e-230 E-VALUE = 2.8e-228
DIAGRAM: 98-[6]-7-[10]-9-[4]-11-[1]-3-[9]-4-[3]-[2]-33-[5]-19-[7]-17-[8]-68
[6] [10]
1.2e-32 8.3e
LMGRYELGRTLGQGQFGKTYLCRHKATGQKVACKSIDKRKV QVRR
+++ ++++++++++++++++ +++++++ ++++++++++++ ++++
76 PKVKRVQSAGLLAESVLKRDSERIKDLYTLGKKLGQGQFGTTYKCVEKATGKEFACKSIAKRKLVTEEDVEDVRR
[4] [1]
-17 7.5e-23 3.1e-27
EIQIMRHLRHH METKTKIYIVMEYCEGGELFDRI RRYFQQIISVVDYCHSMGVYH
+++++++++++ ++++ ++++++++++++++++++ +++ + ++++++ ++++++++
151 EIQIMHHLAGHPNVISIVGAYEDAVAVHLVMELCAGGELFDRIIQRGHYSEKAAAQLARVIIGIVEACHSLGVMH
[9] [3] [2]
3.4e-13 3.9e-18 2.0e-26
RDLKPENFLL DENGNLKVCDFGLSA DGLFHTTCGTPYYVAPEVLSRYYGPEADVWSCGVILYILLCGY
++++++++++ +++++++++++++++ +++++++++++++++++++ + ++ ++++++++++ +++++++
226 RDLKPENFLFVNQKEDSPLKTIDFGLSIFFKPGGIYSDVVGSPYYVAPEVLLKQYGCEVDVWSAGVIIYILLSGV
[5]
1.4e-18
PPFWDEN MLDPNPMTRITIHQILCHPWF
+++++++ ++++++ ++++++++++++++
301 PPFWDESEQGIFEQVLKGDLDFSSEPWPSISKSAKDLVRKMLNRDPGKRLTAHEALCHPWVCVDGVAPDKPLDSA
[7] [8]
9.4e-55 1.2
KQFSAMNKFKKMALRVIAECLSEEEIAGLKEMFKMMDTDNSGTITYEELK LME
+++++++++++++++++++++++ ++++++++++++++++++++++++++ +++
376 VLTRLKQFSAMNKLKKMALRVIAENLSEDEIAGLREMFKMLDTDNSGQITLEELKTGLQRVGANLKESEIATLME
e-52
AADVDNNGTIDYGEFITATMHMNKMEREEHLYAAFQYFDKDGSGYIT
+++++++++++++++++++++++++++++++++++++++++++++++
451 AADIDNSGSIDYGEFLAATLHLNKVEREDNLFAAFSYFDKDGSGYITQDELQKACEEFGIGDAHLDDIIRDIDQD
HORVU.MOREX.r3.4HG0349000.1.V3
LENGTH = 516 COMBINED P-VALUE = 2.30e-228 E-VALUE = 1.9e-226
DIAGRAM: 45-[6]-7-[10]-9-[4]-11-[1]-3-[9]-4-[3]-[2]-33-[5]-19-[7]-17-[8]-20-[8]-2
[6]
3.8e-31
LMGRYELGRTLGQGQFGKTYLCRHKATGQK
+++++++++++++++++++++++ ++ + +
1 MQPDASGNAAGGGGANPRPKLPPPVAAAPAPSGRPASVLPHKTANVRDHYRIGKKLGQGQFGTTYLCVAKEDGGE
[10] [4]
1.0e-14 1.9e-22
VACKSIDKRKV QVRREIQIMRHLRHH METKTKIYIVMEYCEGGELFDRI
+++++++++++ +++++++++++++ + ++++ +++++++++++++++++
76 FACKSIPKRKLLCREDYEDVWREIQIMHHLSEHPNVVRIRGAYEDALFVHIVMELCAGGELFDRIVAKGHYTERA
[1] [9] [3]
2.3e-28 2.7e-12 1.3e-18
RRYFQQIISVVDYCHSMGVYHRDLKPENFLL DENGNLKVCDFGLSA DGLFHTTCGTPYYVAPEVLSR
++++++++++++ ++++++++++++++++++ ++++++++++++++ + +++++++++++++++++++
151 AAQLIRTIVGVVEACHSLGVMHRDLKPENFLFASTAEDAPLKTTDFGLSMFYKPGDKFSDVVGSPYYVAPEVLQK
[2] [5]
1.4e-31 3.1e-19
YYGPEADVWSCGVILYILLCGYPPFWDEN MLDPNPMTRITIH
+++++++++++++++++++++++++++++ +++++++++++++
226 CYGPEADVWSAGVILYILLCGVPPFWAETEAGIFRQILRGKLDFESEPWPSISDSAKDLVRTMLCRDPTKRLSAH
[7]
2.5e-50
QILCHPWF KQFSAMNKFKKMALRVIAECLSEEEIAGLKEMFKMMDTDNSGTITYEE
++++++++ ++++++++++++++++++++++++++ +++++++++++++++++++++
301 EVLCHPWIVDDAVAPDKPIDSAVLSRLKHFSAMNKLKKMALRVIAESLSEEEIGGLRELFKMIDADNSGTITFDE
[8]
2.5e-52
LK LMEAADVDNNGTIDYGEFITATMHMNKMEREEHLYAAFQYFDKDGSGYIT
++ ++++++++++++++++++++++++++++++++++++++++++++++++++
376 LKDGLKRVGSELTEHEIQALMDAADIDNSGTIDYGEFIAATLHMNKLEREENLVSAFSFFDKDGSGFITIDELSH
[8]
1.2e-05
LMEAADVDNNGTIDYGEFITATMHMNKMEREEHLYAAFQYFDKDGSGYIT
++ ++ + +++ ++ + + + + ++ +
451 ACREFGLDDVHLEDMIKDVDQNNDGQIDYSEFTAMMRKGNAGATGRRTMRNSLNLNLGDILNPSNS
HORVU.MOREX.r3.6HG0633900.1.V3
LENGTH = 567 COMBINED P-VALUE = 9.03e-228 E-VALUE = 7.3e-226
DIAGRAM: 77-[6]-7-[10]-9-[4]-11-[1]-21-[9]-4-[3]-[2]-33-[5]-19-[7]-18-[8]-20-[8]-2
[6] [10] [
3.6e-35 8.3e-17 1
LMGRYELGRTLGQGQFGKTYLCRHKATGQKVACKSIDKRKV QVRREIQIMRHLRHH M
+++ + ++++++++++++++++++++++ ++++++++++++ +++++++++++++++ +
76 PPLRDLYSLGRKLGQGQFGTTYLCTETATGTAFACKSIAKRKLLTPEDVEDVRREIQIMHHLAGHASVVTIKGAY
4] [1]
.2e-23 2.2e-27
ETKTKIYIVMEYCEGGELFDRI RRYFQQIISVVDYCHSMGVYHRDLKPENFLL
++++++++++++++++++++++ +++ + ++++++ ++++++++++++++++++
151 EDAQYVHIVMELCEGGELFDRIVQRGYFSERRAAEIARVIVGVVEACHSLGVMHRDLKPENFLLKDREGNGDSSN
[9] [3] [2]
2.0e-12 1.8e-19 5.3e-27
DENGNLKVCDFGLSA DGLFHTTCGTPYYVAPEVLSRYYGPEADVWSCGVILYILLCGYPPF
++ +++++++++++ ++++++++++++++++++++++++++++++ ++++ ++++++++++
226 GSAGNNEREPGEKINLKAIDFGLSVFFKPGQIFTDVVGSPYYVAPEVLCKHYGPEADVWTAGVIVYILLSGVPPF
[5]
4.3e-16
WDEN MLDPNPMTRITIHQILCHPWF
++++ ++ ++++ +++++++++++
301 WAETQQGIFDAVLKGAIDFDSDPWPTISDGAKDLIRKMLKSPPAERFTAHQVLCHPWIIENGEAPDAPLDPAVLS
[7] [8]
8.7e-49 4.4e-
KQFSAMNKFKKMALRVIAECLSEEEIAGLKEMFKMMDTDNSGTITYEELK LMEAA
+++++++++++++++++++ +++++++++++++++++++ ++++++++++ +++++
376 RLKQFSAMNRLKKMALRVIARGLSEEELAGLKEMFKTMDADGSGAITFEELREGLRRYGSTELGDSEVRDLMEAA
[8]
54 5.1e-06
DVDNNGTIDYGEFITATMHMNKMEREEHLYAAFQYFDKDGSGYIT LMEAADVDNN
+++ +++++++++++++++++++++++++++++++++++++++++ ++ ++
451 DVDRSGTIDYDEFIAATVHMNKLDREEHLMAAFSYFDKDGSGYITVDELEVACRDHNMADVGIDDIIREVDQDND
GTIDYGEFITATMHMNKMEREEHLYAAFQYFDKDGSGYIT
+ ++++++++ + + +
526 GRIDYGEFVAMMKKGIIGNGKLTMRHTSDGSVLHGAGSSVSS
HORVU.MOREX.r3.5HG0462150.1.V3
LENGTH = 542 COMBINED P-VALUE = 5.00e-227 E-VALUE = 4e-225
DIAGRAM: 79-[6]-7-[10]-9-[4]-11-[1]-3-[9]-4-[3]-[2]-33-[5]-19-[7]-17-[8]-64
[6] [10]
7.3e-34 6.3e-14
LMGRYELGRTLGQGQFGKTYLCRHKATGQKVACKSIDKRKV QVRREIQIMRHLRHH
++++++++ ++++++++++++++++++++++++++++++++ +++++++++++++++
76 PIEDVRATYTIGEELGRGQFGVTYLCTHTETGEKLACKTIAKRKLSGAEDVEDVRREVEIMHHLSGQPNIVDLRG
[4] [1] [9]
1.7e-24 7.0e-23 2.3e-1
METKTKIYIVMEYCEGGELFDRI RRYFQQIISVVDYCHSMGVYHRDLKPENFLL DENGNL
+++++++++++++++++++++++ + + + ++ +++ ++++++++++++++++ ++ +++
151 AYEDKHNVHLVMELCAGGELFDRIIAKGHYTERAAASLLRSVVGTVHTFHSMGVMHRDLKPENFLMLNRDESSPI
[3] [2]
3 8.5e-19 2.6e-26
KVCDFGLSA DGLFHTTCGTPYYVAPEVLSRYYGPEADVWSCGVILYILLCGYPPFWDEN
+++++++++ +++++++++++++++++++++ ++ +++++++++++++ +++++++++++
226 KATDFGLSVFFKEGEVFKDIVGSAYYIAPEVLKRKYGHEADVWSIGVMLYIFLSGVPPFWAENENAIFTAILRGE
[5] [7]
1.4e-17 1.8e-52
MLDPNPMTRITIHQILCHPWF KQFSAMNKFKKMAL
++ ++++++++ ++++++++ ++++++++++++++
301 VDFASDPWPNISAGAKDLVRKMLHINPKERLTAIQVLNHPWIKEDGEAPDTPLDNVVLDRMKQFVAMNQFKKAAL
[8]
3.3e-56
RVIAECLSEEEIAGLKEMFKMMDTDNSGTITYEELK LMEAADVDNNGTIDYGEFITAT
++++++++++++++++++++++++++++++++++++ +++++++++++ ++++++++++
376 RVIAGCLSEEEIKGLKEMFKSIDKDNSGTITLEELKTGLAKQGTKLSDHEIQQLMEAADADGNGLIDYEEFVTAT
MHMNKMEREEHLYAAFQYFDKDGSGYIT
++++++++++++++++++++++++++++
451 MHMNRMDREEHLYTAFQYFDKDNSGYITKEELEQALQEQKLYDPEEFKDVIADADSDNDGRIDYSEFVAMMRKGT
HORVU.MOREX.r3.5HG0451470.1.V3
LENGTH = 520 COMBINED P-VALUE = 6.12e-225 E-VALUE = 5e-223
DIAGRAM: 39-[6]-7-[10]-9-[4]-11-[1]-3-[9]-4-[3]-[2]-33-[5]-19-[7]-17-[8]-20-[8]-12
[6]
3.4e-31
LMGRYELGRTLGQGQFGKTYLCRHKATGQKVACKSI
+++++++++++++++++++++++ ++ + +++++++
1 MQPDPKGPGREKAHVRLPPPVTAPSVGRPASVLPHKTANVRDHYRIGKKLGQGQFGTTYLCVAKEDGGEYACKSI
[10] [4] [1]
1.0e-14 3.9e-22 1.2e-
DKRKV QVRREIQIMRHLRHH METKTKIYIVMEYCEGGELFDRI RRYFQ
+++++ +++++++++++++ + ++++ +++++++++++++++++ +++++
76 PKRKLLCREDYEDVWREIQIMHHLSEHPNVVRIRGAYEDALFVHLVMELCAGGELFDRIVAKGHYSERAAAQLIR
[9] [3] [2]
27 3.8e-13 9.7e-18 9.7e-3
QIISVVDYCHSMGVYHRDLKPENFLL DENGNLKVCDFGLSA DGLFHTTCGTPYYVAPEVLSRYYGPEA
+++++++ ++++++++++++++++++ ++++++++++++++ + ++ ++++++++++++++ +++++++
151 TIVGVVEGCHSLGVMHRDLKPENFLFASTAEDAPLKATDFGLSVFYKPGDKFADVVGSPYYVAPEVLLKCYGPEA
[5]
1 1.9e-18
DVWSCGVILYILLCGYPPFWDEN MLDPNPMTRITIHQILCHP
+++++++++++++++++++++++ ++ ++++++ +++++++++
226 DVWSAGVILYILLCGVPPFWAESETGIFKQILRGKLDLESEPWPSISDSAKDLVRKMLIRDPTKRQTAHEVLCHP
[7]
1.9e-53
WF KQFSAMNKFKKMALRVIAECLSEEEIAGLKEMFKMMDTDNSGTITYEELK
++ ++++++++++++++++++++++++++ +++++++++++++++++++++++
301 WIVDDSVAPDKPIDSAVLSRLKHFSAMNKLKKMALRVIAESLSEEEIGGLKELFKMIDTDNSGTITYEELRDGLK
[8]
2.5e-48
LMEAADVDNNGTIDYGEFITATMHMNKMEREEHLYAAFQYFDKDGSGYIT
++++++++++++++++++++++++++++++++++++++ +++++++++++
376 RVGSDLMEPEIQSLMDAADIDNSGSIDYGEFLAATLHVNKLEREENLVSAFAFFDKDGSGFITIDELSQACEKFG
[8]
1.7e-05
LMEAADVDNNGTIDYGEFITATMHMNKMEREEHLYAAFQYFDKDGSGYIT
++ ++ + +++ ++ + + + + + +
451 LSDVHLEDMIKDVDQNNDGQIDYSEFAAMMRKGNAGGSSGTSGTVGAGRRTMRNSLHVNLGEILRPGGTT
HORVU.MOREX.r3.1HG0092880.1.V3
LENGTH = 526 COMBINED P-VALUE = 2.49e-222 E-VALUE = 2e-220
DIAGRAM: 69-[6]-7-[10]-9-[4]-11-[1]-3-[9]-4-[3]-[2]-33-[5]-19-[7]-17-[8]-58
[6]
0.0038
LMGRYE
++++++
1 MGGRASRQRSDPPPPQAQQTPKQPNWPRPRHRRQPQPPPPQPPPPPQQPPPQPALPPDVGRVLGRPMEDVRATYT
[10] [4]
1 5.5e-14 6.0e-22
LGRTLGQGQFGKTYLCRHKATGQKVACKSIDKRKV QVRREIQIMRHLRHH METKTKIYI
+++++++++++++++++++++ ++++++++ +++ + +++++++++++++ +++++++ +
76 FGRELGRGQFGVTYLATHKSTGARYACKSIAARKLARADDVEDARREVQIMHHLTGHRSIVELRGAYEDRHSVNL
[1] [9]
1.0e-27 4.3e-13
VMEYCEGGELFDRI RRYFQQIISVVDYCHSMGVYHRDLKPENFLL DENGNLKVCDFGLSA
++++++++++++++ + +++ +++++ ++++++++++++++++++ ++++++++++++++
151 VMELCEGGELFDRIIARGHYSERAAATLCREVVSVVHSCHSMGVMHRDLKPENFLFLNKREDSPLKATDFGLSVF
[3] [2]
3.9e-18 4.3e-30
DGLFHTTCGTPYYVAPEVLSRYYGPEADVWSCGVILYILLCGYPPFWDEN
++++ + +++++++++++++++++++++++++++++++++++++++++++
226 FKPGEQFRDLVGSAYYVAPEVLKRRYGAEADIWSAGVILYILLSGVPPFWAENEEGIFDAVLKGHIDFSSDPWPS
[5] [7]
1.2e-18 4.7e-48
MLDPNPMTRITIHQILCHPWF KQFSAMNKFKKMALRVIAECLSEE
++ ++++++++++++++++++ ++++++++++++++++++++++++
301 ISNGAKDLVKRMLRQDPKERLTAAEILNHPWIREDGEAPDKPLDITVISRMKQFRAMNKLKKVALKIVAESLSEE
[8]
3.7e-52
EIAGLKEMFKMMDTDNSGTITYEELK LMEAADVDNNGTIDYGEFITATMHMNKMEREE
++ +++++++++++++++++++++++ +++++++++++++++ ++++++++++++++++
376 EIVGLREMFKSLDTDNSGTITLDELRAGLPKLGTKITESEIRQLMEAADVDGNGTIDYVEFISATMHMNRLEKED
HLYAAFQYFDKDGSGYIT
++++++++++++++++++
451 HIFKAFEYFDKDHSGYITVDELEEALKKYDMGDEATIKDIIAEVDTDHDGKINYQEFVAMMKNNSPEIVPNRRRL
HORVU.MOREX.r3.3HG0273330.1.V3
LENGTH = 520 COMBINED P-VALUE = 2.66e-221 E-VALUE = 2.2e-219
DIAGRAM: 63-[6]-7-[10]-9-[4]-11-[1]-3-[9]-4-[3]-[2]-33-[5]-19-[7]-17-[8]-58
[6]
1.2e-31
LMGRYELGRTLG
++++++ +++++
1 MGNRTSRHRRAAADQPAAAPPPTAQPKPQPQPKPKPQTAPAPAPTPEAGQVAMGRVLGRPMEDVRATYTFGRELG
[10] [4]
4.6e-15 1.4e-20
QGQFGKTYLCRHKATGQKVACKSIDKRKV QVRREIQIMRHLRHH METKTKIYIVMEYCE
+++++++++ +++++++++++++++ +++ +++++++++++++++ +++++++ +++++++
76 RGQFGVTYLVTHKATGQRFACKSIATRKLVHRDDIEDVQREVQIMHHLTGHRNIVELRGAYEDRHSVNLIMELCE
[1] [9] [3]
6.5e-27 4.5e-14 1.1
GGELFDRI RRYFQQIISVVDYCHSMGVYHRDLKPENFLL DENGNLKVCDFGLSA DGL
++++++++ + +++ ++++++ ++++++++++++++++++ +++++++++++++++ +++
151 GGELFDRIIARGHYSERAAALLCREMVSVVHSCHSMGVFHRDLKPENFLFLNNKEDSPLKATDFGLSVFFKHGEQ
[2]
e-18 2.3e-28
FHTTCGTPYYVAPEVLSRYYGPEADVWSCGVILYILLCGYPPFWDEN
+++ ++++++++++++++++++++++++++ ++++++++++++++++
226 FKDLVGSAYYVAPEVLKRHYGAEADIWSAGIILYILLSGVPPFWADNEDGIFEAVLLGHIDFSSDPWPSISNGAK
[5] [7]
1.2e-18 5.3e-49
MLDPNPMTRITIHQILCHPWF KQFSAMNKFKKMALRVIAECLSEEEIAGLK
++ ++++++++++++++++++ ++++++++++++++++++++++++++++++
301 DLVKKMLRQDPKERLTAAEILNHPWIREDGEAPDKPLDITVISRMKQFRAMNKLKKVALKIVAENLSEEEITGLK
[8]
6.6e-51
EMFKMMDTDNSGTITYEELK LMEAADVDNNGTIDYGEFITATMHMNKMEREEHLYAAF
+++ ++++++++++++++++ +++++++++++++++ ++++++++++++++++++ +++
376 EMFRSLDTDNSGTITLEELRSGLPKLGTKISESEITQLMEAADVDGNGTIDYSEFVSATMHMNRLEKEDHILKAF
QYFDKDGSGYIT
++++++++++++
451 EYFDKDHSGYITVDELEEALKKYDMGDDKTIKDIIAEVDTDHDGRINYQEFVAMMRNNSPEIVPNRRRMF
HORVU.MOREX.r3.5HG0523860.1.V3
LENGTH = 535 COMBINED P-VALUE = 6.05e-208 E-VALUE = 4.9e-206
DIAGRAM: 55-[6]-7-[10]-9-[4]-11-[1]-3-[9]-4-[3]-[2]-33-[5]-19-[7]-17-[8]-23-[8]-8
[6]
7.3e-31
LMGRYELGRTLGQGQFGKTY
+ +++ ++ +++++++++++
1 MGNCCGAPSTQGGGERKNNRRKAKANPYTVAYNRGAAGPPARAGLVVLRDPTGRDLDDKYVLGGELGRGEFGVTY
[10] [4]
2.0e-12 5.5e-20
LCRHKATGQKVACKSIDKRKV QVRREIQIMRHLRHH METKTKIYIVMEYCEGGELFDRI
++++++++ + ++++++++++ +++++++++++++ + +++ +++++ +++++++++++++
76 LCTEAATGARMACKSISKRKLRTPVDVEDVRREVEIMRHMPPHPNIVSLSAAYEDEDAVHLLMELCEGGELFDRI
[1] [9] [3]
7.2e-27 1.8e-13 3.7e-19
RRYFQQIISVVDYCHSMGVYHRDLKPENFLL DENGNLKVCDFGLSA DGLFHTTCGTP
+ ++++++++++++++++++++++++++++ ++ ++++++++++++ +++++++++++
151 VARGHYTERAAAAVTRTIVEVVQMCHRNGVIHRDLKPENFLYANKKESSPLKAIDFGLSVFFRPGERFSEIVGSP
[2] [5]
8.2e-31 4.5
YYVAPEVLSRYYGPEADVWSCGVILYILLCGYPPFWDEN MLD
+++++++++++++++++++++++++++++++++++++++ +++
226 YYMAPEVLKRNYGPEIDVWSAGVILYILLCGVPPFWAETEQGVAQAIIRSVVDFKRDPWPRVSEPAKDLVRRMLD
[7]
e-21 1.3e-42
PNPMTRITIHQILCHPWF KQFSAMNKFKKMALRVIAECLSEEEIAGLKEMFKMMDT
+++ ++++++++++++++ ++++++++++++++++++++++ +++++++ +++++++
301 PNPITRLTAAQVLEHPWLHDSKKNPDIQLGDTVRARLQQFSAMNKLKKKALRVIAEHLSLEEVADIKKMFDNMDI
[8]
3.7e-43
DNSGTITYEELK LMEAADVDNNGTIDYGEFITATMHMNKMEREEHLYAAFQYFDKDGS
++ +++++++ + ++++++++++++++++++++++ ++ ++++++++ +++++++ + +
376 NNKGQLTFDEFKAGLRKLGNKMHDSDLQMLMDAADVDKNGTLDYGEFVAVSIHVRKIGNDEHIQKAFSYFDQDKS
[8]
1.2e-05
GYIT LMEAADVDNNGTIDYGEFITATMHMNKMEREEHLYAAFQYFDKDGSGY
++++ +++++ + + ++++ + + + ++ +
451 GYIEIEELRVALTDEVDGPCDEDIINGIIHDVDTDKDGKISYDEFAAMMKAGTDWRKASRQYSRQRFSNLSLKLH
IT
526 KDGSISDDQK
HORVU.MOREX.r3.2HG0133550.1.V3
LENGTH = 544 COMBINED P-VALUE = 8.18e-205 E-VALUE = 6.6e-203
DIAGRAM: 64-[6]-7-[10]-9-[4]-11-[1]-3-[9]-4-[3]-[2]-33-[5]-19-[7]-17-[8]-22-[8]-9
[6]
3.2e-30
LMGRYELGRTL
+ ++++++ ++
1 MGNCCATPPAVDGGGAGKQQQQHKEPKQRKGKKPNPFSIEYNRSAPPGASRLVVLRDPTGTGRDIAERYELGGEL
[10] [4]
4.1e-13 2.2e-22
GQGQFGKTYLCRHKATGQKVACKSIDKRKV QVRREIQIMRHLRHH METKTKIYIVMEYC
++++++++++++++++ ++++++++++ ++ +++++++++++++ + +++ +++++++++
76 GRGEFGVTYLCTDRDTREALACKSISKKKLRTAVDIEDVRREVEIMRHLPKHPNIVTLRDTYEDDNAVHLVMELC
[1] [9] [3
2.5e-26 1.2e-12 2.
EGGELFDRI RRYFQQIISVVDYCHSMGVYHRDLKPENFLL DENGNLKVCDFGLSA DG
+++++++++ + ++ ++++++++++ +++++++++++++++ ++++ ++++++++++ ++
151 EGGELFDRIVARGHYTERAAAVVTKTIVEVVQMCHKHGVMHRDLKPENFLFANKKETAALKAIDFGLSVFFTPGE
] [2]
9e-19 1.6e-30
LFHTTCGTPYYVAPEVLSRYYGPEADVWSCGVILYILLCGYPPFWDEN
++++++++++++++++++++++++++++++++++++++++++++++++
226 RFTEIVGSPYYMAPEVLKRNYGQEVDVWSAGVILYILLCGVPPFWAETEQGVAQAIIRSVIDFKRDPWPRVSDNA
[5] [7]
9.0e-19 2.2e-41
MLDPNPMTRITIHQILCHPWF KQFSAMNKFKKMALRVIAECLSEEEIAGL
++++++++++++++++ ++++ ++++ ++++++++++++++++++++++++
301 KDLVRGMLNPDPRRRLTAQQVLDHPWLQNIKKAPNVNLGETVKARLQQFSVMNKFKKHALRVIAEHLSVEEVAGI
[8]
1.1e-42
KEMFKMMDTDNSGTITYEELK LMEAADVDNNGTIDYGEFITATMHMNKMEREEHLYAA
+++++ ++ +++ ++++++++ ++++++++++++++++++++ ++++++++++++++++
376 KDMFEKMDLNKDSMINFDELKLGLNKLGHQMPDADVQILMDAADADGNGCLDYGEFVTLSVHLKKIGNDEHLHKA
[8]
3.1e-05
FQYFDKDGSGYIT LMEAADVDNNGTIDYGEFITATMHMNKMEREEHLYAAFQY
+ +++ + +++++ +++++ + + +++++ + + ++ +
451 FGYFDRNKSGYIEIDELRESLADDLGPNHEEVINAIIRDVDTDKDGKISFEEFVAMMKAGTDWRKASRQYSRERF
FDKDGSGYIT
526 TSLSLKLQKDGSLQITSTQ
HORVU.MOREX.r3.4HG0410700.1.V3
LENGTH = 548 COMBINED P-VALUE = 3.98e-202 E-VALUE = 3.2e-200
DIAGRAM: 76-[6]-7-[10]-9-[4]-11-[1]-3-[9]-4-[3]-[2]-33-[5]-19-[7]-17-[8]-20-[8]-3
[6] [10] [4
4.1e-32 4.3e-17 3.
LMGRYELGRTLGQGQFGKTYLCRHKATGQKVACKSIDKRKV QVRREIQIMRHLRHH ME
+++++ ++++++++++++++++++++++ +++++++ ++++ +++++++++++++++ ++
76 DLREHYILGRKLGQGQFGTTYLCTEISTGCDFACKTILKRKLITRVDVEDVRREIQIMHHLSGHKNVVSIKDVYE
] [1] [9]
8e-19 8.9e-27 1.5e-11
TKTKIYIVMEYCEGGELFDRI RRYFQQIISVVDYCHSMGVYHRDLKPENFLL DENGNLKVC
+ +++++++++ ++++++++ +++++ ++++++++++++++++++++++++ +++ ++++
151 DVQAVHIVMELLPGGELFDRIQGNGRYSEMKAAEITRIVVSIVAMCHSLGVMHRDLKPENFLLLDKDDDLSIKAI
[3] [2]
2.3e-17 1.5e-28
DFGLSA DGLFHTTCGTPYYVAPEVLSRYYGPEADVWSCGVILYILLCGYPPFWDEN
++++++ ++++++ ++++ ++++++++++++++++++++++++++++++++++++++
226 DFGLSVYFKPGQVFSELVGSPFYVAPEVLHKRYGPESDVWSAGVILYVLLSGVPPFWADTQKGIFDAVLKGHLDL
[5] [7]
2.7e-16 1.3e-39
MLDPNPMTRITIHQILCHPWF KQFSAMNKFKKMALRVI
++++++++++ +++++ ++++ + +++++++ + +++++
301 ESDPWPKISDSAKDLIRKMLCNCPSERLKAHEVLRHPWICENGPATDGVLDPSVISRLKRFSAMNNLQKLALRVI
[8]
4.3e-46
AECLSEEEIAGLKEMFKMMDTDNSGTITYEELK LMEAADVDNNGTIDYGEFITATMHM
++ +++++++++++++++ ++ +++ +++ +++ ++++++++ ++ +++++++++ +
376 AERLSEEEIAGLRELFKTVDIKNSGVITFGELRKGLTRYGNGLVDTEICDIMEAADTDTDVTINYEEFIAATMPL
[8]
2.9e-05
NKMEREEHLYAAFQYFDKDGSGYIT LMEAADVDNNGTIDYGEFITATMHMNKMER
+++++++++ +++++++++++++++ ++ ++ + +++ ++++ + ++
451 NKIEREEHLKAAFTYFDKDGSGYITVDKLQLACAEYNMEGTLLEEIISEADQNNDGQIDYAEFVAMMQGNANGGN
EEHLYAAFQYFDKDGSGYIT
+
526 IGLGRPTMETSLNVTLRDAAQVH
HORVU.MOREX.r3.3HG0303750.1.V3
LENGTH = 547 COMBINED P-VALUE = 5.53e-201 E-VALUE = 4.5e-199
DIAGRAM: 68-[6]-7-[10]-9-[4]-11-[1]-3-[9]-4-[3]-[2]-33-[5]-19-[7]-17-[8]-22-[8]-8
[6]
2.7e-29
LMGRYEL
+ +++ +
1 MGNCCRSPAAAAREDVKSSHFPASAAAKKKKNKPHQPRSGAAGGNGGGGGGQKRLAVLGEEGCDFIGGIDDKYLL
[10] [4]
2.8e-12 1.6e-21
GRTLGQGQFGKTYLCRHKATGQKVACKSIDKRKV QVRREIQIMRHLRHH METKTKIYIV
+++++++++++++++++++ + +++++++++++ +++++++++++++ +++ +++++
76 DRELGRGEFGVTYLCVDRDTREQLACKSISKRKLRTPVDVEDVRREVAIMRHLPRSHSIVALREACEDEGAVHLV
[1] [9]
6.5e-27 1.1e-13
MEYCEGGELFDRI RRYFQQIISVVDYCHSMGVYHRDLKPENFLL DENGNLKVCDFGLSA
+++++++++++++ + ++++++++++ ++++++++++++++++++ +++++++++++++++
151 MELCEGGELFDRIVARGHYTERAAANVTRTIVEVVQLCHRHGVIHRDLKPENFLFANKKENSPLKAIDFGLSIFF
[3] [2]
6.8e-19 1.2e-30
DGLFHTTCGTPYYVAPEVLSRYYGPEADVWSCGVILYILLCGYPPFWDEN
++++++++++++++++++++++++++++++++++++++++++++++++++
226 KPGEKFSEIVGSPYYMAPEVLKRNYGPEIDIWSAGVILYILLCGVPPFWAETEQGVAQAILRGNIDFKREPWPNV
[5] [7]
2.7e-16 7.3e-44
MLDPNPMTRITIHQILCHPWF KQFSAMNKFKKMALRVIAECLSEEE
++ ++++ ++++ +++++ ++ ++++ +++++ ++++++++++++++
301 SENAKDLVRRMLEPDPKLRLTAKQVLEHHWLQNAKKAPNVPLGDIVKSRLKQFSRMNRFKRRALRVIADHLSAEE
[8]
5.3e-40
IAGLKEMFKMMDTDNSGTITYEELK LMEAADVDNNGTIDYGEFITATMHMNKMEREEH
+++++++++++++++++++++++++ + +++++++ + +++ +++++++++++++++++
376 VEDIKEMFKAMDTDNDGIVSCEELKSGIAKFGSHLAESEVQMLIEAVDTNGKGVLDYAEFLAVSLHLQRMANDEH
[8]
1e-06
LYAAFQYFDKDGSGYIT LMEAADVDNNGTIDYGEFITATMHMNKMEREEHLYA
+ +++ +++++++++++ + +++++ + + ++++++ + + ++
451 LRRAFLFFDKDGNGYIEPDELREALKDDGAADSMEVVNDILQEVDTDKDGKISYDEFVAMMKTGTDWRKASRHYS
AFQYFDKDGSGYIT
+ +
526 RGRFNSLSMKLVKDGSVKLGVE
HORVU.MOREX.r3.1HG0072410.1.V3
LENGTH = 547 COMBINED P-VALUE = 9.30e-200 E-VALUE = 7.5e-198
DIAGRAM: 68-[6]-7-[10]-9-[4]-11-[1]-3-[9]-4-[3]-[2]-33-[5]-19-[7]-17-[8]-22-[8]-8
[6]
1.5e-27
LMGRYEL
+ +++ +
1 MGNCCRSPAAAAREDVSSSHFPASAGKKKPHQARNGGGAGGGGGGAGAAGEKKRLSVLGEEGRDVGGGIDDKYAL
[10] [4]
2.8e-12 9.2e-22
GRTLGQGQFGKTYLCRHKATGQKVACKSIDKRKV QVRREIQIMRHLRHH METKTKIYIV
+++++++++++++++++ + + +++++++++++ +++++++++++++ +++ +++++
76 DRELGRGEFGVTYLCMDRGSKELLACKSISKRKLRTPVDVEDVRREVAIMRHLPRSASIVTLREACEDDGAVHLV
[1] [9]
7.2e-27 1.1e-13
MEYCEGGELFDRI RRYFQQIISVVDYCHSMGVYHRDLKPENFLL DENGNLKVCDFGLSA
+++++++++++++ + ++++++++++ ++++++++++++++++++ +++++++++++++++
151 MELCEGGELFDRIVARGHYTERAAAAVTRTIVEVVQLCHHHGVIHRDLKPENFLFANKKENSPLKAIDFGLSIFF
[3] [2]
6.8e-19 1.2e-30
DGLFHTTCGTPYYVAPEVLSRYYGPEADVWSCGVILYILLCGYPPFWDEN
++++++++++++++++++++++++++++++++++++++++++++++++++
226 KPGEKFSEIVGSPYYMAPEVLKRNYGPEIDIWSAGVILYILLCGVPPFWAETEQGVAQAILRGNIDFKREPWPHV
[5] [7]
7.4e-17 4.0e-44
MLDPNPMTRITIHQILCHPWF KQFSAMNKFKKMALRVIAECLSEEE
+++++++ ++++ ++++++++ ++++ +++++ ++++++++++++++
301 SDNAKDLVRQMLQPDPKIRLTAKQVLEHTWLQNAKKAPNVPLGDIVKSRLKQFSRMNRFKRRALRVIADHLSAEE
[8]
1.8e-39
IAGLKEMFKMMDTDNSGTITYEELK LMEAADVDNNGTIDYGEFITATMHMNKMEREEH
+++++++++ +++++++++++++++ + +++++++ + +++++++++++++++++++++
376 VEDIKEMFKVMDTDNDGIVSYEELKSGIAKFGSHLAESEVQMLIEAVDTNGRGALDYGEFLAVSLHLQRMANDEH
[8]
1.1e-05
LYAAFQYFDKDGSGYIT LMEAADVDNNGTIDYGEFITATMHMNKMEREEHLYA
+ +++ ++++++ ++++ + +++++ + + +++++ + + ++
451 LRRAFLFFDKDGDGFIEPEELQEALAEDGAVDITEVVKDILQEVDTDKDGKISFEEFVAMMKTGTDWRKASRHYS
AFQYFDKDGSGYIT
+
526 RGRFNSLSIRLIKDGSVKMGNE
HORVU.MOREX.r3.2HG0188200.1.V3
LENGTH = 542 COMBINED P-VALUE = 3.52e-199 E-VALUE = 2.8e-197
DIAGRAM: 97-[6]-7-[10]-9-[4]-11-[1]-3-[9]-4-[3]-[2]-33-[5]-18-[7]-17-[8]-47
[6] [10]
1.2e-29 5.3e-
LMGRYELGRTLGQGQFGKTYLCRHKATGQKVACKSIDKRKV QVRRE
+++ +++ ++++++++++++++++++++ ++++++ +++++ + +++
76 GSLSRKVPVGEIGPVLQRPMADVRALYNLERKLGSGQFGTTYLCTERATGLKYACKSVSKRKLVRRADVEDMRRE
[4] [1]
11 3.1e-21 1.3e-24
IQIMRHLRHH METKTKIYIVMEYCEGGELFDRI RRYFQQIISVVDYCHSMGVYHR
++++ +++++ ++++ ++++++++++++++++++ + +++ ++ +++ ++ +++ ++
151 VTILQHLSGQPNIAEFRGAFEDAENVHLVMEFCSGGELFDRITAKGSYSERQAAAVCRDILTVVHVCHFMGVLHR
[9] [3] [2]
8.6e-12 1.9e-17 4.9e-29
DLKPENFLL DENGNLKVCDFGLSA DGLFHTTCGTPYYVAPEVLSRYYGPEADVWSCGVILYILLCGYP
+++++++++ + ++++++++++++ + ++++++++++++++++++++++ +++++++++++++++++++
226 DLKPENFLLASPADEAPLKAIDFGLSVFIEEGKVYKDIVGSAYYVAPEVLHRNYGREIDVWSAGVILYILLCGSP
[5]
3.7e-18
PFWDEN MLDPNPMTRITIHQILCHPWF
++++++ ++++++++++++ ++++++++
301 PFWAETEKGIFDAILVGQVDFSSSPWPTISESAKDLIRQMLNRDPKRRITAVQALEHPWLKEGGASDRPIDSAVL
[7] [8]
8.5e-48 8.0e-
KQFSAMNKFKKMALRVIAECLSEEEIAGLKEMFKMMDTDNSGTITYEELK LMEAA
+++++++++++ ++++++++++ +++++++++++++++++++++++++++ +++++
376 LRMKQFKAMNKLKQLALKVIAENLSPEEIKGLKQMFNNMDTDKSGTITVEELKIGLTKLGSKISEAEVQKLMEAV
41
DVDNNGTIDYGEFITATMHMNKMEREEHLYAAFQYFDKDGSGYIT
+++++++++++++++++++ +++++++ + +++++++++ +++++
451 DVDKSGSIDYTEFLTAMMNKHKLEKEEDLLRAFQHFDKDSSGYISRDELEQAMTEYGMGDEANIKAVLDEVDKDK
HORVU.MOREX.r3.5HG0449270.1.V3
LENGTH = 559 COMBINED P-VALUE = 6.41e-198 E-VALUE = 5.2e-196
DIAGRAM: 69-[6]-7-[10]-9-[4]-11-[1]-3-[9]-4-[3]-[2]-33-[5]-19-[7]-17-[8]-19-[8]-22
[6]
0.0015
LMGRYE
++ ++
1 MGNCCVARPSFKRRGGGSPRQRGGRLGGANLRCLSTVSSVTDTPRATAQPWSSVTVLGKGLAASDNIEELLRRYQ
[10] [4]
0 9.3e-13 8.7e-20
LGRTLGQGQFGKTYLCRHKATGQKVACKSIDKRKV QVRREIQIMRHLRHH METKTKIYI
++ ++++++++++++++++++++++++++++++++ +++++++++++++ + +++ +++++
76 LGEELGRGEFGVTRRCMDAATGEKLACKSISKRKLRSSVDIEDVRREVAIMRSLPSHVNVVRLREAFEDDDSVHL
[1] [9]
1.5e-26 2.0e-12
VMEYCEGGELFDRI RRYFQQIISVVDYCHSMGVYHRDLKPENFLL DENGNLKVCDFGLSA
+++ ++++++++++ + +++++++++++++ ++++++++++++++ ++ + ++++++++++
151 VMEVCEGGELFDRIVVRGHYTERAAAAVMRTIMEVVQHCHQNGVMHRDLKPENFLYANASESSLLKVIDFGLSVC
[3] [2]
3.7e-19 5.0e-30
DGLFHTTCGTPYYVAPEVLSRYYGPEADVWSCGVILYILLCGYPPFWDEN
++++++++++++++++++++++++++++++++++++++++++++++++++
226 FKPGERFNEIVGSPYYMAPEVLKRNYGQEIDIWSAGVILYILLCGVPPFWAETDEGIAQAIIRSRIDFEREPWPK
[5] [7]
3.6e-19 1.3e-37
MLDPNPMTRITIHQILCHPWF KQFSAMNKFKKMALRVIAECLSEE
++ +++ ++++++++++++++ ++++ +++++++++ +++++++++
301 VSENAKDLVSMMLENNPYTRLTAQQVLEHPWIQNATAAPNIPLGEAVRLRLKQFTVMNKFKKKALLVVAEYLPAE
[8]
2.1e-42
EIAGLKEMFKMMDTDNSGTITYEELK LMEAADVDNNGTIDYGEFITATMHMNKMEREE
+++ + ++++++++++++++++++++ ++++++ ++++++++ +++++++++++++ ++
376 ELEAITELFHMLDTNKDGHLTIEELRKGLQMIGNNVHDTDVDMLMEAADLDGNGTLDCKEFVTVSVHLKKICSEE
[8]
8.6e-05
HLYAAFQYFDKDGSGYIT LMEAADVDNNGTIDYGEFITATMHMNKMEREEHLYAAF
++ + +++++++++++++ +++++ + + ++++ + + ++
451 HLPKVFNYFDKNMSGFIEMEELKEALSPRGDQKAVEDIIFDVDIDKDGKISYEEFELMMKAGVDWRNASRQYSRA
QYFDKDGSGYIT
+ +
526 VFNTLSRKMFKDVSLKLDPSSPLGGVGKGQRDVI
HORVU.MOREX.r3.7HG0686030.1.V3
LENGTH = 579 COMBINED P-VALUE = 1.06e-194 E-VALUE = 8.5e-193
DIAGRAM: 80-[6]-32-[10]-12-[4]-11-[1]-3-[9]-4-[3]-[2]-33-[5]-19-[7]-17-[8]-72
[6]
6.3e-27
LMGRYELGRTLGQGQFGKTYLCRHKATGQKVACKSIDKRKV
+ ++ ++++++++++++++++++++++++++++++ + +
76 TTTAEFGRRYVLGKELGRGEFGVTRRCRDAATGEALACKTIRRHRRRGGRGLNRKPAGGGGAEAAARAAAAAAAA
[10] [4] [1]
2.5e-11 9.2e-18 1.7e-28
QVRREIQIMRHLRHH METKTKIYIVMEYCEGGELFDRI RRYFQQIISVV
+++++++++++++ ++++++++++++++++++ +++++++++++
151 HAADVRREVAIMRRMSARGGAAVVRLREAREDQDGSVHLVMELCEGGELFDRIVARGHYSERAAAKIFRTIVNVI
[9] [3] [2]
1.6e-13 1.2e-17 3.6e-30
DYCHSMGVYHRDLKPENFLL DENGNLKVCDFGLSA DGLFHTTCGTPYYVAPEVLSRYYGPEADVWSCG
+ ++++++++++++++++++ ++++ ++++++++++ + +++++++++++++++++++++++++++++++
226 QICHSNGVIHRDLKPENFLFANKSEDAALKVIDFGLSVFFNPGDRFTEVVGSAYYMAPEVLKRNYGQEVDVWSAG
[5]
4.1e-22
VILYILLCGYPPFWDEN MLDPNPMTRITIHQILCHPWF
+++++++++++++++++ +++++++++++++++++++++
301 VILYILLCGVPPFWGDNDEKIAQAILRGGLDFNREPWPRVSGNAKDLIRRMLDPDPATRLTAHQVLEHPWLKNAD
[7]
3.1e-36
KQFSAMNKFKKMALRVIAECLSEEEIAGLKEMFKMMDTDNSGTITYEELK
++++++++++++++ +++++++++++ + ++++++++++++++++++++
376 TAPNVSLGEAVRSRLQQFSAMNKLKKKALGVVARNMPVEELDKYVQMFHLMDKDKNGNLSLEELMEGLHINGQRV
[8]
4.4e-43
LMEAADVDNNGTIDYGEFITATMHMNKMEREEHLYAAFQYFDKDGSGYIT
+ +++++++++++++++++++++++++++++ ++ +++ +++++++++++
451 PESEIRMLLEAADTDGNGTLDCDEFVTVSLHLKKMTNDKYLAAAFRYFDKDGSGFIEIDELRQELGPNEQAILEI
HORVU.MOREX.r3.5HG0495800.1.V3
LENGTH = 554 COMBINED P-VALUE = 8.09e-191 E-VALUE = 6.5e-189
DIAGRAM: 80-[6]-7-[10]-13-[4]-11-[1]-3-[9]-4-[3]-[2]-33-[5]-19-[7]-17-[8]-71
[6] [10]
8.4e-27 6.4e-10
LMGRYELGRTLGQGQFGKTYLCRHKATGQKVACKSIDKRKV QVRREIQIMRHLRHH
+ ++++++ +++++++++++++++++++++++++++ + ++ +++++++++++++
76 AGGECFAKRYRLGAELGRGEFGVTRRCEDAATGEALACKTIRRKRLRRAADAEDVRREVEILRRMSALEGAEGTV
[4] [1] [
4.6e-21 1.5e-24 6
METKTKIYIVMEYCEGGELFDRI RRYFQQIISVVDYCHSMGVYHRDLKPENFLL D
++++ +++++++++++++++++ +++ +++ +++ ++ +++++++++++++++
151 VRLREACEDAEGVHLVMELCEGGELFDRIFARGHYTERAAAKIGRTIARVVQLCHDNGVMHRDLKPENFLFAGKE
9] [3] [2]
.1e-14 1.6e-15 5.0e-30
ENGNLKVCDFGLSA DGLFHTTCGTPYYVAPEVLSRYYGPEADVWSCGVILYILLCGYPPFWDEN
++++++++++++++ ++++++++++ +++++++ + ++++++++++++++++++++++++++++
226 EDSPLKAIDFGLSVYFQPGERFTEVVGSGIYMAPEVLMRSYGPEADVWSAGVILYILLCGVPPFWGDTDERIAES
[5] [7]
2.3e-19 5.7e-42
MLDPNPMTRITIHQILCHPWF KQFSAMNKF
++++++++++++ ++ +++++ +++++++++
301 IIRGEINFEREPWPKVSHTAKDLVKKMLDPDPATRLTANQVSEHPWLKNADKAPNVSLGELVRSRLKQFSSMNKF
[8]
5.3e-40
KKMALRVIAECLSEEEIAGLKEMFKMMDTDNSGTITYEELK LMEAADVDNNGTIDYGE
+++++ ++++++++++++ + ++++++++++++++++++++ + ++ ++++++++++++
376 KKKALGVVAKSLPAEEIENYTQMFQTMDKDKDGTLTLEELKEGLRINGHPVPESEIQMLLEAGDIDGNGTLDTEE
FITATMHMNKMEREEHLYAAFQYFDKDGSGYIT
++++ ++ ++ +++++ ++ +++++++++++
451 FVTVLLHIKKKSNEEYLPEAFKYFDKDGNGYIEMEELMEALGDDELGPDEQVIKDIIRDVDTDEDGRISYQEFEV
HORVU.MOREX.r3.6HG0565350.1.V3
LENGTH = 465 COMBINED P-VALUE = 5.80e-149 E-VALUE = 4.7e-147
DIAGRAM: 7-[6]-7-[10]-8-[4]-10-[1]-[9]-7-[3]-2-[2]-29-[5]-199
[6] [10]
2.2e-35 4.1e-16
LMGRYELGRTLGQGQFGKTYLCRHKATGQKVACKSIDKRKV QVRREIQIMRHLRHH
+++++++++ +++++++++++++++++++++++++++++++ +++++++++++++++
1 MEERRTILMDRYEIGRHLGQGNFAKVYYARNLTSGQAVAIKMIDKEKVSRVGLMVQIKREISIMRLVRHPNVLKL
[4] [1] [9]
1.1e-20 1.2e-35 2.5e-16
METKTKIYIVMEYCEGGELFDRI RRYFQQIISVVDYCHSMGVYHRDLKPENFLLDENGNLKV
+++++++++++++++++++++++ ++++++++++++++++++++++++++++++++++ ++++
76 FEVMASKSKIYFVLEYAKGGELFNKITKGKLSEDAARKYFHQLISAVDYCHSRGVYHRDLKPENLLLDENENLKV
[3] [2]
1.3e-24 5.7e-29
CDFGLSA DGLFHTTCGTPYYVAPEVLSR YYGPEADVWSCGVILYILLCGYPPFWDEN
+++++++ +++++++++++++++++++++ +++++++++++++++++++++ +++++++
151 SDFGLSALAESTRQDGLLHTTCGTPAYVAPEVLSRRGYDGAKADIWSCGVILFVLVAGFLPFHDTNLIEMYRKIS
[5]
2.3e-14
MLDPNPMTRITIHQILCHPWF
+++++++++ ++ ++ + ++
226 RAEYRCPRPFSVELKDLLYKILDPDPSTRASVSRIKRSAWFRKPVDVNGLKIKQETRDKVQKGEPTTSESTEGSN
HORVU.MOREX.r3.2HG0153230.1.V3
LENGTH = 360 COMBINED P-VALUE = 7.54e-149 E-VALUE = 6.1e-147
DIAGRAM: 20-[6]-7-[10]-8-[4]-11-[1]-[9]-7-[3]-2-[2]-29-[5]-80
[6] [10]
1.2e-31 6.3e-14
LMGRYELGRTLGQGQFGKTYLCRHKATGQKVACKSIDKRKV QVRREIQ
++++++++++++++++++++++++ ++ + +++++++++++ +++++++
1 MVDSSAGGKMSAHGGGGGRTRVGRYELGRTLGEGTFAKVKFARNVETSENVAIKILDKDKVLKHKMIAQIKREIS
[4] [1]
2.9e-23 6.5e-37
IMRHLRHH METKTKIYIVMEYCEGGELFDRI RRYFQQIISVVDYCHSMGVYHRDLK
++++++++ +++++++++++++++++++++++ +++++++++++++++++++++++++
76 TMKLIRHPNVIRMYEVMASRTKIYIVMELVTGGELFDKIASRGRLKEDDARKYFQQLINAVDYCHSRGVYHRDLK
[9] [3] [2]
4.5e-14 2.4e-22 3.1e-29
PENFLLDENGNLKVCDFGLSA DGLFHTTCGTPYYVAPEVLSR YYGPEADVWSCGVILYILLCGYPP
++++++++++ ++++++++++ +++++++++++++++++++++ +++++++ ++++++++++++++++
151 PENLLLDANGTLKVSDFGLSALSQQVREDGLLHTTCGTPNYVAPEVINNKGYDGAKADLWSCGVILFVLMAGYLP
[5]
1.9e-18
FWDEN MLDPNPMTRITIHQILCHPWF
+++++ +++++++++++++++ + +++
226 FEDSNLMALYKKIYKADFSCPSWFSTSAKKLIKKILDPNPNTRITIAEVINNEWFKKGYQPPRFETAEVNLDDIN
HORVU.MOREX.r3.2HG0112410.1.V3
LENGTH = 450 COMBINED P-VALUE = 2.09e-148 E-VALUE = 1.7e-146
DIAGRAM: 8-[6]-7-[10]-8-[4]-10-[1]-[9]-7-[3]-2-[2]-29-[5]-183
[6] [10]
2.1e-32 8.2e-14
LMGRYELGRTLGQGQFGKTYLCRHKATGQKVACKSIDKRKV QVRREIQIMRHLRHH
+++++++++++++++++++++++++++ +++++++ +++++ +++++++++++++++
1 MGEQKGNILMHKYEMGKMLGQGTFAKVYHARNIETSQSVAIKVTDKEKVLKGGLTDQIKREISVMKLVKHPNIVQ
[4] [1] [9]
9.8e-20 5.8e-36 2.5e-16
METKTKIYIVMEYCEGGELFDRI RRYFQQIISVVDYCHSMGVYHRDLKPENFLLDENGNLK
+++++++++++++++++++++++ ++++++++++++++++++++++++++++++++++++++
76 MYEVMATKTKIYFVLEHVKGGELFNKVQRGRLKEDAARKYFQQLICAVDFCHSRGVYHRDLKPENLLLDENSNLK
[3] [2]
1.7e-21 3.6e-30
VCDFGLSA DGLFHTTCGTPYYVAPEVLSR YYGPEADVWSCGVILYILLCGYPPFWDEN
++++++++ +++++++++++++++++++++ +++++++++++++++++++++++++++ +
151 VSDFGLSTISECRRLDGLLHTSCGTPAYVAPEVINRKGYDGAKADIWSCGVILFVLMAGYLPFQDKNLMNMYKKI
[5]
2.3e-20
MLDPNPMTRITIHQILCHPWF
++++++++++++ ++++++++
226 GKAEFKCPSWFSSDIRRLLLRILDPNPSTRISIEKIMEHPWFRKGLDAKLLRYNLQAKDAVPASDMTATSDSLSS
HORVU.MOREX.r3.3HG0246590.1.V3
LENGTH = 464 COMBINED P-VALUE = 2.73e-147 E-VALUE = 2.2e-145
DIAGRAM: 7-[6]-7-[10]-8-[4]-10-[1]-[9]-7-[3]-2-[2]-29-[5]-198
[6] [10]
4.7e-36 4.1e-16
LMGRYELGRTLGQGQFGKTYLCRHKATGQKVACKSIDKRKV QVRREIQIMRHLRHH
+++++++++++++++++++++++ +++++++++++++++++ +++++++++++++++
1 MERKSTILMNRYELGRMLGQGTFAKVYHARSLATNQSVAIKVIDKEKVLRVGMIDQIKREISIMRLVRHPNIVQL
[4] [1] [9]
1.2e-19 1.2e-31 3.7e-17
METKTKIYIVMEYCEGGELFDRI RRYFQQIISVVDYCHSMGVYHRDLKPENFLLDENGNLKV
+++++++++ ++++++++++ ++ +++++++++++++++++ +++++++++++++++++++++
76 HEVMASKSKIYFAMEYVRGGELFARVAKGRLKEDAARKYFQQLIGAVDFCHSRDVYHRDLKPENLLVDEHGNLKV
[3] [2]
1.4e-20 3.6e-30
CDFGLSA DGLFHTTCGTPYYVAPEVLSR YYGPEADVWSCGVILYILLCGYPPFWDEN
+++++++ +++++++++++++++++++++ +++ +++++++++++++++++++++++++
151 SDFGLSALKECQKQDGLLHTTCGTPAYVAPEIINKKGYDGEKADIWSCGVILFVLLAGYLPFQDSNLMEMYRKIS
[5]
1.4e-18
MLDPNPMTRITIHQILCHPWF
+++++++++++++++ +++++
226 KGDVRYPQWFSSDARKLLCRLLDPNPNTRITMDKLIEHPWFKKGYKPAVMLGTPRASKDLNDVQAAFSTDHKDGE
HORVU.MOREX.r3.4HG0356420.1.V3
LENGTH = 439 COMBINED P-VALUE = 4.62e-147 E-VALUE = 3.7e-145
DIAGRAM: 8-[6]-7-[10]-8-[4]-11-[1]-[9]-7-[3]-2-[2]-29-[5]-171
[6] [10]
1.8e-33 1.8e-13
LMGRYELGRTLGQGQFGKTYLCRHKATGQKVACKSIDKRKV QVRREIQIMRHLRHH
+++++++++++++++++++++++++++++++++++++++++ +++++++++++++++
1 MSTTKVKRRVGKYELGRTIGEGTFAKVRFARNTETGDPVAIKILDKEKLLKHKMVEQIKREIATMKLIKHPNVVR
[4] [1] [9]
7.7e-21 2.6e-37 6.6e-1
METKTKIYIVMEYCEGGELFDRI RRYFQQIISVVDYCHSMGVYHRDLKPENFLLDENGNL
+ +++++++++++++++++++ + +++++++++++++++++++++++++++++++++ +++
76 IHEVMGSKTKIYIVLEYVTGGELFDTIVNHGRMREDEARRYFQQLINAVDYCHSRGVYHRDLKPENLLLDSCGNL
[3] [2]
5 5.5e-22 3.6e-29
KVCDFGLSA DGLFHTTCGTPYYVAPEVLSR YYGPEADVWSCGVILYILLCGYPPFWDEN
+++++++++ +++++++++++++++++++ + ++++ ++ +++++++++++++++++++++
151 KVSDFGLSALSQQLKDDGLLHTTCGTPNYVAPEVLEDQGYDGAMADLWSCGVILFVLLAGYLPFEDSNLMVLYKK
[5]
1.9e-18
MLDPNPMTRITIHQILCHPWF
+++++++++++++++++++++
226 ISDAEFTFPPWTSFPAKRLLTRILDPNPMTRITVQEMLEDEWFKKGYKRAEFDEKYDTTLDDVDAVFNDSEEHHV
HORVU.MOREX.r3.3HG0297850.1.V3
LENGTH = 509 COMBINED P-VALUE = 6.00e-147 E-VALUE = 4.9e-145
DIAGRAM: 7-[6]-7-[10]-8-[4]-11-[1]-[9]-7-[3]-2-[2]-29-[5]-242
[6] [10]
1.1e-37 2.4e-14
LMGRYELGRTLGQGQFGKTYLCRHKATGQKVACKSIDKRKV QVRREIQIMRHLRHH
+++++++++++++++++++++++++++++++++++++++++ +++++++++++++++
1 MDERRTILMGRYEIGKQLGQGTFAKVYYARNLATGQAVAIKMINKDKVTKVGLIEQIKREISVMRLVKHPNVLQL
[4] [1] [9]
2.7e-21 1.5e-34 2.5e-16
METKTKIYIVMEYCEGGELFDRI RRYFQQIISVVDYCHSMGVYHRDLKPENFLLDENGNLK
+++++++++++++++++++++++ ++++++++++++++++++++++++++++++++++ +++
76 FEVMATKSKIYFVLEYAKGGELFNKIVKEGKLNEDAARRYFHQLISAIDYCHSRGVYHRDLKPENLLLDENENLK
[3] [2]
1.3e-24 4.7e-27
VCDFGLSA DGLFHTTCGTPYYVAPEVLSR YYGPEADVWSCGVILYILLCGYPPFWDEN
++++++++ +++++++++++++++++++++ ++++++++++ +++++++++++++++ ++
151 VSDFGLSALADCARQDGLLHTTCGTPAYVAPEVLSRKGYDGAKADVWSSGVILFVLVAGYLPFHETNLIEMYRRI
[5]
1.7e-14
MLDPNPMTRITIHQILCHPWF
++++++++++ + ++++ ++
226 SKADFKCPRYFSAELKDLLHKILDPDPSTRIPISRIKKSAWYRRPVEVNAKKTEPEATHTFSAEAASSVSTGCST
HORVU.MOREX.r3.4HG0380570.1.V3
LENGTH = 449 COMBINED P-VALUE = 1.25e-143 E-VALUE = 1e-141
DIAGRAM: 15-[6]-7-[10]-8-[4]-11-[1]-[9]-7-[3]-2-[2]-29-[5]-174
[6] [10]
9.2e-32 1.2e-13
LMGRYELGRTLGQGQFGKTYLCRHKATGQKVACKSIDKRKV QVRREIQIMRHL
+++++++++++++++++++++++++++ +++++++++++++ ++++++++++++
1 MYRAKRAALSPKVKRRVGKYELGRTIGEGTFAKVRFAKNTETMEPVAIKILDKEKVQKLRLVEQIRREICTMKLI
[4] [1]
4.2e-18 6.3e-35
RHH METKTKIYIVMEYCEGGELFDRI RRYFQQIISVVDYCHSMGVYHRDLKPENFL
+++ + ++ ++++++++ +++++++ + ++++++++++++++++++++++++++++++
76 KHPNVVRLHEVMGSKARIFIVLEYITGGELFDTIYTNGRLKEEEARKYFQQLINAVDYCHSRGVYHRDLKLENLL
[9] [3] [2]
2.2e-15 2.1e-21 1.1e-29
LDENGNLKVCDFGLSA DGLFHTTCGTPYYVAPEVLSR YYGPEADVWSCGVILYILLCGYPPFWDEN
++++++++++++++++ +++++++++++++++++++ + ++++ ++++++++++++++++ +++++++
151 LDAAGNLKVSDFGLSALTEQVKADGLLHTTCGTPNYVAPEVIEDRGYDGAAADIWSCGVILFILLAGFLPFEDEN
[5]
3.1e-21
MLDPNPMTRITIHQILCHPWF
+++++++++++++++++++++
226 IIALYKKISEAQFTCPSWFSTGAKKLISRILDPNPSTRMTIPQILEDPWFKKGFKPPVFDDKYETSFDDVYAAFG
HORVU.MOREX.r3.6HG0551960.1.V3
LENGTH = 507 COMBINED P-VALUE = 6.88e-142 E-VALUE = 5.6e-140
DIAGRAM: 41-[6]-7-[10]-9-[4]-13-[1]-3-[9]-4-[3]-[2]-33-[5]-19-[7]-18-[8]-64
[6]
1.1e-25
LMGRYELGRTLGQGQFGKTYLCRHKATGQKVACK
+ +++++++++++++++ + ++++ ++++++++
1 MGACLSSSKQEARRRRPRGGKAEEKAAAAGAPAVEFGYDRDFDGRYEVGRLLGHGQFGYTFAAVDRLSGDRVAVK
[10] [4] [
4.7e-12 4.0e-21 2
SIDKRKV QVRREIQIMRHLRHH METKTKIYIVMEYCEGGELFDRI R
+++ ++ ++++++++++ ++++ +++ +++++++++++++++++++ +
76 RIDKAKMTRPVAVEDVKREVKILKALKGHENIVHFDNAFEDDSYVYIVMELCEGGELLDRILAKKNSRYSEKDAA
1] [9] [3] [2
.4e-21 2.0e-13 9.7e-18 6.
RYFQQIISVVDYCHSMGVYHRDLKPENFLL DENGNLKVCDFGLSA DGLFHTTCGTPYYVAPEVLSRYY
+ ++++ + + ++ ++ ++++ +++++++ +++++++++++++++ + ++ +++++++++++++++++
151 VVVRQMLKVAAECHLRGLVHRDMKPENFLFKSTKEDSPLKATDFGLSDFIKPGKKFRDIVGSAYYVAPEVLKRRS
] [5]
4e-25 1.3e-15
GPEADVWSCGVILYILLCGYPPFWDEN MLDPNPMTRITIHQI
++++++++++++ ++++++ ++++ + +++++++ +++++++
226 GPESDVWSIGVITYILLCGRRPFWDKTEDGIFKEVLRNKPDFRKRPWPSISSSAKDFVKKLLVKNPRARLTAAQA
[7]
9.6e-31
LCHPWF KQFSAMNKFKKMALRVIAECLSEEEIAGLKEMFKMMDTDNSGTITYEELK
++++++ ++++ +++++ ++++++ + +++++++++++++++ ++++ +++++++
301 LSHPWVREGGDASEIPVDISVLYNMRQFVKYSRFKQFALRALASTVNEEELADLKDQFDAIDVDKSGSISIEEMR
[8]
4.1e-10
LMEAADVDNNGTIDYGEFITATMHMNKMEREEHLYAAFQYFDKDGSGYIT
++ + ++ + + ++++++++ + ++ +
376 HALAKDLPWRLKGPRVLEIIQAIDSNTDGLVDFKEFVAATLHIHQMAELDSERWGLRCQAAFSKFDLDGDGYITP
HORVU.MOREX.r3.2HG0110800.1.V3
LENGTH = 304 COMBINED P-VALUE = 2.04e-140 E-VALUE = 1.7e-138
DIAGRAM: 14-[6]-7-[10]-8-[4]-11-[1]-[9]-7-[3]-2-[2]-29-[5]-30
[6] [10]
1.5e-30 4.6e-13
LMGRYELGRTLGQGQFGKTYLCRHKATGQKVACKSIDKRKV QVRREIQIMRHLR
++++++++++++++++++++++++++++++++++++++ ++ ++++++++++++
1 MYKARRQASLKVRRRVGKYELGRTIGEGTFAKVRFAKDTESGDHVAIKILDKAKVQKHGLVEQIRREICTMKLIQ
[4] [1]
3.2e-17 3.2e-35
HH METKTKIYIVMEYCEGGELFDRI RRYFQQIISVVDYCHSMGVYHRDLKPENFLL
++ + ++ ++++++++++++++ + + +++++++++++++++++++++++++++++++
76 HPNVVRLHEVMGSKARIFIVLEYVTGGELHDIIAAHGSLKEDEARRYFQQLINAVDYCHSRGVYHRDLKLENLLL
[9] [3] [2]
1.8e-15 2.1e-21 3.6e-29
DENGNLKVCDFGLSA DGLFHTTCGTPYYVAPEVLSR YYGPEADVWSCGVILYILLCGYPPFWDEN
+++++++++++++++ +++++++++++++++++++ + ++++ ++ +++++++++++++++++++++
151 DTAGNLKVSDFGLSAISEQAKADGLLHTTCGTPNYVAPEVIEDKGYDGAFADLWSCGVILFVMLAGYLPFEDDNV
[5]
1.2e-19
MLDPNPMTRITIHQILCHPWF
+++++++++++++++++++++
226 SALYKKISGAQFTCPSWFSDGAKRLIHRILDPNPSTRITIPQLLKDPWFKKGYKPPVFHEKYQTSLDDVDAAFGD
HORVU.MOREX.r3.4HG0352300.1.V3
LENGTH = 444 COMBINED P-VALUE = 1.79e-139 E-VALUE = 1.4e-137
DIAGRAM: 7-[6]-7-[10]-8-[4]-11-[1]-[9]-7-[3]-2-[2]-29-[5]-177
[6] [10]
3.4e-31 2.0e-12
LMGRYELGRTLGQGQFGKTYLCRHKATGQKVACKSIDKRKV QVRREIQIMRHLRHH
++++++++++++ ++++++++++ +++++++++++++++++ ++++++++++++++
1 MANRGKILMERYELGRLLGKGTFGKVHFARSLESNQSVAIKMLDKEKVLKVGLSEQIRREVTTMRLVAHKNIVQL
[4] [1] [9]
3.5e-21 2.0e-33 2.5e-16
METKTKIYIVMEYCEGGELFDRI RRYFQQIISVVDYCHSMGVYHRDLKPENFLLDENGNLK
++++ ++++++++++++++++++ +++++++++++++++++++++++++++++++++ +++
76 HEVMATRNKIFFVMEYVKGGELFDKVAKSGKLTEGAAHKYFQQLISAVDYCHSQGVYHRDLKLENLLLDENENLK
[3] [2]
3.8e-23 1.2e-27
VCDFGLSA DGLFHTTCGTPYYVAPEVLSR YYGPEADVWSCGVILYILLCGYPPFWDEN
++++++++ +++++++++++++++++++++ ++++++++++++++++++ ++++++++++
151 VSDFGLSALSESKRQDGLLHTTCGTPAYVAPEVISKTGYDGAKSDIWSCGVILFVLIAGYLPFHGSNLMEMYRKI
[5]
7.4e-17
MLDPNPMTRITIHQILCHPWF
+++++++++ +++++++++++
226 EQGDFRCPSWFSHKLQKLLCKILDPNPSTRASIQKIKESTWFRKGPRGTLAVKERTPSENVTTNAPPTAGVRARK
HORVU.MOREX.r3.5HG0464580.1.V3
LENGTH = 440 COMBINED P-VALUE = 3.66e-139 E-VALUE = 3e-137
DIAGRAM: 7-[6]-7-[10]-8-[4]-11-[1]-[9]-7-[3]-2-[2]-29-[5]-173
[6] [10]
1.1e-27 3.7e-13
LMGRYELGRTLGQGQFGKTYLCRHKATGQKVACKSIDKRKV QVRREIQIMRHLRHH
++++++++++++ + ++++++++++++++ +++++++++++ ++++++++++++++
1 MENSGKIVMGRYELGRLLGKGAFGKVHYAKNLESNRGVAIKMMDKETVLKVGLAEQVRREITTMRLVAHKSIVQL
[4] [1] [9]
1.8e-21 1.6e-35 2.5e-16
METKTKIYIVMEYCEGGELFDRI RRYFQQIISVVDYCHSMGVYHRDLKPENFLLDENGNLK
+++++++++++++ +++++++++ +++++++++++++++++++++++++++++++++ +++
76 HEVMATRSKIYFVMEYMKGGELFDKVSKAGKLTEGAAHKYFQQLISAVDYCHSRGVYHRDLKPENLLLDENENLK
[3] [2]
7.8e-23 2.0e-28
VCDFGLSA DGLFHTTCGTPYYVAPEVLSR YYGPEADVWSCGVILYILLCGYPPFWDEN
++++++++ +++++++++++++++++++++ +++++++++++++++++++++++++++++
151 VSDFGLSALSESKRQDGLLHTTCGSPAYVAPEVISKGGYDGAKSDIWSCGVILFVLVAGYLPFQGQNLIEMYRKI
[5]
3.4e-16
MLDPNPMTRITIHQILCHPWF
+ +++++++++++++++++++
226 EKGDFRCPGWVSPKLQKLLHKIMDPDPNKRISIQKIKESTWFRKGPGENLTVKERLPNENTTTDAVPTLGVRRRK
HORVU.MOREX.r3.1HG0077650.1.V3
LENGTH = 525 COMBINED P-VALUE = 1.24e-136 E-VALUE = 1e-134
DIAGRAM: 47-[6]-7-[10]-8-[4]-10-[1]-[9]-7-[3]-2-[2]-29-[5]-219
[6]
3.4e-34
LMGRYELGRTLGQGQFGKTYLCRHKATG
+++++++++ ++++++++++++++++++
1 MAATPPSSRDASPQPRRPASSAGRPAAAAGRPSGTGAVAGNGKRGGLLLGRYELGRILGHGTFAKVYHARHADTG
[10] [4]
1.6e-13 5.2e-21
QKVACKSIDKRKV QVRREIQIMRHLRHH METKTKIYIVMEYCEGGELFDRI
+ ++++++++++ +++++++++++++++ ++++++++++++++++++++ ++
76 ETVAIKVLDKEKALRAGLVPHIKREITILRRVRHPNIVRLFEVMATKSKIYFVMEFVRGGELFARVAKGRLKEDT
[1] [9] [3]
2.9e-31 7.9e-15 9.6e-19
RRYFQQIISVVDYCHSMGVYHRDLKPENFLLDENGNLKVCDFGLSA DGLFHTTCGTPYYVAPEVLSR
+++++++++++ +++++++++++++++++++++++ ++++++++++ ++++++ ++++ +++++ + +
151 ARRYFQQLISAVGFCHARGVFHRDLKPENLLVDEHGDLKVSDFGLSAVADQFHPDGLLHTFCGTPSYVAPEMLAR
[2] [5]
8.2e-31 3.1e-16
YYGPEADVWSCGVILYILLCGYPPFWDEN MLDPNPMTRITIHQI
+++++++++++++++++++++++++++++ ++++++ ++++++++
226 RGYDGAKADIWSCGVILFVLMAGYLPFHDQNLMAMYRKIYRGEFRCPRWFSKDLTSLLNRLLDTNPETRITMAEV
LCHPWF
+++ ++
301 MQSRWFQKGFRPVRFYVEDDQLHSLADGESEELGLVEPAEPPPPPPLPPPLPPPPQQEDDDSGWESDSSVASCPA
HORVU.MOREX.r3.3HG0290180.1.V3
LENGTH = 519 COMBINED P-VALUE = 1.74e-135 E-VALUE = 1.4e-133
DIAGRAM: 44-[6]-7-[10]-8-[4]-10-[1]-[9]-7-[3]-2-[2]-29-[5]-216
[6]
5.4e-34
LMGRYELGRTLGQGQFGKTYLCRHKATGQKV
+++++++++ ++ ++++++++++++ +++++
1 MAAVKPPPPDPSPQAARLPSPSSSSSSASAAAAAKRGGTGSRGLLMGRYELGRVLGKGTFAKVYHARHLQTGESV
[10] [4] [1
8.3e-13 6.0e-22 3.
ACKSIDKRKV QVRREIQIMRHLRHH METKTKIYIVMEYCEGGELFDRI RR
+++++++++ +++++++++++++++ ++++++++++++++++++++ ++ ++
76 AIKVLDREKAVRSGLVSHIKREIAVLRRVRHPNIVHLFEVMATKTKIYFVMELVRGGELFSRVSKGRLKEDTARR
] [9] [3] [
0e-29 3.7e-17 1.2e-19 7
YFQQIISVVDYCHSMGVYHRDLKPENFLLDENGNLKVCDFGLSA DGLFHTTCGTPYYVAPEVLSR Y
+++ +++++ +++ ++++++++++++++++++++++++++++++ +++++ ++++++++++++ + +
151 YFQHLISAVGFCHTRGVFHRDLKPENLLVDEAGNLKVSDFGLSAVAEPFQPEGLLHTFCGTPAYVAPEVLARRGY
2] [5]
.6e-29 1.2e-15
YGPEADVWSCGVILYILLCGYPPFWDEN MLDPNPMTRITIHQILCH
+++++++++++++++++++++++++++ ++++++++++ ++++++
226 EGAKADIWSCGVILFVLMAGYLPFHDQNLMAMYRKVYKGEFRCPRWFSKDLTSLIMRFLDTNPSTRITLPEVMES
PWF
++
301 RWFKKGFRPVKFYIEDDQLYNVIDAENDMLDLGLSDPLPQPLPPPPPPPQEVDGNDSGSESDSSVMSCPATSSFE
HORVU.MOREX.r3.5HG0483990.1.V3
LENGTH = 446 COMBINED P-VALUE = 4.52e-135 E-VALUE = 3.7e-133
DIAGRAM: 11-[6]-7-[10]-8-[4]-11-[1]-[9]-7-[3]-2-[2]-29-[5]-175
[6] [10]
2.2e-28 8.2e-14
LMGRYELGRTLGQGQFGKTYLCRHKATGQKVACKSIDKRKV QVRREIQIMRHLRHH
+++++++++ +++++++ ++ ++++++++ +++++ +++++ +++++++++++++++
1 MEDAAEGKTNVLQGKYELGRVLGHGNFGRVHAARDLRTGRGVAVKVVAKDKVERAGMVEQIKREIAVMKMVSHPN
[4] [1] [9]
9.9e-19 9.3e-34 5.1
METKTKIYIVMEYCEGGELFDRI RRYFQQIISVVDYCHSMGVYHRDLKPENFLLDEN
+++++++++ ++++++++++ ++ +++++++++++++++ ++++++++++++++++++
76 IVELHEVLATRTKIYLALELVRGGELFARISRAGRLREDVARRYFRQLISAVDFCHGRGVYHRDLKPENLLLDEA
[3] [2]
e-16 6.9e-20 6.9e-31
GNLKVCDFGLSA DGLFHTTCGTPYYVAPEVLSR YYGPEADVWSCGVILYILLCGYPPFWDEN
++++++++++++ +++++++++++++++++++ + +++++++++++++++++++++++++++++
151 GNLKVADFGLSALAGHARPDGLLHTACGTPAYVAPEVLGGNGYDGAKADIWSCGVILYVLLVGALPFQDENLMSM
[5]
3.4e-16
MLDPNPMTRITIHQILCHPWF
+++++++ +++++ + +++++
226 YRKMQRGGFLCPSWVSKDARKLIGRLLDPNPSSRITIASLVESPWFKKTSSIPSPLLEPVSSAAARGNGEDKDEP
HORVU.MOREX.r3.1HG0071290.1.V3
LENGTH = 476 COMBINED P-VALUE = 6.90e-135 E-VALUE = 5.6e-133
DIAGRAM: 6-[6]-7-[10]-8-[4]-10-[1]-[9]-7-[3]-2-[2]-29-[5]-211
[6] [10]
8.5e-34 2.3e-13
LMGRYELGRTLGQGQFGKTYLCRHKATGQKVACKSIDKRKV QVRREIQIMRHLRHH
+ +++++++++++++++++++++++++++++++++++++++ + ++++++++ ++++
1 MEDRSVLTKRYEIGRQLGQGTFAKVYYARNIANGQSVAIKMIDKDKILKVGLVDQLKREISIMRIVRHPNVLQLF
[4] [1] [9]
8.7e-20 4.1e-33 9.4e-12
METKTKIYIVMEYCEGGELFDRI RRYFQQIISVVDYCHSMGVYHRDLKPENFLLDENGNLKVC
++++++++++++++++++++++ +++++++++++++++++++++++++++++++++ + ++
76 EVMATRSKIYFVLEYAKGGELFNKLAKGKLSEEGARKYFHQLISAIDYCHSRGVYHRDLKPENLLVDEYETLRVS
[3] [2]
1.2e-22 1.0e-27
DFGLSA DGLFHTTCGTPYYVAPEVLSR YYGPEADVWSCGVILYILLCGYPPFWDEN
++++++ +++++++++++++++++++++ + ++++++++++++++++++++++++ ++
151 DFGLSALTKSKWRDGLLHTACGTPAYVAPEVLSRKGYNGAKADVWSCGVILFVLVAGYLPFHERNLIELYRKIAK
[5]
8.4e-16
MLDPNPMTRITIHQILCHPWF
++++++++++++ ++ ++++
226 AEYRCPRYFSTELKELLSGILDPDPNTRMSITRIKRSPWYRKPVERTPPKKDKTYTSEADASGLACRNSSDGPLS
HORVU.MOREX.r3.3HG0290170.1.V3
LENGTH = 478 COMBINED P-VALUE = 2.05e-133 E-VALUE = 1.7e-131
DIAGRAM: 11-[6]-7-[10]-8-[4]-11-[1]-[9]-11-[3]-2-[2]-29-[5]-203
[6] [10]
2.5e-27 2.0e-12
LMGRYELGRTLGQGQFGKTYLCRHKATGQKVACKSIDKRKV QVRREIQIMRHLRHH
++++++++ +++++++++++ ++++++++ +++++ +++ + ++++++ +++++ ++
1 MAMEKNQDSKVIMGRYRLGHLLGRGSFAKVYKAHNISTGEVVAIKVFDKEAVRQSGTVEQVKREVDVMRRVHHPN
[4] [1] [9]
1.4e-20 2.3e-34 9.8
METKTKIYIVMEYCEGGELFDRI RRYFQQIISVVDYCHSMGVYHRDLKPENFLLDEN
++++++++++++++++++++ + ++++++++ +++++++++++++++++++++++++
76 VVRLHEVMATRSRIYFVMEYASGGELFARLAQSTRFPEPVARRYFQQLVTAVEFCHSRGVYHRDLKPENLLLDAD
[3] [2]
e-16 2.9e-19 3.1e-30
GNLKVCDFGLSA DGLFHTTCGTPYYVAPEVLSR YYGPEADVWSCGVILYILLCGYPPFWDEN
++++++++++++ + +++++++++ +++++++ + +++++++++++++++++++++ +++++++
151 GNLKVSDFGLSALADAAASRHGGDALLHTTCGTPSYVAPEVILKRGYDGAKADVWSCGVILFVLLAGRLPFHDTN
[5]
2.2e-15
MLDPNPMTRITIHQILCHPWF
++++++++++++ +++ +++
226 LMLLYKRIARSDYKCPAWFSLDARKLLARLLDPNPNTRITITKLMARTWFRKDPCPLDDKPLDTSETAVFLGEEA
HORVU.MOREX.r3.4HG0410930.1.V3
LENGTH = 445 COMBINED P-VALUE = 3.26e-133 E-VALUE = 2.6e-131
DIAGRAM: 14-[6]-7-[10]-8-[4]-11-[1]-[9]-7-[3]-2-[2]-29-[5]-171
[6] [10]
4.6e-25 6.3e-14
LMGRYELGRTLGQGQFGKTYLCRHKATGQKVACKSIDKRKV QVRREIQIMRHLR
+++ ++++++++++++++++ +++++++ ++++++++++ +++++++++++++
1 MAAAGRGGGPRRTTRVGPYELGKTIGEGSFAKVKVAKDTRNGATCAIKVLDRNHVLRHKMVEQIKREIATMKLIR
[4] [1]
1.3e-20 3.2e-35
HH METKTKIYIVMEYCEGGELFDRI RRYFQQIISVVDYCHSMGVYHRDLKPENFLL
++ +++++++++++++++++++++++ +++++++++++++++++++++++++++++++
76 HPNVVQLHEVMASKSKIYMVLEFVEGGELFDKIVNSGKLGEDEARRYFHQLINAVDYCHSRGVYHRDLKPENLLL
[9] [3] [2]
2.0e-13 1.2e-20 1.0e-27
DENGNLKVCDFGLSA DGLFHTTCGTPYYVAPEVLSR YYGPEADVWSCGVILYILLCGYPPFWDEN
++ + ++++++++++ +++++++++++++++++++ + +++ +++++++ ++++++++++++++++
151 DSYGALKVSDFGLSAFSPQTKDDGLLHTACGTPNYVAPEVLADKGYDGMAADVWSCGIILFVLMAGYLPFDDPNL
[5]
1.2e-19
MLDPNPMTRITIHQILCHPWF
++++++ ++++++++++++++
226 MTLYKLISRANVSCPPWFSTGARNLIKRILDPNPHTRITIAQILEDEWFKKDYKPPLSEHNEDVSLEDVDAAFDS
HORVU.MOREX.r3.7HG0720050.1.V3
LENGTH = 398 COMBINED P-VALUE = 1.71e-131 E-VALUE = 1.4e-129
DIAGRAM: 8-[6]-7-[10]-8-[4]-11-[1]-[9]-5-[3]-2-[2]-29-[5]-132
[6] [10]
2.0e-27 2.1e-14
LMGRYELGRTLGQGQFGKTYLCRHKATGQKVACKSIDKRKV QVRREIQIMRHLRHH
++++++++++++++++++++++++ +++ +++++++++ ++ ++++++++++ ++++
1 MAGAPRKKLVGRYEVGRTIGQGSFAKVKFAVDSDTGVPVAMKVLDKATILNHRMLQQIKREISIMKIVRHPNIVR
[4] [1] [9]
1.2e-17 1.6e-33 1.4e-1
METKTKIYIVMEYCEGGELFDRI RRYFQQIISVVDYCHSMGVYHRDLKPENFLLDENGNL
++ ++++++++++ +++++++++ +++++++++++++++++++++++++++++++++ +++
76 LNEVLAGRTKIYIILELITGGELFDKIARQGKIRENEARKYFQQLIDAIDYCHSKGVYHRDLKPENLLLDSRGNL
[3] [2]
3 4.3e-21 7.7e-27
KVCDFGLSA DGLFHTTCGTPYYVAPEVLSR YYGPEADVWSCGVILYILLCGYPPFWDEN
+++++++++ ++++++++++++++++++++ +++ +++++++++++++++++++++ +
151 KVSDFGLSTLSQNGVGLLHTTCGTPNYIAPEVLSNDGYDGSAADIWSCGVILYVLMAGYLPFEENDLPTLYDKIT
[5]
5.7e-19
MLDPNPMTRITIHQILCHPWF
++++++++++++ +++ ++++
226 AAQFSCPDWFSPGAKSMIQRILDRNPKTRITIEEIRADPWFKKNYVALRRGEDENVSLDDVQAVFDDIEDKYVSE
HORVU.MOREX.r3.4HG0350770.1.V3
LENGTH = 442 COMBINED P-VALUE = 2.91e-131 E-VALUE = 2.4e-129
DIAGRAM: 12-[6]-7-[10]-8-[4]-11-[1]-[9]-7-[3]-2-[2]-29-[5]-170
[6] [10]
3.3e-29 6.3e-14
LMGRYELGRTLGQGQFGKTYLCRHKATGQKVACKSIDKRKV QVRREIQIMRHLRHH
+++++++++ +++++++ +++++++++++++++++ +++++ +++++++++++++++
1 MADQAEGKKGGVLQGRYEMGRVLGHGNFGRVHIARDLRTGRAVAVKVVAKDKVVRAGMVEQIKREIAVMKRVSHP
[4] [1] [9
2.7e-19 3.5e-33 2.
METKTKIYIVMEYCEGGELFDRI RRYFQQIISVVDYCHSMGVYHRDLKPENFLLDE
+++++++++ ++++++++++ ++ +++++++++++++++++++++++++++++++++
76 NIVELHEVMATRSKIYLALELVRGGELFARIERSGRVTEDVARRYFRQLISAIDFCHARGVYHRDLKPENLLLDE
] [3] [2]
1e-14 5.9e-18 3.1e-28
NGNLKVCDFGLSA DGLFHTTCGTPYYVAPEVLSR YYGPEADVWSCGVILYILLCGYPPFWDEN
++++++ ++++++ ++++++ ++++ +++++++ + +++++++ +++++++++++++++++ + +
151 AGNLKVVDFGLSALADHARADGLLHTLCGTPGYAAPEVLRDKGYDGAKADLWSCGVILYVLLAGSLPFPDNNVVT
[5]
2.1e-17
MLDPNPMTRITIHQILCHPWF
+++++++++++++++ + +++
226 MYKKAQRGDYRCPPWFSTDARRLIPKLLDPDPTTRITVAQLVETPWFKKTSIAKPVSLGPPADSACAKDAADKDE
HORVU.MOREX.r3.1HG0017980.1.V3
LENGTH = 466 COMBINED P-VALUE = 3.61e-131 E-VALUE = 2.9e-129
DIAGRAM: 19-[6]-8-[10]-8-[4]-11-[1]-[9]-7-[3]-2-[2]-29-[5]-186
[6] [10]
1.0e-31 7.4e-13
LMGRYELGRTLGQGQFGKTYLCRHKATGQKVACKSIDKRKV QVRREIQ
+++ +++++++++++++++++++++++++++++++++++++ +++++++
1 MVATGDAEDAAAGCRARAALLGGYELGRTLGEGNFGKVKHARHRATGDHFAVKILDRGRVLSLRGADDQVRREIA
[4] [1]
3.0e-20 7.3e-30
IMRHLRHH METKTKIYIVMEYCEGGELFDRI RRYFQQIISVVDYCHSMGVYHRDLK
++ +++++ ++++++++++++++++++++++ +++++++++++++++ +++++++++
76 TLTMLAHPNVVRLHEVAASKTKIYMVLEFVNGGELFDRIAMKKKLSEREGRRLFQQLIDGVSYCHGKGVYHRDLK
[9] [3] [2]
3.0e-13 2.9e-22 4.2e-27
PENFLLDENGNLKVCDFGLSA DGLFHTTCGTPYYVAPEVLSR YYGPEADVWSCGVILYILLCGYPP
+++++ + +++++++++++++ +++++++++++++++++++++ +++ ++++++++++++++++ ++
151 PENVLIDRKGNIKISDFGLSALPQHLGNDGLLHTTCGSPNYIAPEVLQNRGYDGSLSDIWSCGVILYIMLVGNLP
[5]
1.1e-16
FWDEN MLDPNPMTRITIHQILCHPWF
+++++ ++ +++++++ +++++ ++++
226 FDDRNMVVLYQKIFKGDAQIPEWLSPSAQNLLRRILEPNPRKRINMAEIKIHEWFQKDYIPVAPYDDDDEDVRLG
HORVU.MOREX.r3.4HG0385110.1.V3
LENGTH = 509 COMBINED P-VALUE = 2.61e-129 E-VALUE = 2.1e-127
DIAGRAM: 12-[6]-7-[10]-8-[4]-11-[1]-[9]-4-[3]-2-[2]-29-[5]-24-[10]-201
[6] [10]
1.5e-29 2.8e-11
LMGRYELGRTLGQGQFGKTYLCRHKATGQKVACKSIDKRKV QVRREIQIMRHLRHH
+++++++++++ ++++++++++++ +++++++++++++++ ++++++++++ ++
1 MDGNTRGGGHSEALKNYNLGRTLGIGTFGKVRIAEHKHTGHKVAIKILNRRQMRTMNMEEKAKREIKILRLFIHP
[4] [1] [9
9.9e-19 5.3e-32 5.
METKTKIYIVMEYCEGGELFDRI RRYFQQIISVVDYCHSMGVYHRDLKPENFLLDE
+ +++ +++++++++ +++++ + +++++++++++++++++++++++++++++++++
76 HIIRLYEVIYTPTDIFVVMEYCKYGELFDCIVEKGRLQEDEARRIFQQIISGVEYCHRNMVVHRDLKPENLLLDS
] [3] [2]
4e-12 7.6e-19 4.2e-29
NGNLKVCDFGLSA DGLFHTTCGTPYYVAPEVLSR YYGPEADVWSCGVILYILLCGYPPFWDEN
+++++++++++++ +++++++++++++++++++++ + +++++++++++++++++++++++++++
151 KYNVKLADFGLSNVMHDGHFLKTSCGSPNYAAPEVISGKLYAGPEVDVWSCGVILYALLCGTLPFDDDNIPNLFK
[5] [10]
7.8e-21 1.2e-05
MLDPNPMTRITIHQILCHPWF QVRREIQ
++++++++++++ ++++++++ + +
226 KIKGGIYILPSHLSALARDLIPRMLVVDPMKRITIREIREHPWFQNRLPRYLAVPPPDTAQQAKMIDEDTLKDIV
IMRHLRHH
++ + +
301 NLGYDKDHVCESLCNRLQNEATVAYYLLLDNRFRATSGYLGADYQQSMGRSLNQFTSSESASPSTRQYLPGTNDS
HORVU.MOREX.r3.3HG0286490.1.V3
LENGTH = 502 COMBINED P-VALUE = 3.69e-129 E-VALUE = 3e-127
DIAGRAM: 9-[6]-7-[10]-8-[4]-11-[1]-[9]-4-[3]-2-[2]-29-[5]-236
[6] [10]
5.2e-28 1.8e-12
LMGRYELGRTLGQGQFGKTYLCRHKATGQKVACKSIDKRKV QVRREIQIMRHLRHH
+++++++++++ ++++++++++++ +++++++++++++++ +++++++++++ ++
1 MEAGGKDGNPLKNYRIGKTLGIGSFGKVKIAEHIKTGHKVAIKILNRRKIKNMDMEEKVKREIKILRLFMHPHII
[4] [1] [9]
1.0e-17 1.7e-32 1.1e-
METKTKIYIVMEYCEGGELFDRI RRYFQQIISVVDYCHSMGVYHRDLKPENFLLDENGN
++ + +++++++++ +++++++ ++++++++++++++++++++++++++++++++ ++
76 RLYEVIEAPADIYVVMEYVKSGELFDYIVEKGRLQEQEARRFFQQIISGVQYCHRNMVVHRDLKPENLLLDNNCD
[3] [2]
11 7.6e-19 2.0e-29
LKVCDFGLSA DGLFHTTCGTPYYVAPEVLSR YYGPEADVWSCGVILYILLCGYPPFWDEN
++++++++++ +++++++++++++++++++++ + +++++++++++++++++++++++++++
151 VKIADFGLSNVMRDGHFLKTSCGSPNYAAPEVISGKLYAGPEVDVWSCGVILYALLCGTLPFDDENIPNLFKKIK
[5]
9.4e-22
MLDPNPMTRITIHQILCHPWF
+++++++++++++++++++++
226 GGIYTLPSHLSGPARDLIPRMLVVDPMKRITIQEIREHPWFEAQLPRYLAVPPPDTAQQVKKIDEESLGKVISLG
HORVU.MOREX.r3.2HG0108670.1.V3
LENGTH = 493 COMBINED P-VALUE = 4.13e-129 E-VALUE = 3.3e-127
DIAGRAM: 31-[6]-7-[10]-8-[4]-10-[1]-[9]-7-[3]-2-[2]-29-[5]-203
[6]
5e-31
LMGRYELGRTLGQGQFGKTYLCRHKATGQKVACKSIDKRKV
+++++++++ +++++++++++++ + ++++++++++++++
1 MAQRGSLGETEAHLSCGSDVKMHDGTEKGTVLMNRYELGRILGHGTFAKVYHARSLMCNHSVAIKVIDKEKVLRV
[10] [4] [1]
2.0e-13 4.2e-19 2.2e-30
QVRREIQIMRHLRHH METKTKIYIVMEYCEGGELFDRI RRYFQQIISVVDYCH
++++++++++++++ +++++++++++++++++ ++ ++ ++++++++ ++++++
76 GMIERIKREISVMRLVRHPNIVQLHEVMASKTKIYFVMEHVRGGDLFSRVAKGRLREEVARKFFQQLIAAIDFCH
[9] [3] [2]
1.3e-12 1.7e-18 4.3e-30
SMGVYHRDLKPENFLLDENGNLKVCDFGLSA DGLFHTTCGTPYYVAPEVLSR YYGPEADVWSCGVI
+++++++++++++++ +++ +++++++++++ + +++++++++ +++++++++ ++++ +++++++++
151 SRGVYHRDLKLENLLIDDTDNIKVSDFGLSALRESLGPDDLLHTTCGTPSYVAPEIINNKGYDGATADVWSCGVI
[5]
6.6e-17
LYILLCGYPPFWDEN MLDPNPMTRITIHQILCHPWF
+++++++++++++++ ++++++ +++++ ++ +++++
226 LFVLLAGYLPFHDSNLMEMYRKIGKSEFKSPHWFSYDVSKILGKLLDPNPETRITIEKLVEDPWFKAEYRPAVLL
HORVU.MOREX.r3.1HG0017930.1.V3
LENGTH = 466 COMBINED P-VALUE = 8.78e-129 E-VALUE = 7.1e-127
DIAGRAM: 19-[6]-8-[10]-8-[4]-11-[1]-[9]-7-[3]-2-[2]-29-[5]-186
[6] [10]
8.2e-31 7.4e-13
LMGRYELGRTLGQGQFGKTYLCRHKATGQKVACKSIDKRKV QVRREIQ
+++ +++++++++++++++++++++++++++++++++++++ +++++++
1 MVATGDAEDAAAGCRARAALLGAYELGRTLGEGSFGKVKHARHRATGDHFAVKILDRGRVLSLRGADDQVRREIA
[4] [1]
3.0e-20 7.3e-30
IMRHLRHH METKTKIYIVMEYCEGGELFDRI RRYFQQIISVVDYCHSMGVYHRDLK
++ +++++ ++++++++++++++++++++++ +++++++++++++++ +++++++++
76 TLTMLAHPNVVRLHEVAASKTKIYMVLEFVNGGELFDRIAMKRKLSEREGRRLFQQLIDGVSYCHGKGVYHRDLK
[9] [3] [2]
2.7e-12 2.9e-22 2.6e-26
PENFLLDENGNLKVCDFGLSA DGLFHTTCGTPYYVAPEVLSR YYGPEADVWSCGVILYILLCGYPP
+++++ + +++++++++++++ +++++++++++++++++++++ +++ ++++++++++++++ + ++
151 PENVLIDRKGNIKISDFGLCALPQHLGKDGLLHTTCGSPNYIAPEVLQNRGYDGSLSDIWSCGVILYIMLIGQLP
[5]
4e-17
FWDEN MLDPNPMTRITIHQILCHPWF
+++++ ++ +++++++ +++++ ++++
226 FDDRNMVVLYQKIFKGDTKIPEWLSPGAQNLLKRILEPNPMKRINMAEIKLHEWFQKDYIPVGPYDDDDEDLRLG
HORVU.MOREX.r3.3HG0242960.1.V3
LENGTH = 511 COMBINED P-VALUE = 9.31e-128 E-VALUE = 7.5e-126
DIAGRAM: 21-[6]-7-[10]-8-[4]-10-[1]-[9]-7-[3]-2-[2]-29-[5]-231
[6] [10]
8.0e-32 2.0e-1
LMGRYELGRTLGQGQFGKTYLCRHKATGQKVACKSIDKRKV QVRREI
++++ +++++++++++++++ +++ ++++++++++++++++ ++++++
1 MARMASKGASGREREAGKKALLLGRFEVGRMLGQGNFAKVYQARNVATGEEVAIKVIEKEKVFKSGLTAHIKREI
[4] [1]
2 1.1e-20 1.4e-31
QIMRHLRHH METKTKIYIVMEYCEGGELFDRI RRYFQQIISVVDYCHSMGVYHRDLK
+ +++++++ ++++ +++++++++++++++ ++ +++++++++++++++++++++++ +
76 AALRRVRHPHIVQLYEVMATKLRIYFVMEYVRGGELFARVAKGPLPEAEARRYFQQLVSAVAFCHARGVYHRDIK
[9] [3] [2]
1.1e-13 6.1e-23 2.7e-25
PENFLLDENGNLKVCDFGLSA DGLFHTTCGTPYYVAPEVLSR YYGPEADVWSCGVILYILLCGYPP
++++++++++ ++++++++++ ++++++ ++++++++++++++ ++ ++++ +++++ ++++ +++++
151 PENLLVDDAGDLKVSDFGLSAVAEQMRHDGLFHTFCGTPAYVAPEVLSRRGYDAAKADLWSCGVVLFVLGAGYLP
[5]
5e-12
FWDEN MLDPNPMTRITIHQILCHPWF
+++++ +++ + ++ ++++++ +++
226 FQDRNLVGMYRKIHRGDFRCPKWFSPELLRLMHRVLDTKPPRRATVDEIMDNEWFKVGFRRFSFRIEDDRSFTCF
HORVU.MOREX.r3.1HG0082030.1.V3
LENGTH = 500 COMBINED P-VALUE = 3.57e-127 E-VALUE = 2.9e-125
DIAGRAM: 9-[6]-7-[10]-8-[4]-11-[1]-[9]-4-[3]-2-[2]-29-[5]-234
[6] [10]
6.3e-27 1.8e-12
LMGRYELGRTLGQGQFGKTYLCRHKATGQKVACKSIDKRKV QVRREIQIMRHLRHH
++ ++++++++ ++++++++++++ +++++++++++++++ +++++++++++ ++
1 MDAAGRDANPLAGYRIGKTLGIGSFGKVKIAEHIITGHKVAIKILNRRKIKSMEMEEKVKREIKILRLFMHPHII
[4] [1] [9]
2.8e-18 2.3e-32 1.6e-
METKTKIYIVMEYCEGGELFDRI RRYFQQIISVVDYCHSMGVYHRDLKPENFLLDENGN
+ ++ +++++++++ +++++++ ++++++++++++++++++++++++++++++++++++
76 RLYEVIDTPADIYVVMEYVKSGELFDYIVEKGRLQEEEARRFFQQIISGVEYCHRNMVVHRDLKPENLLLDSKCN
[3] [2]
12 7.6e-19 2.0e-29
LKVCDFGLSA DGLFHTTCGTPYYVAPEVLSR YYGPEADVWSCGVILYILLCGYPPFWDEN
++++++++++ +++++++++++++++++++++ + +++++++++++++++++++++++++++
151 VKIADFGLSNVMRDGHFLKTSCGSPNYAAPEVISGKLYAGPEVDVWSCGVILYALLCGTLPFDDENIPNLFKKIK
[5]
1e-18
MLDPNPMTRITIHQILCHPWF
++++++++++++ +++++ ++
226 GGIYTLPSHLSPLARDLIPRMLVVDPMKRITIREIREHSWFKARLPRYLAVPPPDTAQQVKKLDDETLNDVIKMG
HORVU.MOREX.r3.5HG0438740.1.V3
LENGTH = 357 COMBINED P-VALUE = 8.13e-127 E-VALUE = 6.6e-125
DIAGRAM: 13-[6]-3-[10]-8-[4]-11-[1]-2-[9]-4-[3]-2-[2]-35-[5]-83
[6] [10]
1.3e-25 1.1e-13
LMGRYELGRTLGQGQFGKTYLCRHKATGQKVACKSIDKRKV QVRREIQIMRHLRHH
+++++ + ++++++++ ++++++++++ +++++++++ +++++++++++++++
1 MERGTMGDVPVMLDGDRYELVRSIGSGNFGVARLMRNRASGELVAVKYIDRGEKIDENVQREIINHRSLRHPNII
[4] [1] [9]
1.1e-20 5.3e-32 3.0
METKTKIYIVMEYCEGGELFDRI RRYFQQIISVVDYCHSMGVYHRDLKPENFLL DEN
+++++++ +++++++++++++++ +++++++++++++++++++++++++++++++ +++
76 RFKEVILTPTHLAIVMEYASGGELFDRICTAGRFSVDEARFFFQQLISGVSYCHSMQVCHRDLKLENTLLDGSTT
[3] [2]
e-12 1.6e-17 1.3e-26
GNLKVCDFGLSA DGLFHTTCGTPYYVAPEVLSR YYGPEADVWSCGVILYILLCGYPPFWDEN
++++++++++++ +++++++++++++++++++ + ++++ +++++++++++++++++++++++
151 PRLKICDFGYSKSSVLHSQPKSTVGTPAYIAPEVLIKKEYDGKIADVWSCGVTLYVMLVGAYPFEDPENPKNFKM
[5]
2.7e-20
MLDPNPMTRITIHQILCHPWF
+++ +++++++++++++++++
226 TIQKILGVQYSIPDYIHIPMDCRNLLSRIFVANPATRITIPEIKNHPWFLKNLPADLMDGPTVSNQYEEPDQPMQ
HORVU.MOREX.r3.2HG0121170.1.V3
LENGTH = 451 COMBINED P-VALUE = 7.03e-125 E-VALUE = 5.7e-123
DIAGRAM: 8-[6]-7-[10]-8-[4]-11-[1]-[9]-7-[3]-2-[2]-29-[5]-183
[6] [10]
5.8e-30 8.4e-11
LMGRYELGRTLGQGQFGKTYLCRHKATGQKVACKSIDKRKV QVRREIQIMRHLRHH
++++++++++++++ +++++++++++++++++++++++ ++ +++ +++++++++++
1 MAATEGAMRMGKYEMGRTLGEGHFGKVRLARHADTGRPFAIKILDRQRILAMKIDEQIKTEIATLKLLKHPNVVR
[4] [1] [9]
2.2e-19 2.9e-30 5.2e-1
METKTKIYIVMEYCEGGELFDRI RRYFQQIISVVDYCHSMGVYHRDLKPENFLLDENGNL
++++++++++++++++++++++ +++++++++++++++ +++++++++++++++++++++
76 LYEVAASKTKIYMVLEYVNGGELFEKIALKGKLPEKEGRKLFQQLMDAVSYCHERGVYHRDLKPENVLVDAKGNI
[3] [2]
4 9.9e-22 4.7e-27
KVCDFGLSA DGLFHTTCGTPYYVAPEVLSR YYGPEADVWSCGVILYILLCGYPPFWDEN
+++++++++ +++++++++++++++++++ + +++ ++++++++++++++ + +++++++
151 KVSDFGLSALPQHQRKDGLLHTTCGSPNYIAPEVLLNKGYDGSMSDVWSCGVILYVMLTGNLPFDDENMVVLYQK
[5]
1e-13
MLDPNPMTRITIHQILCHPWF
++++++ +++ ++ ++ + ++
226 ILKGDYRIPKWLSPGAQDILRKLLDPNPITRLGMDGMRAHDWFNQCYTPAVPFDDDDDNYVGDDNSHMTKHNGIQ
HORVU.MOREX.r3.3HG0264740.1.V3
LENGTH = 449 COMBINED P-VALUE = 1.70e-124 E-VALUE = 1.4e-122
DIAGRAM: 11-[6]-7-[10]-8-[4]-11-[1]-[9]-5-[3]-2-[2]-29-[5]-180
[6] [10]
5.8e-28 2.0e-15
LMGRYELGRTLGQGQFGKTYLCRHKATGQKVACKSIDKRKV QVRREIQIMRHLRHH
++++++++++++++++++++++++++++++++++++++ + +++++++++++++++
1 MVGGGGGGALRRVGKYEVGRTIGEGTFAKVKFAQNTETGESVAMKVLDRSSILKHKMVDQIKREISIMKLVRHPN
[4] [1] [9]
8.8e-17 1.4e-33 7.9
METKTKIYIVMEYCEGGELFDRI RRYFQQIISVVDYCHSMGVYHRDLKPENFLLDEN
+++++++++++++ +++++++++ ++++++++++++++++++++++++++++++++++
76 VVRLHEVLASRKRIFIILEFITGGELFDKIIRHGRLGEADARKYFQQLIDGVDFCHSKGVYHRDLKPENLLLDSQ
[3] [2]
e-15 3.5e-18 4.1e-26
GNLKVCDFGLSA DGLFHTTCGTPYYVAPEVLSR YYGPEADVWSCGVILYILLCGYPPFWDEN
++++++++++++ ++ ++++++++++++++++ ++++ ++ ++++++++++++++++++ +
151 GNLKISDFGLSAWPAQGAALLRTTCGTPNYVAPEVLSHKGYDGALADTWSCGVILYVLLAGYLPFDEVDLTTLYG
[5]
1.3e-14
MLDPNPMTRITIHQILCHPWF
++++ + +++ ++++++++++
226 KIESAEYSFPAVFPSGAKSLIRRILDPSPDTRIRIDEIRKDEWFKKNYEPVREVENEEVNLDDVNAAFDDPEEDS
HORVU.MOREX.r3.4HG0342860.1.V3
LENGTH = 361 COMBINED P-VALUE = 3.22e-124 E-VALUE = 2.6e-122
DIAGRAM: 18-[6]-3-[10]-8-[4]-11-[1]-2-[9]-4-[3]-2-[2]-35-[5]-82
[6] [10]
1.2e-24 1.1e-13
LMGRYELGRTLGQGQFGKTYLCRHKATGQKVACKSIDKRKV QVRREIQIMRHLR
+++++ + ++++++++ +++++++ ++ +++++++++ +++++++++++++
1 MDRAALTVGPGMDMPIMHDGDRYELVKDIGSGNFGVARLMRNRADGQLVAVKYIERGEKIDENVQREIINHRSLR
[4] [1]
1.4e-19 6.1e-31
HH METKTKIYIVMEYCEGGELFDRI RRYFQQIISVVDYCHSMGVYHRDLKPENFLL
++ +++++++ +++++++++++++++ +++++++++++++++++++++++++++++++
76 HPNIIRFKEVILTPTHLAIVMEYASGGELFERICNAGRFSEDEARFFFQQLLSGVSYCHSMQVCHRDLKLENTLL
[9] [3] [2]
2.2e-12 4.8e-18 3.7e-27
DENGNLKVCDFGLSA DGLFHTTCGTPYYVAPEVLSR YYGPEADVWSCGVILYILLCGYPPFWDEN
+++++++++++++++ +++++++++++++++++++ + ++++ ++++++++++++++++++++++++
151 DGSTAPRLKICDFGYSKSSVLHSQPKSTVGTPAYIAPEVLLKKEYDGKIADVWSCGVTLYVMLVGAYPFEDPDEP
[5]
5.3e-20
MLDPNPMTRITIHQILCHPWF
+++ +++++++++++++++++
226 KNFRKTIQRILSVQYSIPDYVHISSECRDLIAKIFVGNPATRITIPEIRNHPWFLKNLPADLVDDSTMSSQYEEP
HORVU.MOREX.r3.3HG0320770.1.V3
LENGTH = 392 COMBINED P-VALUE = 8.29e-122 E-VALUE = 6.7e-120
DIAGRAM: 12-[6]-7-[10]-11-[4]-11-[1]-[9]-4-[3]-2-[2]-29-[5]-24-[10]-81
[6] [10]
3.0e-29 1.5e-08
LMGRYELGRTLGQGQFGKTYLCRHKATGQKVACKSIDKRKV QVRREIQIMRHLRHH
++++++++++++ ++++ ++ ++++ +++++++++++++++ +++++++++
1 MDGNNRGGGHSEVLKNYNLGKTLGLGTFGDVKVAEHKLTGQRVAIKILNRRKMETMEMEEKANREIKILRLFIDF
[4] [1]
3.1e-18 5.6e-30
METKTKIYIVMEYCEGGELFDRI RRYFQQIISVVDYCHSMGVYHRDLKPENFL
+++++++++++++++ +++++++ ++++++++++++++++++++++++++++++
76 IHPHIIRVYEVIETPKNIFVVMEHCNNGELLDYIIENGRLQEDEARRMFQQIIGGVEHCHRNMVVHRDLKPENLL
[9] [3] [2]
5.4e-12 1.9e-17 2.3e-28
LDENGNLKVCDFGLSA DGLFHTTCGTPYYVAPEVLSR YYGPEADVWSCGVILYILLCGYPPFWDEN
++++++++++++++++ ++++++++++ ++++++++++ + ++++++++++++++++++++ ++++++
151 LDSKYNVKLADFGLSNVMHDGHFLKTSCGSLNYAAPEVISGKYYAGPEVDVWSCGVILYALLCGSVPFDDDNIPS
[5] [10]
8.8e-20 3.0e
MLDPNPMTRITIHQILCHPWF QVRR
+++ ++++++++++++ ++++ ++ +
226 LFRKIKGGTYILPSYLSDSARDLIPKLLNIDPMKRITIHEIRVHPWFKNHLPCYLAVPPPYKAQQAKMIDEDILR
-8
EIQIMRHLRHH
++ ++ + +
301 EVVNLGYDKDHVCESLWNRLQNEETVAYYLLLDNRFRSTSGYLGADRQHLMDRSFNEFTLSESASPSTRNYLPGI
HORVU.MOREX.r3.5HG0512820.1.V3
LENGTH = 366 COMBINED P-VALUE = 3.11e-119 E-VALUE = 2.5e-117
DIAGRAM: 23-[6]-3-[10]-8-[4]-11-[1]-2-[9]-4-[3]-2-[2]-35-[5]-82
[6] [10]
3.0e-24 2.9e-13
LMGRYELGRTLGQGQFGKTYLCRHKATGQKVACKSIDKRKV QVRREIQI
+++++ + ++++++++ ++++++++ + +++++++++ ++++++++
1 MAGAAPDRAALTVGPGMDMPIMHDSDRYELVRDIGSGNFGVARLMRDRRTMELVAVKYIERGEKIDENVQREIIN
[4] [1]
1.4e-19 2.8e-32
MRHLRHH METKTKIYIVMEYCEGGELFDRI RRYFQQIISVVDYCHSMGVYHRDLKP
+++++++ +++++++ +++++++++++++++ ++++++++++++++++++++++++++
76 HRSLKHPNIIRFKEVILTPTHLAIVMEYASGGELFERICKNIRFSEDEARYFFQQLISGVSYCHSMQVCHRDLKL
[9] [3] [2]
2.5e-12 4.8e-18 9.0e-26
ENFLL DENGNLKVCDFGLSA DGLFHTTCGTPYYVAPEVLSR YYGPEADVWSCGVILYILLCGYPPFW
+++++ +++++++++++++++ +++++++++++++++++++ + ++++ +++++++++++++++++++++
151 ENTLLDGSPAPRLKICDFGYSKSSVLHSQPKSTVGTPAYIAPEVLLKKEYDGKIADVWSCGVTLYVMVVGAYPFE
[5]
9.4e-16
DEN MLDPNPMTRITIHQILCHPWF
++ +++ +++ ++++++++++ ++
226 DPEEPKNFRKTIQRILSVQYSIPDNVDISPECRHLISRIFVGDPALRITIPEIRSHNWFLKNLPADLMDDDSMSS
HORVU.MOREX.r3.3HG0320810.1.V3
LENGTH = 513 COMBINED P-VALUE = 4.08e-119 E-VALUE = 3.3e-117
DIAGRAM: 12-[6]-7-[10]-11-[4]-11-[1]-[9]-4-[3]-2-[2]-29-[5]-24-[10]-202
[6] [10]
3.0e-29 3.6e-09
LMGRYELGRTLGQGQFGKTYLCRHKATGQKVACKSIDKRKV QVRREIQIMRHLRHH
++++++++++++ ++++ ++ ++++ +++++++++++++++ +++++++++
1 MDGNNRGGGHSEVLKNYNLGKTLGLGTFGDVKVAEHKLTGQRVAIKILNRRKMETMEMEEKANREIKIMRLFIDF
[4] [1]
1.1e-18 1.2e-28
METKTKIYIVMEYCEGGELFDRI RRYFQQIISVVDYCHSMGVYHRDLKPENFL
+++++ +++++++++ +++++++ ++++++++ +++++++ +++++++++++++
76 IHPHIIRVYEVIETPKDIFVVMEYCNNGELLDYIIENGRLQEDEARRIFQQILAGVEYCHRIMVVHRDLKPENLL
[9] [3] [2]
5.4e-12 4.9e-16 2.3e-28
LDENGNLKVCDFGLSA DGLFHTTCGTPYYVAPEVLSR YYGPEADVWSCGVILYILLCGYPPFWDEN
++++++++++++++++ ++++++++++ +++++++++ + ++++++++++++++++++++ ++++++
151 LDSKYNVKLADFGLSNVMRDGHFLKTSCGSLNYAAPEIISSKLYAGPEVDVWSCGVILYALLCGSVPFDDDNIPS
[5] [10]
8.8e-20 3.0e
MLDPNPMTRITIHQILCHPWF QVRR
+++ ++++++++++++ ++++ ++ +
226 LFRKIKGGTYILPSYLSDSARDLIPKLLNIDPMKRITIHEIRVHPWFKNHLPCYLAVPPPYKEQQAKMIDEDILR
-8
EIQIMRHLRHH
++ ++ + +
301 EVVNLGYDKDHVCESLWNRLQNEETVAYYLLLDNRFRSTSGYLGADHQHLMDRSFNEFTLSESASPSTRNYLPGI
HORVU.MOREX.r3.2HG0124380.1.V3
LENGTH = 592 COMBINED P-VALUE = 1.72e-118 E-VALUE = 1.4e-116
DIAGRAM: 136-[6]-7-[10]-9-[4]-12-[1]-3-[9]-4-[3]-[2]-33-[5]-18-[7]-124
[6]
1.9e-06
LMGRYELGRTLGQG
+ +
76 SNTPARRLLRLPFPPPSPAKHIRQALARRHGPSRPAIPEEGDSDGGRGLDKGFGFNKGFAAKYDLGDEVGRGHFG
[10] [4]
3.4e-12 2.1e-21
QFGKTYLCRHKATGQKVACKSIDKRKV QVRREIQIMRHLRHH METKTKIYIVMEYCEGG
++ + ++ +++++++++++ ++ ++++++++++ ++++ +++ ++++++++++++
151 YTCAAKIRKGARKGDAVAVKVIPKAKMTTSIAIEDVRREVKILKALAGHKNLVQFYDAYEDNEKVYIVMELCEGG
[1] [9] [3]
5.0e-26 2.6e-13 6.8e
ELFDRI RRYFQQIISVVDYCHSMGVYHRDLKPENFLL DENGNLKVCDFGLSA DGLF
++++++ + + ++++++++++ +++++++++++++++ ++++ ++++++++++ ++++
226 ELLDRILSRGGKYSEDDAKSVLVQILNVVAFCHIQGVVHRDLKPENFLFTSKDENSQLKTIDFGLSDFVKPDERL
[2]
-19 1.8e-25
HTTCGTPYYVAPEVLSRYYGPEADVWSCGVILYILLCGYPPFWDEN
+++++++++++++++++++ +++++++++++ +++++++ ++++++
301 NDIVGSAYYVAPEVLHRCYSTEADVWSIGVIAYILLCGSRPFWARTESGIFRSVLKADPSYNEAPWPSLTPEAMD
[5] [7]
6.8e-16 3.9e-25
MLDPNPMTRITIHQILCHPWF KQFSAMNKFKKMALRVIAECLSEEEIAGLKEM
++++++++++++++++ ++++ + ++ +++ +++++++ +++++ ++++++ +
376 FVKRLLCKDPRRRMTAAQALGHPWIRNYNDIKMPLDVLIFRLIKAYIRSSSLCKAALKALSKTLTVDELFYLKGQ
FKMMDTDNSGTITYEELK
+ ++ ++ +++++++ +
451 FSLLEPDRNGCITLDNIRMALTREATDAMKETRVQEILVSLSALQYRRMDFHEFCAAAVSVHQLEALDRWEQHAR
HORVU.MOREX.r3.1HG0057490.1.V3
LENGTH = 341 COMBINED P-VALUE = 2.66e-117 E-VALUE = 2.2e-115
DIAGRAM: [6]-3-[10]-8-[4]-11-[1]-2-[9]-4-[3]-2-[2]-35-[5]-80
[6] [10] [4]
1.4e-22 1.1e-13 2.2e-19
LMGRYELGRTLGQGQFGKTYLCRHKATGQKVACKSIDKRKV QVRREIQIMRHLRHH METKTKIY
++++ ++++ +++++ ++ +++++ + ++++++++++ +++++++++++++++ + +++++
1 MEERYEALKELGTGNFGVARLVRDKRTKELVAVKYIERGKKIDENVQREIINHRSLRHPNIIRFKEVCVTPTHLA
[1] [9]
1.0e-28 1.7e-11
IVMEYCEGGELFDRI RRYFQQIISVVDYCHSMGVYHRDLKPENFLL DENGNLKVCDFGLSA
+++++++++++++++ +++++++++++++++++ +++++++++++++ +++++++++++++++
76 IVMEYAAGGELFERICTAGRFSEDEARYFFQQLLSGVSYCHSMEICHRDLKLENTLLDGSPTPRVKICDFGYSKS
[3] [2]
1.1e-18 3.6e-26
DGLFHTTCGTPYYVAPEVLSR YYGPEADVWSCGVILYILLCGYPPFWDEN
+++++++++++++++++++++ ++++ ++++++++++++++ ++++++++
151 ALLHSKPKSTVGTPAYIAPEVLSRKEYDGKVADVWSCGVTLYVMLIGSYPFEDPEDPRNFRKTISRILGVQYSIP
[5]
2.5e-15
MLDPNPMTRITIHQILCHPWF
++ +++++++++++++ +++
226 DYVRVSSDCRRLLSQIFTADPSKRITIAEIKKLPWYLKSLPKEIAERDRANFKEPEKATETAASAAQPVEEIMRI
HORVU.MOREX.r3.1HG0075630.1.V3
LENGTH = 382 COMBINED P-VALUE = 8.73e-117 E-VALUE = 7.1e-115
DIAGRAM: 21-[6]-3-[10]-8-[4]-11-[1]-2-[9]-4-[3]-2-[2]-35-[5]-100
[6] [10]
6.0e-21 5.9e-13
LMGRYELGRTLGQGQFGKTYLCRHKATGQKVACKSIDKRKV QVRREIQIMR
+++++ + ++++++++ ++++++++ ++++ +++++ ++ +++ +++
1 MTTATATETGTAAALNETARAGMDKYEEVRDIGSGNFGVARLMRNRDNDGLVAVKLIERGHRIDENVYREIVNHR
[4] [1]
5.2e-21 1.2e-29
HLRHH METKTKIYIVMEYCEGGELFDRI RRYFQQIISVVDYCHSMGVYHRDLKPEN
+++++ +++++++ +++++++++++++++ ++++++++++++++++++++++++++++
76 SLRHPNIIQFIEVILTPTHLAIVMEYAAGGELFDRIVDRGRFSEDEARYFFQQLICGVSYCHHMQICHRDLKLEN
[9] [3] [2]
2.5e-12 2.5e-16 4.2e-27
FLL DENGNLKVCDFGLSA DGLFHTTCGTPYYVAPEVLSR YYGPEADVWSCGVILYILLCGYPPFWDE
+++ +++++++++++++++ ++++++++++++++++ ++++ ++++ +++++++++++++++++++++++
151 VLLDGSPAPRLKICDFGYSKSSVLHSRPKSAVGTPAYIAPDVLCRREYDGKLADVWSCGVTLYVMLVGAYPFEDP
[5]
2.8e-18
N MLDPNPMTRITIHQILCHPWF
+ +++ ++++++++ ++++++++
226 DDPKNIKKTIQRIAAVDYKIPDNILISAECRQLISLIFVSNPTKRITMKEIKSHPWFLKNLPRELTDEAQSAYYT
HORVU.MOREX.r3.6HG0569870.1.V3
LENGTH = 443 COMBINED P-VALUE = 1.03e-116 E-VALUE = 8.4e-115
DIAGRAM: 5-[6]-7-[10]-8-[4]-11-[1]-[9]-5-[3]-2-[2]-29-[5]-180
[6] [10]
3.0e-26 3.1e-12
LMGRYELGRTLGQGQFGKTYLCRHKATGQKVACKSIDKRKV QVRREIQIMRHLRHH
++++++++++++ ++++++++++++++ ++++++++ ++ ++++++ ++++ ++
1 MVLAESIGKYRVGRTIGEGAFAKVRLAVDAETGRCVAVKVIDRSTVLRNNLMYQVKREIGAMKLLNHPNIVKIHE
[4] [1] [9]
[truncated: 498 more rows]

## Sheet: Sheet 5
Sheet 5. Conserved motif of late embryogenesis abundant (LEA)
MOTIFS meme.xml (peptide)
MOTIF ID ALT ID WIDTH BEST POSSIBLE MATCH
----- -------------------------------------------------- ------- ----- -------------------
1 LSVTLTVTVAVRNPN MEME-1 15 LNYNLQVTVMIRNPN
2 AALIVYLVLRPRKPRFSVQSA MEME-2 21 IILIFWLVFRPRKPRFYLQSL
3 GTGEKKGIMDKIKEKLPGQH MEME-3 20 GTGEKKGIMDKIKEKLPGQH
4 EDDGMGGRRKKGIKEKIKEKL MEME-4 21 EDDGMGGRRKKGMKEKIKEKL
5 GRVRWKVGSWVSGHYHLRVSC MEME-5 21 GRVRWKVGSWISGWYHLFVNC
6 AASLPPFYQGHRNVTVVSVVL MEME-6 21 DGSWPPFYQPHRNWTVWSPRM
7 EKTEAATARSHDEKELAHERGKAKVAAAEAELHQEKVEHREEAMEHRLHK MEME-7 50 EKTEAATARSHDEKEMAHERGKAKVAQAEAELHQEKVEHREEAMEHRLHK
8 ILHRSGSSSSSS MEME-8 12 ILHRSGSSSSSS
9 GQHGHATBRVDEYGNPVAGHG MEME-9 21 QQHGHPDNRVDEYGNPVAGHG
10 RVGIYYDRLDAYVSYRGEPVG MEME-10 21 RVGIYYDRLDCYVSYRGEQIC
PAIRWISE MOTIF CORRELATIONS:
MOTIF 1 2 3 4 5 6 7 8 9
----- ----- ----- ----- ----- ----- ----- ----- ----- -----
2 0.29
3 0.17 0.07
4 0.14 0.04 0.58
5 0.21 0.22 0.14 0.13
6 0.21 0.15 0.08 0.09 0.12
7 0.22 0.16 0.21 0.24 0.26 0.25
8 0.20 0.26 0.15 0.11 0.24 0.28 0.35
9 0.11 0.12 0.21 0.12 0.10 0.11 0.17 0.13
10 0.35 0.24 0.07 0.09 0.21 0.14 0.18 0.23 0.20
No overly similar pairs (correlation > 0.60) found.
Random model letter frequencies (from non-redundant database):
A 0.073 C 0.018 D 0.052 E 0.062 F 0.040 G 0.069 H 0.022 I 0.056 K 0.058
L 0.092 M 0.023 N 0.046 P 0.051 Q 0.041 R 0.052 S 0.074 T 0.059 V 0.064
W 0.013 Y 0.033
********************************************************************************
********************************************************************************
SECTION I: HIGH-SCORING SEQUENCES
********************************************************************************
- Each of the following 82 sequences has E-value less than 10.
- The E-value of a sequence is the expected number of sequences
in a random database of the same size that would match the motifs as
well as the sequence does and is equal to the combined p-value of the
sequence times the number of sequences in the database.
- The combined p-value of a sequence measures the strength of the
match of the sequence to all the motifs and is calculated by
o finding the score of the single best match of each motif
to the sequence (best matches may overlap),
o calculating the sequence p-value of each score,
o forming the product of the p-values,
o taking the p-value of the product.
- The sequence p-value of a score is defined as the
probability of a random sequence of the same length containing
some match with as good or better a score.
- The score for the match of a position in a sequence to a motif
is computed by by summing the appropriate entry from each column of
the position-dependent scoring matrix that represents the motif.
- Sequences shorter than one or more of the motifs are skipped.
- The table is sorted by increasing E-value.
********************************************************************************
SEQUENCE NAME DESCRIPTION E-VALUE LENGTH
------------- ----------- -------- ------
HORVU.MOREX.r3.6HG0622790.1.V3 1.5e-65 191
HORVU.MOREX.r3.6HG0622770.1.V3 1.6e-63 155
HORVU.MOREX.r3.5HG0458100.1.V3 3.1e-63 208
HORVU.MOREX.r3.7HG0749500.1.V3 3.7e-61 211
HORVU.MOREX.r3.5HG0516830.1.V3 7.7e-61 146
HORVU.MOREX.r3.6HG0622760.1.V3 1.8e-60 205
HORVU.MOREX.r3.2HG0135210.1.V3 2.1e-58 215
HORVU.MOREX.r3.5HG0507410.1.V3 5.5e-57 139
HORVU.MOREX.r3.3HG0305460.1.V3 1e-56 295
HORVU.MOREX.r3.5HG0527260.1.V3 2.2e-55 216
HORVU.MOREX.r3.2HG0213800.1.V3 1.6e-54 220
HORVU.MOREX.r3.4HG0339950.1.V3 2.6e-54 486
HORVU.MOREX.r3.5HG0507390.1.V3 2.1e-53 141
HORVU.MOREX.r3.7HG0707700.1.V3 4.1e-51 216
HORVU.MOREX.r3.2HG0167300.1.V3 9.5e-49 216
HORVU.MOREX.r3.3HG0283230.1.V3 4.8e-46 232
HORVU.MOREX.r3.6HG0548110.1.V3 6.7e-46 141
HORVU.MOREX.r3.7HG0644010.1.V3 6.8e-45 90
HORVU.MOREX.r3.7HG0644030.1.V3 2.2e-43 86
HORVU.MOREX.r3.7HG0642100.1.V3 5.1e-40 94
HORVU.MOREX.r3.7HG0637810.1.V3 1.5e-39 117
HORVU.MOREX.r3.1HG0060220.1.V3 4.6e-33 262
HORVU.MOREX.r3.6HG0622690.1.V3 6.5e-31 204
HORVU.MOREX.r3.2HG0139280.1.V3 1.5e-30 202
HORVU.MOREX.r3.1HG0055610.1.V3 2.6e-30 208
HORVU.MOREX.r3.2HG0213820.1.V3 2.2e-29 207
HORVU.MOREX.r3.5HG0446860.1.V3 3e-29 208
HORVU.MOREX.r3.2HG0197000.1.V3 5e-28 113
HORVU.MOREX.r3.5HG0498820.1.V3 6.3e-28 263
HORVU.MOREX.r3.7HG0707750.1.V3 2.6e-27 213
HORVU.MOREX.r3.6HG0602880.1.V3 7.2e-26 254
HORVU.MOREX.r3.5HG0458120.1.V3 1.4e-25 205
HORVU.MOREX.r3.6HG0602250.1.V3 1.6e-25 195
HORVU.MOREX.r3.3HG0267250.1.V3 4.7e-25 288
HORVU.MOREX.r3.2HG0197010.1.V3 2.9e-24 110
HORVU.MOREX.r3.3HG0300120.1.V3 9.6e-22 241
HORVU.MOREX.r3.2HG0209950.1.V3 1.5e-21 252
HORVU.MOREX.r3.4HG0350830.1.V3 3.2e-21 300
HORVU.MOREX.r3.1HG0046460.1.V3 3.4e-21 266
HORVU.MOREX.r3.2HG0124050.1.V3 4e-20 262
HORVU.MOREX.r3.2HG0198570.1.V3 7.8e-20 211
HORVU.MOREX.r3.1HG0031210.1.V3 8.1e-20 282
HORVU.MOREX.r3.3HG0296120.1.V3 8.5e-19 292
HORVU.MOREX.r3.6HG0622710.1.V3 1.1e-18 575
HORVU.MOREX.r3.6HG0560670.1.V3 1.5e-18 203
HORVU.MOREX.r3.4HG0390200.1.V3 1e-16 241
HORVU.MOREX.r3.4HG0356870.1.V3 4.2e-16 271
HORVU.MOREX.r3.5HG0463010.1.V3 2e-15 278
HORVU.MOREX.r3.2HG0140430.1.V3 2.1e-15 191
HORVU.MOREX.r3.5HG0481100.1.V3 3.6e-15 258
HORVU.MOREX.r3.1HG0070590.1.V3 9.4e-15 206
HORVU.MOREX.r3.2HG0168560.1.V3 1.4e-14 333
HORVU.MOREX.r3.2HG0140450.1.V3 1.6e-14 199
HORVU.MOREX.r3.7HG0648340.1.V3 1.7e-14 235
HORVU.MOREX.r3.2HG0096290.1.V3 2.4e-14 227
HORVU.MOREX.r3.5HG0470600.1.V3 3.4e-14 209
HORVU.MOREX.r3.3HG0287240.1.V3 4.8e-14 254
HORVU.MOREX.r3.7HG0689310.1.V3 1.4e-12 202
HORVU.MOREX.r3.2HG0140470.1.V3 1.5e-12 192
HORVU.MOREX.r3.3HG0248640.1.V3 4.5e-12 569
HORVU.MOREX.r3.3HG0315640.1.V3 1.6e-11 204
HORVU.MOREX.r3.5HG0530290.1.V3 2.2e-11 219
HORVU.MOREX.r3.7HG0683720.1.V3 2.4e-11 219
HORVU.MOREX.r3.6HG0569090.1.V3 4.8e-10 220
HORVU.MOREX.r3.4HG0335550.1.V3 5.2e-10 235
HORVU.MOREX.r3.4HG0364700.1.V3 8.1e-10 175
HORVU.MOREX.r3.4HG0353320.1.V3 7.8e-09 232
HORVU.MOREX.r3.6HG0602570.1.V3 9.5e-09 336
HORVU.MOREX.r3.1HG0082740.1.V3 4.2e-08 253
HORVU.MOREX.r3.5HG0528290.1.V3 3.6e-07 252
HORVU.MOREX.r3.5HG0424150.1.V3 0.00022 136
HORVU.MOREX.r3.5HG0532580.1.V3 0.00024 327
HORVU.MOREX.r3.5HG0424060.1.V3 0.0003 223
HORVU.MOREX.r3.6HG0558740.1.V3 0.0013 207
HORVU.MOREX.r3.2HG0199510.1.V3 0.0014 221
HORVU.MOREX.r3.3HG0233660.1.V3 0.0063 309
HORVU.MOREX.r3.6HG0592430.1.V3 1 98
HORVU.MOREX.r3.4HG0403120.1.V3 1.3 462
HORVU.MOREX.r3.7HG0675510.1.V3 1.7 80
HORVU.MOREX.r3.3HG0273460.1.V3 4.7 181
HORVU.MOREX.r3.5HG0470900.1.V3 7.6 175
HORVU.MOREX.r3.3HG0257070.1.V3 9.6 419
********************************************************************************
********************************************************************************
SECTION II: MOTIF DIAGRAMS
********************************************************************************
- The ordering and spacing of all non-overlapping motif occurrences
are shown for each high-scoring sequence listed in Section I.
- A motif occurrence is defined as a position in the sequence whose
match to the motif has POSITION p-value less than 0.0001.
- The POSITION p-value of a match is the probability of
a single random subsequence of the length of the motif
scoring at least as well as the observed match.
- For each sequence, all motif occurrences are shown unless there
are overlaps. In that case, a motif occurrence is shown only if its
p-value is less than the product of the p-values of the other
(lower-numbered) motif occurrences that it overlaps.
- The table also shows the E-value of each sequence.
- Spacers and motif occurences are indicated by
o -d- `d' residues separate the end of the preceding motif
occurrence and the start of the following motif occurrence
o [n] occurrence of motif `n' with p-value less than 0.0001.
********************************************************************************
SEQUENCE NAME E-VALUE MOTIF DIAGRAM
------------- -------- -------------
HORVU.MOREX.r3.5HG0458100.1.V3 3.1e-63 33-[2]-13-[1]-1-[10]-1-[6]-31-[5]-30
HORVU.MOREX.r3.7HG0749500.1.V3 3.7e-61 33-[2]-13-[1]-1-[10]-1-[6]-31-[5]-33
HORVU.MOREX.r3.2HG0135210.1.V3 2.1e-58 33-[2]-11-[1]-1-[10]-1-[6]-31-[5]-39
HORVU.MOREX.r3.5HG0507410.1.V3 5.5e-57 4-[9]-31-[8]-1-[4]-28-[3]-1
HORVU.MOREX.r3.5HG0527260.1.V3 2.2e-55 33-[2]-11-[1]-1-[10]-1-[6]-31-[5]-40
HORVU.MOREX.r3.2HG0213800.1.V3 1.6e-54 37-[2]-14-[1]-1-[10]-1-[6]-32-[5]-36
HORVU.MOREX.r3.4HG0339950.1.V3 2.6e-54 6-[9]-16-[9]-274-[8]-3-[4]-32-[3]-39-[3]-1
HORVU.MOREX.r3.5HG0507390.1.V3 2.1e-53 4-[9]-32-[8]-1-[4]-29-[3]-1
HORVU.MOREX.r3.7HG0707700.1.V3 4.1e-51 33-[2]-14-[1]-1-[10]-1-[6]-31-[5]-37
HORVU.MOREX.r3.2HG0167300.1.V3 9.5e-49 32-[2]-11-[1]-1-[10]-1-[6]-31-[5]-41
HORVU.MOREX.r3.7HG0644010.1.V3 6.8e-45 27-[7]-13
HORVU.MOREX.r3.7HG0644030.1.V3 2.2e-43 27-[7]-9
HORVU.MOREX.r3.7HG0642100.1.V3 5.1e-40 27-[7]-17
HORVU.MOREX.r3.7HG0637810.1.V3 1.5e-39 27-[7]-40
HORVU.MOREX.r3.1HG0060220.1.V3 4.6e-33 65-[2]-29-[1]-1-[10]-1-[6]-34-[5]-33
HORVU.MOREX.r3.6HG0622690.1.V3 6.5e-31 43-[2]-10-[1]-1-[10]-1-[6]-26-[5]-24
HORVU.MOREX.r3.2HG0139280.1.V3 1.5e-30 36-[2]-11-[1]-1-[10]-1-[6]-31-[5]-23
HORVU.MOREX.r3.1HG0055610.1.V3 2.6e-30 30-[2]-18-[1]-1-[10]-4-[6]-31-[5]-25
HORVU.MOREX.r3.2HG0213820.1.V3 2.2e-29 39-[2]-14-[1]-1-[10]-[6]-31-[5]-23
HORVU.MOREX.r3.5HG0446860.1.V3 3e-29 48-[2]-11-[1]-1-[10]-1-[6]-24-[5]-24
HORVU.MOREX.r3.2HG0197000.1.V3 5e-28 27-[7]-36
HORVU.MOREX.r3.5HG0498820.1.V3 6.3e-28 74-[2]-22-[1]-1-[10]-1-[6]-34-[5]-32
HORVU.MOREX.r3.7HG0707750.1.V3 2.6e-27 39-[2]-13-[1]-1-[10]-[6]-32-[5]-29
HORVU.MOREX.r3.6HG0602880.1.V3 7.2e-26 70-[8]-12-[4]-48-[3]-32-[3]-19
HORVU.MOREX.r3.5HG0458120.1.V3 1.4e-25 27-[2]-12-[1]-1-[10]-7-[6]-41-[5]-18
HORVU.MOREX.r3.6HG0602250.1.V3 1.6e-25 31-[2]-12-[1]-[10]-[6]-31-[5]-22
HORVU.MOREX.r3.3HG0267250.1.V3 4.7e-25 88-[2]-12-[1]-1-[10]-[6]-28-[5]-26-[8]-22
HORVU.MOREX.r3.2HG0197010.1.V3 2.9e-24 27-[7]-33
HORVU.MOREX.r3.3HG0300120.1.V3 9.6e-22 65-[2]-19-[1]-[10]-[6]-46-[1]-18
HORVU.MOREX.r3.2HG0209950.1.V3 1.5e-21 83-[2]-13-[1]-1-[10]-[6]-30-[5]-26
HORVU.MOREX.r3.4HG0350830.1.V3 3.2e-21 128-[2]-13-[1]-1-[10]-1-[6]-30-[5]-28
HORVU.MOREX.r3.1HG0046460.1.V3 3.4e-21 96-[2]-12-[1]-23-[6]-30-[5]-27
HORVU.MOREX.r3.2HG0124050.1.V3 4e-20 83-[2]-33-[10]-2-[6]-31-[5]-29
HORVU.MOREX.r3.2HG0198570.1.V3 7.8e-20 43-[2]-9-[1]-1-[10]-56-[5]-24
HORVU.MOREX.r3.1HG0031210.1.V3 8.1e-20 75-[2]-15-[1]-24-[6]-29-[5]-61
HORVU.MOREX.r3.3HG0296120.1.V3 8.5e-19 113-[2]-33-[10]-2-[6]-31-[5]-29
HORVU.MOREX.r3.6HG0560670.1.V3 1.5e-18 24-[2]-13-[1]-1-[10]-7-[6]-80
HORVU.MOREX.r3.4HG0390200.1.V3 1e-16 59-[2]-28-[1]-[10]-[6]-76
HORVU.MOREX.r3.4HG0356870.1.V3 4.2e-16 99-[2]-47-[6]-83
HORVU.MOREX.r3.5HG0463010.1.V3 2e-15 103-[2]-11-[1]-24-[6]-83
HORVU.MOREX.r3.2HG0140430.1.V3 2.1e-15 28-[2]-13-[1]-[10]-[6]-72
HORVU.MOREX.r3.5HG0481100.1.V3 3.6e-15 51-[2]-[8]-10-[1]-[10]-[6]-107
HORVU.MOREX.r3.1HG0070590.1.V3 9.4e-15 36-[2]-17-[1]-[10]-96
HORVU.MOREX.r3.2HG0168560.1.V3 1.4e-14 155-[2]-20-[1]-22-[6]-46-[10]-12
HORVU.MOREX.r3.2HG0140450.1.V3 1.6e-14 23-[2]-19-[1]-[10]-100
HORVU.MOREX.r3.7HG0648340.1.V3 1.7e-14 67-[2]-13-[1]-1-[10]-52-[5]-24
HORVU.MOREX.r3.2HG0096290.1.V3 2.4e-14 63-[2]-13-[1]-1-[10]-[6]-72
HORVU.MOREX.r3.5HG0470600.1.V3 3.4e-14 39-[2]-13-[1]-23-[6]-77
HORVU.MOREX.r3.3HG0287240.1.V3 4.8e-14 81-[2]-19-[1]-[10]-97
HORVU.MOREX.r3.7HG0689310.1.V3 1.4e-12 37-[2]-12-[1]-[10]-96
HORVU.MOREX.r3.2HG0140470.1.V3 1.5e-12 24-[2]-13-[1]-[10]-98
HORVU.MOREX.r3.3HG0248640.1.V3 4.5e-12 397-[2]-20-[1]-1-[10]-[6]-30-[5]-22
HORVU.MOREX.r3.3HG0315640.1.V3 1.6e-11 71-[1]-1-[10]-[6]-57-[8]-6
HORVU.MOREX.r3.5HG0530290.1.V3 2.2e-11 77-[1]-1-[10]-1-[6]-47-[2]-15
HORVU.MOREX.r3.7HG0683720.1.V3 2.4e-11 57-[2]-11-[1]-[10]-[6]-73
HORVU.MOREX.r3.6HG0569090.1.V3 4.8e-10 56-[2]-11-[1]-[10]-96
HORVU.MOREX.r3.4HG0335550.1.V3 5.2e-10 74-[2]-14-[1]-[10]-90
HORVU.MOREX.r3.4HG0364700.1.V3 8.1e-10 10-[8]-11-[1]-1-[10]-69-[2]-15
HORVU.MOREX.r3.4HG0353320.1.V3 7.8e-09 60-[2]-18-[1]-77-[2]-20
HORVU.MOREX.r3.6HG0602570.1.V3 9.5e-09 154-[2]-20-[1]-22-[6]-83
HORVU.MOREX.r3.1HG0082740.1.V3 4.2e-08 32-[9]-29-[2]-8-[1]-[10]-106
HORVU.MOREX.r3.5HG0528290.1.V3 3.6e-07 90-[2]-14-[1]-1-[10]-90
HORVU.MOREX.r3.5HG0424150.1.V3 0.00022 38-[9]-77
HORVU.MOREX.r3.5HG0532580.1.V3 0.00024 26-[3]-38-[1]-111-[1]-102
HORVU.MOREX.r3.5HG0424060.1.V3 0.0003 38-[9]-164
HORVU.MOREX.r3.6HG0558740.1.V3 0.0013 64-[1]-77-[3]-31
HORVU.MOREX.r3.3HG0233660.1.V3 0.0063 19-[4]-23-[1]-111-[1]-105
HORVU.MOREX.r3.6HG0592430.1.V3 1 7-[7]-41
HORVU.MOREX.r3.4HG0403120.1.V3 1.3 175-[9]-51-[7]-64-[7]-5-[4]-25
HORVU.MOREX.r3.7HG0675510.1.V3 1.7 27-[7]-3
HORVU.MOREX.r3.3HG0273460.1.V3 4.7 66-[1]-100
HORVU.MOREX.r3.5HG0470900.1.V3 7.6 [9]-18-[7]-86
HORVU.MOREX.r3.3HG0257070.1.V3 9.6 106-[7]-18-[7]-47-[7]-23-[7]-25
********************************************************************************
********************************************************************************
SECTION III: ANNOTATED SEQUENCES
********************************************************************************
- The positions and p-values of the non-overlapping motif occurrences
are shown above the actual sequence for each of the high-scoring
sequences from Section I.
- A motif occurrence is defined as a position in the sequence whose
match to the motif has POSITION p-value less than 0.0001 as
defined in Section II.
- For each sequence, the first line specifies the name of the sequence.
- The second (and possibly more) lines give a description of the
sequence.
- Following the description line(s) is a line giving the length,
combined p-value, and E-value of the sequence as defined in Section I.
- The next line reproduces the motif diagram from Section II.
- The entire sequence is printed on the following lines.
- Motif occurrences are indicated directly above their positions in the
sequence on lines showing
o the motif number of the occurrence,
o the position p-value of the occurrence,
o the best possible match to the motif, and
o columns whose match to the motif has a positive score (indicated
by a plus sign).
********************************************************************************
HORVU.MOREX.r3.6HG0622790.1.V3
LENGTH = 191 COMBINED P-VALUE = 1.61e-67 E-VALUE = 1.5e-65
[9] [8]
1.8e-26 2.5e-1
QQHGHPDNRVDEYGNPVAGHG ILHRSG
+++++++++++++++++++++ ++++++
1 MEYQGQQQHGQATNRVDEYGNPVAGHGVGTGMGEHGGVGTGMGAHGGVGTGAAAGGHFQPTRKEHKAGGILQRSG
[4]
4 6.2e-26
SSSSSS EDDGMGGRRKKGMKEKIKEKL
++++++ +++++++++++++++++++++
76 SSSSSSSEDDGMGGRRKKGIKDKIKEKLPGGHGDQQHAAGTYGQQGIGMAGTGGTYGQQGHTGMTGTGATGTMAT
[3]
5.8e-26
GTGEKKGIMDKIKEKLPGQH
++++++++++++++++++++
151 GGTYGQPGHTGMTGTGTHGTDGTGEKKGIMDKIKEKLPGQH
HORVU.MOREX.r3.6HG0622770.1.V3
LENGTH = 155 COMBINED P-VALUE = 1.74e-65 E-VALUE = 1.6e-63
[9] [8] [4]
1.3e-24 2.5e-14 6.8e-25
QQHGHPDNRVDEYGNPVAGHG ILHRSGSSSSSS EDDGMGGRRKKGMKE
+++++++++++++++++++++ ++++++++++++ +++++++++++++++
1 MEHGHATNRVDEYGNPVAGHGVGTGMGTGAAAGGHFQPTREEHKAGGILQRSGSSSSSSSEDDGMGGRRKKGLKD
[3]
5.8e-26
KIKEKL GTGEKKGIMDKIKEK
++++++ +++++++++++++++
76 KIKEKLPGGHGDQQQTGGTYGQHGHTGMTGTGEHGATATGGTYGQQGHTGMTGTGAHGTDGTGEKKGIMDKIKEK
LPGQH
+++++
151 LPGQH
HORVU.MOREX.r3.5HG0458100.1.V3
LENGTH = 208 COMBINED P-VALUE = 3.33e-65 E-VALUE = 3.1e-63
DIAGRAM: 33-[2]-13-[1]-1-[10]-1-[6]-31-[5]-30
[2] [1]
1.9e-17 2.6e-12
IILIFWLVFRPRKPRFYLQSL LNYNLQVT
++++++++++++++++ ++++ ++++++++
1 MGKDCGNHGDDHLRNGCRRLLAVLLGLAFIVAIIALIVYLVLRPTHPRFFLQDASLRQLNLSNSSGLLSTSLQVT
[10] [6]
6.0e-20 4.1e-16
VMIRNPN RVGIYYDRLDCYVSYRGEQIC DGSWPPFYQPHRNWTVWSPRM
+++++++ +++++++++++++++++++++ ++++++ ++++++++++++++
76 VASRNPNDRVGVYYDRLDVYASYKYQQITVAASLPPVYQGHGDVDVWSPVLDGPNVPFAPYLASAISQDCQAGYL
[5]
8.4e-27
GRVRWKVGSWISGWYHLFVNC
+++++++++++++++++++++
151 ILQVKIDGRVRWKVGSWISGHYHLFVTCPAFLVTSGGNGAPGASGFKFQTTTYCHVEV
HORVU.MOREX.r3.7HG0749500.1.V3
LENGTH = 211 COMBINED P-VALUE = 3.98e-63 E-VALUE = 3.7e-61
DIAGRAM: 33-[2]-13-[1]-1-[10]-1-[6]-31-[5]-33
[2] [1]
1.3e-16 2.6e-12
IILIFWLVFRPRKPRFYLQSL LNYNLQVT
++++++++++++++++++++ ++++++++
1 MGKDCGNHGGDHLRNGCRRLLAVTLSLAFTVAVIALIVYLVLRPTHPHFSLQDGSLRQLELSNSSGLLSTSLQVT
[10] [6]
8.7e-19 4.1e-16
VMIRNPN RVGIYYDRLDCYVSYRGEQIC DGSWPPFYQPHRNWTVWSPRM
+++++++ +++++++++++++++++++++ ++++++ ++++++++++++++
76 VASRNPNDRVGVYYDRLHVYASYKYQQITVAASLPPVYQGHGDVDVWSPVLDGPNVPLAPYLASTISQDCLAGQL
[5]
8.4e-27
GRVRWKVGSWISGWYHLFVNC
+++++++++++++++++++++
151 MLHVKIDGRVRWKVGSWISGHYHLFVTCQAFLTGGGGGGGNGASGASGFKFHKTNGCRVEV
HORVU.MOREX.r3.5HG0516830.1.V3
LENGTH = 146 COMBINED P-VALUE = 8.33e-63 E-VALUE = 7.7e-61
[9] [8] [4]
2.0e-18 4.9e-15 4.3e-27
QQHGHPDNRVDEYGNPVAGHG ILHRSGSSSSSS EDDGMGGRRK
+++ ++++++++++++ + + ++++++++++++ ++++++++++
1 MEFQGQHDNPANRVDEYGNPFPLAGGMGGAHAAPGTGGQFQARREEHKTRGILHRSGSSSSSSSSEDDGMGGRRK
[3]
5.8e-26
KGMKEKIKEKL GTGEKKGIMDKIKEKLPGQH
+++++++++++ ++++++++++++++++++++
76 KGMKEKIKEKLPGGHKDNQQHMATGTGTGGAYGPGTGTGGAYGQQGHAGMAGTGEKKGIMDKIKEKLPGQH
HORVU.MOREX.r3.6HG0622760.1.V3
LENGTH = 205 COMBINED P-VALUE = 1.96e-62 E-VALUE = 1.8e-60
[9] [8] [4]
1.1e-20 4.9e-15 1.5e-26
QQHGHPDNRVDEYGNPVAGHG ILHRSGSSSSSS EDDGMGG
+++++++ +++++++++++++ ++++++++++++ +++++++
1 MEYQGQQHGRVDEYGNPVAGHGVGTGMGTHGGVGTGAAAGGHYQPMRDEHQTGRGILHRSGSSSSSSSEDDGMGG
RRKKGMKEKIKEKL
++++++++++++++
76 RRKKGIKEKIKEKLPGGHGDQQHNAGTYGYGQQGTGMAGTGGTYGQQGHTGMTGMGATDGTYGQQGHTGMAGTGA
[3]
5.7e-25
GTGEKKGIMDKIKEKLPGQH
+++++++++++++++++++
151 HGTAATGGTYGQQGHTGMTGTGMHGTGGTYGQHGTDTGEKKGIMDKIKEKLPGQH
HORVU.MOREX.r3.2HG0135210.1.V3
LENGTH = 215 COMBINED P-VALUE = 2.27e-60 E-VALUE = 2.1e-58
DIAGRAM: 33-[2]-11-[1]-1-[10]-1-[6]-31-[5]-39
[2] [1]
1.9e-17 1.5e-11
IILIFWLVFRPRKPRFYLQSL LNYNLQVTVM
+++++++++++++++++++++ ++++++++++
1 MSKEKHHRHEHHLRRCCGGFAACLLALVVVVAFIALVVYLALRPTKPSFYLQDLQLRSINLGDPSLSATAQVTLA
[10] [6]
2.0e-18 4.0e-17
IRNPN RVGIYYDRLDCYVSYRGEQIC DGSWPPFYQPHRNWTVWSPRM
+++++ +++++++++++++++++++++ + ++++ ++++++++++++++
76 SRNPNDRVGIFYRRLDVFVTYRDEPVTVPVSLPPMYQGHRDVTIWSPVLSGESVPVAGYVAEAMKQDIAAGYVSL
[5]
2.1e-23
GRVRWKVGSWISGWYHLFVNC
+++++++++++++++++++++
151 LVKIDGRVKWKVGSWVSGSYHLFVSCPAMLAAGPGGMPLGGGLNGTGGAVASLKFTQPTGCTVGT
HORVU.MOREX.r3.5HG0507410.1.V3
LENGTH = 139 COMBINED P-VALUE = 5.89e-59 E-VALUE = 5.5e-57
DIAGRAM: 4-[9]-31-[8]-1-[4]-28-[3]-1
[9] [8] [4]
2.5e-21 1.4e-13 1.9e-2
QQHGHPDNRVDEYGNPVAGHG ILHRSGSSSSSS EDDGMG
+++++++++++++++++++++ ++++++++++++ ++++++
1 MEYQGQHGHATDKVEEYGQPVAGHGGFTGGPTGTHGAAGVGGAQLQATRDGHKTDGVLRRSGSSSSSSSEDDGVG
[3]
5 8.3e-22
GRRKKGMKEKIKEKL GTGEKKGIMDKIKEKLPGQH
+++++++++++++++ +++++++++++++++++++
76 GRRKKGMKEKIKEKLPGGAHKDAAGQQQQTAMAGEYAGTHGTEATGEKKGVMDKIKEKLPGGQH
HORVU.MOREX.r3.3HG0305460.1.V3
LENGTH = 295 COMBINED P-VALUE = 1.12e-58 E-VALUE = 1e-56
[9] [8] [4]
3.9e-18 4.4e-13 1.5e-26
QQHGHPDNRVDEYGNPVAGHG ILHRSGSSSSSS EDDGMGGRRKKG
+++++++++++ ++++++ + ++++ +++++++ ++++++++++++
1 MEYQGQHGNAANRVDQHGNPVAALGATAVTGPPTGGQLQPGREEHKTRGILHRRSSSSSSSSSEDDGMGGRRKKG
MKEKIKEKL
+++++++++
76 IKEKIKEKLPGARKQTYGQPAAPAGMTGAGATGGPHYVQPAPAGTGVHGTTATTGTYVQPAPAGTGAHGTTATTG
[3]
3.3e-17
GTGEKKGIMDKIKEKLPGQH
++++++ +++ +++++++
151 TYGQPAPAGMTGTGAHGTTATGEKKGMKDKIMEKLPGGHKNGQHTMPSAGAYGQPGMTAAGMDGNTTTGGGYGGQ
[3]
5.8e-26
GTGEKKGIMDKIKEKLPGQH
++++++++++++++++++++
226 PGHAGTGTHGHATTGGAYDHQGHPGMTGTGAHGTTATGGAYNQQGHAGLAGTGEKKGIMDKIKEKLPGQH
HORVU.MOREX.r3.5HG0527260.1.V3
LENGTH = 216 COMBINED P-VALUE = 2.34e-57 E-VALUE = 2.2e-55
DIAGRAM: 33-[2]-11-[1]-1-[10]-1-[6]-31-[5]-40
[2] [1]
1.5e-15 1.5e-11
IILIFWLVFRPRKPRFYLQSL LNYNLQVTVM
++++++++++ +++++++++ ++++++++++
1 MSKEQQHRHEHHLRRCCGGLAACLMFLVVAVALTALIVYLALRPAKPSFYLQDLQLRSVSFGDPSLSATAQVTLA
[10] [6]
3.7e-16 4.1e-16
IRNPN RVGIYYDRLDCYVSYRGEQIC DGSWPPFYQPHRNWTVWSPRM
+++++ ++++ ++++++++++++++++ + ++++ ++++++++++++++
76 SRNPNDRVGVLYRRLDVFVTYRDEPVTVPVSLPPAYQGHRDVTIWSPVLSGESVPVAGFVADAMRQDIAAGYVAL
[5]
1.5e-25
GRVRWKVGSWISGWYHLFVNC
+++++++++++++++++++++
151 QVKVDGRVRWKVGSWVSGSYHLFVSCPAVLAAGPGGMPLGGGPNGTSGRAVAALKFGQPTGCTVGT
HORVU.MOREX.r3.2HG0213800.1.V3
LENGTH = 220 COMBINED P-VALUE = 1.74e-56 E-VALUE = 1.6e-54
DIAGRAM: 37-[2]-14-[1]-1-[10]-1-[6]-32-[5]-36
[2] [1]
1.9e-21 4.3
IILIFWLVFRPRKPRFYLQSL LNY
+++++++++++++++++++++ + +
1 MAVKDCGGHKGGCECHRRRLYRKCCGALLALVLLALFIILIVYLVLRPHKPTFYLQDLAVLCLNVTPPTSAYLFT
[10] [6]
e-09 4.2e-15 1.9e-13
NLQVTVMIRNPN RVGIYYDRLDCYVSYRGEQIC DGSWPPFYQPHRNWTVWSPRM
++++++++++ + +++++++++++++ +++ ++ ++ ++ ++++++++++++++
76 TMQATVAARNTNDRVGVYYDETDMYAQYKGVAITVPTRLPVAYQGHRDQSVWSPYLRSMDSVVLPPQLAIALAQD
[5]
2.2e-25
GRVRWKVGSWISGWYHLFVNC
++++++++ ++++++++++++
151 ETAGYVLVDVRVDGWVRWKVGTWISGHYHLRVNCPALIRVNEGKGSYGATTGGGPDYFRFQQAAACAVDI
HORVU.MOREX.r3.4HG0339950.1.V3
LENGTH = 486 COMBINED P-VALUE = 2.84e-56 E-VALUE = 2.6e-54
DIAGRAM: 6-[9]-16-[9]-274-[8]-3-[4]-32-[3]-39-[3]-1
[9] [9]
3.8e-20 5.4e-14
QQHGHPDNRVDEYGNPVAGHG QQHGHPDNRVDEYGNPVAGHG
++++++++++++++++++ + +++++ +++ ++++++++
1 MAHFQGQQHGHPATRVDEYGNPVTAGGHGGGVTGTDGLGHFQGQQHGRTTTRLDEYGNPVTAGHGVGLGSTGAGA
[8] [4]
4.9e-15 1.3e-25
ILHRSGSSSSSS EDDGMGGRRKKGMKEKIKEKL
++++++++++++ +++++++++++++++++++++
301 HGTGHTAGLGGTGTGITGTHDVVGTHPHGGLGEHKTGGILHRSGSSSSSSSSSEDDGMGGRRKKGMKQKIKEKLP
[3]
1.6e-22
GTGEKKGIMDKIKEKLPGQH
++++++++++++++++++++
376 GGNKEQTTATGGYGPGYTGTTGTGGAHGATEGTHEKKGVMEKIKEKLPGGHKDNPPHTTATTGGYGAGTTGTGGY
[3]
5.9e-22
GTGEKKGIMDKIKEKLPGQH
+++++++ ++++++++++++
451 GAGTTGTGGTYGATEGTHEKKGMMEKIKEKLPGGHH
HORVU.MOREX.r3.5HG0507390.1.V3
LENGTH = 141 COMBINED P-VALUE = 2.28e-55 E-VALUE = 2.1e-53
DIAGRAM: 4-[9]-32-[8]-1-[4]-29-[3]-1
[9] [8] [4]
4.3e-18 1.4e-13 1.9e-
QQHGHPDNRVDEYGNPVAGHG ILHRSGSSSSSS EDDGM
++ ++++++++++++++++++ ++++++++++++ +++++
1 MEYQGQTGRATDKVEEYGQPVAGHGGATGGPTGTHGAAAAAGTGQLQPTRDDHKTDGVLRRSGSSSSSSSEDDGV
[3]
25 8.3e-22
GGRRKKGMKEKIKEKL GTGEKKGIMDKIKEKLPGQH
++++++++++++++++ +++++++++++++++++++
76 GGRRKKGMKEKIKEKLPGGAHKDAAGQQHTPAAGEYAGTGTHGAEATGEKKGVMDKIKEKLPGGQH
HORVU.MOREX.r3.7HG0707700.1.V3
LENGTH = 216 COMBINED P-VALUE = 4.43e-53 E-VALUE = 4.1e-51
DIAGRAM: 33-[2]-14-[1]-1-[10]-1-[6]-31-[5]-37
[2] [1]
4.6e-20 1.7e-11
IILIFWLVFRPRKPRFYLQSL LNYNLQV
+++++++++++++++++++++ +++++++
1 MSIKHCDKHDCERRRLYRQFCAALVAIILLILLIILIVWLVLRPTRPRFYLNDLTVACLNATSNPASYLTVTLQA
[10] [6]
6.9e-17 6.8e-13
TVMIRNPN RVGIYYDRLDCYVSYRGEQIC DGSWPPFYQPHRNWTVWSPRM
++++++++ +++++++++++++ +++++++ +++++ ++++ +++++++++
76 TIAARNPNTRVGIYFDRTDAYAEYKGQQVTVPTALPVVYQGHLDVSVWSPFLVGSNVPLAPYLAVALAQDETAGY
[5]
1.3e-19
GRVRWKVGSWISGWYHLFVNC
++++++ ++++++++++++++
151 VLLTVRVDGWIRWKAGAFITGHYHLRVRCPALLTVNGGQGSYGSIAGGGGNGYFNFQRAAPCVVDV
HORVU.MOREX.r3.2HG0167300.1.V3
LENGTH = 216 COMBINED P-VALUE = 1.02e-50 E-VALUE = 9.5e-49
DIAGRAM: 32-[2]-11-[1]-1-[10]-1-[6]-31-[5]-41
[2] [1]
1.6e-14 9.1e-11
IILIFWLVFRPRKPRFYLQSL LNYNLQVTVMI
+++++++++++++++++++++ +++++++++++
1 MSKGKVHHDWILRRCCGSIAACILTLAVLVGFVALVIYLALHPSKPSFYLQDIQLRSIDLSDPALSLDVQVTIAS
[10] [6]
2.3e-14 2.4e-15
RNPN RVGIYYDRLDCYVSYRGEQIC DGSWPPFYQPHRNWTVWSPRM
++++ ++++++ ++++ ++++++++ + ++++ ++++++++++++++
76 RNPNDRVGIYYKTLHAFTTYRDEPVTVPVSLPAIYQGHKDQSVWSPVMSGDSVPVAPYVADAMKQDIAAGYVLLH
[5]
1.3e-22
GRVRWKVGSWISGWYHLFVNC
+++++++++++++ +++++++
151 VKVDGRVKWKVGSWVSGGYHIFVNCPALLSASGGSVGGAFAMSATVGGKQTVSLKFTQPSYCTVDV
HORVU.MOREX.r3.3HG0283230.1.V3
LENGTH = 232 COMBINED P-VALUE = 5.13e-48 E-VALUE = 4.8e-46
[9]
5.5e-17
QQHGHPDNRVDEYGNPVAGHG
++++++++++++++++++
1 MADYGGEYGHPYPRVDEYGNPVPPVDQYGNPIPREPGQAPAYGSAGAVTPAAEYGAGVKPGYGLGGAVHPHESVV
[8] [4] [3]
1.7e-12 1.1e-17 1.9e-23
ILHRSGSSSSSS EDDGMGGRRKKGMKEKIKEKL GTGEKKGIMDKIK
+++++++++++ ++ ++++++++++++++ +++++++++++++
151 GEALRRSGSSSSSSSSSSEDDGQGGRQRKKKGIKEKIKEKLPGNQKHEEHKAGHAAAPAAGTGTHEKKGIMEKIK
EKLPGQH
+++++++
226 EKLPGHH
HORVU.MOREX.r3.6HG0548110.1.V3
LENGTH = 141 COMBINED P-VALUE = 7.21e-48 E-VALUE = 6.7e-46
[9] [8] [4]
1.2e-16 2.4e-13 4.2e-22
QQHGHPDNRVDEYGNPVAGHG ILHRSGSSSSSSEDDGMGGRRKKG
++ +++++ +++++++++ ++ +++++++++++ +++++++++ ++
1 MEYRGQQDHAVDEYGDPVAVHGSMGARSAAGAFTGAGGQLQHGTEERKTGGILRRSGSSSSSAEDDGMGGRREKG
[3]
1e-18
MKEKIKEKL GTGEKKGIMDKIKEKLPGQH
+++++++++ + ++ +++ +++++++++++
76 VKEKVKEKLPGGQHMAAGTGAGGAYGQHTAAGTGAGGDYGQQGNAGMAGEEKGVVDKIKEKLPGQH
HORVU.MOREX.r3.7HG0644010.1.V3
LENGTH = 90 COMBINED P-VALUE = 7.28e-47 E-VALUE = 6.8e-45
DIAGRAM: 27-[7]-13
[7]
2.3e-59
EKTEAATARSHDEKEMAHERGKAKVAQAEAELHQEKVEHREEAMEHRL
++++++++++++++++++++++++++++++++++++++++++++++++
1 MNHAKEKVKDAASAAKAKAKITQAKVAEKTEAATARSHDERELAHERGKAKVAAAEAELHQAKVTHREEAMEHRL
HK
++
76 HKHGAGIGHKHGAGH
HORVU.MOREX.r3.7HG0644030.1.V3
LENGTH = 86 COMBINED P-VALUE = 2.41e-45 E-VALUE = 2.2e-43
DIAGRAM: 27-[7]-9
[7]
2.1e-57
EKTEAATARSHDEKEMAHERGKAKVAQAEAELHQEKVEHREEAMEHRL
++++++++++++++++++++++++++++++++++++++++++++++++
1 MNLAKEKVKDAASAAKAKAKITHAKVAEKTEAATARSHDERELAHERGKAKVAAAEAELYQAKVTHREEAMEHRL
HK
++
76 HKRGHKHSGGH
HORVU.MOREX.r3.7HG0642100.1.V3
LENGTH = 94 COMBINED P-VALUE = 5.51e-42 E-VALUE = 5.1e-40
DIAGRAM: 27-[7]-17
[7]
4e-53
EKTEAATARSHDEKEMAHERGKAKVAQAEAELHQEKVEHREEAMEHRL
++++++++++++++ ++++++++++++++++++++++ +++ ++++++
1 MQQAKVKVKDVSSAVRAKAKIAWAKLAEKMEAMTSRSHDEKQLAHERGRAKVAAAEAQLHQEKVAHREAAMEHRL
HK
++
76 HKHAGVGGHNHKHAAGGVH
HORVU.MOREX.r3.7HG0637810.1.V3
LENGTH = 117 COMBINED P-VALUE = 1.58e-41 E-VALUE = 1.5e-39
DIAGRAM: 27-[7]-40
[7]
2e-54
EKTEAATARSHDEKEMAHERGKAKVAQAEAELHQEKVEHREEAMEHRL
+++++++++++ ++++++++++++++++++++++++++++++++++++
1 MQAAKEKVKDGVSAVKAKTKITQAKASEKAEAATARSHAERELAHERGKAKVAAAKMELHQDKALHREEAMEHRI
HK
++
76 HKHGGGHGRHHHKHGVGIVAAPPPATGAGGYYPPPAAGGQYY
HORVU.MOREX.r3.1HG0060220.1.V3
LENGTH = 262 COMBINED P-VALUE = 4.89e-35 E-VALUE = 4.6e-33
DIAGRAM: 65-[2]-29-[1]-1-[10]-1-[6]-34-[5]-33
[2]
4.5e-15
IILIFWLVFR
++++++++++
1 MGEHHLPPEPADHHKGGKAVIHADDLKPGHRRRRYNYSYYGDTGSRGALRTICSVLLLLILLAGVIALVLYLVYR
[1] [10]
3.6e-08 9.5e-13
PRKPRFYLQSL LNYNLQVTVMIRNPN RVGIYYDRLDCYVSYRGEQ
++++ ++++++ + +++++++ +++++ + + +++++ +++ ++++
76 PNSPAFTVTNIAVYSLTNVTGPSAGLPAAGVGAGARAPYAVAASFQCALVIRNPSGRSSARYDRLTAYVVYRGEA
[6] [5]
1.4e-09 3.4e-15
IC DGSWPPFYQPHRNWTVWSPRM GRVRWKVGSWISGWYHL
++ ++++++ + + +++++++++ +++++ ++++++++ +
151 ITAPAEMPPLVQDPDSAVVVAPVIGDGGATPVPVSPETAAALANDVTYGVVSLRVVLLGRVRFVSGPFRSGWRSM
FVNC
++++
226 YARCDLLVGVRKGPGGVGASGVPEAPLFGNPSCNVDI
HORVU.MOREX.r3.6HG0622690.1.V3
LENGTH = 204 COMBINED P-VALUE = 6.94e-33 E-VALUE = 6.5e-31
DIAGRAM: 43-[2]-10-[1]-1-[10]-1-[6]-26-[5]-24
[2] [
1.3e-14 1
IILIFWLVFRPRKPRFYLQSL L
+++++++ +++++++++++ +
1 MSRITDDPEHSPRDCATKHRHHNSAGRRRLLIGALSAAASLLALAIILWLTLRPSSPRFTLLAATATAPNATAGG
1] [10] [6]
.7e-07 3.2e-11 2.2e-09
NYNLQVTVMIRNPN RVGIYYDRLDCYVSYRGEQIC DGSWPPFYQPHRNWTVWSPRM
+++++++ +++++ ++++ ++++++ +++ + +++ ++++++++++++++++ +
76 IVRLDAAFVAHNPNAHAAVLYDRLQAHASYAGVQLAAAAPLPPFQQAQGDAVLTASLSASSAAASLAETAEAGRA
[5]
4.9e-15
GRVRWKVGSWISGWYHLFVNC
++ ++++ +++++++ + +++
151 TLLLRLRVEGQLRWKVAAWVSGSRALAAECVAVVVPSQLTAVVVQGSQCATTLE
HORVU.MOREX.r3.2HG0139280.1.V3
LENGTH = 202 COMBINED P-VALUE = 1.63e-32 E-VALUE = 1.5e-30
DIAGRAM: 36-[2]-11-[1]-1-[10]-1-[6]-31-[5]-23
[2] [1]
5.0e-15 1.0e-07
IILIFWLVFRPRKPRFYLQSL LNYNLQV
+++++++ ++++++ ++++++ ++ + +
1 MPRNYRLPSYHRQSPAIRCLNFLCAVLLTLVLIAGIILFVLWLSLRPHRPKFTLTDFSIPNVNRQSGAANLPVKF
[10] [6]
8.5e-12 4.5e-10
TVMIRNPN RVGIYYDRLDCYVSYRGEQIC DGSWPPFYQPHRNWTVWSPRM
+++ ++++ ++++++++++ ++++++++++ +++++++++ + ++ ++
76 AVNEHNPNQKIGIHFEAVYGSVYYDDELIASGPVMDPFYQPPKGDTQVQGELAASGPTPTDPAWQRFASEVGAGS
[5]
7.1e-14
GRVRWKVGSWISGWYHLFVNC
+ +++++ +++++++++++++
151 VGLRLVLNSTVRFQVKLWDTKEHHLKADCGFKITGDGSLHQEDRNTPCTLYF
HORVU.MOREX.r3.1HG0055610.1.V3
LENGTH = 208 COMBINED P-VALUE = 2.80e-32 E-VALUE = 2.6e-30
DIAGRAM: 30-[2]-18-[1]-1-[10]-4-[6]-31-[5]-25
[2] [1]
8.5e-13 9.1e-1
IILIFWLVFRPRKPRFYLQSL LNYNLQ
++++++++++++++ +++ ++ +++++
1 MPATTASARPVAVLRCIVAALVVTVLLAGLVVLVFWLVVRPKPIEYSVARAAVRHLNLTAPPGGGGGATLNASFY
[10] [6]
1 1.0e-09 3.1e-12
VTVMIRNPN RVGIYYDRLDCYVSYRGEQIC DGSWPPFYQPHRNWTVWSPRM
+++++++++ +++++++++++++ + +++ ++++++ ++ ++++++++++
76 LTLAADNPNRRVSMRYSSVVVYVHYGAGEVAPQLAVADVPDFRQPSRNETLIQVRAVARSAPVADWVARELEHDR
[5]
6.9e-13
GRVRWKVGSWISGWYHLFVNC
+ + ++ ++++++++++++
151 SDGEVGVEVRVTAVVHFLVGGVKSRHYNMRAVCSPVVIGLSPSSAKSFRGVPCDVAIS
HORVU.MOREX.r3.2HG0213820.1.V3
LENGTH = 207 COMBINED P-VALUE = 2.37e-31 E-VALUE = 2.2e-29
DIAGRAM: 39-[2]-14-[1]-1-[10]-[6]-31-[5]-23
[2] [
3.3e-13 1
IILIFWLVFRPRKPRFYLQSL L
++++++++++++++ +++++ +
1 MGSGSRAASCLCCPFKCLACGLFSCLCSILVSLLVTAGVLALILYFIFRPQMIAATVDSASLTQFALGPANPALL
1] [10] [6]
.3e-13 6.0e-13 5.7e-11
NYNLQVTVMIRNPN RVGIYYDRLDCYVSYRGEQICDGSWPPFYQPHRNWTVWSPRM
++++++++++++++ +++++++++++ ++++++ +++++++++++++ ++ +++++
76 QYNLSVDMTVRNPNKRVGLYYDRVEALALFDGQRFGFAPLDPFFQGHQASTDLKPAFGGQHVLDGDVTQSNLRTQ
[5]
5.1e-06
GRVRWKVGSWISGWYHLFVNC
+ + ++ +++ + ++
151 LAAGAVEVEVKLNAKLRVKVWAFKVPGPRARISCPLSIPAPGGAAPAFKPTDCKVWF
HORVU.MOREX.r3.5HG0446860.1.V3
LENGTH = 208 COMBINED P-VALUE = 3.25e-31 E-VALUE = 3e-29
DIAGRAM: 48-[2]-11-[1]-1-[10]-1-[6]-24-[5]-24
[2]
5.2e-14
IILIFWLVFRPRKPRFYLQSL
+++++++ +++++++++++ +
1 MSLITDDPDRSPRDCATKRHHHHHHHSGGWRRRRLLIAASSGAASLLALCMILWLTLRPSAPRFTLLAATATPSN
[1] [10] [6]
3.3e-08 1.0e-09 3.1e-09
LNYNLQVTVMIRNPN RVGIYYDRLDCYVSYRGEQIC DGSWPPFYQPHRNWTVWSPRM
+++++++++++++ +++ ++ + +++++ +++++ ++++++++++++++++ +
76 ASTGGGLVRLDAALMAHNPNARAAALYDGLRARASYADFQLATAGPLPPFQQAQGDAVLSASLTSAAEASAEEAA
[5]
9.9e-16
GRVRWKVGSWISGWYHLFVNC
++ ++++ +++++ + + +++
151 DGRSPALLRLRIEGRLRWKVAAWVSGGRTLAAVCVAVVAPSQLRTFVVQGTQCAITIE
HORVU.MOREX.r3.2HG0197000.1.V3
LENGTH = 113 COMBINED P-VALUE = 5.39e-30 E-VALUE = 5e-28
DIAGRAM: 27-[7]-36
[7]
6e-42
EKTEAATARSHDEKEMAHERGKAKVAQAEAELHQEKVEHREEAMEHRL
++++++++++++++++++++ +++++++++++++++++++++++ +++
1 MQTAKVKVKDAVSSAKEKAKEGTAKAQGKTGKATATTHGEKEMAKEETRANKAQAKAEMHQEKAEHRADAAAGRH
HK
++
76 GTAHTGPHGHHRPAAAAPADPAYTGTGAGAYPTTDKYV
HORVU.MOREX.r3.5HG0498820.1.V3
LENGTH = 263 COMBINED P-VALUE = 6.82e-30 E-VALUE = 6.3e-28
DIAGRAM: 74-[2]-22-[1]-1-[10]-1-[6]-34-[5]-32
[
7
I
+
1 MRCCARNAKAESRRRRRAKTAHHKAPGKAPKSGATNDRSMESSKKNLCEIHRGDWGGRRVLGASLLAAAVVAAVI
2] [1] [10]
.7e-13 3.1e-09 3.3e-12
ILIFWLVFRPRKPRFYLQSL LNYNLQVTVMIRNPN RVGIYYDRLDCYVSYRG
++++++++++++++ ++ ++ +++++++++ ++++ + ++ ++++ +++++++
76 ALALFLVYRPMKPQATVARAGVYRLVSAAAPGANNSAPTPYALSATVQFTLLLHNPSDRTAVTYDALLAYVTYRG
[6] [5]
3.2e-06 2.6e-15
EQIC DGSWPPFYQPHRNWTVWSPRM GRVRWKVGSWISGWY
++++ +++++ + ++ + +++ + ++++++ +++++ ++
151 EMVAPPAQLPLVLQDPGADVGLSPLLGGDGGAPVPVSADAVDALRADCVAGRVQLRLVVMGRVRYRSGPFKSAWR
HLFVNC
++++++
226 DLYVRCDAILGVTVQAAAGGGGGGDVPLLEYPKCAVDA
HORVU.MOREX.r3.7HG0707750.1.V3
LENGTH = 213 COMBINED P-VALUE = 2.82e-29 E-VALUE = 2.6e-27
DIAGRAM: 39-[2]-13-[1]-1-[10]-[6]-32-[5]-29
[2] [1
5.7e-12 5.
IILIFWLVFRPRKPRFYLQSL LN
++++++++++++ ++ + ++ ++
1 MGKASTVSSWLCCPCRCLFCGLLSCLFSVVATILVIAGVVVLALYLLFRPHLIHATAASADLGNFTLTPQTWILC
] [10] [6]
3e-13 2.6e-13 1.0e-11
YNLQVTVMIRNPN RVGIYYDRLDCYVSYRGEQICDGSWPPFYQPHRNWTVWSPRM
+++++++++++++ ++++++ ++++++++++++++ +++++++++ + ++++ +++
76 YNLSVALSVRNPNSRIAIHYHSVEAEAYYMGQSFARADLPDFYQETGETTVLPLAFAGDHPLEGGVAAAGFRKEA
[5]
5.9e-05
GRVRWKVGSWISGWYHLFVNC
+ ++ +++ + ++++
151 IDHATFSVDVKLSAKMQLKVWAFRVPGPKPRVDCPLIIQRRNASEPTGASPPEFHPIECRVWF
HORVU.MOREX.r3.6HG0602880.1.V3
LENGTH = 254 COMBINED P-VALUE = 7.70e-28 E-VALUE = 7.2e-26
DIAGRAM: 70-[8]-12-[4]-48-[3]-32-[3]-19
[8]
1.8e-
ILHRS
++++
1 MEDERSTQSYQGAEADQVEVTDRGLLGNLLGKKKEEEDKKEEELVTGMEKVSVEEPEVKEDGEKKETLFSKLHRS
[4]
12 1.6e-14
GSSSSSS EDDGMGGRRKKGMKEKIKEKL
+++++++ + + +++++++++++++
76 SSSSSSSSDEEEEEEVIDENGEVIKRKKKKGLKEKLKEKLPGHKDNEAEHVTGLPAPMAPASVQTHHDTDVVVEK
[3] [3]
5.4e-18 6.7e-12
GTGEKKGIMDKIKEKLPGQH GTGEKKGIMD
+ +++++ +++++++++++ +++++
151 IDGDAKTEATPAVPEEEKKGFLEKIKEKLPGGHKKPEDAAAVPVTHAAPAPVHAPAPAAEEVSSPDAKEKKGLLG
KIKEKLPGQH
++ ++++ +
226 KIMDKLPGYHKTGEEDKAAAPSGEHKPRA
HORVU.MOREX.r3.5HG0458120.1.V3
LENGTH = 205 COMBINED P-VALUE = 1.50e-27 E-VALUE = 1.4e-25
DIAGRAM: 27-[2]-12-[1]-1-[10]-7-[6]-41-[5]-18
[2] [1]
2.4e-13 2.5e-09
IILIFWLVFRPRKPRFYLQSL LNYNLQVTVMIRNPN
++++++ ++++++++ ++ ++ +++++ +++ +++++
1 MSCCCSSLKCCCKFLGGLLGALFPIGVIILIYWVIFQPHQIRATVGSATLTGLTVTNASVVSYRLAVTLDIYNPS
[10] [6]
7.4e-14 7.3e-11
RVGIYYDRLDCYVSYRGEQIC DGSWPPFYQPHRNWTVWSPRM
+++++ + +++++++++ +++ +++ ++++ ++++ ++++++
76 LRVGIYHDTLDAELSYRGASLGGPAVGASTASPAEFYQRRKSWKTVKVEFDGSSGGILPGDVAGELEKEMGRGVV
[5]
2.9e-05
GRVRWKVGSWISGWYHLFVNC
+++ + ++ + ++ +++
151 SLEVAVDARVRYRFNRIKIRQKPNLWCSLRIPVKADRGRGVGGALTSGDPCSVKY
HORVU.MOREX.r3.6HG0602250.1.V3
LENGTH = 195 COMBINED P-VALUE = 1.76e-27 E-VALUE = 1.6e-25
DIAGRAM: 31-[2]-12-[1]-[10]-[6]-31-[5]-22
[2] [1]
4.0e-10 4.3e-09
IILIFWLVFRPRKPRFYLQSL LNYNLQVTVMI
+++++++++++ + + +++ + ++ ++ + +++
1 MAGALSATRRTRPTTAQCIAATLFALLVVAAAIVIIWLAVRPGKLRLSIDHATVRGFNFTSGGALQGTFALVLRA
[10] [6]
3.3e-09 8.6e-11
RNPNRVGIYYDRLDCYVSYRGEQICDGSWPPFYQPHRNWTVWSPRM
+++++ + ++++++ +++ ++ ++ ++++ + +++++++ +++++
76 YNPNKRSAVYRSLDVGVWYGDTYLGGAEVPGFRQPPHNETRIVVAAPAAPDALPRDVEREMKKDRSAGMLPLDVH
[5]
2.5e-13
GRVRWKVGSWISGWYHLFVNC
++++++ +++ ++++++++++
151 VRGKVWFKYGLVGTRRYKIRASCPLVPVVFASPSSFDRVYCHVHI
HORVU.MOREX.r3.3HG0267250.1.V3
LENGTH = 288 COMBINED P-VALUE = 5.10e-27 E-VALUE = 4.7e-25
DIAGRAM: 88-[2]-12-[1]-1-[10]-[6]-28-[5]-26-[8]-22
[2] [1] [10]
3.3e-11 6.4e-09 2.1e-08
IILIFWLVFRPRKPRFYLQSL LNYNLQVTVMIRNPN RVGIYYDRLDCYV
++++++ ++++ +++ ++++ ++ ++++++++++++ ++++ ++++ +++
76 TLVLVGLVFLGAIALGVFYVIYHPELPTFAVTSLRLAALNVSDSDSVTSRIEFTVTARNPNEKIAFVYGDIGAAF
[6] [5]
2.1e-10 1.4e-12
SYRGEQICDGSWPPFYQPHRNWTVWSPRM GRVRWKVGSWISGWYHLF
+++ +++++++ + ++ +++++++ ++ +++ ++++++++++++ +
151 AADGTDIGDGTVPGFVHPSRNTTVIKGAASAAAATVDPVQAASLRSKKSHAMSVEMDSKVGFQIGKFKSKRINVR
[8]
7.7e-05
VNC ILHRSGSSSSSS
+ + +++++
226 VLCSGFSAGLAKPAPSPAPIIVAAAPAPTRSKIRLSSSSSGGGGAATTDAKCKLRVKIWIWTF
HORVU.MOREX.r3.2HG0197010.1.V3
LENGTH = 110 COMBINED P-VALUE = 3.08e-26 E-VALUE = 2.9e-24
DIAGRAM: 27-[7]-33
[7]
1.1e-37
EKTEAATARSHDEKEMAHERGKAKVAQAEAELHQEKVEHREEAMEHRL
++++++ ++++++++++++++++++++++++ + ++++++++++++++
1 MQTAKVKAKDMVSSAKEKAKEGSAEVQGKAGKAAATTHGEKEMAKEEERAHKSQADAQEHREKAEHRADAAMGRH
HK
++
76 GTAGTRGHHGPVGAPVAPDPAYPASGGHPAAEKYI
HORVU.MOREX.r3.3HG0300120.1.V3
LENGTH = 241 COMBINED P-VALUE = 1.03e-23 E-VALUE = 9.6e-22
DIAGRAM: 65-[2]-19-[1]-[10]-[6]-46-[1]-18
[2]
3.9e-11
IILIFWLVFR
++++++++++
1 MASYEKPQPQPPANAAPYYAYPAPQQPAYYAPPPPPPPAPRRSAPGCFLCFVFKVIALVVIALGAAVLVLWLILR
[1] [10] [6]
3.0e-14 4.1e-12 1.5e-08
PRKPRFYLQSL LNYNLQVTVMIRNPNRVGIYYDRLDCYVSYRGEQICDGSWPPFYQ
+ + + + ++ +++++++++++++++++ ++++ +++++++++ +++ ++++++
76 PGAVRATAVSATLSRFDLSEGGGRRGGEGILQYNLTVDVRVRNPNRFRIHYEYAEAQASYDGERFGFDPVDPFYL
[1]
8.3e-05
PHRNWTVWSPRM LNYNLQVTVMIRNPN
+++ +++++ ++ +++++ + + + +
151 ERKGEHTVTAAFAGSSAVDDRGALRSYQRERSDGLYIVKVRLYADLGFKVRVFNARRKSKISCTLRLPAPNANAS
HORVU.MOREX.r3.2HG0209950.1.V3
LENGTH = 252 COMBINED P-VALUE = 1.62e-23 E-VALUE = 1.5e-21
DIAGRAM: 83-[2]-13-[1]-1-[10]-[6]-30-[5]-26
[2] [1] [10]
1.5e-12 1.9e-08 2.6e-12
IILIFWLVFRPRKPRFYLQSL LNYNLQVTVMIRNPN RVGIYYDRLDCYVSYRG
+++++ +++++ +++++ ++ + +++++++++++ +++++++ ++++++++
76 VLVVALGATAGILYAVFRPKIPTFRVERLTATRFDVNTTSMTLRDAFEVQVTAENPNRRIGVYYDGGWVSASFNG
[6] [5]
1.2e-09 2.1e-05
EQICDGSWPPFYQPHRNWTVWSPRM GRVRWKVGSWISGWYHLFVN
++++ +++++ ++++++++ +++ ++ + ++++ ++ +++
151 TELCRGAFPALYQGHRSTVRPLITLEGETRLDSAVAAQLLQQRQAGFVPLTVIAHVPIRIKFGALKLWKMTGKAR
C
+
226 CRLVVDNLEAGRRLRIRSNSCSFKLKP
HORVU.MOREX.r3.4HG0350830.1.V3
LENGTH = 300 COMBINED P-VALUE = 3.49e-23 E-VALUE = 3.2e-21
DIAGRAM: 128-[2]-13-[1]-1-[10]-1-[6]-30-[5]-28
[2]
2.5e-14
IILIFWLVFRPRKPRFYLQSL
++++++++++++ ++++++
76 PHHHPHHHHPPPPPSYHHYHNHHNPYQAAPPPPPTCLRRLLALVVAAFLLLGAGTFIVWLLLRPRAPAFSLSSLT
[1] [10] [6]
3.0e-08 1.0e-06 1.4e-11
LNYNLQVTVMIRNPN RVGIYYDRLDCYVSYRGEQIC DGSWPPFYQPHRNWTVWSPRM
+++ +++ + +++++ + ++++++++++ + + +++ ++ +++++++++++++
151 LSRVAYSPANSSLSAAFDASLLADNPNSKLTISYSSLVAYVDLAPSSPIAVTSLAPFAQGPRNATTLAFRLDVDG
[5]
3.3e-07
GRVRWKVGSWISGWYHLFVNC
+ + ++++++ +++ +
226 TYVGPDEAAALKSGNGGTMEVQVRLAAIAVFDRGGWRTRRRAMRVLCDGVPVTFRGKNATDAKFDGPARRCQVVL
HORVU.MOREX.r3.1HG0046460.1.V3
LENGTH = 266 COMBINED P-VALUE = 3.60e-23 E-VALUE = 3.4e-21
DIAGRAM: 96-[2]-12-[1]-23-[6]-30-[5]-27
[2] [1]
2.0e-13 2.5e-08
IILIFWLVFRPRKPRFYLQSL LNYNLQVTVMIRNPN
+++++++++++++++++++++ ++++++++++ +++
76 CCRFICCAVVTALLLAVLAAAALGALYLVFQPKAPRYSVDRLSVSQFQVDPALTASARFDVTVTAANPNGRIGIF
[6] [5]
1.0e-15 5.7e-05
DGSWPPFYQPHRNWTVWSPRM GRVRWKV
+++++++++++++++++ +++ ++
151 YERGSSLSVWYDTHRLAQGALPAFYQPRRNTTVLGVVMAGQAQLGSAVVAALRDEQQTGAVPLVFRADVPVRVEL
GSWISGWYHLFVNC
++++ ++++
226 GSLKLWTVTSRVRCDLVVDSLLNASTHIKIKASNCKFSLKL
HORVU.MOREX.r3.2HG0124050.1.V3
LENGTH = 262 COMBINED P-VALUE = 4.33e-22 E-VALUE = 4e-20
DIAGRAM: 83-[2]-33-[10]-2-[6]-31-[5]-29
[2] [10]
5.3e-13 4.6e-08
IILIFWLVFRPRKPRFYLQSL RVGIYYDRLDCYV
++++++++++++++ +++ ++ +++++++ ++
76 VALLSLAAAVGAVYLAFKPRQPAYSVVSLVVSGLAGVGNASAPGAISPGFVATVRADNSANGKVGVHYDGAGSRV
[6] [5]
5.3e-16 3.7e-05
SYRGEQIC DGSWPPFYQPHRNWTVWSPRM GRVRWKVGSWISG
++ + +++++++++++++++++++++ ++ + + +++
151 AVLYEGVSLADGAWPAFYQAPGNVTVFVVRAKGAGIRFSERERGQMAAAERLKSVMFDVDITVPVRLQLGGVRTW
WYHLFVNC
+++
226 ALPVTVRCAMAVDRLAASAKVVSRSCDVKVSFLFWRN
HORVU.MOREX.r3.2HG0198570.1.V3
LENGTH = 211 COMBINED P-VALUE = 8.40e-22 E-VALUE = 7.8e-20
DIAGRAM: 43-[2]-9-[1]-1-[10]-56-[5]-24
[2] [1
6.8e-12 1.
IILIFWLVFRPRKPRFYLQSL LN
++++ +++++++++++ ++ +
1 MPPTTTTTAGWLHRPLPRERPHLTRCTKNVCSAFLTLLLVAGVLLFVAYLAVRPHRPRFHVTAFAAAGIQQAGAA
] [10]
1e-07 1.9e-10
YNLQVTVMIRNPN RVGIYYDRLDCYVSYRGEQIC
+ ++ ++++++++ ++++++++++++++++
76 VVLSGQLSIRNPNQDVGFFYDRLYMSVLYRQYGAVVKDHDLAGGAPMYQPPKTTSPLAFEGVAVPAGPATADMAR
[5]
1.6e-13
GRVRWKVGSWISGWYHLFVNC
++++ ++ + +++ +++++
151 AAAEAGGAVEFTVKVRSRIRAKVAVWGFHWHPLHVDCDVAVGSDGQLLPEARQKRCGIDFL
HORVU.MOREX.r3.1HG0031210.1.V3
LENGTH = 282 COMBINED P-VALUE = 8.68e-22 E-VALUE = 8.1e-20
DIAGRAM: 75-[2]-15-[1]-24-[6]-29-[5]-61
[2] [1]
3.6e-13 1.3e-09
IILIFWLVFRPRKPRFYLQSL LNYNLQVTVMIRNPN
+ +++++++++++++++++++ ++ ++ +++++++++
76 AGGAFYLLYRPQRPSFTVSSVRLSTFNLSSSTTAPVLTDSIKLTITAKNPNKKLVYFYDDFSFSAATAANAVPLG
[6] [5]
5.3e-10 2.8e-11
DGSWPPFYQPHRNWTVWSPRM GRVRWKVGSWISGWYHLFVNC
+++++ + ++ +++++++ ++ + ++++++++++ +++++
151 DATVPGFAHEAGNTTVFTATITAAGVTVDPSGAGSDLKKSGAFSVAIDADTRAGVKVGSVKTKKMGIQVHCEGIK
HORVU.MOREX.r3.3HG0296120.1.V3
LENGTH = 292 COMBINED P-VALUE = 9.15e-21 E-VALUE = 8.5e-19
DIAGRAM: 113-[2]-33-[10]-2-[6]-31-[5]-29
[2]
5.3e-13
IILIFWLVFRPRKPRFYLQSL
++++++++++++++ +++ ++
76 RLFQHYTRRAKRRAGCSCLRACLYLAVALLSLAVLLAAAVGAVYLAFKPRQPAYSVVSLAVSGLAGVGNASAPGA
[10] [6]
2.2e-08 4.9e-15
RVGIYYDRLDCYVSYRGEQIC DGSWPPFYQPHRNWTVWSPRM
++++++++ ++ +++ + ++++++++++++++++++ ++
151 ISPGFAATVRADNSANGKVGVHYESAGSRVAVSYEGVSLADGAWPAFYQAPGNVTVFVARAKGAGIRFSERERGQ
[5]
3.7e-05
GRVRWKVGSWISGWYHLFVNC
++ + + +++ +++
226 MAAAERLKSVPFDVDITVPVRLQLGGVRTWALPVTVRCAMAVDRLAASAKVVSRSCDVKVPFLFWRN
HORVU.MOREX.r3.6HG0622710.1.V3
LENGTH = 575 COMBINED P-VALUE = 1.13e-20 E-VALUE = 1.1e-18
[3] [3]
1.5e-20 8.4
GTGEKKGIMDKIKEKLPGQH GTG
++++++++++++++++++ +
1 MEHQAHVAGEKKGIMEKIKEKLPGGHGDHKQAADTHGQQGHAGTGTHGAPATGGAYEQQGRTGVTGTGLNGADAG
e-19
EKKGIMDKIKEKLPGQH
++++++++++ ++++++
76 EKKGLMEKIKDKLPGGHGDQQTTAGTYGQQGHTGTAAHGTPAGGGTYDQEGHTGMSGMGAHDTHATGGAYGQHAH
[3]
2e-19
GTGEKKGIMDKIKEKLPGQH
++++++++++ ++ ++++++
151 TGGTGTGTHGTGEKKGVMENIKDKLPGGHGDHQKTSDTYGHQEDTEMTGMGRHSTPATGGSYGQHVHTGQTDMGT
[3] [3]
2.0e-19 5.0e-22
GTGEKKGIMDKIKEKLPGQH GTGEKKGIMD
++++++++++ ++ ++++++ ++++++++++
226 HGTGEKKGVMENIKDKLPGGHDDHQKTAGTYGQQGHVGTGTHGTPATGGAYGQHEHTGATGTGTYGTGEKKGIME
[3]
6.7e-19
KIKEKLPGQH GTGEKKGIMDKIKEKLPG
+++++++++ ++++++++++ +++++ +
301 NIKEKLPGGHGDHQKTGDTYGHQEDTKMTGMGRHSAPATGGSYGQHAHTGETGTGTHGTGEKKGVMENIKEKLSG
[3]
1.3e-19
QH GTGEKKGIMDKIKEKLPGQH
++ +++++++++ +++++++++
376 GHDDHQKTAGTYGQQGQVGTGTHGTPATGGAYGQHEHTGATGTETYSTGEKKGVMENIKEKLPGGHGDHQQTGGI
[3]
4.2e-21
GTGEKKGIMDKIKEKLPGQH
++++++++++ +++++++++
451 YGQQAHVGTGTHDTPATGGTYGQHGHTGVTGTGTHGTGEKKGVMENIKEKLPGGHSDHQHTTETYGQHRHTGVAG
[3]
1.8e-21
GTGEKKGIMDKIKEKLPGQH
++++++ ++++++ ++++++
526 TETHGTTATGGTYGQQAQTGTTGAGTHGTDGTGEKKSLMDKIKDKLPGQH
HORVU.MOREX.r3.6HG0560670.1.V3
LENGTH = 203 COMBINED P-VALUE = 1.66e-20 E-VALUE = 1.5e-18
DIAGRAM: 24-[2]-13-[1]-1-[10]-7-[6]-80
[2] [1] [
3.4e-14 5.6e-08 9
IILIFWLVFRPRKPRFYLQSL LNYNLQVTVMIRNPN R
++++++ ++++++++ +++++ +++++++ + ++++ +
1 MPDSGHPERSCCGKLFTFLFAAGFIILIYWAIFQPHHIRATVSSATLTNLTVAPDNATVSYRLTVGLELYNPSLR
10] [6]
.4e-10 3.0e-08
VGIYYDRLDCYVSYRGEQIC DGSWPPFYQPHRNWTVWSPRM
++++++++++++ ++ + + ++ + +++++++ +++
76 VPIYYDALDAELRASGGASLGGPAARVASSPAEFLQRRKSADTVRLEFDGSTGVSVPGDVARELQREAGAGAVSF
HORVU.MOREX.r3.4HG0390200.1.V3
LENGTH = 241 COMBINED P-VALUE = 1.12e-18 E-VALUE = 1e-16
DIAGRAM: 59-[2]-28-[1]-[10]-[6]-76
[2]
1.1e-11
IILIFWLVFRPRKPRF
++++++++++++++++
1 MTTGSDADRYGHGHGPPSYPQRRPHYGGAPPSYGSSASFRGCCCCIFMLVIFLALLALAVALVVVLAVKPRKPQF
[1] [10] [6]
2.0e-07 3.9e-11 1.8e-0
YLQSL LNYNLQVTVMIRNPNRVGIYYDRLDCYVSYRGEQICDGSWPP
++ + +++++++ +++ + ++++++++++ +++++ +++ ++++
76 DLNQVAVQYLLVAPPSPAVSASPTVAAAPAAAYLSLNITLLFTAVNANKVGIRYGATALDVMYHGVPLGVAAVPG
9
FYQPHRNWTVWSPRM
+ ++ +++++++ ++
151 FEQPAHSTRLLQTRVIVDRFNVLQSDAQDLIRDAALNDRVEFRITGDVAAKILVLGFSSPKVQVSVDCAIDISPK
HORVU.MOREX.r3.4HG0356870.1.V3
LENGTH = 271 COMBINED P-VALUE = 4.47e-18 E-VALUE = 4.2e-16
DIAGRAM: 99-[2]-47-[6]-83
[2]
9.5e-17
IILIFWLVFRPRKPRFYLQSL
+++++++++++++++++++++
76 RRMLRRACCGACCALLLLLALAAAFVGAVYLVFRPRAPSFSVTSLSVAGLLDPSPAKLHAAVRADNGANKKVGVD
[6]
3.4e-15
DGSWPPFYQPHRNWTVWSPRM
++ ++++++++++++++++ +
151 YRGGGEVSVSYSGLLLATGRWPAFYQAPRNVTLISMPLTGKGGVALTEDQRGRLAEQAAAGAVPLTVEARVPVRV
HORVU.MOREX.r3.5HG0463010.1.V3
LENGTH = 278 COMBINED P-VALUE = 2.17e-17 E-VALUE = 2e-15
DIAGRAM: 103-[2]-11-[1]-24-[6]-83
[2] [1]
1.7e-15 8.3e-05
IILIFWLVFRPRKPRFYLQSL LNYNLQVTVMIRNPN
++++++++++++++ +++ ++ ++ +++++++++
76 RPVRRRRLRRACFGACGAVLFLAISAAVFVGAVYLVFRPRAPAFSVASLSIRGLDAVAPSLSPELDVTLRADNGA
[6]
2e-14
DGSWPPFYQPHRNWTVWSPRM
++++++++++++++++++ ++
151 NKKVGVDYRGAGEVAVSYSGVRLAAGQWPAFHQAPRNVTVYSTTLRGTGVSFSDEQRKQLAAEQAARALPLTVEA
HORVU.MOREX.r3.2HG0140430.1.V3
LENGTH = 191 COMBINED P-VALUE = 2.31e-17 E-VALUE = 2.1e-15
DIAGRAM: 28-[2]-13-[1]-[10]-[6]-72
[2] [1]
3.8e-09 1.7e-10
IILIFWLVFRPRKPRFYLQSL LNYNLQVTVMIRN
+++++++++++++ + + +++++ +++++++
1 MARIINKKAAVVCCCALLAAFLLLGAALSTALYFLLLRPHPPHVVATAVDTQLGAFSVLPPALNFSVAVDVTVHN
[10] [6]
1.1e-11 2.8e-05
PNRVGIYYDRLDCYVSYRGEQICDGSWPPFYQPHRNWTVWSPRM
+++++++++++++++++++ ++ ++++ + ++++++ ++
76 PSHAPFRYGEVVTAVTYRGAAVGRSAVPAGKIPARSTRTVGARVRVDAARVILSRHYVVDVVAGALPFHAKTAVA
HORVU.MOREX.r3.5HG0481100.1.V3
LENGTH = 258 COMBINED P-VALUE = 3.91e-17 E-VALUE = 3.6e-15
DIAGRAM: 51-[2]-[8]-10-[1]-[10]-[6]-107
[2] [8]
1.0e-11 4.1
IILIFWLVFRPRKPRFYLQSLILH
++++++++ + ++++++++++
1 MSMDLVMTSRSRRRGGYGCKESCHGHCLPPHSVKCLCLYLLLSLILLVIVAAVLLVVFVTRLKKPTFYLQSVQMD
[1] [10] [6]
e-05 1.4e-05 1.5e-07 5.0e-12
RSGSSSSSS LNYNLQVTVMIRNPNRVGIYYDRLDCYVSYRGEQICDGSWPPFYQPHRNWTVWSPR
++ + +++ + +++ +++ +++ ++++++ + + + +++++++++ ++++++++++ +++
76 RSFSLRSSSSNRSGDNATSSCSVASLLFAAQNPNGLGIRYSAADLGVAYANESVGAMDVPVFYQPPRSSNVTVLM
M
151 HAVFEESNVSRLVVSELSAQRKLVEIRIAGSIDATTHIMNFPLPKLQFTLDCRIATNYTDIVLREGIESATIRKE
HORVU.MOREX.r3.1HG0070590.1.V3
LENGTH = 206 COMBINED P-VALUE = 1.01e-16 E-VALUE = 9.4e-15
DIAGRAM: 36-[2]-17-[1]-[10]-96
[2] [
1.5e-11 1
IILIFWLVFRPRKPRFYLQSL L
++++++ ++++++++ +++++ +
1 MSESGEMAPAARQSRRRRAIICASFVVLALLLLAAVAAIVLLAVLRPRDPTTELLSANATGAAPRVAFPTVSVQL
1] [10]
.3e-12 1.7e-09
NYNLQVTVMIRNPNRVGIYYDRLDCYVSYRGEQIC
++++ +++++++++ +++++++ + +++++ +++
76 NVTFLLAVRIRNPNPASFRYGEATTTLLYRGAPVGEAVVPAGTVPSRGATTMRLGMTVQADKVVAAAGIGGLLGD
HORVU.MOREX.r3.2HG0168560.1.V3
LENGTH = 333 COMBINED P-VALUE = 1.50e-16 E-VALUE = 1.4e-14
DIAGRAM: 155-[2]-20-[1]-22-[6]-46-[10]-12
[2] [1]
1.9e-10 1.1e-06
IILIFWLVFRPRKPRFYLQSL LNYNLQVTVMIRNPN
++++++ + + +++ ++++++ ++++++ +++++
151 VLFAFFALVLWGASRNQKPVVSVNSVTFHNFVIQAGTDASLVPTEMSTINATVRLTFRNTGSFFGVHVTAQPVTL
[6]
4.8e-11
DGSWPPFYQPHRNWTVWSPRM
++++ +++++++++ +++++
226 YYSQLLMASGDMKYFYQPRKSQRKVAVTVVGSKVPLYGGGAGLSSTPGPKGVPPPPVPLQLTLRIRARAGVLGKL
[10]
2.2e-07
RVGIYYDRLDCYVSYRGEQIC
+ +++++++++ + ++++
301 VKPTFYNNVQCSVRLDTTKLGKVVSLKKSCTHV
HORVU.MOREX.r3.2HG0140450.1.V3
LENGTH = 199 COMBINED P-VALUE = 1.71e-16 E-VALUE = 1.6e-14
DIAGRAM: 23-[2]-19-[1]-[10]-100
[2] [1]
6.2e-10 3.1e-12
IILIFWLVFRPRKPRFYLQSL LNYNLQVTVMIR
++ +++++++++++++ + + ++++++++++++
1 MKRKPVVICCSVLLALIVVLAIVFVALYFTVFRPRSPHVVATVVSTRVSHFNVTPDFPIVLPRLNMSMDVDVTVK
[10]
6.9e-11
NPNRVGIYYDRLDCYVSYRGEQIC
+++ ++++++++++++++++ +++
76 NPNYAAFRYGDVVTELTYHGLPVGQSVVLAGEVGARTTQTVGATVVVQADKVVFSPDFIGDVLPKLLDLPDIMLP
HORVU.MOREX.r3.7HG0648340.1.V3
LENGTH = 235 COMBINED P-VALUE = 1.83e-16 E-VALUE = 1.7e-14
DIAGRAM: 67-[2]-13-[1]-1-[10]-52-[5]-24
[2]
8.1e-11
IILIFWLV
++++++++
1 MSNATGNYDGGEHNGPANGGGHHWRQRQRHWRPPQPHSSRAYRSGVLRWAMAVVFTVLAVLVLVAAVAILLVVLV
[1] [10]
9.3e-05 1.4e-08
FRPRKPRFYLQSL LNYNLQVTVMIRNPN RVGIYYDRLDCYVSYRGEQIC
++++++ ++ + + +++++++ + + ++++ +++++ +++++++ ++
76 LQPRAPYLAVQAARLGDLVYDQQGVLDKAELELDVRAANVNAHAAVAFSELELRLSFHDMVIAILRADPFVVPPR
[5]
8e-13
GRVRWKVGSWISGWYHLFVNC
+ +++++ ++ +++ ++ +
151 GERPLEYAASSAAVPLDGAGRAAMEGALNRGVVPFRVSGQARTRWKVGGLVAVKYWTRMACQIRFFWPNGTALDF
HORVU.MOREX.r3.2HG0096290.1.V3
LENGTH = 227 COMBINED P-VALUE = 2.61e-16 E-VALUE = 2.4e-14
DIAGRAM: 63-[2]-13-[1]-1-[10]-[6]-72
[2]
1e-12
IILIFWLVFRPR
+++++++ ++++
1 METPTPYHLQSPRTIVKKIISMKRQQEQQSKIILQPRRRTTPAMWCAAIAGFAFSVLLILAGLVILIVYLSVKPR
[1] [10] [6]
6.6e-08 9.0e-05 3.1e-12
KPRFYLQSL LNYNLQVTVMIRNPN RVGIYYDRLDCYVSYRGEQICDGSWPPFYQPHRNWTV
+++ + ++ + ++++ ++ +++ + ++ + ++ +++ ++ + +++++ ++++ +++
76 TPSFDVANAALNAVYIGSPSSYYNGDMTLVANISNPNHKMGVVIQSGALELFFRGRLVSAQALPPFAQPRGHFTV
WSPRM
+++ +
151 LNVHMLSSQVVLPPEVAADLLNQMRSNKILYTIRGSFMVRERFWSWHYTYRLTAICDIELTAPPSGVLLDRRCTT
HORVU.MOREX.r3.5HG0470600.1.V3
LENGTH = 209 COMBINED P-VALUE = 3.68e-16 E-VALUE = 3.4e-14
DIAGRAM: 39-[2]-13-[1]-23-[6]-77
[2] [1
2.2e-09 8.
IILIFWLVFRPRKPRFYLQSL LN
+++ ++ +++++++++++ + +
1 MGKRSVPRYPEDENKGGGICCCLCGCCCFLLVIMALVAGAVIHFFYTMHPKAPSYSISKMAVSKFDFSSSDLTLY
] [6]
7e-09 3.8e-13
YNLQVTVMIRNPN DGSWPPFYQPHRNWTVWSPRM
+ + +++++++++ ++ ++ +++++++++++ +++
76 TKLVATVRAENPNDKIGIKYAEGSHTVVSYRGTPLCSGKLPTFFQGHNNVTMLEISMEGRHGFGSGLQDALEESE
HORVU.MOREX.r3.3HG0287240.1.V3
LENGTH = 254 COMBINED P-VALUE = 5.15e-16 E-VALUE = 4.8e-14
DIAGRAM: 81-[2]-19-[1]-[10]-97
[2] [1] [10]
1.7e-09 2.2e-10 5.6e-12
IILIFWLVFRPRKPRFYLQSL LNYNLQVTVMIRNPNRVGIYYDRLDCYVS
++++ +++++ +++ ++++++ +++++++++++++++ +++++++ +++++
76 VIAGIVALVLALTVFKVKDPVFTMNDVTLEDVDGEFLGADDRHPVSVNATLNADISIKNPNVASFSYDRSETSFY
YRGEQIC
++++ ++
151 YKGETVGVAYAPDGEVGAGRTVRMNVTLDALADRISPNVNVTDLIFGQGQDYDLTSYTEISGRVGVLGIYKRDLH
HORVU.MOREX.r3.7HG0689310.1.V3
LENGTH = 202 COMBINED P-VALUE = 1.55e-14 E-VALUE = 1.4e-12
DIAGRAM: 37-[2]-12-[1]-[10]-96
[2] [1]
3.3e-11 6.4e-
IILIFWLVFRPRKPRFYLQSL LNYNL
++ + +++++++++++++ ++ + + +
1 MEMEGNQIQISPMGSAPSRSSPRQWSWGSALAGAVTTAAAAGVLVCRPRDPSFELISMNLSTFHFRPPAALDIGL
[10]
09 5.2e-10
QVTVMIRNPNRVGIYYDRLDCYVSYRGEQIC
++++ + +++ +++++++ ++++++ +++++
76 TLTVHATNPNVVPVRYGASNVSILYGGTLLGTARLDAGQQPATSCRLLHLPARLNAMELAHHAGAILADATRRHM
HORVU.MOREX.r3.2HG0140470.1.V3
LENGTH = 192 COMBINED P-VALUE = 1.59e-14 E-VALUE = 1.5e-12
DIAGRAM: 24-[2]-13-[1]-[10]-98
[2] [1] [1
1.1e-08 2.3e-08 6.
IILIFWLVFRPRKPRFYLQSL LNYNLQVTVMIRNPNRV
+ +++++++++ ++++ + + +++++++++++ +++++
1 MKGRKRHHAMSCCVLLTVLIILGILSIVLYILYRPLPPRVVTSPVETIVQDFSLLPPSLTLSASVHVMASNPSRA
0]
0
GIYYDRLDCYVSYRGEQIC
++++++++++++++++ ++
76 PFRYGETVTAVTYHGEAVGSTVVPAGKIGRQTTSWVAPQTEVDGIKVAESPHFASDVVAGALPFVVVVKLDGKAL
HORVU.MOREX.r3.3HG0248640.1.V3
LENGTH = 569 COMBINED P-VALUE = 4.84e-14 E-VALUE = 4.5e-12
DIAGRAM: 397-[2]-20-[1]-1-[10]-[6]-30-[5]-22
[2] [1]
1.0e-06 1.1e-07
IILIFWLVFRPRKPRFYLQSL LNYNLQVTVMIR
++++++ + + ++++ + ++ +++++++ + ++
376 RELSRSCVAAFWFSVFVLAFTLVCLVVWGAARRDKPSVLVKSLTVENFYAGEGTDATGVPTKFVTMNCSLEMDVD
[10] [6]
4.1e-09 5.4e-12
NPN RVGIYYDRLDCYVSYRGEQICDGSWPPFYQPHRNWTVWSPRM
+++ +++++ +++ +++++++ +++++++ ++++ ++ +++++++
451 NPSTMFGIHVSSTSIQLYYSQIPIASGQLEKFYQPKKSRHVLSVNLHGEKTPLYGAGATFVLTDTDGVPLTVDLA
[5]
5.7e-05
GRVRWKVGSWISGWYHLFVNC
+ ++ ++ + ++++
526 VRTRGYVIGRLVRVTHAKRVRCPVLVSSLTDRPIMIAQTACSYT
HORVU.MOREX.r3.3HG0315640.1.V3
LENGTH = 204 COMBINED P-VALUE = 1.71e-13 E-VALUE = 1.6e-11
DIAGRAM: 71-[1]-1-[10]-[6]-57-[8]-6
[1]
1.7e
LNYN
++++
1 MPTAACDHGSAAATASRRRLRVFVVVSLALLLLLTMAFAVLAITALRRHPADTTISTIRLTSVSLSPGRLSLNVT
[10] [6]
-11 1.0e-06 1.5e-08
LQVTVMIRNPN RVGIYYDRLDCYVSYRGEQICDGSWPPFYQPHRNWTVWSPRM
+++ +++++++ +++ ++ +++++++ + +++++++ + ++++++++++
76 LDVVLTIRNPSPVASFAHDAGLAEVYYHGVLAADATVPPGSIGAGSTNVVTIRLTVLADRLAGYAPQLYGDVFGG
[8]
4.7e-05
ILHRSGSSSSSS
++ + +++
151 AGDVSLAVRTTVPGTVTVLGLLRHHAVVLTVCDVVVSVRRPGAQSSSCQYRTKF
HORVU.MOREX.r3.5HG0530290.1.V3
LENGTH = 219 COMBINED P-VALUE = 2.42e-13 E-VALUE = 2.2e-11
DIAGRAM: 77-[1]-1-[10]-1-[6]-47-[2]-15
[1] [10] [6]
1.0e-10 2.8e-08 2.6e-05
LNYNLQVTVMIRNPN RVGIYYDRLDCYVSYRGEQIC DGSWPPFYQPHRNWTVWSPRM
+++ +++++++++++ + +++++ + ++++++++++ ++++ ++ + + ++++ + +
76 QVLSYKATAAVSMRNPNLHYAISFGPVAAAFSFNGTLFDESGTVAAFNLAARKETTVRLKVGGVDKALPKLPAGG
[2]
3.3e-05
IILIFWLVFRPRKPRFYLQSL
++++ + ++ ++ + +++
151 AAEFARQKEAGRFEVEVRLDTVMQYKGRKAKCPLVVICTLSLQLVDPDVAATSFQKTKCTILRAKMSGC
HORVU.MOREX.r3.7HG0683720.1.V3
LENGTH = 219 COMBINED P-VALUE = 2.62e-13 E-VALUE = 2.4e-11
DIAGRAM: 57-[2]-11-[1]-[10]-[6]-73
[2]
1.9e-10
IILIFWLVFRPRKPRFYL
++++++++++ ++++ ++
1 MASTAPACGLPTHTAPAPDAKPADEAGLHRLRRRRRRRCICICALVTLGVLLLLGATLLVLFLTVFRVRDPTTRL
[1] [10] [6]
4.0e-11 1.4e-06 1.2e-05
QSL LNYNLQVTVMIRNPNRVGIYYDRLDCYVSYRGEQICDGSWPPFYQPHRNWTVWSPRM
++ ++++ +++++++++ +++++ + + +++++ ++++++++ + + ++++++
76 LSTRFVGLAPSLTQPNFTLLLTVAVHNPNPASFSYASGTTGLWYRGAHVGDAQVDPGRIPSKGDGIVQLEMTVLT
HORVU.MOREX.r3.6HG0569090.1.V3
LENGTH = 220 COMBINED P-VALUE = 5.21e-12 E-VALUE = 4.8e-10
DIAGRAM: 56-[2]-11-[1]-[10]-96
[2]
1.4e-10
IILIFWLVFRPRKPRFYLQ
++ +++++++ ++++ +++
1 MASEACSLPTHTAPSPDAKPLHDVDDDLRRRRRRRRRRCCICALVTLGVLLLLGVTLLALFLTVLRVRDPSTRLL
[1] [10]
9.6e-09 1.7e-07
SL LNYNLQVTVMIRNPNRVGIYYDRLDCYVSYRGEQIC
++ ++++ ++ ++++++ +++++ + + +++++ ++
76 SARVVGPAPSLAQPNFTVLLAAAMHNPNYVSFSYASGTAGLWYRGIHVGDAQVGPSRIPGRGDETVQLELTVLTA
HORVU.MOREX.r3.4HG0335550.1.V3
LENGTH = 235 COMBINED P-VALUE = 5.60e-12 E-VALUE = 5.2e-10
DIAGRAM: 74-[2]-14-[1]-[10]-90
[
2
I
+
1 MAKTQPRGGPAAEPLLLPPPPPPPPYLTPHPPSGLHATTPSDDGSYVILVPVRLRRRLRRGCRCGCVAPVLASLV
2] [1] [10]
.7e-09 1.2e-09 9.4e-10
ILIFWLVFRPRKPRFYLQSL LNYNLQVTVMIRNPNRVGIYYDRLDCYVSYRGEQIC
++++ ++++++++ +++ ++ +++++ + ++++++ +++ ++++++++ +++ +++
76 LLALAFLLWPSDPGVSVARLRLAHVSVVARPAVALNVSAALKARVRNPNLFALGYSRLDVAIGYRGRPLGTVSSG
HORVU.MOREX.r3.4HG0364700.1.V3
LENGTH = 175 COMBINED P-VALUE = 8.73e-12 E-VALUE = 8.1e-10
DIAGRAM: 10-[8]-11-[1]-1-[10]-69-[2]-15
[8] [1] [10]
4.2e-05 5.0e-12 4.3e-06
ILHRSGSSSSSS LNYNLQVTVMIRNPN RVGIYYDRLDCYVSYRGEQIC
+ + ++ ++ +++++++++++++++ + +++++ + +++++ +++
1 MAEDALLTSFELAPSPNSSNSSTAATAKSPLQVLSYNATAAVSMRNPNLHYAISFGPVAVAFSFYSTLFDDSGTV
[2]
5.8e-05
IILIFWLVFRP
++++ + ++
76 AAFDLAAQKETTVPLKVGGLDKALPKLPAGGAAEFERQKEAGRFEMEVRLDTVMQYKGHKAKCLLVVICPLSLQL
RKPRFYLQSL
++ +++
151 VDPDLAATSFQKTKCTILRAKMSGC
HORVU.MOREX.r3.4HG0353320.1.V3
LENGTH = 232 COMBINED P-VALUE = 8.35e-11 E-VALUE = 7.8e-09
DIAGRAM: 60-[2]-18-[1]-77-[2]-20
[2]
4e-10
IILIFWLVFRPRKPR
++++++++++ ++++
1 MGSPKSKPSSPMASSKPPTPSSKSKSSSPVASPALHHQARRRRRRCLIATTAVLLALAVVLAVLFLTVLRVRDPT
[1]
5.9e-12
FYLQSL LNYNLQVTVMIRNPN
+++ + +++++ +++++++++
76 IRLVSTQFVGAAPRFALLPTPSIRLNLTLLITVSVHNPNPASFTYADGGHADLSYRGAHVGDAEIDPGAVPSGGD
[2]
3.1e-05
IILIFWLVFRPRKPRFYLQSL
++++ +++ ++ ++ ++
151 AEVRLVLTLEADRFAAAGDSRQLADDVESRALPLDASTTVPGTVLLFGVFRRSAVAFSECRLVFAVMEMRVQSHQ
HORVU.MOREX.r3.6HG0602570.1.V3
LENGTH = 336 COMBINED P-VALUE = 1.02e-10 E-VALUE = 9.5e-09
DIAGRAM: 154-[2]-20-[1]-22-[6]-83
[2] [1]
1.4e-07 2.5e-07
IILIFWLVFRPRKPRFYLQSL LNYNLQVTVMIRNPN
++++++ + + ++++ + ++ +++++++ +++++
151 VFAFFLLVLWGASKSYKPHVDVKSVVFESYHIQGGTDRTGVPTRMMSVNATVRLRFRNRGTFFGLHVTAAPFHLF
[6]
6.7e-11
DGSWPPFYQPHRNWTVWSPRM
++++ ++++++++ +++++++
226 FDDLTVATGNMKEFYQARKSGRVVTVSVVGKQVPLYGAGANLHSKPNNGRLGPAVVPVRLAFVLRARAHILGLLL
HORVU.MOREX.r3.1HG0082740.1.V3
LENGTH = 253 COMBINED P-VALUE = 4.57e-10 E-VALUE = 4.2e-08
DIAGRAM: 32-[9]-29-[2]-8-[1]-[10]-106
[9]
5.4e-05
QQHGHPDNRVDEYGNPVAGHG
+ ++ +++ + ++
1 MATAASSSRVAAAADHPEDKNDPARPLAVPHPYAHHLAASDVDEAAQTATGWRSTQYLRRKRRCLLCCGGCCVAT
[2] [1] [10]
2.2e-07 4.7e-10 1.6e-06
IILIFWLVFRPRKPRFYLQSL LNYNLQVTVMIRNPNRVGIYYDRLDCYVSYRGEQIC
++++ +++++ ++++ +++ + ++++++++++++++ ++++++ ++++ + +
76 VVVVGILVLVLALTAFKVKDPRLTMNGVSLTAGPSAANATLTADVSVENPNVASFRFSPSATEVYLGGRTVSVAY
HORVU.MOREX.r3.5HG0528290.1.V3
LENGTH = 252 COMBINED P-VALUE = 3.87e-09 E-VALUE = 3.6e-07
DIAGRAM: 90-[2]-14-[1]-1-[10]-90
[2] [1] [10]
2.4e-06 7.8e-09 5.2e-10
IILIFWLVFRPRKPRFYLQSL LNYNLQVTVMIRNPN RVGIYYDRL
++ +++++ ++++ ++ ++ + +++ + ++++++ +++++++
76 PRFSARTLPLLLALALLAGLVFLLYPSAPAARVADIRLDRFRVNPPPFPALDFNLALGLRVRNPGFLLPLRYRAV
DCYVSYRGEQIC
+++++++ +++
151 SAAVSYRGRLLGSGTARPGSGELAARGVTYASSEVWVDAGRVLDDVIELIGDIAAGSVPLEIVTEVVGAIRLFHF
HORVU.MOREX.r3.5HG0424150.1.V3
LENGTH = 136 COMBINED P-VALUE = 2.38e-06 E-VALUE = 0.00022
DIAGRAM: 38-[9]-77
[9]
1.4e-13
QQHGHPDNRVDEYGNPVAGHG
+++ ++++++++ +++ +++
1 MSDQPQPVRTGDVYPPSASAHDARRQRDEVLGTHGGDQQQNQDGDLRVTEADEPHAGRRVVTATAGGQVMAQFTV
HORVU.MOREX.r3.5HG0532580.1.V3
LENGTH = 327 COMBINED P-VALUE = 2.54e-06 E-VALUE = 0.00024
DIAGRAM: 26-[3]-38-[1]-111-[1]-102
[3]
7.3e-05
GTGEKKGIMDKIKEKLPGQH
+ ++ + ++ ++
1 MSSSSDNPNEVTDRGLFSSKSNKDDADAGKKKKKEEESKEEGGGGFIDKVKDFIHDIGEKIEEAVGFGKPSADVA
[1]
3.6e-08
LNYNLQVTVMIRNPN
+++ +++ +++++
76 RIHVPHIGLHRADLVVDVLIKNPNPVPIPLVDIDYLIDSDGRKLVAGLIPDAGTVRAHGEETVKVPITLDFDDIR
[1]
4.3e-06
LNYNLQVTVMIRNPN
++++++++ ++ +
151 STYADIKPGSIIPYLLRVVFLVDVPVFGRIKIPLDKSGEIPIPYKPDVDVDKIKFHHFSFEETTATIHLSLENKN
HORVU.MOREX.r3.5HG0424060.1.V3
LENGTH = 223 COMBINED P-VALUE = 3.25e-06 E-VALUE = 0.0003
DIAGRAM: 38-[9]-164
[9]
2.9e-13
QQHGHPDNRVDEYGNPVAGHG
+++ ++++++++ +++ +++
1 MSDQPQPVRTGDVYPPSASAHDARRQRDEVLGAHGGDQQQNRDGDLRVTEADEPDAGRRVVTATAGGQVMAQFTV
HORVU.MOREX.r3.6HG0558740.1.V3
LENGTH = 207 COMBINED P-VALUE = 1.44e-05 E-VALUE = 0.0013
DIAGRAM: 64-[1]-77-[3]-31
[1]
3.1e-09
LNYNLQVTVMI
+ +++++ + +
1 MGLRDCLGDCWEDCKWALACLAAVVAVIIIAVMVAAYSFALQPSITVEDASLTRFALATTPATSLGYNLSLKLIV
RNPN
++ +
76 RNRNWATTMKNTEPLEAAYKFDGQQFERVQVADKGDKHGPRKTRVYHLNTGQESGYVSLGNAGVAAYKEQNKTGE
[3]
4.3e-05
GTGEKKGIMDKIKEKLPGQH
+++ + ++ +
151 FELEVAVTGEVRYTLQLKKNKLAGTCKLKLKLDSPATAAVVFEKVKCKLEKEKKDKE
HORVU.MOREX.r3.2HG0199510.1.V3
LENGTH = 221 COMBINED P-VALUE = 1.48e-05 E-VALUE = 0.0014
[1]
8.4e-10
LNYNLQVTVMIRNPN
+++++++++++ +
76 ATAFAYNLSLTLTVRNKNWAMSVRNTRPLEADYSFDGQRFERVRLADEGSTHPAGKTQVYHLVSGADGAYVALGN
[10]
5e-06
RVGIYYDRLDCYVSYRGEQIC
++ + + + + +++++
151 AGVAEFREENKTGVFQVEVALSGQVRYQAHLTKCNFQAKCPLKLQLAPPGTTAIVFQKVKCKLASPDQKNC
HORVU.MOREX.r3.3HG0233660.1.V3
LENGTH = 309 COMBINED P-VALUE = 6.79e-05 E-VALUE = 0.0063
DIAGRAM: 19-[4]-23-[1]-111-[1]-105
[4] [1]
3.1e-05 3.6e-08
EDDGMGGRRKKGMKEKIKEKL LNYNLQVTVMIR
++ + + + + ++ + + +++++
1 MSSSGSPKVTEKKVDKDQDDGEGGFFDKVKDFIQDIGEKIEEVVSFGKPTADVTGIHIPQISLEKVELIADVMIT
NPN
+++
76 NPNPVPIPLVDIEYLIESEGRKLMSGTIPDAGTIHAHGSETVKIPVLLIYDDIKSTYGDIKPGSIIPYLIKVILH
[1]
1.8e-06
LNYNLQVTVMIRNPN
++++++++ ++ +
151 VDVPVIGRISLPLEKAGEIPVPYKPDVDISKIKFEKFSFEEATATLHLNLDNKNDFDLGLNALDYEIWLSNVSIA
HORVU.MOREX.r3.6HG0592430.1.V3
LENGTH = 98 COMBINED P-VALUE = 1.10e-02 E-VALUE = 1
DIAGRAM: 7-[7]-41
[7]
3.2e-07
EKTEAATARSHDEKEMAHERGKAKVAQAEAELHQEKVEHREEAMEHRLHK
+ ++ ++ + + ++++ + + + ++++
1 MESGKEAAANAGASARAGMEKTRAAFQGQVDKAAAYTTGHREAAVVNKEAAEVKKQQRMRAAEEEKQRAVRDNAA
HORVU.MOREX.r3.4HG0403120.1.V3
LENGTH = 462 COMBINED P-VALUE = 1.39e-02 E-VALUE = 1.3
DIAGRAM: 175-[9]-51-[7]-64-[7]-5-[4]-25
[9]
2.4e-05
QQHGHPDNRVDEYGNPVAGHG
+ ++ ++++ ++ +
151 KKAEQAKHKTKEATEAAAKTGAETHERSKQGKAKVEETAKEKAGQGYETLKQTKDAASEKAGAAKDTAAEKAAAA
[7]
7.8e-06
EKTEAATARSHDEKEMAHERGKAKVAQAEAELHQEKVEHREEAMEHRLHK
+ + ++ + ++++ + +++ +++
226 KEKAGGATQTAAEKAAAAKDAAAKKAGGATQTAAEKAAAAKDAAAKKAGGATQTAAEKAAAAKDAAADKAKAAKD
[7]
6.1e-05
EKTEAATARSHDEK
+++ ++
301 AAWEKTESAKDATWQAQEKLKQYNDVASEKAGNVKDAAAEKAGTAKQATAEKAAAAKDTAAEKAAAAKDAAWKNA
[4]
8.9e-05
EMAHERGKAKVAQAEAELHQEKVEHREEAMEHRLHK EDDGMGGRRKKGMKEKIKEKL
+ ++ + +++ + + + + + ++++++
376 EAAKSTVSEKAGAAKDATLEKTASAKDAAWETAEAAKDTAWETAEAAKGKANEGYEKVKEKVGEVKDKVTGAAAD
HORVU.MOREX.r3.7HG0675510.1.V3
LENGTH = 80 COMBINED P-VALUE = 1.78e-02 E-VALUE = 1.7
DIAGRAM: 27-[7]-3
[7]
9.2e-08
EKTEAATARSHDEKEMAHERGKAKVAQAEAELHQEKVEHREEAMEHRL
++ +++ + + + + + ++ + ++ +
1 MATIKAKVKDAASSAKAGIDKAKASAGEKVQKATTTDPRKKREAEENKEDRLLKVDSDEREEKGDHAAERSGRRT
HK
76 IITGT
HORVU.MOREX.r3.3HG0273460.1.V3
LENGTH = 181 COMBINED P-VALUE = 5.01e-02 E-VALUE = 4.7
DIAGRAM: 66-[1]-100
[1]
2.9e-05
LNYNLQVTV
+ + ++
1 MGTGEDDDVTTAEPGGEDQQTREAGEGGGVVASLVGKAKGFVAEKIAQIPKPEASLERVSFKSISREGVALHSHV
MIRNPN
+ ++
76 DVSNPYSYRIPICELTYTFKSDGKVIASGTMPDPGWIGASGTTKLELPVNVPYDFVMSLMKDLSGDWDIDYVLEV
HORVU.MOREX.r3.5HG0470900.1.V3
LENGTH = 175 COMBINED P-VALUE = 8.16e-02 E-VALUE = 7.6
DIAGRAM: [9]-18-[7]-86
[9] [7]
8.6e-05 1.2e-05
QQHGHPDNRVDEYGNPVAGHG EKTEAATARSHDEKEMAHERGKAKVAQAEAELHQEK
++ + + + ++ + ++ + + + + + + +++
1 MQGGKSSSAVGAAKEAVANVGASAWAGKEKTKAVVQETVKKAKAHDPAAKAEAEARKQERIHEVEAAKQDAMRHN
VEHREEAMEHRLHK
+ + + +
76 AAAKEHATAASYHPTAGAAVDPRDVEVEGATQAGRHNAAAMEHATAGACVDAHDVEVEGARSRAGSSDDGYLPVT
HORVU.MOREX.r3.3HG0257070.1.V3
LENGTH = 419 COMBINED P-VALUE = 1.03e-01 E-VALUE = 9.6
DIAGRAM: 106-[7]-18-[7]-47-[7]-23-[7]-25
[7]
1.6e-05
EKTEAATARSHDEKEMAHERGKAKVAQAEAELHQEKVEHREEAM
+ + ++ + + + ++ + ++ + +
76 STGAMGTAGEKLNEYGSYASQKAEEGKESASEMADAAAGKTMETKDAAAEKTREMADAAAGKTKETKDAATEKTT
[7]
9.5e-05
EHRLHK EKTEAATARSHDEKEMAHERGKAKVAQAEAELHQEKVEHREEAMEHRLHK
+ + + +++ + + ++ ++ +++ ++
151 EIADTAARKAAETKDAAAEKARGAGEMVTEKARSAKDAALETKDAAAEKASGAAETVTEKAKGAKDAVFETAEGA
[7]
7.3e-05
EKTEAATARSHDEKEMAHERGKAKVAQAE
+ ++ + ++
226 REYMVDKKEDARRALAGSAKYSKGETNESAWQQGQDVRRRAAEKAEEVRQRTHLPPEEERSKSATENIFGSAQGL
[7]
1.8e-06
AELHQEKVEHREEAMEHRLHK EKTEAATARSHDEKEMAHERGKAKVAQAEAE
+ ++ + + + + + ++ + + +++ +++ +
301 TQVLKEKMTMPTDVIEQKLAERKGMPTDAGRGEALNADDVMIRVKEADQMTGTGFNDVGKMGEEGTGMKAALRAS
LHQEKVEHREEAMEHRLHK
+ + + ++ +
376 DEEEDVMLRVKAADQMTGQAFNDVGPMGEEGTGMEPALRARKNA
********************************************************************************
CPU: noble-meme.grid.gs.washington.edu
Time 0.077 secs.
mast -oc . -nostatus meme.xml sequences.fa

## Sheet: Table S3
Table S3. Sequences
Gene rename	Genomic seq.	CDS seq.	Proteins seq.	Promoter seq.
HvSnRK-1	ATGGTGGCGACGGGGGACGCGGAGGACGCGGCGGCGGGGTGCCGCGCGCGGGCGGCGCTGCTCGGTGCGTACGAGCTGGGCCGCACGCTCGGGGAAGGCAGCTTCGGCAAGGTGAAGCACGCGCGGCACCGCGCCACGGGGGACCACTTCGCCGTCAAGATCCTCGACCGCGGCAGGGTGCTCTCCCTCCGCGGCGCCGACGACCAGGTCCGCCGGGAGATCGCCACGCTCACCATGCTCGCCCACCCCAACGTCGTCCGCCTCCACGAGGTAATTAGTAGTACTAGTAGTAGTACTACCAATCGCGATCTCGGCTCCTGTTCTGCTAGTTCTCTTGCTGCTGCCTCTGCTAGATGCGTGTATATGATTAGAATATGGATAGAGTGCCCTTGGTTGAAA…	ATGGTGGCGACGGGGGACGCGGAGGACGCGGCGGCGGGGTGCCGCGCGCGGGCGGCGCTGCTCGGTGCGTACGAGCTGGGCCGCACGCTCGGGGAAGGCAGCTTCGGCAAGGTGAAGCACGCGCGGCACCGCGCCACGGGGGACCACTTCGCCGTCAAGATCCTCGACCGCGGCAGGGTGCTCTCCCTCCGCGGCGCCGACGACCAGGTCCGCCGGGAGATCGCCACGCTCACCATGCTCGCCCACCCCAACGTCGTCCGCCTCCACGAGGTTGCTGCTAGCAAAACAAAGATCTATATGGTGCTTGAGTTTGTCAATGGAGGCGAACTGTTTGACAGGATTGCAATGAAGAGAAAACTATCCGAACGAGAAGGAAGAAGACTTTTTCAGCAGCTAATT…	MVATGDAEDAAAGCRARAALLGAYELGRTLGEGSFGKVKHARHRATGDHFAVKILDRGRVLSLRGADDQVRREIATLTMLAHPNVVRLHEVAASKTKIYMVLEFVNGGELFDRIAMKRKLSEREGRRLFQQLIDGVSYCHGKGVYHRDLKPENVLIDRKGNIKISDFGLCALPQHLGKDGLLHTTCGSPNYIAPEVLQNRGYDGSLSDIWSCGVILYIMLIGQLPFDDRNMVVLYQKIFKGDTKIPEWLSPGAQNLLKRILEPNPMKRINMAEIKLHEWFQKDYIPVGPYDDDDEDLRLGAIMPVKQQISEAPGDKSTRQMNAFQLIGMASSLDLSGFFEEEGVSQRKIRFTSALPPKDLFDKIEVSATQSGFHVQRAHSKLKITRNCNGPNNPLPFLV…	TGGGAAGCAGTCGGCTCCCTGGCGGCAAGACGTCGGCGGCGGGCGACGTGGGAGTGGGCGGCGTTGCTGAGAGTGGGCGGATGTGGGCGGCGTTGCTGAGAGTGGGCAGCCCGCAGAGTGGCCGGCAAAAATGGGTGGCGGCGTCGGCGACGAAGGAGGCGAGCAACGGTTGCTGTTGTATGGGGGCCAATGTGTCACCGACCAGCGGGCCCGGAGGGGAGGAGAAGGCGAGCGTGTGCGCATCCGTCGCGTGTCCGCGCCGACGCAAATTCGGCTCAAAAATGGGCCGGGAATGGGTCGTCCGCGGACGAAAAACAGACGCCCGTCCGTTTAGGTTGGCGCGTTGGGCCGCCTATTGTGTCCGCGCCGACCCAAACGGACGGCGACAGACGAAATGGA…
HvSnRK-10	AGACAGACAGACGGACCCAACCCCAACCCCAACCAGCTAGCGCAACAAATAGAGCGAAACACCAGGAAAACTAAGCCAAGCTGTTCCCGTTCCGTTCCGCTCCTCCCTCTAAACGCCCACCGCCGCGCAATCCGCCTCCCTCCCCGCGCCTCCGCCCGTCCTCTTCCCAGCCGCATGGCGGCCACCCCGCCGTCGTCGCGGGACGCGTCGCCGCAGCCCCGCCGGCCGGCCTCCTCCGCGGGCCGTCCCGCCGCAGCCGCGGGCCGGCCCAGCGGCACCGGCGCCGTTGCCGGCAATGGCAAGCGCGGCGGCCTCCTGCTCGGCCGCTACGAGCTGGGACGCATCCTCGGCCACGGCACCTTCGCCAAGGTCTACCACGCGCGCCACGCCGACACGGGC…	ATGGCGGCCACCCCGCCGTCGTCGCGGGACGCGTCGCCGCAGCCCCGCCGGCCGGCCTCCTCCGCGGGCCGTCCCGCCGCAGCCGCGGGCCGGCCCAGCGGCACCGGCGCCGTTGCCGGCAATGGCAAGCGCGGCGGCCTCCTGCTCGGCCGCTACGAGCTGGGACGCATCCTCGGCCACGGCACCTTCGCCAAGGTCTACCACGCGCGCCACGCCGACACGGGCGAGACGGTCGCCATCAAGGTGCTCGACAAGGAGAAGGCCCTGCGCGCGGGCCTCGTCCCGCACATCAAGCGCGAGATCACCATCCTCCGCCGCGTCCGCCACCCCAACATCGTGCGCCTCTTCGAGGTCATGGCCACCAAGTCCAAGATCTACTTCGTCATGGAGTTCGTCCGC…	MAATPPSSRDASPQPRRPASSAGRPAAAAGRPSGTGAVAGNGKRGGLLLGRYELGRILGHGTFAKVYHARHADTGETVAIKVLDKEKALRAGLVPHIKREITILRRVRHPNIVRLFEVMATKSKIYFVMEFVRGGELFARVAKGRLKEDTARRYFQQLISAVGFCHARGVFHRDLKPENLLVDEHGDLKVSDFGLSAVADQFHPDGLLHTFCGTPSYVAPEMLARRGYDGAKADIWSCGVILFVLMAGYLPFHDQNLMAMYRKIYRGEFRCPRWFSKDLTSLLNRLLDTNPETRITMAEVMQSRWFQKGFRPVRFYVEDDQLHSLADGESEELGLVEPAEPPPPPPLPPPLPPPPQQEDDDSGWESDSSVASCPATLSSEERQRPAGRLTRPASLNAFD…	GCATGTGCTTCCTAGGATGACCAGTAAAATAAAAAATACATAGTTAAATAATATTAGAAAAACTGAAATTTGTTGGCATCAAGGATGAACAAGTTTTCTAGGGGCGTGCAAACTTTCGTGGCGGTCGGCTATCGAAGGAGTTGCAGACAAAAAATATTCGCGTTTCAAAAAAGATGAAAAAAATTCCGATTGTGGACCAATGCCTTTATTTATTCTGTCCCGAGCTCCCCAATTCAAACCGCCATGAAATTTTACACGCCCTTATAAAATTCGCCCGTCTTTGATATGTTAAGAAAACAGTTTTTATTTTATTTTTGTACACCCCTTCCCCTCGTTTTTACAATTCGTTGAGAGCATCTCTGCTCACTATAGGATTGTCACTTGCCAAATGTGAGGAGT…
HvSnRK-11	CGCCCGCCCGCCCCCGTCAGGTCAGCCCTCACCGCCTCCCCTCTCCATCCCTTCTTCCGCCGTCCCCTATGCCGCCGTCGAACCCAGCCGCCCGTCTGGGGTTAGCTGGACCAGCCAAGCTCCGCTCCGCCCCGCGCCCGCTGCGCCGCTCGCCGATCCAAGGGGCCCCGCTCATGCCGCCGCGCCCCAGATCCGGGAGCCCGCGCCCCCCTCTTGCGTGCATGGCCATGTGGCCGCGCCGCAATCTCGCTAATCCGATCGCGCCGGATTAGTTTTTCCGGATGAGAAATGTTGCGTACTTGCGTTGCGTGGGATCGGCGGGCTAAGCGACCCGGGCCTCCTTCCACTTCGCGCTTCCGCGCGGAATTAACGTGTGCATAGTTCATGTCTCTGCCGCAG…	ATGGACGCAGCAGGCAGGGATGCCAACCCCTTGGCCGGCTACCGGATCGGCAAAACCCTCGGCATCGGGTCCTTTGGCAAGGTCAAGATCGCCGAGCATATAATTACGGGACACAAGGTCGCAATCAAGATCCTCAATCGCCGCAAGATCAAGAGCATGGAGATGGAAGAGAAAGTGAAAAGAGAAATCAAGATACTGAGATTATTTATGCATCCTCATATCATACGGCTTTATGAGGTCATAGATACCCCAGCGGATATTTATGTTGTTATGGAGTATGTTAAATCTGGAGAGTTATTTGACTATATTGTTGAGAAGGGAAGATTACAAGAGGAAGAAGCTCGTCGCTTTTTCCAGCAAATTATATCTGGTGTGGAATATTGCCATAGAAACATGGTG…	MDAAGRDANPLAGYRIGKTLGIGSFGKVKIAEHIITGHKVAIKILNRRKIKSMEMEEKVKREIKILRLFMHPHIIRLYEVIDTPADIYVVMEYVKSGELFDYIVEKGRLQEEEARRFFQQIISGVEYCHRNMVVHRDLKPENLLLDSKCNVKIADFGLSNVMRDGHFLKTSCGSPNYAAPEVISGKLYAGPEVDVWSCGVILYALLCGTLPFDDENIPNLFKKIKGGIYTLPSHLSPLARDLIPRMLVVDPMKRITIREIREHSWFKARLPRYLAVPPPDTAQQVKKLDDETLNDVIKMGFDKNQLTESLQKRLQNEATVAYYLLLDNKLRTTSGYLGAEYQESMDSSFSQISPETPSSASEARQYGSPGFGLRQHFAAERKWALGLQSRAHPREIITE…	TGTTGAAATTTACTTTGAAATGTTTGCAAGCATGGTTGGATGGCCTCATATATATAACTATGCGCGAACTGGTCTGGATCAATCAATGGACGTATAGCGTGTTCGTTTGGTTTGGCGGTGGAGATGCCTTCATAAGGTTTTTATACGAGCCCATGCGTCACTATTCCCCATGTCATTTCACCAACGAATATTGAGGACAATTGTCTGTTTAGTGTATGTAGGTACGTATGTACGAGCGCATGCATCTGTATTGGCAGTATTATGTTTTTTTTTGAAAATTAGCACACAAATGCATTTGTGATTAATTGAAAATTAAAACGAAAATAAAGTAACCTCAGCGCCACATTATGTACCAACTCAAGGATCGTTGCTTAGCACGGAAAGAAACATATGCAGCAA…
HvSnRK-12	ATGGACGCCCCCATCCCCACCCCTCCCACTCCACTCACCGCTCCGCCGCCGCTCCCCCCGCCGCCATGGGCGGCCGCGCCTCCCGCCAGCGCTCCGACCCCCCGCCCCCGCAGGCGCAGCAAACCCCCAAGCAGCCCAACTGGCCCCGTCCCCGCCACCGCCGCCAGCCCCAACCCCCTCCACCGCAACCCCCACCCCCACCCCAACAGCCCCCACCCCAGCCCGCCCTCCCCCCAGACGTCGGCCGGGTGCTGGGCCGGCCGATGGAGGACGTGCGCGCCACCTACACCTTCGGCCGCGAGCTGGGCAGGGGCCAGTTCGGGGTCACCTACCTCGCCACCCACAAGTCAACCGGCGCGCGCTACGCCTGCAAGTCCATCGCGGCCCGGAAGCTGGCCC…	ATGGGCGGCCGCGCCTCCCGCCAGCGCTCCGACCCCCCGCCCCCGCAGGCGCAGCAAACCCCCAAGCAGCCCAACTGGCCCCGTCCCCGCCACCGCCGCCAGCCCCAACCCCCTCCACCGCAACCCCCACCCCCACCCCAACAGCCCCCACCCCAGCCCGCCCTCCCCCCAGACGTCGGCCGGGTGCTGGGCCGGCCGATGGAGGACGTGCGCGCCACCTACACCTTCGGCCGCGAGCTGGGCAGGGGCCAGTTCGGGGTCACCTACCTCGCCACCCACAAGTCAACCGGCGCGCGCTACGCCTGCAAGTCCATCGCGGCCCGGAAGCTGGCCCGCGCCGACGACGTGGAGGACGCGCGGCGGGAGGTGCAGATCATGCACCACCTCACGGGCCACCGC…	MGGRASRQRSDPPPPQAQQTPKQPNWPRPRHRRQPQPPPPQPPPPPQQPPPQPALPPDVGRVLGRPMEDVRATYTFGRELGRGQFGVTYLATHKSTGARYACKSIAARKLARADDVEDARREVQIMHHLTGHRSIVELRGAYEDRHSVNLVMELCEGGELFDRIIARGHYSERAAATLCREVVSVVHSCHSMGVMHRDLKPENFLFLNKREDSPLKATDFGLSVFFKPGEQFRDLVGSAYYVAPEVLKRRYGAEADIWSAGVILYILLSGVPPFWAENEEGIFDAVLKGHIDFSSDPWPSISNGAKDLVKRMLRQDPKERLTAAEILNHPWIREDGEAPDKPLDITVISRMKQFRAMNKLKKVALKIVAESLSEEEIVGLREMFKSLDTDNSGTITLDE…	CGCCACTCTGCCATGGATCGCTCGTCCTCCTCGGCGATGAGCAGGCGGCGCTGCCGACGGCGGTCCACATGGTCCTGGTTTGTTACCAGACGAGGCGGAGGGGCGACGGCCTGCGCCTGCTTGCGCGTGTAGACGTCGTGGAAGTTCATCTGGTCGTACGCGTGGGCGGCCTCGTGCGCGGTCTTGAACGTGTCGAGGCCGAGACGGACGTCACCGGACCGGATCTTAGCGTAGTAGACGCCGGAGGGGCGTTCGCAGACGCCTGTGTAGCCCGAAGATCCACGACGGTGCGACGACATGGTGGCTCGATGGGGGCGCTGTAGGGCAATAAGCCACGGCGAGCGGCAACGCGGAGCGCGTGCGTGCGCGCGGTAGACGCGTCATGCTCGGCCCGTGGCA…
HvSnRK-13	ATGGCCCAAAGAGGAAGCCTCGGAGAGACAGAAGCACATCTTTCCTGCGGCTCTGACGTGAAGATGCATGATGGCACGGAGAAGGGCACTGTCCTGATGAACCGCTATGAGCTTGGACGCATCCTGGGGCATGGAACATTCGCAAAGGTGTATCACGCTAGGAGCCTCATGTGCAACCACAGTGTCGCCATCAAGGTCATTGACAAGGAAAAGGTGTTGCGTGTGGGCATGATCGAGCGGATCAAGCGGGAGATCTCTGTCATGAGGCTCGTCCGCCACCCCAACATTGTCCAACTGCACGAGGTCATGGCCAGCAAGACCAAGATATACTTTGTCATGGAGCACGTCCGGGGAGGCGATCTCTTCAGCAGGGTAGCCAAAGGCCGGCTCAGGGAGGAG…	ATGGCCCAAAGAGGAAGCCTCGGAGAGACAGAAGCACATCTTTCCTGCGGCTCTGACGTGAAGATGCATGATGGCACGGAGAAGGGCACTGTCCTGATGAACCGCTATGAGCTTGGACGCATCCTGGGGCATGGAACATTCGCAAAGGTGTATCACGCTAGGAGCCTCATGTGCAACCACAGTGTCGCCATCAAGGTCATTGACAAGGAAAAGGTGTTGCGTGTGGGCATGATCGAGCGGATCAAGCGGGAGATCTCTGTCATGAGGCTCGTCCGCCACCCCAACATTGTCCAACTGCACGAGGTCATGGCCAGCAAGACCAAGATATACTTTGTCATGGAGCACGTCCGGGGAGGCGATCTCTTCAGCAGGGTAGCCAAAGGCCGGCTCAGGGAGGAG…	MAQRGSLGETEAHLSCGSDVKMHDGTEKGTVLMNRYELGRILGHGTFAKVYHARSLMCNHSVAIKVIDKEKVLRVGMIERIKREISVMRLVRHPNIVQLHEVMASKTKIYFVMEHVRGGDLFSRVAKGRLREEVARKFFQQLIAAIDFCHSRGVYHRDLKLENLLIDDTDNIKVSDFGLSALRESLGPDDLLHTTCGTPSYVAPEIINNKGYDGATADVWSCGVILFVLLAGYLPFHDSNLMEMYRKIGKSEFKSPHWFSYDVSKILGKLLDPNPETRITIEKLVEDPWFKAEYRPAVLLAQPHGSKSLKSVQYKPTIPLAQRHGSKSMKGVYVTISTEHKVNKCEQPEQSSNAMKPSSLNAFDIISLSHGFDISGLLEMQRKQKVPELFITQDPTSTI…	CAACCTCTCCTTTTCTGTGTCGCAACCTCGTCGTGCATCAGAAATGACCCGGCCAAGATCATCAGCGGGCTCATCTGGTTCCCGTTCTTCATCCTGATCTTCTTCTTCATTGTCTTCCATTGCGGTATCAGCATACTCAGGGAACATAGATCGGTAGTTGTCATCATCATTCTCTTCTTCTTCATCGTCGTCTTCCATCATAACCCCCCTTTCTCCGTGCTTGGTCCAAACATTATAGCCTGACATAAAACCGGACCGAAGCAGGTGGCTCTGAATGACTCTTGAGGAAGTGTAATCCTTCTCATTCCGACATTCAACACATGGACAAAACATATGGCCACCATCATGCTTGTTCGCATCGGCTGCATCTCGAAAAGAATGCATGCCTTCTCTGTAAGC…
HvSnRK-14	ATGTACAAGGCAAGGAGGCAAGCCTCACTCAAGGTGAGGCGACGAGTCGGCAAGTATGAGCTCGGGCGCACCATCGGGGAAGGGACGTTCGCCAAGGTCCGGTTCGCAAAGGACACCGAGTCCGGTGATCATGTTGCCATCAAGATCCTTGACAAGGCCAAGGTTCAGAAGCACGGGTTGGTCGAACAGGTCAGATCATTTTCTGATAATTTTCCTTGCTCATGCTCTGTTTCCTAGATTTTCCACAGCATAGAGAAAATTCCCTGCATCATGCTTTCTAGAACTGAGCTGTAATTATGCGCAAAAATAACTGCCCCTGTTCATTTCATTCTAAATGTAATCGAGAAAGGCTAGCTTACGGTCTTATGCTCTAGCTTGATGTTGACGCCGCTATGAACT…	ATGTACAAGGCAAGGAGGCAAGCCTCACTCAAGGTGAGGCGACGAGTCGGCAAGTATGAGCTCGGGCGCACCATCGGGGAAGGGACGTTCGCCAAGGTCCGGTTCGCAAAGGACACCGAGTCCGGTGATCATGTTGCCATCAAGATCCTTGACAAGGCCAAGGTTCAGAAGCACGGGTTGGTCGAACAGATTAGACGAGAAATCTGTACGATGAAGCTGATACAGCACCCCAATGTCGTCCGCCTGCATGAGGTGATGGGAAGTAAGGCAAGAATCTTCATCGTTCTGGAGTATGTTACGGGTGGAGAGCTCCATGACATCATTGCCGCCCATGGGAGCCTGAAGGAGGATGAAGCACGCAGATACTTTCAGCAATTGATCAACGCTGTTGATTATTGC…	MYKARRQASLKVRRRVGKYELGRTIGEGTFAKVRFAKDTESGDHVAIKILDKAKVQKHGLVEQIRREICTMKLIQHPNVVRLHEVMGSKARIFIVLEYVTGGELHDIIAAHGSLKEDEARRYFQQLINAVDYCHSRGVYHRDLKLENLLLDTAGNLKVSDFGLSAISEQAKADGLLHTTCGTPNYVAPEVIEDKGYDGAFADLWSCGVILFVMLAGYLPFEDDNVSALYKKISGAQFTCPSWFSDGAKRLIHRILDPNPSTRITIPQLLKDPWFKKGYKPPVFHEKYQTSLDDVDAAFGDSEVS	TCGTCGGTACGATCTATCGGTAACAAAATATGTAATTTGTTATCCATACCACGCAACATTTTTCACGATTCTTGGCATATAGTTATACAAATCGAAAACTCGACACTACTCCTCCCCGTTTCACAATACATCGTCGCGCGGGACACGGCGGGGGAACGCCGGTACAAGGCGGTGCCACCGCTTTGGTAGGGCGGAAAAGGCAGAAAGCCATAAACCCTTGCCCTTTGTTTTAGGGCTATATATATATATATATAGAGAGAGAGAGAGAGATAGAAAAAAGATCCTTGTATTTCCTATGGAAATGATTTATGGCGCCGTCCCATCACCATCAACGGTGCAGGTACGAGGGAGGGGGCGCAAAAGGATGGGGCCGTTTGTCCGGTCCGTCCCCACACGCCT…
HvSnRK-15	GCTGCACAACGCACTCCCTCGCACCTCACCACGCCGGCCTCTAGAAAAAGAAACAGAAACAGAAACAGACCTCCCAACCCAACCCCGAGCCGCAAATCTGCTGCAACGCAACCACTCCCCCGCCGCCCTCCTCCCTTCCGTACCCCGCCGCCCTCCTCCTCCTCGCGACTACTCATCTCGCCAGGGCTGCTTCTTGGCGGAGCGGTGGATCCGACCCACCGCCGCGCTGCTGCGGGCTCCGTTCGCGTCCGTCGCCAGCCGCCGGGATCTGGTACGGACTCGCTCGCTTCTCCCCGTTCCTGCCTCTCGATTCATGTGTATGTGTATGTGTATGTGTATGTGCGCCAACTCTGATGATGTCCAGAGACGGCTCGGCTATTCAGGAGTAGCACGGATTAA…	ATGGGGGAGCAGAAGGGGAATATTCTGATGCACAAGTACGAGATGGGGAAGATGCTCGGGCAGGGGACCTTTGCCAAGGTCTACCATGCCCGCAACATCGAGACCTCGCAGAGCGTCGCCATCAAGGTGACCGACAAGGAGAAGGTTCTGAAGGGCGGGCTCACGGACCAGATCAAGCGCGAGATCTCTGTGATGAAGCTGGTCAAGCACCCTAACATTGTTCAGATGTATGAGGTCATGGCGACCAAAACCAAGATTTACTTTGTGTTGGAGCATGTCAAGGGCGGTGAGCTGTTTAACAAGGTTCAGAGAGGAAGGCTCAAGGAAGATGCTGCAAGGAAGTACTTCCAGCAGCTGATCTGCGCAGTTGACTTTTGTCACAGCAGGGGCGTCTATCAC…	MGEQKGNILMHKYEMGKMLGQGTFAKVYHARNIETSQSVAIKVTDKEKVLKGGLTDQIKREISVMKLVKHPNIVQMYEVMATKTKIYFVLEHVKGGELFNKVQRGRLKEDAARKYFQQLICAVDFCHSRGVYHRDLKPENLLLDENSNLKVSDFGLSTISECRRLDGLLHTSCGTPAYVAPEVINRKGYDGAKADIWSCGVILFVLMAGYLPFQDKNLMNMYKKIGKAEFKCPSWFSSDIRRLLLRILDPNPSTRISIEKIMEHPWFRKGLDAKLLRYNLQAKDAVPASDMTATSDSLSSSNSAIEGKEQETKKLSNMNAFDIISLSTGLDLSGMFEDNDKKRESKFTSTNSASTIVSKIEDIAKGMQLKLVKKDGGMLKMEGSKPGRKGVMSIDAEIF…	GGTGGCGTCGCGCCGGCGCTGTCCCGTGCCGCCGCCGCACCGTCGAAGCTCCTCAATGCGGCACGGCCGAAGAAGGGAAAAACTTCCGAGAAGAAGAACAAGGCGGCGGACGGCTCCGGTAGCTCGAAGGGAAAGAAGCTTGCAGGGTGGCGGTGGCCTCGGCGCCATGGGAGGCATGGGTGGTTTTGGAGCCATGGGATGCATGGGCGCACCTCCGGCCGCCATGGGAGGCATGGGTGGCTTTGGAGCACCCTCCGACGCTATGGCCGCCATGGGAGGCATGAGTTTTGCTTCTCTCATGGGAGACATGGGTGCACCTCCGCCCATGGGTGGAAGGTCTTTCGATGTGCCTCCTCAGACACATTCCCATGAAGATGCCGTTGAAGATCTTGCCAACAC…
HvSnRK-16	AGAAACCCGAGACAGAGCGCGGCCGAAGACAGGATCCCAACTACCGCAAGAAACTCTCCGGCCAGTGAGCGAGGGAGCGAGCGGGCGATATCCAATATCTCTTCCGGCAGCCGATCCAGCTGGGGAAAATTACTACCTCACAGTCACGACCGCACACTGCGACGGCGGCGACACAGCACACCCCGCCGCCACGATGCCGTCCGCCTCCAGCGCCGTCCCATCCGCCGCGGCGCGGGGAGACGAATCGCAACCCCTCGCCGCCGGGGCAGCCCCGAATGTCCTCCTTGGTAGGTACGAGCTGGGCGGGCTCCTCGGCCGCGGCGCGTCCGCCAAGGTGTACCGGGCCAGGGACCTGGTCACGGGCCGGGACGTGGCCATCAAGTCCTTCCCCAACCCGCG…	ATGCCGTCCGCCTCCAGCGCCGTCCCATCCGCCGCGGCGCGGGGAGACGAATCGCAACCCCTCGCCGCCGGGGCAGCCCCGAATGTCCTCCTTGGTAGGTACGAGCTGGGCGGGCTCCTCGGCCGCGGCGCGTCCGCCAAGGTGTACCGGGCCAGGGACCTGGTCACGGGCCGGGACGTGGCCATCAAGTCCTTCCCCAACCCGCGCGCCGGCGGGCGCGAGTGCGAGGGCTCCGCCGCCATCGAGCGGGAGGCGGCCATCCTCGCCCGCCTGCGCCACCGCCACGTCGTGAGGCTGCACGAGATCCTCGGCACGCGCAAGAAGGTCCACTTCGTCCTCGACCTCGCCGCCGGCGGCGAGCTCTTCTCGCTCGTCGACTCCGACGGCCGCATGTCGGAG…	MPSASSAVPSAAARGDESQPLAAGAAPNVLLGRYELGGLLGRGASAKVYRARDLVTGRDVAIKSFPNPRAGGRECEGSAAIEREAAILARLRHRHVVRLHEILGTRKKVHFVLDLAAGGELFSLVDSDGRMSEDLARHYFRQLVSAVRYCHSRGVYHRDIKPENLLLDGEGELKVADFGLGAVADGSLHHTLCGTPAYVAPEILSKQGYHPAKVDIWSCGVVLFVLAAGYLPFNDASLINMYRKIYAGRFRCPNWFSPALRHLLRRILDPNPATRIDTDGIMEHPWFCHGAGGDGELEKLMCGHEEEAWFKTEFKEDMARDMTAFDILAFSPGSDLSGLFGPGPGTERVFVGEPAAAVLARVEDAGKKQGHRVRREGKNLAGPVYVEAEVGGIVAKVTV…	CATTCTGCATTGTCATCACCTCTGTCTCGACCTATTCTAGCCTTTGACTTCAGCGCCGCCCCTACGTTGTCATTGTCGCCTCCTTACTCGAGAGAAAATCTCAAAGAGATTGCACCTTTAAAACTTGAACTGTGATATGTAAAGATCACATTTCTTCGATCGACGCACGGGCTTCACCCTAAACTCTGACCATCGATGCACAAACCTTCCTTCTCCCTTGTTCGTCCTTACATGGTTGTATGTTTCTCTGTAAAAACATAGTTTTTTGGTAGGTTCCAATGCTGGATTATGGTTTGGTCTAGGCAAGGTCCAGAAAAACTTGTTGGGCAAAATTGCAATATTTGATTTTGAGTAATGCAAAAATTTATATAAAAAACACGTTTTTCTCCCGAAAAAAAA…
HvSnRK-17	ATGGGTCTCTGTCACGGGAAGCCCTCGCGAATCCCGGAGGCCGAGGCGGAGGAGGACCCGCGCGCGGCCTCCTCCGGCGCCCGCGATGCCACCGCCGCCGCTGCCGCCGCCTCGCCGGCGCAGGCACCCGCGGCGAAGCCGGGCACGCCCAAGCAGCCCAAGTTCCCCTTCTACCTGCCGAGCCCGCTCCCGGCGTCGAGCTACAAGGGCGGCTCGCCGGCCAACTCGAGCGTCGCGTCCACCCCCGCGCGCGGCGGGTTCAAGCGGCCCTTCCCGCCGCCGTCGCCGGCCAAGCACATCCGCGCGCTCCTGGCGCGGCGGCACGGCTCCGTCAAGCCCAACGAGGCGTCCATCCCCGAGGGCGGCGAGCCGGAGCTGGGCCTCGACAAGGGCTTCGGC…	ATGGGTCTCTGTCACGGGAAGCCCTCGCGAATCCCGGAGGCCGAGGCGGAGGAGGACCCGCGCGCGGCCTCCTCCGGCGCCCGCGATGCCACCGCCGCCGCTGCCGCCGCCTCGCCGGCGCAGGCACCCGCGGCGAAGCCGGGCACGCCCAAGCAGCCCAAGTTCCCCTTCTACCTGCCGAGCCCGCTCCCGGCGTCGAGCTACAAGGGCGGCTCGCCGGCCAACTCGAGCGTCGCGTCCACCCCCGCGCGCGGCGGGTTCAAGCGGCCCTTCCCGCCGCCGTCGCCGGCCAAGCACATCCGCGCGCTCCTGGCGCGGCGGCACGGCTCCGTCAAGCCCAACGAGGCGTCCATCCCCGAGGGCGGCGAGCCGGAGCTGGGCCTCGACAAGGGCTTCGGC…	MGLCHGKPSRIPEAEAEEDPRAASSGARDATAAAAAASPAQAPAAKPGTPKQPKFPFYLPSPLPASSYKGGSPANSSVASTPARGGFKRPFPPPSPAKHIRALLARRHGSVKPNEASIPEGGEPELGLDKGFGFSKHFFAKYELGEEVGRGHFGYTCAAKAKKGEHKGQDVAVKVIPKAKMTTAIAIEDVRREVRILSSLTGHSNLVQFYDAFEDEDNVYIVMELCKGGELLDKILARGGKYSEEDAKVVMLQILSVVSFCHLQGVVHRDLKPENFLFSSKEENSPLKVIDFGLSDFVKPDERLNDIVGSAYYVAPEVLHRSYGTEGDMWSIGVIAYILLCGSRPFWARTESGIFRAVLKAEPSFDEAPWPTLSAEAKDFVKRLLNKDYRKRMTASQAL…	GCAAGGACAGCCTGTGCGGTGCGGTGTGGCCTTTTTTGGATTGCAGAAGAGAAGGGTGGCTTCAGAGTTCAGATTCAGAGTGACACAGACATGAGGCTTCCTTTCAGTAAAATCTTGGAAATTGCTAAAATGTATATTTGATCAGTAATGATGAACAATCCATTAGCTCATGTTTTCTCCATAAATAAAAGTGGTATTAGCAAAAGTTGTGTTTTGTTGACATACTAAAAAACTCTTACCACAGACTAAAAAAATGCAGGCTAGAACAATAGTATTCCCTTCGTCCCATAATATAAGACGTTTTTTTTTACACTACACTGCATTATGGAACGGAAAGAGTAGGTAGTACTCCCTCCGTCCCAAAATAAGTGCCTTAAGCTTAGTATAAATTTATACTAG…
HvSnRK-18	AACGTTCTCCCAGCCTCCAGTCCACCCTACCACGGACGCGCGCGCGCGCTCTAGCTCGCTCTCGCTCCCGCGTCTTCTTGACCTTTCAGCCCGCCGAGAGGTGCCGGCAGGTCGGCGAACCCGCGCCCGCGCGCGCTCTCGCTCTCGAGTCGTAGCCGCTCTCGCGTCCTGACCTTTACCCCCGCCGAGAGGTGCCGGCAGGCCGGCGAACCCGCGCCGGCATGGCGGCGACGGAGGGAGCAATGCGGATGGGCAAGTACGAGATGGGGCGGACGCTGGGGGAGGGGCACTTCGGCAAGGTGAGGCTGGCGCGGCACGCCGACACGGGCCGGCCCTTCGCCATCAAGATCCTCGACCGCCAGCGCATCCTCGCCATGAAGATCGACGAGCAGGTGCGCG…	ATGGCGGCGACGGAGGGAGCAATGCGGATGGGCAAGTACGAGATGGGGCGGACGCTGGGGGAGGGGCACTTCGGCAAGGTGAGGCTGGCGCGGCACGCCGACACGGGCCGGCCCTTCGCCATCAAGATCCTCGACCGCCAGCGCATCCTCGCCATGAAGATCGACGAGCAGATAAAGACGGAGATCGCGACGCTGAAGCTGCTCAAGCACCCCAACGTCGTCCGCCTCTACGAGGTTGCCGCAAGCAAGACCAAGATATACATGGTCCTCGAGTACGTAAATGGTGGAGAGCTATTTGAGAAAATTGCACTAAAGGGCAAGCTGCCAGAGAAGGAAGGGAGGAAACTGTTCCAGCAGCTAATGGATGCTGTAAGCTATTGCCACGAGAGGGGGGTTTAT…	MAATEGAMRMGKYEMGRTLGEGHFGKVRLARHADTGRPFAIKILDRQRILAMKIDEQIKTEIATLKLLKHPNVVRLYEVAASKTKIYMVLEYVNGGELFEKIALKGKLPEKEGRKLFQQLMDAVSYCHERGVYHRDLKPENVLVDAKGNIKVSDFGLSALPQHQRKDGLLHTTCGSPNYIAPEVLLNKGYDGSMSDVWSCGVILYVMLTGNLPFDDENMVVLYQKILKGDYRIPKWLSPGAQDILRKLLDPNPITRLGMDGMRAHDWFNQCYTPAVPFDDDDDNYVGDDNSHMTKHNGIQDNPAINQMNAFQLIGMSSCLDLSGFFEKEDVSERKIRFASNYPPTYLFEKIESNVINMGFQVQKNNGKLKVIQERKGPTNPRGHGSLLISAEVFEINES…	GGAAGCAACCGCCCCGCGCCCACGCCCACGCCCACGCCCACTAGCCAACGCGCGCGCGGACCCGACGGCGCCAGGCAGGCGGCGGTTCACGGCCCGAATCTCCGCGAAACTACACGGAGGGGGGGCTCTGTCCGCCCGACGGTGCGGTGCCGAGCGGGGCGGGGACAACGCGGTCACCGCGCGGCCCCTGCCGGCCACGCACAGCCATACGCGCCGACCGGATCACCGGACTGCTCGACGGGATCAACGGGGTCACACCCACCGGCCCTACCTCACCCAACCCAACCCCACCCGGCCGCGATTTCTGATAGATAGTACGGATGTCGACGCACGGATCGGCGGATGGCAGGCTCTGGCAGCACAGCACAGGAGCAGACGCGCGGCCACCCCGCAGCCTCA…
HvSnRK-19	GTCAAAAGGAGCCCCAACCCTTCCACACCCGCAGCGCACTCCCCTCCCTCCCTCACCTTCCTCCCCCCCGCCCCCGCCCCCGCCCGGCCCCCTCCTCGCTCGGGTGCTTCCTCCCTCCCTCCTGGTGTCCACTCCACTCGCCACTGGCTCCGCTCGGTTCTTGAATCTTGGCCGACCTACCTGAGCCGGCAGCCACCGGTAGCCCGCCACCGCTTCTTGCTCCAGTGCCGTCTACGAGCTGCGGACGGACGGAGGGGGTCCGGGATGGAGCGGTACGAGGTGATCAAGGACATAGGGTCGGGCAACTTCGGCGTGGCCAAGCTGGTCCGGGACGTCCGGACCAAGGAGCTCTTTGCCGTCAAGTTCATCGAGAGGGGGCACAAGGTGAGCCCGAATTAA…	ATGGAGCGGTACGAGGTGATCAAGGACATAGGGTCGGGCAACTTCGGCGTGGCCAAGCTGGTCCGGGACGTCCGGACCAAGGAGCTCTTTGCCGTCAAGTTCATCGAGAGGGGGCACAAGATTGATGAGAATGTTCAAAGGGAGATTATGAACCACAGATCTCTGAGGCATCCGAACATTGTTAGATTCAAAGAGGTTGTGCTAACTCCCACACATTTGGCCATAGTTATGGAATACGCTGCTGGCGGCGAGCTATTCGAAAGGATCTGCGGTTCTGGAAAATTTAGTGAGAATGAGGCTAGGTTCTTCTTCCAGCAATTGCTTTCAGGAGTTAGCTATTGCCATTCCATGCAAATATGTCATAGAGATTTGAAACTAGAAAATACGCTCCTGGATGGC…	MERYEVIKDIGSGNFGVAKLVRDVRTKELFAVKFIERGHKIDENVQREIMNHRSLRHPNIVRFKEVVLTPTHLAIVMEYAAGGELFERICGSGKFSENEARFFFQQLLSGVSYCHSMQICHRDLKLENTLLDGSEAPRLKICDFGYSKSSVLHSQPKSTVGTPAYIAPEVLSRREYDGKVADVWSCGVTLYVMLVGAYPFEDPDEPKNFRKTITRILSVQYSVPDYVRISMECRHLLSRIFVANPEQRITIQEIKNHPWFLKNLPIEMTDEYQMSLHMVGVNAPPQSLEEIMAIIQEARIPGDGSKFAGQLSVPGLGSMELDDIDDVDADVEDSGDFVCAL	CCTGCAGCTTCATTCGTTCGCACACTATTTCCTTTGTTAATATCGTATGCTTCCTATAGATTGTAAACTTGCTTCCGTTCACCTATGGTCATCTTGATTGTAGGGCGGATCCAAGTGTCATCACACATCTAGGTGCATGCATCGATTGTCTCCATACATGTCTCCGGTGGTGCCTATTGGCTCCAAAGCCAACACACATCCGCTTGAAGCATACATCATAAAATATTTTTAGTGGAATCGAGCAACAAATGTGGCCAACATTTGTGTGTGCCGATCATTTTGTGATCTACAAACCAATTTCTTCCATCGATGCCAATAAACTGAAATGTCGAAGCATATTTATGATCTGTCGAAGCACATGTATGATGCCTATGAAGCATGGATAATGAAAACATCAAA…
HvSnRK-2	GCATCGTCAATCCGTCATCCATCCCACCACGCGCAACACGCCCTCCGGCCCGACCCGACCCGCCACGAGCGCGTCCCTCTCCGGGCAGCAGCGGGCAGCAGAAAGATGGTGGCGACGGGCGACGCGGAGGACGCGGCGGCGGGGTGCCGCGCGCGGGCGGCGCTGCTGGGCGGGTACGAGCTCGGGCGGACGCTCGGGGAAGGCAACTTCGGCAAGGTGAAGCACGCGCGGCACCGCGCCACCGGGGACCACTTCGCCGTCAAGATCCTCGACCGCGGCCGGGTGCTCTCCCTCCGCGGCGCCGACGACCAGGTCCGCCGCGAGATCGCCACGCTCACCATGCTCGCCCACCCCAACGTCGTCCGCCTCCACGAGGTAATTACTAATTACTAGTACTCT…	ATGGTGGCGACGGGCGACGCGGAGGACGCGGCGGCGGGGTGCCGCGCGCGGGCGGCGCTGCTGGGCGGGTACGAGCTCGGGCGGACGCTCGGGGAAGGCAACTTCGGCAAGGTGAAGCACGCGCGGCACCGCGCCACCGGGGACCACTTCGCCGTCAAGATCCTCGACCGCGGCCGGGTGCTCTCCCTCCGCGGCGCCGACGACCAGGTCCGCCGCGAGATCGCCACGCTCACCATGCTCGCCCACCCCAACGTCGTCCGCCTCCACGAGGTTGCTGCTAGCAAAACAAAGATCTATATGGTGCTTGAGTTTGTCAATGGAGGCGAACTTTTTGACAGGATTGCAATGAAGAAAAAACTATCTGAACGAGAAGGAAGGAGGCTTTTTCAGCAGCTAATT…	MVATGDAEDAAAGCRARAALLGGYELGRTLGEGNFGKVKHARHRATGDHFAVKILDRGRVLSLRGADDQVRREIATLTMLAHPNVVRLHEVAASKTKIYMVLEFVNGGELFDRIAMKKKLSEREGRRLFQQLIDGVSYCHGKGVYHRDLKPENVLIDRKGNIKISDFGLSALPQHLGNDGLLHTTCGSPNYIAPEVLQNRGYDGSLSDIWSCGVILYIMLVGNLPFDDRNMVVLYQKIFKGDAQIPEWLSPSAQNLLRRILEPNPRKRINMAEIKIHEWFQKDYIPVAPYDDDDEDVRLGAILPIKQQISEAPGDKSTHQMNAFQLIGMASSLDLSGLFEEEGVSQRKIRFTSAQPPKDLFDKIEVSATQSGFHVQRAHSKLKITGNCNGPNNPTPFLV…	AACATTCATTAAGCCAGAGGGCTTAATCGCAAAGATCTGTTAATCCATGGGTTCAGCAAAAAAAATGTAGGAACTTATTTGTGATTATGAGAAACCACGAGGGCTGAAGTGAAAACACCCGAAGAGATAAGGTTCTCTTTTTTTTTTCTCTCCGGAGCGGTTCCTCACGGGAATTTCTCCCGTAACCGAGCGCTGCGGGGCTCTATGCGATGGAGCGGTCGATCGACGGCAAGAGCGGCGAGGGCTGAGGGGCGGCGCGATGGCGTCCTCGGTGCGCGGCTGCTCAAGCCCATGGTCATCTCCGGCTGAGGCGAAGTGGGTCCATCGGCGTTGGCGGCGCGAGCCACGCCGCCAGCGGAGGCGGAGCCCAGAGGTGGCGGCAGGGCTGGCCACGGCCTG…
HvSnRK-20	ACCTTCACCGTTTCAATTCACTACCTCCGCACTCCAGTCCAGTCCCCACACTCCAGCTAAAAGCTCTCTCTCTCTCTCTCTCTCTCTCTCTCTCTCTCTCTCCTCCCTCCGCCATGGCCGCCTACTCTTCCTCCTCCTAGCGCCCCACCGCCACCAGCGCGATCCAGATCCTACCCAGCTCCATGGGGGGCTGCCACGCCAAGCCGCTCACCCACGACGCCGACCCGCCGCCAGCCGCGCCGGCCACGCCCCCGCCGGCATCCTCCGCCACGCCCGCCTCCAAGAAGCACTGGACGTCCTCACCCTTCTTCCCCTTCTCCACGCCGAGCCCCAGCCCGGCGCACCACCTCTTCTCCTCCTCCGCGGCCTCCCCGCGGACGGCCTCATCCAAGTCCCCGG…	ATGGGGGGCTGCCACGCCAAGCCGCTCACCCACGACGCCGACCCGCCGCCAGCCGCGCCGGCCACGCCCCCGCCGGCATCCTCCGCCACGCCCGCCTCCAAGAAGCACTGGACGTCCTCACCCTTCTTCCCCTTCTCCACGCCGAGCCCCAGCCCGGCGCACCACCTCTTCTCCTCCTCCGCGGCCTCCCCGCGGACGGCCTCATCCAAGTCCCCGGCGCCCGCGTCCAACACCCCGGCCAGGCGCCTCCTGCGCCTGCCCTTCCCGCCGCCGTCGCCCGCCAAGCACATCCGCCAGGCGCTCGCGCGGAGGCACGGGCCCTCGCGCCCGGCGATCCCCGAGGAGGGCGACAGCGACGGCGGGAGGGGCCTCGACAAGGGCTTCGGCTTCAACAAGGGC…	MGGCHAKPLTHDADPPPAAPATPPPASSATPASKKHWTSSPFFPFSTPSPSPAHHLFSSSAASPRTASSKSPAPASNTPARRLLRLPFPPPSPAKHIRQALARRHGPSRPAIPEEGDSDGGRGLDKGFGFNKGFAAKYDLGDEVGRGHFGYTCAAKIRKGARKGDAVAVKVIPKAKMTTSIAIEDVRREVKILKALAGHKNLVQFYDAYEDNEKVYIVMELCEGGELLDRILSRGGKYSEDDAKSVLVQILNVVAFCHIQGVVHRDLKPENFLFTSKDENSQLKTIDFGLSDFVKPDERLNDIVGSAYYVAPEVLHRCYSTEADVWSIGVIAYILLCGSRPFWARTESGIFRSVLKADPSYNEAPWPSLTPEAMDFVKRLLCKDPRRRMTAAQALGHPW…	GCGCGCTCCCTTTTATCTTTACTCCTCTCGCCTCCTTTGCCCGCTTCTACGCCTCCGCTTTTCGGCCCTCCCTTTCCTTTCCTTGTTGCTGCTCCGTAATCTAATGTCGCGCGTGGGCCCCGCCCGGTGGTACGGGAGGAGGGAGGGAGACAATTAAAGCCGCTGCGTTGCGTTGCTTTTGGAGGATGATGAGGTTGACGTCGTGCTGGGTCGGGCCGGGCATCGGGCCGCGCGTCGCACACACTGACACAATGGAGTATTCTTCTGTTGCTCTTTTAAGGCCCGGATTAAGATAGTACCATACCACCACTGCACACAATTCCCTACTGCTGCTGGAGTAGCGTACTGTAGTAGCTTCTTCGTGCAGGCAGATGATGATGATGATGATGCAGAAGAAGT…
HvSnRK-21	AGCCCCCTCTCTCTCCCCACACACCCACACCAGACGCGCACGCCGCCCACCATTTTCTTGATTTGGCCCGTTCCCCTCCCTGCTCTGCTCTGCTCTGCCGGCAGATCTCCTCCGGTCGGCCCCGCTGTCTTTTTTCCTGATTCCGGAAGATGGGCAACTGCTGCGCGACGCCGCCGGCGGTGGACGGCGGCGGCGCCGGGAAGCAGCAGCAGCAGCACAAGGAGCCGAAGCAGAGGAAGGGCAAGAAGCCCAACCCTTTCTCGATCGAGTACAACCGGTCGGCGCCGCCGGGGGCCTCCAGGCTGGTGGTGCTGCGGGACCCCACGGGGACCGGGCGGGACATCGCCGAGCGGTACGAGCTCGGCGGGGAGCTCGGCCGCGGGGAGTTCGGGGTCACCT…	ATGGGCAACTGCTGCGCGACGCCGCCGGCGGTGGACGGCGGCGGCGCCGGGAAGCAGCAGCAGCAGCACAAGGAGCCGAAGCAGAGGAAGGGCAAGAAGCCCAACCCTTTCTCGATCGAGTACAACCGGTCGGCGCCGCCGGGGGCCTCCAGGCTGGTGGTGCTGCGGGACCCCACGGGGACCGGGCGGGACATCGCCGAGCGGTACGAGCTCGGCGGGGAGCTCGGCCGCGGGGAGTTCGGGGTCACCTACCTCTGCACCGACCGGGACACCCGGGAGGCCCTCGCCTGCAAGTCCATCTCCAAGAAGAAGCTCCGCACCGCGGTGGACATCGAGGACGTGCGCCGCGAGGTGGAGATCATGCGCCACCTCCCCAAGCACCCCAACATCGTCACCCTC…	MGNCCATPPAVDGGGAGKQQQQHKEPKQRKGKKPNPFSIEYNRSAPPGASRLVVLRDPTGTGRDIAERYELGGELGRGEFGVTYLCTDRDTREALACKSISKKKLRTAVDIEDVRREVEIMRHLPKHPNIVTLRDTYEDDNAVHLVMELCEGGELFDRIVARGHYTERAAAVVTKTIVEVVQMCHKHGVMHRDLKPENFLFANKKETAALKAIDFGLSVFFTPGERFTEIVGSPYYMAPEVLKRNYGQEVDVWSAGVILYILLCGVPPFWAETEQGVAQAIIRSVIDFKRDPWPRVSDNAKDLVRGMLNPDPRRRLTAQQVLDHPWLQNIKKAPNVNLGETVKARLQQFSVMNKFKKHALRVIAEHLSVEEVAGIKDMFEKMDLNKDSMINFDELKLGL…	CACAAGGCATTCCTTCGGTGTCGGTGAGTTGCATGATCTCATGGTCATAGAAACAGACACATTGAAATGCACAAAGCAATAACATTAAACTCGATACAGATCAAACACTATGCTTAAGGTTTGGATCTTGTCCATCACATCGTTCTCCTAATGATGTGATCCCATTATTAAATGATAATTCATGTCTATGGCTAGAAAACCTTAGTCATCTTTGATCAACGAGCTAGTCTAGTAGAGGCTCACTAAGGACACAGTGTTGTTTATGTATCCACACATGTACTTGAATTTCCAATCAATACAATTATAACATGGATAGTAAATGATTATCATGAACAAGGAGATATGGTAACAACTAATTTATTACTGCCTCTATGGCATATTTCAACATAGACGAGGTAA…
HvSnRK-22	GTCCGATCTGGCGCGCATCGCCATCCCGCGCCGCTCGCTTCCCCGACACACCCCCTATGCCCACTGCCAAGCCGGCCCCGCAGTTTCACGTGGGCCACATGTCAGCCGCACGAGCCCCTCCCCGCCTCGGCCATCTCCGGCCATCTCCTCTCCTCCACCAATCCTCCTCCGATCCAATCCCCGAGTCTCCACGCCGCCGCATGCCGTCGTTGCTGCCGCCGTTTGCCTAGGCCTCTGCCGCCCCCATCGCCGGCGCGATGGGGAACACCTGCTCCGGCCCCAGCGCCACGCCGGATCGCCACGGATTCTTCAACACCGTCGCCGTCGCCGTACTCTGGCGCCCCGGCGCCGCCCGCGCCGAGCCGGCAGTCCCACAGCCCAACTCCTGCCCCTCCATAT…	ATGGGGAACACCTGCTCCGGCCCCAGCGCCACGCCGGATCGCCACGGATTCTTCAACACCGTCGCCGTCGCCGTACTCTGGCGCCCCGGCGCCGCCCGCGCCGAGCCGGCAGTCCCACAGCCCAACTCCTGCCCCTCCATATGCTCCTCCACCTCGTCCGCGGCCCCCGATCTCGAGACCATCGACGACTCCGACCTCTCCTCTCCCTCCTCCAATCCTAACAAGCCCAAGGTAAAGCGCGTCCAGAGCGCCGGCCTCCTCGCCGAATCCGTCCTCAAGCGCGACTCGGAGCGCATCAAGGACCTCTACACCCTAGGCAAGAAGCTGGGGCAGGGCCAGTTTGGCACCACCTACAAGTGCGTCGAAAAGGCCACGGGGAAGGAGTTCGCCTGCAAGTCC…	MGNTCSGPSATPDRHGFFNTVAVAVLWRPGAARAEPAVPQPNSCPSICSSTSSAAPDLETIDDSDLSSPSSNPNKPKVKRVQSAGLLAESVLKRDSERIKDLYTLGKKLGQGQFGTTYKCVEKATGKEFACKSIAKRKLVTEEDVEDVRREIQIMHHLAGHPNVISIVGAYEDAVAVHLVMELCAGGELFDRIIQRGHYSEKAAAQLARVIIGIVEACHSLGVMHRDLKPENFLFVNQKEDSPLKTIDFGLSIFFKPGGIYSDVVGSPYYVAPEVLLKQYGCEVDVWSAGVIIYILLSGVPPFWDESEQGIFEQVLKGDLDFSSEPWPSISKSAKDLVRKMLNRDPGKRLTAHEALCHPWVCVDGVAPDKPLDSAVLTRLKQFSAMNKLKKMALRVIAE…	TCGTGTTCTTTTCTCGTTTGTTTTCATCCGTAGTCGGACCCTGCTCTTCTTCGTGATGTTTATGTTGTACTGATGATACTCTGATGTAGCTTGTGGCGAGTGTAAGCCAATTCCATATACTCTTTTCTTCAGTACATGTACTTGTAACGATATTCATTCTTGTGAAACGACGAGATGCGCTTCTATCCCTGTCGAGGCCCTCGTGCCAAAATAAGGATAGGATCGCATCTTGGACGTTACACACATGTCTTGAAATTGTATCATGGGTGAGGCCATGTTCATGACTAAGATTTTGTCCCACTAGCACGTCATGAGCCCACCCATTACAAAATATTAAGCCTTTGTGAGAAATAACGAGAGCGCATTTTATTACAAGTGAACTAGTAGCTCTTTCCTTTG…
HvSnRK-23	CACGCGCGCGCGCACGACGCGACGCTCCTCCAAGCACCGCACCGCACCGCACCTTCGTCAGACGTCACCACGCACGCACGCACGCACGCGGCAGGACCGCGCTTCCTTCCTCGCCCCCTCCTCCTCCTCCTCCGCCTCCGGCCGCCTATACATACCACCATCTCCTCTCCTCTCCTCTCCTCTCTCCCCTACCGTTCCGCCATTAACCGCCACTACTACTAACGCCTGAATCTTGATCCCACTTCCATGCCTGCGACTCCACGAGTGCGCTGACAACCAACTACCACCAGACTCCATGCGGCATCGGCAGCAAGGGGAGGACAACAAGGAGCTCTTCGTGCAGTGGAGACCCTGCGACAAGAAGAGGTCCTAGTCGCCGGCGACCCGCAGCCGCAGGAA…	ATGGTTGATTCGAGCGCGGGTGGGAAGATGAGCGCGCATGGGGGCGGCGGCGGCAGGACGCGGGTGGGGAGGTACGAGCTGGGGAGGACGCTGGGGGAAGGGACGTTCGCCAAGGTCAAGTTCGCCAGGAACGTCGAGACCAGCGAGAATGTCGCCATCAAGATCCTCGACAAGGACAAGGTCCTCAAGCACAAGATGATCGCGCAGATAAAGCGCGAGATCTCCACCATGAAGCTCATCAGGCACCCCAACGTCATCCGCATGTACGAGGTGATGGCCAGCAGGACAAAGATATACATAGTCATGGAGCTTGTCACAGGCGGCGAACTTTTCGACAAAATCGCTTCGCGTGGGAGGCTCAAAGAGGACGACGCCAGGAAATATTTCCAGCAGCTCATC…	MVDSSAGGKMSAHGGGGGRTRVGRYELGRTLGEGTFAKVKFARNVETSENVAIKILDKDKVLKHKMIAQIKREISTMKLIRHPNVIRMYEVMASRTKIYIVMELVTGGELFDKIASRGRLKEDDARKYFQQLINAVDYCHSRGVYHRDLKPENLLLDANGTLKVSDFGLSALSQQVREDGLLHTTCGTPNYVAPEVINNKGYDGAKADLWSCGVILFVLMAGYLPFEDSNLMALYKKIYKADFSCPSWFSTSAKKLIKKILDPNPNTRITIAEVINNEWFKKGYQPPRFETAEVNLDDINSIFNESGDPAQLVVERREERPAVMNAFELISTSQGLNLGTLFEKQTVCSTSQIVHESSFL	GTGCCCTATGTAATGCCTGCATCGTTGCCATAGGGAATTTCTGCTCCCGTTCAACACTGGCTAGAACTCGGTCCAACTTCTCATAAGTTGGATTTGGTAAGTTATTCGCCCATGTATATTATCTTCCTGTGAGATCAATCTCTTGTAGGTCAAGACTTTCAATAATAGCGTTAAACATGGACAACCATCTCCGTCAAAATTATCATTAATTTTCTCCACTCTCCTTCTAATGATATTGAAATCGCCTTCGACTAGGATTGGTAACCTTCCATCCCCGCAAATCCTCGCTAAATCAGCGAGAAAGTCAAACTTGAACTCAGGTTGTGCAAGTCCATAAACTGCAACGAGAGACCACCTAAAGTCATCAACTTTCGACTTATAACGTGAAATTTGACTGCA…
HvSnRK-24	GGGAAAACCCCCGCTTCAAAACCCCCATCCCTTTCGCTCTCGGCTCCTCCCAAGAACAGGCGACCGATCGAGAGAGGAGGAGGAGGAAGGACGCTGCAGCGATGGGCAACTGCTTCACCAAGACGTACGAGATACCCATCACGTCGGGCACGTTCGACCGGCCGCCGCCGTCGTTCGGCCCGCAGCAGCCGGCCGCCGGGCACGGCACCGGCAAGCCCCCGCGGCCGCCGTCGACGGCGTCGGGGCGGCCGACGCTCCCGAAGCAGCAGCAGCCGCCGCCGCTGCCCAGGCCGTCCGGCCGGCCGCCCCTGCCGGGCTTCCTGTCCGGGTCGCTGTCGCGGAAGGTGCCGGTCGGCGAGATCGGCCCGGTGCTGCAGCGGCCGATGGCGGACGTGCGCG…	ATGGGCAACTGCTTCACCAAGACGTACGAGATACCCATCACGTCGGGCACGTTCGACCGGCCGCCGCCGTCGTTCGGCCCGCAGCAGCCGGCCGCCGGGCACGGCACCGGCAAGCCCCCGCGGCCGCCGTCGACGGCGTCGGGGCGGCCGACGCTCCCGAAGCAGCAGCAGCCGCCGCCGCTGCCCAGGCCGTCCGGCCGGCCGCCCCTGCCGGGCTTCCTGTCCGGGTCGCTGTCGCGGAAGGTGCCGGTCGGCGAGATCGGCCCGGTGCTGCAGCGGCCGATGGCGGACGTGCGCGCGCTCTACAACCTGGAGCGGAAGCTCGGGAGCGGCCAGTTCGGGACGACGTACCTGTGCACGGAGCGCGCCACGGGGCTCAAGTACGCCTGCAAGTCGGTG…	MGNCFTKTYEIPITSGTFDRPPPSFGPQQPAAGHGTGKPPRPPSTASGRPTLPKQQQPPPLPRPSGRPPLPGFLSGSLSRKVPVGEIGPVLQRPMADVRALYNLERKLGSGQFGTTYLCTERATGLKYACKSVSKRKLVRRADVEDMRREVTILQHLSGQPNIAEFRGAFEDAENVHLVMEFCSGGELFDRITAKGSYSERQAAAVCRDILTVVHVCHFMGVLHRDLKPENFLLASPADEAPLKAIDFGLSVFIEEGKVYKDIVGSAYYVAPEVLHRNYGREIDVWSAGVILYILLCGSPPFWAETEKGIFDAILVGQVDFSSSPWPTISESAKDLIRQMLNRDPKRRITAVQALEHPWLKEGGASDRPIDSAVLLRMKQFKAMNKLKQLALKVIAENL…	GTGCTAGACATGCCACACATTTCAGTTGGATCTAATAGGTCCGATTTGATGGCAAAATCATGCCCGGGAGCTGCACAACAGTTTGAGGCCGACACGGGACCTGGTTGTAGATGCTCTTCGATCATCTCGAATAGATCATGTATATTGCCTCTTCACCTAAAATAACCGTTGTTTTACAGGCTCGAGATAGAAAAGTCGTTCTGACCACGTGTAGAGCGGCTAGTCCATAAACTTTTTAAATGGGAGTTGTATATCTCATCCCTCATCCATCATATTTTCAGGATTTCCCCCTCCTTTTAAAGTTTCCTTTATCCCTTACGTGGCTTGGTGAGAGGAAAATTTACAACTTGCGTAAAGTTTCCCCTTATGCAGGGACATCCTCACCGTCGTCCACGTCTG…
HvSnRK-25	CTTTCCCCAGACCAAACGTGACCCCGGAGCGGAGAAGAAGCCGCCATGAAGCAGCCTCCTCCGCCTCTGCCTCTGCCCGCTGCCGCTGCCGCTGCTTTCCCACCTCCTCGTTAAATCCATCCTCCCCAACGAGCCCCACCCTCTCCTCCCCCCTCCCCTCCCCTCCCCTCCCTCCTCCACCCAGCCAGACCAGAGCAGAGGAGAGGAGAGCCTCCACCCCATCCAGGTCGGTTTCGCCGCTTTGCTCCCGCTGACGGTTCCGTGAGAGCGAGGCGACCACCAACCAACAGCGGAGTGGGCCGACGGAGCTTTGATGCGCCAGGCGCGGCCTCCCCCCGTCCTTTGATGGGCAACGCATGCGGCGGTTCCCTTAGATCCAAGTACCTGCACAGCTTCAAG…	ATGGGCAACGCATGCGGCGGTTCCCTTAGATCCAAGTACCTGCACAGCTTCAAGCACCCCGCCTCCCAGCGCCACGACCCCGACCGCGACTACGACCCCAACCCCAACCCCAACCCCGCCGCCGCAGCCGACTCCCCGAAGAAGACCAAGCCGGCCGCCAAGACGGACGGCCACGCGGCCCCCGCGCAGCCCGCCGCGGCCATGAGGCGCGGCGGGGCGGGCGCCCCCGCCGACCTCGGCTCCGTCCTCGGCCACCCCACGCCCAACCTGCGCGACCTCTACGCGCTCGGCCGGAAGCTCGGGCAGGGCCAGTTCGGCACCACCTACCTCTGCACCGAGCTCGCCACGGGGGCCGACTACGCCTGCAAGTCCATCTCCAAGCGCAAGCTCATCACAAAG…	MGNACGGSLRSKYLHSFKHPASQRHDPDRDYDPNPNPNPAAAADSPKKTKPAAKTDGHAAPAQPAAAMRRGGAGAPADLGSVLGHPTPNLRDLYALGRKLGQGQFGTTYLCTELATGADYACKSISKRKLITKEDIDDVRREIQIMHHLSGHKNVVAIKGAYEDQLYVHIVMELCAGGELFDRIIQRGHYSERKAAELTRIIVGVVEACHSLGVMHRDLKPENFLLANKDDDLSLKAIDFGLSVFFKPGQIFTDVVGSPYYVAPEVLCKKYGPEADVWTAGVILYILLSGVPPFWAETQQGIFDAVLKGVIDFDSEPWPVISDSAKDLITRMLNPRPAERLTAHEVLCHPWIRDHGVAPDRPLDTAVLSRIKQFSAMNKLKKMALRVIAESLSEEEIAG…	GATGGATGTATAGCTTCCTACATAAACACAAGAAATAAAGTATTGGAACCGAATGCATTTTGCATTTATAAAAAAGGGTGTGTTCAAGACACATCTAGATATGACATAGTTATTACACATCTAAATGACTAAATCAAATATATATAAAAAGAAGAAAATACCCACATGAATTTTTACATAAGATCAATGATATAGGACTTAGATATACAATATTTTTCTCACATCTAGATGTATTTTAACAAAATTGTATAAGAAAATTCCCTCTAAATCCTCTTCCCTACGTTTTTACCCTGAAAATCCTCGAAAACCAAACGAGGACTACATTCTAGCTCGTGCCACGTGTACTCAGTCAGTCAAAGATTCCGGCGAGTCAAAGCCAGCAGATGGACACATATATGC…
HvSnRK-26	CCGACGTCTCCTCTCCTCACCTCAAGGCTCGGCTCTCGAGTTCGCCCCCATCCTCATCCCTCATCCCCCCCACCTCGAGTATCCCCAGCGGGTTCCGGAACCCAGTAACACCGTCCTGCTCCCTACTACACCCTCCTGCTGCCTGCTTCTTTTGAGAGAGAGAGAGAGAGAGAGAGAGAGAGCTGGAGCGACCAGGAGGAGGGAGAGGGGAAGGATGGATCGGTACGAGGTGGTGAGGGACATCGGGTCAGGGAACTTCGGGGTGGCGAAGCTGGTGCGGGACGTCAGGACCAGGGAGCACTTCGCCGTCAAGTTCATCGAGCGAGGCCACAAGGTAAACTCCCGGCAAGCAGCCTCTCCTACGCAAACGATCGGAGGCTGGCGCAAATAGTTCTCCTG…	ATGGATCGGTACGAGGTGGTGAGGGACATCGGGTCAGGGAACTTCGGGGTGGCGAAGCTGGTGCGGGACGTCAGGACCAGGGAGCACTTCGCCGTCAAGTTCATCGAGCGAGGCCACAAGATTGATGAACATGTTCAAAGGGAGATTATGAACCATCGGTCACTCAAGCATCCAAATATTATTCGATTCAAGGAGGTAGTGCTAACTCCCACACATTTGGCAATAGTTATGGAATATGCCTCTGGCGGTGAGCTATTTCAAAGGATTTGCAATGCAGGGAGATTCAGCGAGGATGAGGGAAGGTTCTTCTTCCAACAATTGATTTCTGGAGTGAGCTATTGTCACTCGATGCAAGTATGTCATAGAGATTTGAAACTAGAGAATACTCTCTTGGATGGT…	MDRYEVVRDIGSGNFGVAKLVRDVRTREHFAVKFIERGHKIDEHVQREIMNHRSLKHPNIIRFKEVVLTPTHLAIVMEYASGGELFQRICNAGRFSEDEGRFFFQQLISGVSYCHSMQVCHRDLKLENTLLDGSVAPRLKICDFGYSKSSVLHSQPKSTVGTPAYIAPEVLSRREYDGKVADVWSCGVTLYVMLVGAYPFEDPDEPRNFRKTIARILSVQYSVPDYVRVSMDCIHLLSRIFVGNPQQRITIPEIKNHPWFLKRLPVEMTDEYQRGMQLADMNTPSQSLEEAMAIIQEAQKPGHNALGLAGQVACLGSMDLDDIDFDVDDIDIENSGDFVCPL	GTAACATGGTGGATACGTTGAGGCCATCTTAGCAGTAGCAGCGTTTATTGCCCACGCGTTGCTGCTAAAGTTGTATCAGTAACGCATCTACCTGACACTATCTACTGTAAAATAGCACTAGCGCGTCTATCGGACATGTGCTATAGTTAGTCCTTCAAATATAAAGTTTTCCCTCATAGTAAGGTGTTGGTCCTAGAAAAAACAGTCACCCGGTTTTCTAAAAAAACAAGAATTATAAAAAGTCATGAATTTGAAAAGATGTTCATAAATTTTAAAAAATATTCTTAAAATGTTCACAAATAAAAAAGAACTTGAAGAATTAGAAAATCTTCACAATTTTTTTTAAATCTTCACAAATTTCATAAATTGTTTATGAAATTGAAAAATATTCATGAATTT…
HvSnRK-27	GGCAACAAACTCCTCCAAAAAGAAGACAATAAAGCACACGCACTTAGTATCTTGCCGGCCATGGGGCCGGAAGATTCACCGGCTGCCGACGGCTACTCCAAGGTCCTGCAGGGCCGGTACGAGCTTGGCCGCGTGCTCGGCCGGGGTGGATCGTCCAAAGTCTACCGCGCGCGCGACATCCGCACGGGCGTCTTCGTCGCCGTCAAGGCCATCCGGAAGCCACACCACCCGTTCTCTCCCGAGATGGCCGCCACGGCAAGGCGGTCCGTGGAGCGGGAGCTCGCCGCGCTCCGCCGCGTGAAGGGACACCCACACGTCATGCGCCTCTTGGACGTCCTGGCATCCCGCTCCACCGTCTACCTCGTGCTAGAGCTGGCCCGCGGCGGCACCCTCCTGTCC…	ATGGGGCCGGAAGATTCACCGGCTGCCGACGGCTACTCCAAGGTCCTGCAGGGCCGGTACGAGCTTGGCCGCGTGCTCGGCCGGGGTGGATCGTCCAAAGTCTACCGCGCGCGCGACATCCGCACGGGCGTCTTCGTCGCCGTCAAGGCCATCCGGAAGCCACACCACCCGTTCTCTCCCGAGATGGCCGCCACGGCAAGGCGGTCCGTGGAGCGGGAGCTCGCCGCGCTCCGCCGCGTGAAGGGACACCCACACGTCATGCGCCTCTTGGACGTCCTGGCATCCCGCTCCACCGTCTACCTCGTGCTAGAGCTGGCCCGCGGCGGCACCCTCCTGTCCGCGATGGACGAACGCGGCCGTTTCGACGAGCCCACGGCGCGCCGCCTGTTCGTCCAGCTC…	MGPEDSPAADGYSKVLQGRYELGRVLGRGGSSKVYRARDIRTGVFVAVKAIRKPHHPFSPEMAATARRSVERELAALRRVKGHPHVMRLLDVLASRSTVYLVLELARGGTLLSAMDERGRFDEPTARRLFVQLVSALAHVHSRGVFHRDVKPENLLLDEHGDLKLTDFGLCTLAGRHLGADGLAATRCGSPAYVAPEILYKKRYDAGKVDVWSSGVALFSLTAGYLPFNDANLMGMYRKIFSGRFRCPRWFSPELRCLIGRMLDPNPDTRIKIGEIMEHPWLQQDGTSSFGNIIRAGSSDPRPEVMKWEAEMEQVRGLNAFHIIAFASGCDLSGLIGPLPDRVRFAVEGVDIGSVLDKAEEIGREEGFVMRRKEEVGCGGVMFEAIGKEIIALVRVSRL…	GATCCTTATTGACACAACTGCAATCTCCAACTCGATTCATATTTGGAACGTCAAGGTCCCCTTAAGAATCAAAGTCTTCAAGTAGTTTATTTACAAGAAGATGATTATGACTTAAGGATAATTTGGCAAAGCGTAATTGGCAGGGAAATACACCATGTTGCTTTTGTGATCATGAGGAAATCATCAAACACCTTTTGCTCCATTGTCCGTTAGCAAAGATTTTATGACAAATAATTCGCATAGCCTTTAATATCATTCCTCCAGATAGCATTGATACGTCGTTTGGTACGTGGCTAAATGAGTTTGACATAAATTCCGCTAGAAATATTCGCATAGGAGTGTGTGAACTTCTCTGGGCTATATGAAACTGTAGGAATGACATGGTTTTTAACAGACAAA…
HvSnRK-28	CTGTGATTGATTTGATTAGTAGGAGGAGTAGGATAAGTTAGCCAGCCGCGCACCCAACGCACCTGCTCCCTCCTTCCCCAATCCCCACTCATCTTCATCATCATCATCAGCAGCAACCCCCACGTCCACAGTCCACACACACCCCAACGCACCCGCCCCTGTTTATCTCCTCCTCCTCTTCATCATCTTCTTCCTCCTCTGTTCTCTTCTGCTCTGCTCCAGCCTCCAGAGAGATAGCAACTCATCGCAAGACAAGTAACCGATCGAGGGAGAGAGAGAGGTCAGGCATGGACAAGTACGAGCCGGTCCGGGAGATTGGGTCGGGCAACTTCGGGGTGGCCAAGCTGATGCGCAACCGGGACACGCGCGAGCTCGTCGCCATGAAGTTCATCGAGCGAG…	ATGGACAAGTACGAGCCGGTCCGGGAGATTGGGTCGGGCAACTTCGGGGTGGCCAAGCTGATGCGCAACCGGGACACGCGCGAGCTCGTCGCCATGAAGTTCATCGAGCGAGGATACAGGATCGACGAGAACGTGTTCCGGGAGATCGTGAACCACCGGTCGCTGCGGCACCCCAACATCATCCGCTTCAAGGAGGTGGTGCTCACGCCCACCCACCTCGGCATCGTCATGGAGTACGCCGCCGGCGGCGAGCTCTTCGAGCGCATCTGCGACGCCGGCCGCTTCCACGAGGACGAGGCGCGCTACTTCTTCCAGCAGCTCGTCTGCGGCGTCAGCTTCTGCCACGCCATGCAGATCTGCCACCGCGACCTCAAGCTCGAGAACACCCTCCTCGACGGC…	MDKYEPVREIGSGNFGVAKLMRNRDTRELVAMKFIERGYRIDENVFREIVNHRSLRHPNIIRFKEVVLTPTHLGIVMEYAAGGELFERICDAGRFHEDEARYFFQQLVCGVSFCHAMQICHRDLKLENTLLDGSPAPRLKICDFGYSKSSVLHSRPKSTVGTPAYIAPEVLSRREYDGKHADVWSCGVTLYVMLVGGYPFEDTKDPKNFRKTIARIMSVQYKIPEYVHVSQTCRHLLSRIFVADPRKRITMAEIKAHPWFLKNLPRELKEEAQQAYYNRRHVDVVAPSSNNGTGAGAGASSNGAAAAVTAPAPAYSAQSVEEIMKIVQEAQTVPKPDKPVTGYGWGTGDGEASDEDDGNQEGEEEEEYGEDEYDRTVREVHASGDFGMSKLQI	CCTATATTTGAATTGAACATGAGAAAGATTAGACAGCTTAAATGTTTGAGACCGGTTTAAGAGTTTCGATTTTTTTTCTCGCCCAGGTTTGAGACGCGCTCTACTGCCCAATCAGAAAATCTGTCCGATCCTGCCGGTGCAGCGGACGACGACCCCACCGTCCACTCAACCGTCGGCATCTTGGTTCCTGTGCCATGCATCTTGGTCGCACAAGTTTGATTGTCTTCATCCGTTGATGCCGTGATGGCCAGGATCACATCACATGCAGGTTAATTAAGGCATCAGCTCAGTCCTTTTCACCTTTGATGGTTTACTACTACAGTTGGCCGTGTTATTCAGCTACACGTAGCTGCTGGTGAATACATCGGATCTGACAGGGCCAAAAATATCCGGCCTGTC…
HvSnRK-29	ATGGCGCGGATGGCAAGCAAGGGGGCCAGCGGGCGCGAGCGCGAGGCGGGGAAGAAGGCGCTGCTGCTGGGGCGGTTCGAGGTGGGGAGGATGCTGGGGCAGGGCAACTTCGCCAAGGTGTACCAGGCGCGCAACGTGGCCACCGGCGAGGAGGTGGCCATCAAGGTGATCGAGAAGGAGAAGGTGTTCAAGTCCGGCCTCACGGCGCACATCAAACGCGAGATCGCCGCGCTCCGCCGCGTGCGCCACCCGCACATCGTGCAGCTCTACGAGGTCATGGCCACCAAGCTCCGCATCTACTTCGTCATGGAGTACGTGCGCGGCGGCGAGCTGTTCGCGCGCGTTGCCAAGGGCCCCCTGCCGGAGGCCGAGGCCCGGCGCTACTTCCAGCAGCTGGTC…	ATGGCGCGGATGGCAAGCAAGGGGGCCAGCGGGCGCGAGCGCGAGGCGGGGAAGAAGGCGCTGCTGCTGGGGCGGTTCGAGGTGGGGAGGATGCTGGGGCAGGGCAACTTCGCCAAGGTGTACCAGGCGCGCAACGTGGCCACCGGCGAGGAGGTGGCCATCAAGGTGATCGAGAAGGAGAAGGTGTTCAAGTCCGGCCTCACGGCGCACATCAAACGCGAGATCGCCGCGCTCCGCCGCGTGCGCCACCCGCACATCGTGCAGCTCTACGAGGTCATGGCCACCAAGCTCCGCATCTACTTCGTCATGGAGTACGTGCGCGGCGGCGAGCTGTTCGCGCGCGTTGCCAAGGGCCCCCTGCCGGAGGCCGAGGCCCGGCGCTACTTCCAGCAGCTGGTC…	MARMASKGASGREREAGKKALLLGRFEVGRMLGQGNFAKVYQARNVATGEEVAIKVIEKEKVFKSGLTAHIKREIAALRRVRHPHIVQLYEVMATKLRIYFVMEYVRGGELFARVAKGPLPEAEARRYFQQLVSAVAFCHARGVYHRDIKPENLLVDDAGDLKVSDFGLSAVAEQMRHDGLFHTFCGTPAYVAPEVLSRRGYDAAKADLWSCGVVLFVLGAGYLPFQDRNLVGMYRKIHRGDFRCPKWFSPELLRLMHRVLDTKPPRRATVDEIMDNEWFKVGFRRFSFRIEDDRSFTCFDLDDGDAYAPTSPPDTPRTTDGSDYGDATDQQQRISGGMTSCGSAPSLLEGRFGQLGGSSRRRSSLNAFDLISFSPGFDLSGLFEDGGGEGSSGEGEQQ…	TAATTATATCCATGTTATTGCGTTTTTTTAAGTACATTTCTGCCAAATGTTTATCCATTCTTGAAGTTTTCTCTCGGCATTTTCTATGTGCCAAGAGGTAGCCATAATGATTTTCCTTCCGTTTTGTTTAAGCCCGTGAAAGTTTCATCGTGTCGACCATGCAGCGCGCCCTTGTGATTTGTGAAAACAAAACGCAAAGTCAAAACAATGGGCACGGGCACTGTGGAAAAGTAGTTTCTTGTGTTTGTTTGGAGAGAAGAGGAAGGGAGGGTGGGAAGGAACCGAATAGACTCGACGTAAACCGTCCCCTGGTAATCTGGGAGGCTGCTACGACCACACGACATTCCTTCTGTTTGTGTTCTTGAGACCAACTGACCTTGGAGCAACAAAAAGGCCACT…
HvSnRK-3	AGTCAGTCCTCCTCTCCTCCCCCTCCCCCTCCCCCTCGCGTCGCGTCTCCTCCTCCGTTCACCGCCGCGCCCGCGGCCAGCCAGCAAGGCAGGCGCGTACGTTACCTCTCCTGCTCAGCCAGCCAGCCAGCCAGCAATTCATCACGCGCATTACCATTTCTTGTCTCATCTCTTCTCCCCGCATTAATACTTGATTTTTGGCTCGCTCCTCCATCCCGTCCCCGTCCTATAAATCCCAACCCCTCCGCCCCCCGCTCGCTCCCCTTCGACCCGCCCCAAACCCCGCCGCATTCCTGCCGTTTCCGTGTTCGCCGCCGCGCCTCCGGTGATCGGCGCCGGGGGAGCCATGGGGCAGTGCTACGCCAAGAACATACACGCGGACGGCGCGGATGCGGGCGA…	ATGGGGCAGTGCTACGCCAAGAACATACACGCGGACGGCGCGGATGCGGGCGAGGGTGGTGCTGCCCGAGGGACGACCACCATCTCGGTCTCGGCGTCTGCCGTCCAGGAGGAGCCCGCCGGGGAGATGGCCGCGGGAGGGAGGCGCAGCAGCAGGCCGTCGCCGGCGGGGACGCCGCGCAGCAGGGCGGGGGTGACGCCGGCCAGGACTTCGGCTTCGGCGGCGGCCGCGGCGGGGAGCCCCTGGGCGGCCAGCCCGCTCCCCGAGGGCATCGCGCCGTCCCCGGCCACGTCCGCGTCCACGCCCAGGCGCTTCTTCCGCCGCCCGTTCCCTCCGCCGTCCCCGGCCAAGCACATCAAGGCGTCGCTGGCGCGCCGCCTCGGCCACCGCTCCCCGGCT…	MGQCYAKNIHADGADAGEGGAARGTTTISVSASAVQEEPAGEMAAGGRRSSRPSPAGTPRSRAGVTPARTSASAAAAAGSPWAASPLPEGIAPSPATSASTPRRFFRRPFPPPSPAKHIKASLARRLGHRSPAATSAQAPPAKPPQEVPIPENGAGGGGGGEEELDKSFGYDCHFAVMYELGKEVGRGHFGHTCLARARKGDMRGQVLAVKVISKAKMTTAISIEDVRREVKILKALSGHSNLVKFYDACEDALNVYIIMELCEGGELLDRILSRGGRYTEDDAKVIIKQILSVVAFCHLQGVVHRDLKPENFLFSTRDEHSPMKLIDFGLSDFIRPDERLNDIVGSAYYVAPEVLHRSYSTEADMWSVGVITYILLCGSRPFWARTESGIFRSVLRAD…	CATTATGGTGTAAAGCTCCGGGCAAGTGCCGGGGTCTTCAGTTAGGTTGTGAAGATCGCCCTGAGCAATTTGTACGGGTACCGGTGACGGTCCCCAAGGGTTGCCAAAATGTACGGGTTCGGTGACCGCCCCAAGGGTTGCCATTTGTACGGGTTCGGTGACCGCCCTCAAGTGTTCCTTATTGGAATCAGGACATCTTGCATTGTGCGAGGGTATGAGGAGATTACGGTGGCCCTAGTGGCTTCTTGGGGACATTGTTCCTTCACACCGCTTCAAATGGAGATTAGCATCCGCAAGGGTGTGAACTTCGGGATACATCGTCGTCTCTGCGTGCCTCGATTATCTCTTACCCGAGCCCTTTACTTATGCACTTTACTTTGTGATAGCCATATTGTTTTC…
HvSnRK-30	ACAATGTACCAGGCTTTATTTTTAGGCGGCCTGTTCCAGCTCCAGAGAGAAGGGCAAGCTCCTGGCCTCATGTCGCGAGGAAAGCTCTAGCCACCGCAGACTATTCTTCTCTCCCGCCATCCTCTCCATCATCCTTGGAGGATTCTGAGAAAACAGACCAGTCGTGTATTAGTTTTCCCCCCAATCACAGCGCGCTCTCGCCCTTCACCTCTCCTCCCTCTCGGGGAGGGAGGAACACAGAGGGACGAAGTGGCGCAGAGTAGACGCTTGTGAATAGCCAATTTTTTTACCTCCAGTTTGCTGCTGCTCTTGTGCCCAAGAATCCGATAAGATGGAGAGGAAGTCCACCATCCTCATGAACCGGTATGAGCTTGGCCGTATGCTCGGGCAGGGCACCTT…	ATGGAGAGGAAGTCCACCATCCTCATGAACCGGTATGAGCTTGGCCGTATGCTCGGGCAGGGCACCTTCGCCAAGGTGTACCATGCGCGGAGCCTTGCCACCAACCAGAGCGTCGCCATCAAGGTCATTGACAAGGAGAAGGTGTTGCGTGTCGGCATGATTGACCAGATCAAGCGGGAGATCTCCATCATGCGCCTCGTTCGCCATCCAAACATCGTCCAGCTGCACGAGGTCATGGCCAGCAAGAGCAAGATATACTTTGCGATGGAGTATGTCCGGGGCGGCGAGCTCTTTGCCAGGGTAGCCAAGGGTCGGCTCAAGGAAGATGCTGCAAGGAAGTACTTTCAACAATTGATAGGGGCTGTGGACTTCTGCCACAGCCGTGATGTCTATCACCGG…	MERKSTILMNRYELGRMLGQGTFAKVYHARSLATNQSVAIKVIDKEKVLRVGMIDQIKREISIMRLVRHPNIVQLHEVMASKSKIYFAMEYVRGGELFARVAKGRLKEDAARKYFQQLIGAVDFCHSRDVYHRDLKPENLLVDEHGNLKVSDFGLSALKECQKQDGLLHTTCGTPAYVAPEIINKKGYDGEKADIWSCGVILFVLLAGYLPFQDSNLMEMYRKISKGDVRYPQWFSSDARKLLCRLLDPNPNTRITMDKLIEHPWFKKGYKPAVMLGTPRASKDLNDVQAAFSTDHKDGEGSRAEQPNSPLKPASLNAFDIISLSKGFDLSGLFEKDQEQKSNSRFMTQKPASAIVSKLEQIAETESFKVKKQDGLVTLQGSKEGRKGQLAIDAEIFEV…	GCATGACAATTCGACCATTTCAAATATGTTCTTTTCTTGCATCATTGCATGTCTCTCTGTTGCTCGGTGAAAACGCGCACCAATTATTGAGAAGCTACTCACCCGCCAAATATTTGCATGTACAAATTATGGAATTCAGATGATATTTTTAATCTAGCTTGTTGCAAATCATGCACTCGACACCTGGCACAACCATGACCTACAGCTACACCAAACTGGGCATTCATGTGTATGTGTGGCCAAAAAAAGAAGTGACACTACTAAAATTTAGCGTCAAACTTATGTCCAATCGATGAGCATCTTCATGTGACAACCAGACAGTAATGGTGAAAGAAATATATTGCGATCAACATATGGTCGGTGAAGGAACAGCGCGATCTCATCCACGGCTGAAACAAA…
[truncated: 150 more rows]

## Sheet: Table S4
Table S4. Prediction Subcellular Localization of the HvSnRK and HvLEA through WOLFPSORT
Gene rename	nucleus	cytoplasm	mitochondria	vacuole	cytoskeleton	Chloroplasts	endoplasmic reticulum (ER)	plasma membrane	Golgi apparatus	peroxisome	extracellular space
HvSnRK-71	6	4	0	0	2	2	0	0	0	0	0
HvSnRK-73	1.5	0	1	1	2	3	2	2	0	0	0
HvSnRK-74	6	2	0	0	2	4	0	0	0	0	0
[truncated: 171 more rows]

## Sheet: Table S5
Table S5. Nuclear localization signal (NLS) was predicted against HvSnRK protein
[truncated: 47 more rows]

[truncated: 3 more sheets: Table S6, Table S7, Table S8]
