# Supplementary material for: Genome-wide identification, characterization and evolutionary analysis of SNF1-related kinase (SnRK) and late embryogenesis abundant (LEA) protein-encoding genes in Hordeum vulgare under drought stress
Source: Research Square preprint supplement (doi:10.21203/rs.3.rs-7348463/v1), 2025-09-12
Supplement: Supplementary file 1 [file f4ae14fb9562d6229968ff7c.pdf]

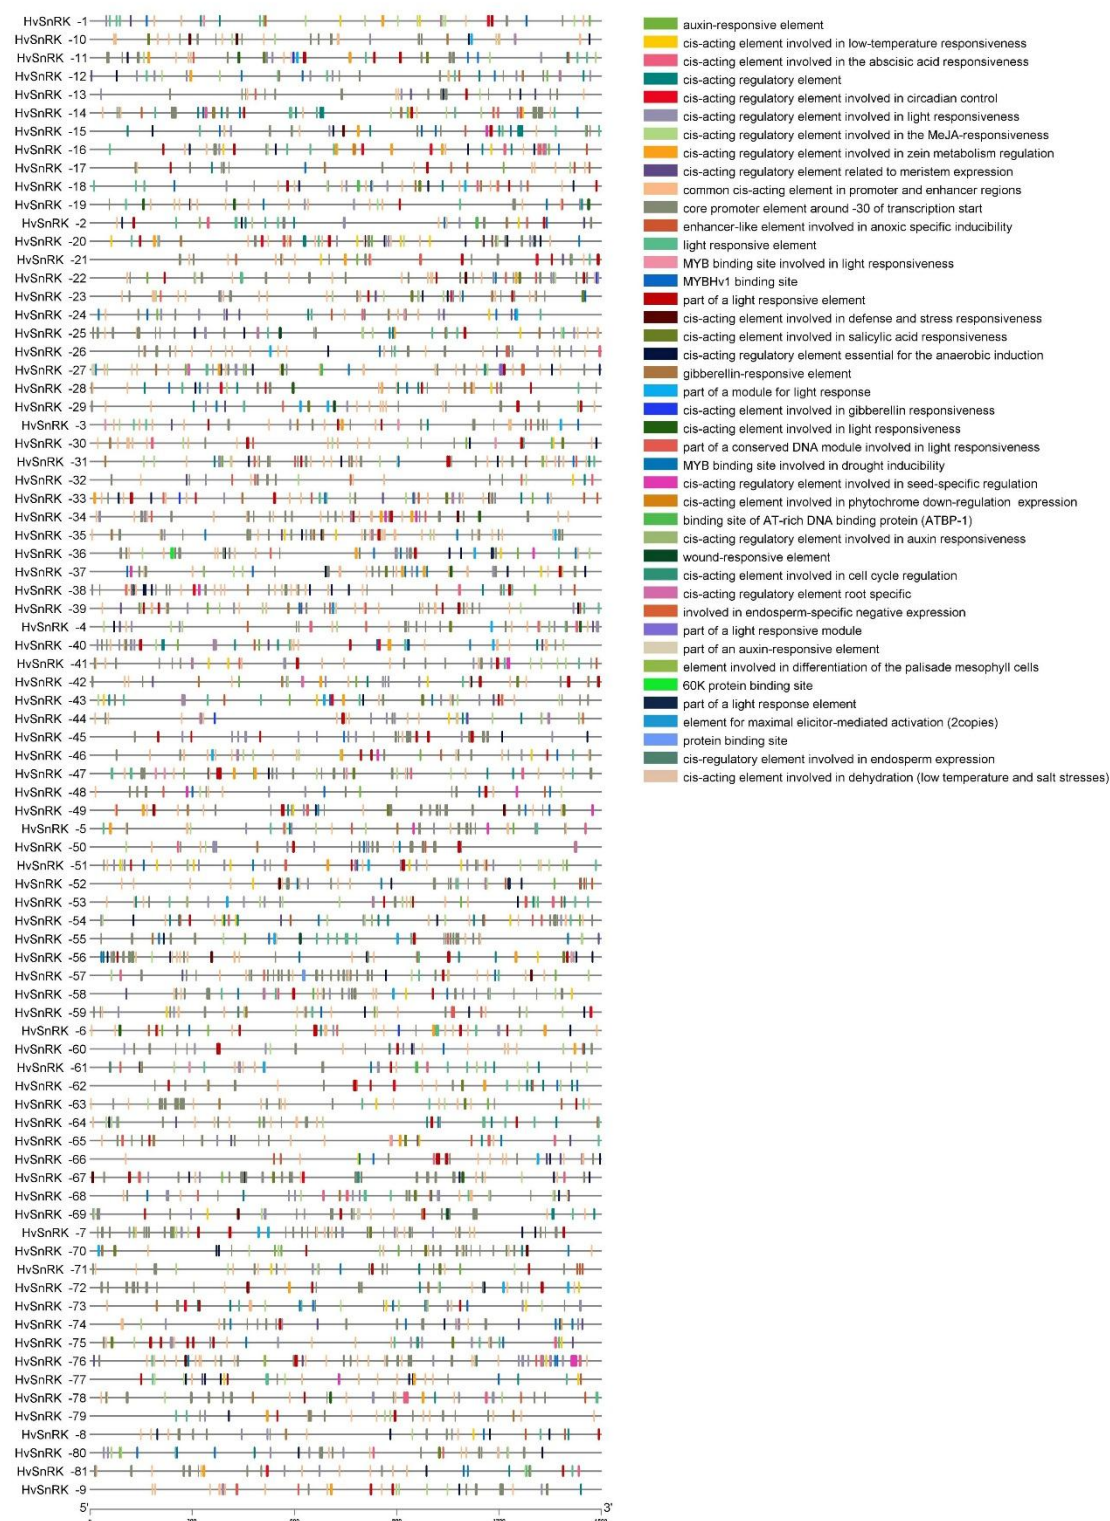

**Fig. S1.** Cis-acting elements in the promoter regions (1500 bp upstream of the start codon) of the *HvSnRK* genes.

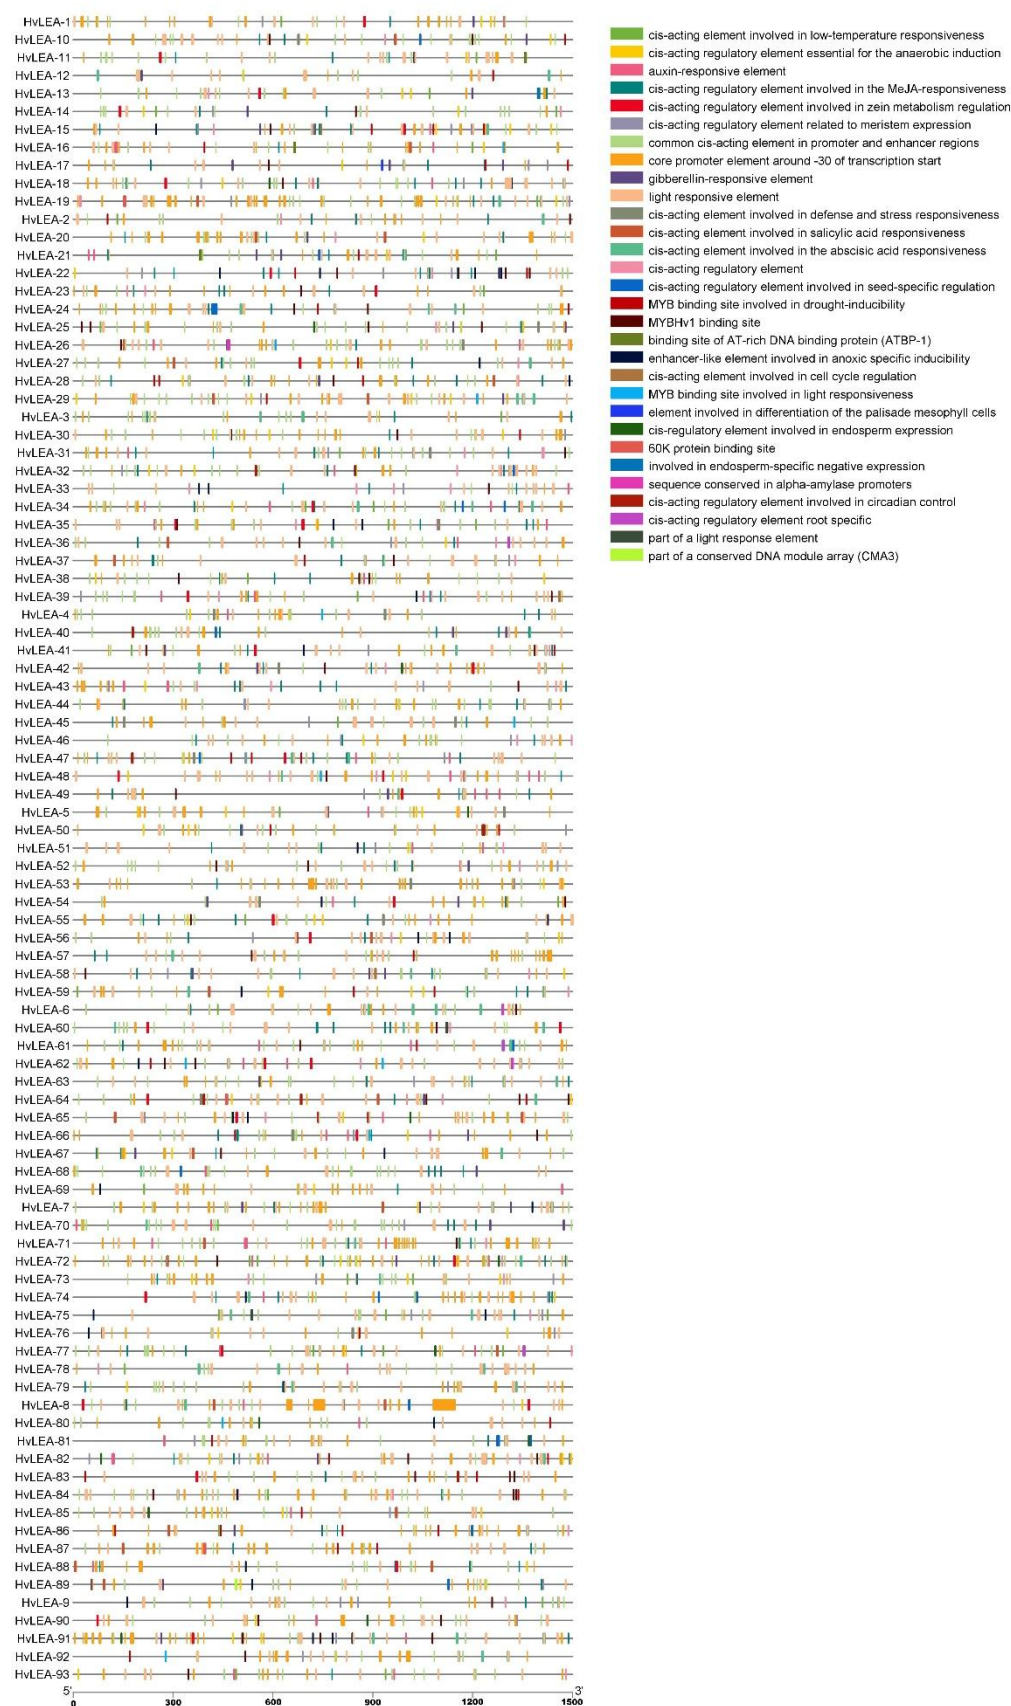

**Fig. S2.** Cis-acting elements in the promoter regions (1500 bp upstream of the start codon) of the *HvLEA* genes.



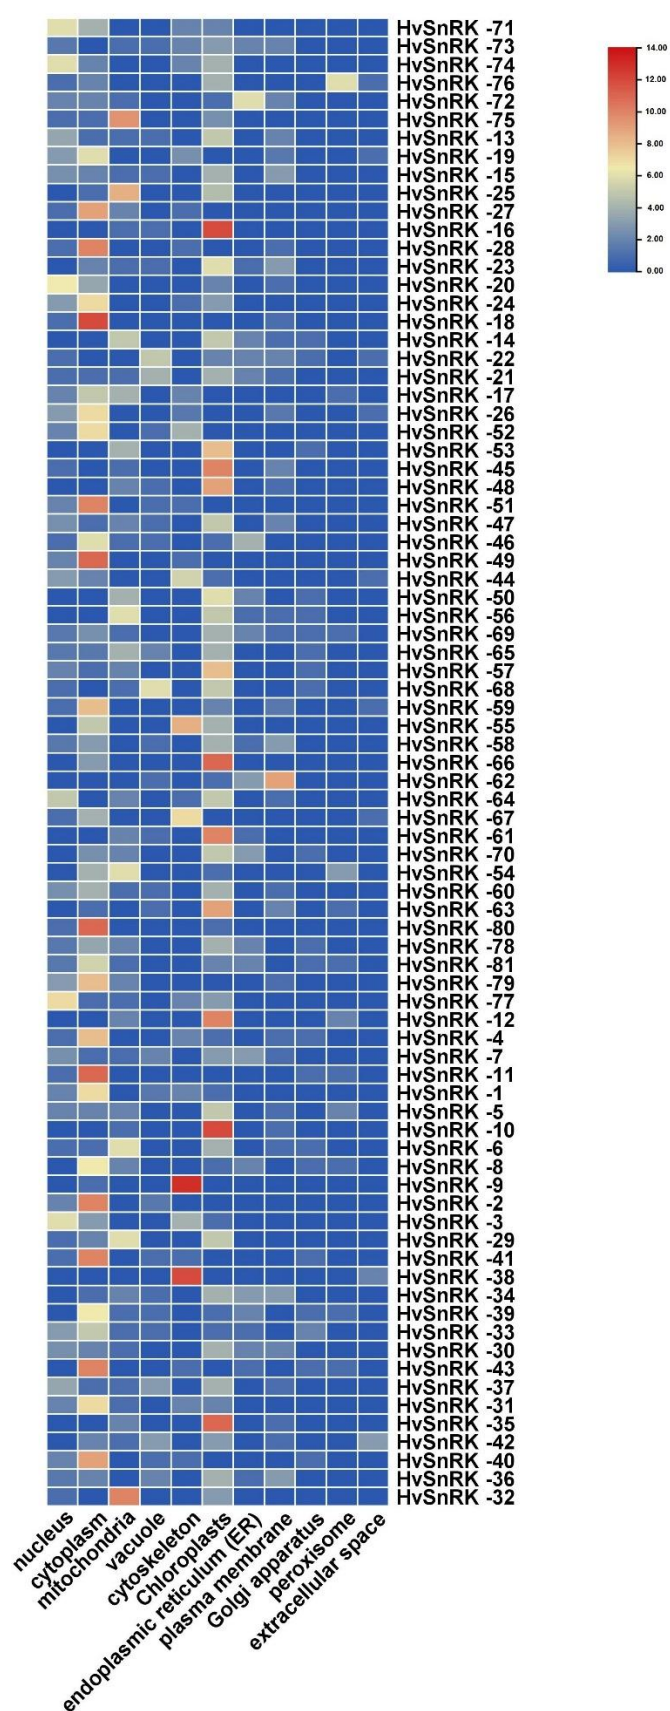

**Fig. S3.** Heatmap showing HvSnRK proteins localization prediction in different organelle.

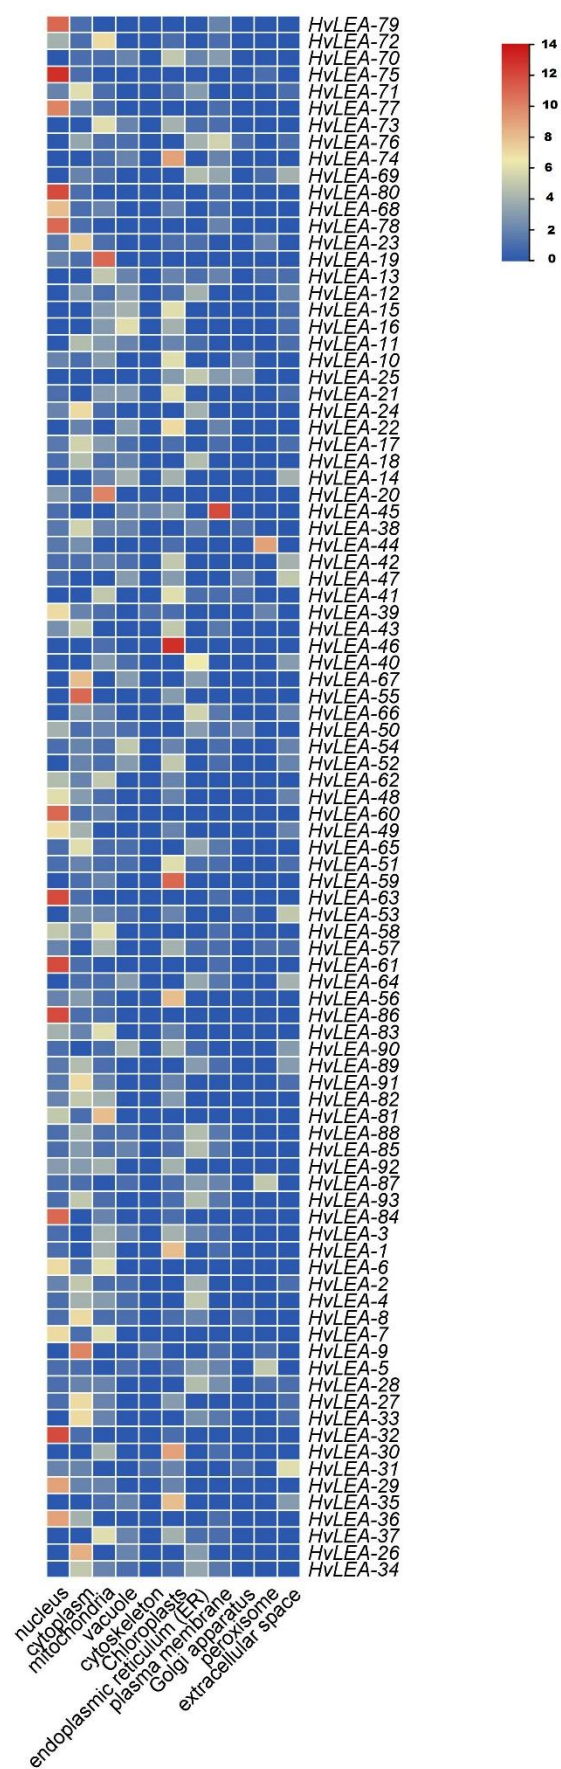

**Fig. S4.** Heatmap showing HvLEA proteins localization prediction in different organelle.
